# Supplementary material for: Intramolecular hydrogen bond activation for kinetic resolution of furanone derivatives by an organocatalyzed [3 + 2] asymmetric cycloaddition
Source: Royal Society of Chemistry journal article supplement (doi:10.1039/d3qo01471a), 2023-10-11
Supplement: d3qo01471a1.pdf [file d3qo01471a1.pdf]

# **Intramolecular Hydrogen Bond Activation for Kinetic Resolution of Furanone Derivatives by an Organocatalyzed [3+2] Asymmetric Cycloaddition**

Miguel A. Valle-Amores,<sup>a</sup> Claudia Feberero,<sup>a,b</sup> Ana Martín-Somer,<sup>c</sup> Sergio Díaz-Tendero<sup>d,e,f</sup> Andrew D. Smith,<sup>g</sup> Alberto Fraile<sup>\*a,e</sup> and José Alemán<sup>\*a,e</sup>

<sup>a</sup> Organic Chemistry Department (Módulo 1), Facultad de Ciencias, Universidad Autónoma de Madrid, 28049-Madrid, Spain. Webpage: [www.uam.es/jose.aleman](http://www.uam.es/jose.aleman)

<sup>b</sup> Organic Chemistry Area, Chemistry Department, Universidad de Burgos. Burgos-09001, Spain.

<sup>c</sup> Applied Physical Chemistry Department (Módulo 14), Facultad de Ciencias, Universidad Autónoma de Madrid, 28049-Madrid, Spain.

<sup>d</sup> Chemistry Department (Módulo 13), Facultad de Ciencias, Universidad Autónoma de Madrid, 28049-Madrid, Spain.

<sup>e</sup> Institute for Advanced Research in Chemical Sciences (IAdChem), Universidad Autónoma de Madrid, 28049 Madrid, Spain.

<sup>f</sup> Condensed Matter Physics Center (IFIMAC), Universidad Autónoma de Madrid, 28049 Madrid, Spain.

<sup>g</sup> EaStCHEM, School of Chemistry, University of St Andrews, North Haugh, Fife, Scotland, KY16 9ST, UK.

## Table of Contents

|                                                                                                    |     |
|----------------------------------------------------------------------------------------------------|-----|
| Experimental Procedures.....                                                                       | 3   |
| General Procedure (GP1) for the Synthesis of Imines <b>1</b> .....                                 | 4   |
| General Procedure (GP2) for the Synthesis of Dipolarophiles ( $\pm$ )- <b>2e-g</b> .....           | 6   |
| Synthesis of 1-Acetyl-5-methoxy-1 <i>H</i> -pyrrol-2(5 <i>H</i> )-one (( $\pm$ )- <b>2h</b> )..... | 7   |
| Screening of the Reaction Conditions.....                                                          | 9   |
| General Procedure (GP3) for the synthesis of compounds <b>4</b> . ....                             | 10  |
| Further derivatizations of (–)- <b>2a</b> in one pot and direct procedures. ....                   | 23  |
| NMR Spectra.....                                                                                   | 25  |
| SFC-HPLC traces of cycloadducts <b>4</b> .....                                                     | 69  |
| SFC-HPLC traces of furanones <b>2</b> .....                                                        | 94  |
| SFC-HPLC traces of compounds <b>5-7</b> .....                                                      | 120 |
| Quantum Chemistry Calculations: <i>endo/exo</i> approximations. ....                               | 123 |
| References .....                                                                                   | 124 |

## Experimental Procedures.

The  $^1\text{H}$ -NMR and  $^{13}\text{C}$ -NMR spectra were recorded on a *Bruker Avance 300 MHz spectrometer* running at 300 MHz for  $^1\text{H}$  and 75 MHz for  $^{13}\text{C}$  or on a *Bruker DRX-500 spectrometer* running at 126 MHz for  $^{13}\text{C}$  and 471 MHz for  $^{19}\text{F}$  coupled mode, respectively. The chemical shifts ( $\delta$ ) are reported relative to the tetramethylsilane signal at 0 ppm or relative to the residual signal of the solvent ( $\text{CDCl}_3$  at 7.26 ppm), ( $(\text{CD}_3)_2\text{SO}$ ) at 2.50 ppm), ( $\text{CD}_2\text{Cl}_2$  at 5.32 ppm), ( $\text{CD}_3\text{CN}$  at 1.94 ppm) while for  $^{13}\text{C}$ -NMR are given in ppm relative to the residual signal of solvent ( $\text{CDCl}_3$  at 77.16 ppm), ( $(\text{CD}_3)_2\text{SO}$ ) at 39.5 ppm), ( $\text{CD}_2\text{Cl}_2$  at 53.84 ppm), ( $\text{CD}_3\text{CN}$  at 1.32 ppm and 118.26 ppm)  $^{13}\text{C}$  NMR spectra were acquired on a broadband decoupled mode.  $^{19}\text{F}$  NMR were acquired on a broadband decoupled and coupled mode indicated in each case. The following abbreviations are used to indicate the multiplicity: s, singlet; d, doublet; dd, doublet of doublets; ddd, doublet of doublet of doublets; t, triplet; dt, doublet of triplets; td, triplet of doublets; tt, triplet of triplets; q, quartet; dq, doublet of quartets; p, pentet; sept, septet; m, multiplet; br, broad signal. The following abbreviations are used to indicate the solvents: Cy, Cyclohexane; DCM, dichloromethane, EtOH, Ethanol; EtOAc, Ethyl acetate; MeOH, Methanol; THF, Tetrahydrofuran.

Optical rotations were measured on an Anton Paar NCP 100 Polarimeter at room temperature and  $[\alpha]^{20}_{\text{D}}$  values are given in  $\text{deg}\cdot\text{mL}\cdot\text{g}^{-1}\cdot\text{dm}^{-1}$ ; concentration  $c$  is listed in  $\text{g}\cdot(100\text{ mL})^{-1}$ .

Enantiomeric excess was determined on an *SFC Agilent Technologies 1260 Infinity Series* instrument equipped with a UV-VIS detector, employing *Daicel Chiralpak* IA, IB-3, IC, ID, and IG-3 columns as chiral stationary phase. The exact conditions for the analyses are specified in each case.

High-Resolution Mass Spectra (HRMS) were obtained on an *Agilent Technologies 6120 Quadrupole LC/MS* coupled with an *SFC Agilent technologies 1260 Infinity Series* instrument for the ESI-MS (Electrospray Ionization). *MassWorks* software version 4.0.0.0 (*Cerno Bioscience*) was used for the formula identification. *MassWorks* is an MS calibration software which calibrates isotope profiles to achieve high mass accuracy and enables elemental composition determination on conventional mass spectrometers of unit mass resolution allowing highly accurate comparisons between calibrated and theoretical spectra.<sup>1</sup>

Commercial grade reagents and solvent were purchased from *Sigma-Aldrich*, *Alfa Aesar*, *Fluorochem*, *TCI Chemicals* and used without further purifications while anhydrous solvents were taken from a SPS solvent dispenser. Racemic samples were prepared from a 1:1 mixture of compounds using (*S,S*) and (*R,R*) catalysts. Analytical TLC was performed using pre-coated aluminium-backed plates (*Merck TLC Silicagel* 60 F<sub>254</sub>) and visualized by ultraviolet irradiation. Chromatographic purification of products was accomplished using flash column chromatography (FC) on Merck Geduran® Si 60 silica gel (40 – 63  $\mu\text{m}$ ), or Iatrobeads 6RS –8060 (*Iatroscan*), or Florisil® 100-200 mesh (*Thermoscientific*). Celite® 512 medium (*Sigma-Aldrich*) was used for filtration. Organic solutions were concentrated under reduced pressure on a Büchi rotary evaporator.

Commercially available reagents and catalyst were used without further purification. Racemic samples were prepared using a 1:1 mixture of both catalyst enantiomers. Aldimines **1a**,<sup>2</sup> **1b**, **1j**, **1k**, **1m**, **1n** and **1o**,<sup>3</sup> **1f**,<sup>4</sup> **1p**<sup>5</sup> and **1r**<sup>6</sup> have been synthesized following the general procedure (GP1), described before, and their spectroscopic data are in agreement with published data. 5-Methoxy-2(5*H*)-furanone (( $\pm$ )-**2a**),<sup>7</sup> 5-ethoxy-2(5*H*)-furanone (( $\pm$ )-**2b**),<sup>8</sup> 5-(ethylthio)furan-2(5*H*)-one (( $\pm$ )-**2c**)<sup>9</sup> and 3-bromo-5-methoxy-2(5*H*)-furanone (( $\pm$ )-**2d**)<sup>10</sup> were synthesized following the procedures described in the literature.

## General Procedure (GP1) for the Synthesis of Imines 1.

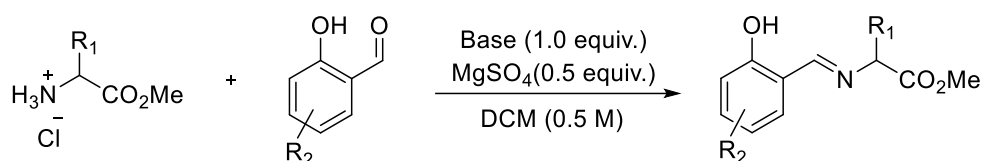

Base (1.0 equiv.) and  $\text{MgSO}_4$  were added to a solution of the corresponding glycine ester hydrochloride (1.0 equiv.) in DCM ([0.5]M). The mixture was stirred at rt for 1 h. Then, the corresponding aldehyde (1.02 equiv.) was added, and the mixture was stirred at rt for 24-48h followed by TLC. The suspension was filtered and concentrated in vacuum. The residue was dissolved in water and extracted with  $\text{Et}_2\text{O}$ . The combined organic layers were dried over  $\text{MgSO}_4$  and concentrated under vacuum. The product was used without further purification or purified by flash column chromatography specified in each case on Florisil.

### Methyl (*E*)-2-((2-hydroxy-4-methylbenzylidene)amino)acetate (**1c**):

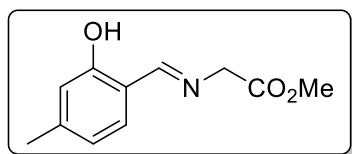

The reaction of 2-hydroxy-4-methylbenzaldehyde (416.1 mg, 3.06 mmol), methyl glycinate hydrochloride (376.6 mg, 3 mmol),  $\text{MgSO}_4$  (180.5 mg, 1.5 mmol) and  $\text{Et}_3\text{N}$  (0.42 mL, 3 mmol) in  $\text{CH}_2\text{Cl}_2$ , following the general procedure **GP1** and purification by flash column chromatography (Cy:EtOAc = 80:20), yielded compound **1c** as a yellow solid (279.8 mg, 45% yield).

$^1\text{H}$  NMR (300 MHz,  $\text{CDCl}_3$ )  $\delta$ : 12.87 (brs, 1H), 8.25 (s, 1H), 7.10 (d,  $J$  = 7.8 Hz, 1H), 6.76 (s, 1H), 6.67 (d,  $J$  = 7.8 Hz, 1H), 4.31 (s, 2H), 3.73 (s, 3H), 2.30 (s, 3H).  $^{13}\text{C}$  NMR (75 MHz,  $\text{CDCl}_3$ )  $\delta$ : 169.8, 168.2, 160.9, 143.7, 131.5, 119.8, 117.3, 116.2, 59.5, 52.1, 21.7. **ESI-HRMS** calculated for  $\text{C}_{11}\text{H}_{14}\text{NO}_3$  ( $\text{M}+\text{H}^+$ ): 208.0968; found: 208.0962.

### Methyl (*E*)-2-((2-hydroxy-5-methylbenzylidene)amino)acetate (**1d**):

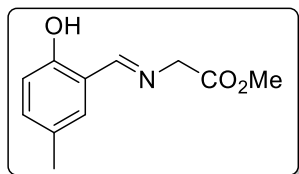

The reaction of 2-hydroxy-5-methylbenzaldehyde (416.1 mg, 3.06 mmol), methyl glycinate hydrochloride (376.6 mg, 3 mmol),  $\text{MgSO}_4$  (180.5 mg, 1.5 mmol) and  $\text{Et}_3\text{N}$  (0.42 mL, 3 mmol) in  $\text{CH}_2\text{Cl}_2$ , following the general procedure **GP1** and purification by flash column chromatography (Cy:EtOAc = 80:20), yielded compound **1d** as a yellow solid (348.1 mg, 56% yield).

$^1\text{H}$  NMR (300 MHz,  $\text{CDCl}_3$ )  $\delta$ : 12.72 (s, 1H), 8.33 (s, 1H), 7.17 (dd,  $J$  = 8.4, 2.2 Hz, 1H), 7.08 (d,  $J$  = 2.2 Hz, 1H), 6.91 (d,  $J$  = 8.4 Hz, 1H), 4.40 (s, 2H), 3.81 (s, 3H), 2.32 (s, 3H).  $^{13}\text{C}$  NMR (75 MHz,  $\text{CDCl}_3$ )  $\delta$ : 169.8, 168.6, 158.8, 133.7, 131.8, 127.8, 118.3, 116.9, 59.8, 52.2, 20.3. **ESI-HRMS** calculated for  $\text{C}_{11}\text{H}_{14}\text{NO}_3$  ( $\text{M}+\text{H}^+$ ): 208.0968; found: 208.0978.

### Methyl (*E*)-2-((2-hydroxy-4-methoxybenzylidene)amino)acetate (**1e**):

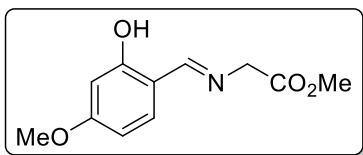

The reaction of 2-hydroxy-4-methoxybenzaldehyde (465.6 mg, 3.06 mmol), methyl glycinate hydrochloride (376.6 mg, 3 mmol),  $\text{MgSO}_4$  (180.5 mg, 1.5 mmol) and  $\text{Et}_3\text{N}$  (0.42 mL, 3 mmol) in  $\text{CH}_2\text{Cl}_2$ , following the general procedure **GP1** and purification by flash column chromatography (Cy:EtOAc = 70:30), yielded compound **1e** as a yellow solid (414.9 mg, 62% yield).

$^1\text{H}$  NMR (300 MHz,  $\text{CDCl}_3$ )  $\delta$ : 13.37 (brs, 1H), 8.25 (s, 1H), 7.15 (d,  $J$  = 8.4 Hz, 1H), 6.48 (d,  $J$  = 2.4 Hz, 1H), 6.44 (dd,  $J$  = 8.4, 2.4 Hz, 1H), 4.34 (s, 2H), 3.82 (s, 3H), 3.78 (s, 3H).  $^{13}\text{C}$  NMR (75 MHz,  $\text{CDCl}_3$ )  $\delta$ : 170.0, 167.6, 163.9,

163.7, 133.0, 112.5, 106.7, 101.1, 59.3, 55.4, 52.3. **ESI-HRMS** calculated for  $C_{11}H_{14}NO_4$  ( $M+H$ )<sup>+</sup>: 224.0917; found: 224.0903.

**Methyl (*E*)-2-((4-(diethylamino)-2-hydroxybenzylidene)amino)acetate (**1g**):**

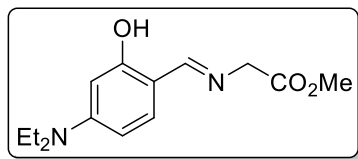

The reaction of 4-(diethylamino)-2-hydroxybenzaldehyde (591.3 mg, 3.06 mmol), methyl glycinate hydrochloride (376.6 mg, 3 mmol),  $MgSO_4$  (180.5 mg, 1.5 mmol) and  $Et_3N$  (0.42 mL, 3 mmol) in  $CH_2Cl_2$ , following the general procedure **GP1** and purification by flash column chromatography (Cy:EtOAc = 70:30), yielded de compound **1g** as a yellow solid (301.3 mg, 38% yield).

**$^1H$  NMR** (300 MHz,  $CDCl_3$ )  $\delta$ : 13.29 (brs, 1H), 8.14 (s, 1H), 7.06 (d,  $J$  = 8.6 Hz, 1H), 6.25 – 6.10 (m, 2H), 4.31 (s, 2H), 3.79 (s, 3H), 3.40 (q,  $J$  = 7.1 Hz, 4H), 1.21 (t,  $J$  = 7.1 Hz, 6H).  **$^{13}C$  NMR** (75 MHz,  $CDCl_3$ )  $\delta$ : 170.5, 166.9, 164.0, 151.5, 133.1, 108.4, 103.2, 97.9, 59.1, 52.1, 44.5, 12.7. **ESI-HRMS** calculated for  $C_{14}H_{21}N_2O_3$  ( $M+H$ )<sup>+</sup>: 265.1547; found: 265.1557.

**Methyl (*E*)-2-((4-fluoro-2-hydroxybenzylidene)amino)acetate (**1h**):**

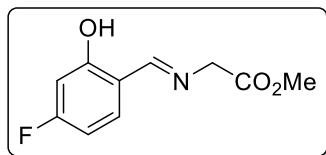

The reaction of 4-fluoro-2-hydroxybenzaldehyde (428.7 mg, 3.06 mmol), methyl glycinate hydrochloride (376.6 mg, 3 mmol),  $MgSO_4$  (180.5 mg, 1.5 mmol) and  $Et_3N$  (0.42 mL, 3 mmol) in  $CH_2Cl_2$ , following the general procedure **GP1** and purification by flash column chromatography (Cy:EtOAc = 80:20), yielded de compound **1h** as a yellow solid (291.4 mg, 46% yield).

**$^1H$  NMR** (300 MHz,  $CDCl_3$ )  $\delta$ : 8.30 (s, 1H), 7.26–7.19 (m, 1H), 6.66 – 6.53 (m, 2H), 4.35 (s, 2H), 3.77 (s, 3H).  **$^{13}C$  NMR** (75 MHz,  $CDCl_3$ )  $\delta$ : 169.7, 167.7, 165.7 (d,  $J$  = 252.1 Hz), 163.8 (d,  $J$  = 13.9 Hz), 133.6 (d,  $J$  = 11.7 Hz), 115.5, 106.6 (d,  $J$  = 23.2 Hz), 104.4 (d,  $J$  = 23.6 Hz), 59.2, 52.5. **ESI-HRMS** calculated for  $C_{10}H_{11}FNO_3$  ( $M+H$ )<sup>+</sup>: 212.0717; found: 212.0729.

**(*E*)-Methyl-2-((4-bromo-2-hydroxybenzylidene)amino)acetate (**1i**):**

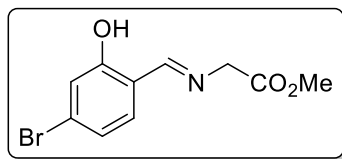

The reaction of 4-bromo-2-hydroxybenzaldehyde (615.1 mg, 3.06 mmol), methyl glycinate hydrochloride (376.6 mg, 3 mmol),  $MgSO_4$  (180.5 mg, 1.5 mmol) and  $Et_3N$  (0.42 mL, 3 mmol) in  $CH_2Cl_2$ , following the general procedure **GP1** and purification by flash column chromatography (Cy:EtOAc = 80:20), yielded de compound **1i** as a yellow solid (481.6 mg, 59% yield).

**$^1H$  NMR** (300 MHz,  $CDCl_3$ )  $\delta$ : 8.25 (s, 1H), 7.10 (d,  $J$  = 1.9 Hz, 1H), 7.05 (d,  $J$  = 8.2 Hz, 1H), 6.95 (dd,  $J$  = 8.2, 1.9 Hz, 1H), 4.35 (s, 2H), 3.75 (s, 3H).  **$^{13}C$  NMR** (75 MHz,  $CDCl_3$ )  $\delta$ : 169.5, 167.8, 162.2, 132.8, 127.3, 122.0, 120.6, 117.3, 59.1, 52.4. **ESI-HRMS** calculated for  $C_{10}H_{11}BrNO_3$  ( $M+H$ )<sup>+</sup>: 271.9917 and 273.9897; found: 271.9931; 273.9911.

**Methyl (*E*)-4-hydroxy-3-(((2-methoxy-2-oxoethyl)imino)methyl)benzoate (**1l**):**

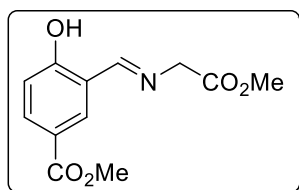

The reaction of methyl 3-formyl-4-hydroxybenzoate (551.3 mg, 3.06 mmol), methyl glycinate hydrochloride (376.6 mg, 3 mmol),  $MgSO_4$  (180.5 mg, 1.5 mmol) and  $Na_2CO_3$  (317.9 mg, 3 mmol) in  $CH_2Cl_2$ , following the general procedure **GP1** and purification by flash column chromatography (Cy:EtOAc = 80:20), yielded de compound **1l** as a yellow solid (376.8 mg, 50% yield).

**<sup>1</sup>H NMR** (300 MHz, CDCl<sub>3</sub>)  $\delta$ : 13.57 (brs, 1H), 8.36 (s, 1H), 8.00 – 7.91 (m, 2H), 6.94 (d,  $J$  = 9.1 Hz, 1H), 4.38 (s, 2H), 3.84 (s, 3H), 3.74 (s, 3H). **<sup>13</sup>C NMR** (75 MHz, CDCl<sub>3</sub>)  $\delta$ : 169.4, 168.1, 166.2, 165.2, 134.1, 120.8, 118.0, 117.4, 59.3, 52.4, 52.0. **ESI-HRMS** calculated for C<sub>12</sub>H<sub>14</sub>NO<sub>5</sub> (M+H)<sup>+</sup>: 252.0866; found: 252.0876.

**(E)-2-((2-hydroxybenzylidene)amino)-N,N-dimethylacetamide (1q):**

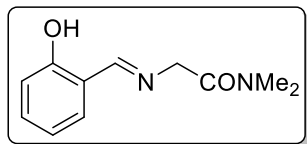

The reaction of 2-hydroxybenzaldehyde (373.7 mg, 3.06 mmol), 2-amino-*N,N*-dimethylacetamide hydrochloride (415.8 mg, 3 mmol), MgSO<sub>4</sub> (180.5 mg, 1.5 mmol) and Et<sub>3</sub>N (0.42 mL, 3 mmol) in CH<sub>2</sub>Cl<sub>2</sub>, following the general procedure **GP1** and purification by flash column chromatography (Cy:EtOAc = 80:20), yielded de compound **1q** as a yellow solid (259.9 mg, 42% yield).

**<sup>1</sup>H NMR** (300 MHz, CDCl<sub>3</sub>)  $\delta$ : 12.94 (s, 1H), 8.32 (s, 1H), 7.28 – 7.19 (m, 2H), 6.89 (d,  $J$  = 8.3 Hz, 1H), 6.81 (t,  $J$  = 7.4 Hz, 1H), 4.35 (s, 2H), 3.04 (s, 3H), 2.90 (s, 3H). **<sup>13</sup>C NMR** (75 MHz, CDCl<sub>3</sub>)  $\delta$ : 168.1, 168.0, 160.8, 132.5, 131.6, 118.6, 118.6, 116.8, 60.5, 36.9, 35.4. **ESI-HRMS** calculated for C<sub>11</sub>H<sub>15</sub>N<sub>2</sub>O<sub>2</sub> (M+H)<sup>+</sup>: 207.1128; found: 207.1114.

**(E)-2-((2-hydroxybenzylidene)amino)-N-methoxy-N-methylacetamide (1s):**

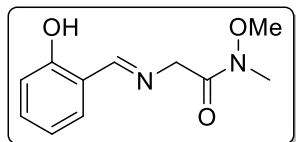

*Tert*-butyl (2-(methoxy(methyl)amino)-2-oxoethyl)carbamate (655mg, 3 mmol) was dissolved in 2.5 mL of CHCl<sub>3</sub> and stirred for 5 min at 0 °C. Then, HCl 1M in Et<sub>2</sub>O (25mL) was added dropwise. The reaction was followed by TLC. The white solid formed was filtered and used without further purification in the next step. The reaction of 2-hydroxybenzaldehyde (373.7 mg, 3.06 mmol), 2-(methoxy(methyl)amino)-2-oxoethanaminium hydrochloride (463.8 mg, 3 mmol), MgSO<sub>4</sub> (180.5 mg, 1.5 mmol) and Et<sub>3</sub>N (0.42 mL, 3 mmol) in CH<sub>2</sub>Cl<sub>2</sub>, following the general procedure **GP1** and purification by flash column chromatography (Cy:EtOAc = 90:10), yielded de compound **1s** as a yellow solid (433.4 mg, 60% yield).

**<sup>1</sup>H NMR** (300 MHz, CDCl<sub>3</sub>)  $\delta$ : 8.41 (s, 1H), 7.36 – 7.28 (m, 2H), 6.98 (d,  $J$  = 8.2 Hz, 1H), 6.88 (td,  $J$  = 7.5, 1.1 Hz, 1H), 4.53 (s, 2H), 3.77 (s, 3H), 3.25 (s, 3H). **<sup>13</sup>C NMR** (75 MHz, CDCl<sub>3</sub>)  $\delta$  (ppm): 169.7, 168.9, 161.3, 132.8, 131.8, 118.9, 118.8, 117.3, 61.8, 58.99, 29.9. **ESI-HRMS** calculated for C<sub>11</sub>H<sub>15</sub>N<sub>2</sub>O<sub>3</sub> (M+H)<sup>+</sup>: 223.1077; found: 223.1073.

**General Procedure (GP2) for the Synthesis of Dipolarophiles (±)-2e-g**

Cesium fluoride (0.563 g, 3.71 mmol), BnNEt<sub>3</sub>Cl (0.014 g, 0.061 mmol), corresponding boronic acid (2.47 mmol), and PdCl<sub>2</sub>(PPh<sub>3</sub>)<sub>2</sub> (0.043 g, 0.061 mmol) were dissolved in 10 mL of degassed water. The mixture was further degassed by evacuation and back-fill with N<sub>2</sub> five times. Degassed toluene (5 mL) was added to the reaction mixture followed by dropwise addition of 3-bromo-5-methoxyfuran-2(5*H*)-one ((±)-**2d**) (0.250 g, 1.30 mmol) in degassed toluene (5 mL). The reaction mixture was heated to reflux for 12 h. The reaction was cooled to room temperature, washed with water, and extracted three times with ethyl acetate. The combined organic phases were dried over MgSO<sub>4</sub> and concentrated in vacuum. Purification by flash column chromatography on latrobeads silica gel with the indicated eluent.

#### 5-Methoxy-3-phenylfuran-2(5H)-one ((±)-2e):

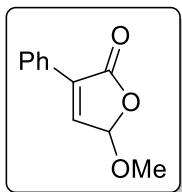

The reaction was carried out using phenylboronic acid (0.301 g, 2.47 mmol) following the general procedure **GP2**. Purification by flash column chromatography on latrobeads silica gel (Cy:EtOAc = 95:5) yielded the compound (**±**)-**2e** as a yellow oil (148.2 mg, 60% yield).

**<sup>1</sup>H NMR** (300 MHz, CDCl<sub>3</sub>) δ: 7.90 – 7.80 (m, 2H), 7.45 – 7.40 (m, 3H), 7.27 (d, *J* = 1.4 Hz, 1H), 5.88 (d, *J* = 1.4 Hz, 1H), 3.63 (s, 3H). **<sup>13</sup>C NMR** (75 MHz, CDCl<sub>3</sub>) δ: 169.6, 141.2, 135.5, 130.2,

128.9, 127.7, 101.7, 57.1. **ESI-HRMS** calculated for C<sub>11</sub>H<sub>11</sub>O<sub>3</sub> (M+H)<sup>+</sup>: 191.0703; found: 191.0709.

#### 5-Methoxy-3-(1-(triisopropylsilyl)-1H-pyrrol-3-yl)furan-2(5H)-one ((±)-2f):

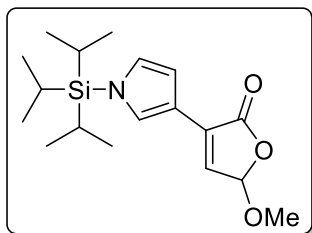

The reaction was carried out using 1-(triisopropylsilyl)-1H-pyrrol-3-yl)boronic acid (0.660 g, 2.47 mmol) following the general procedure **GP2**. Purification by flash column chromatography on latrobeads silica gel (Cy:EtOAc = 95:5) yielded the compound (**±**)-**2f** as a brown oil (174.3 mg, 40% yield).

**<sup>1</sup>H NMR** (300 MHz, CDCl<sub>3</sub>) δ: 7.61 (s, 1H), 6.85 (d, *J* = 1.7 Hz, 1H), 6.77 (t, *J* = 2.3 Hz, 1H), 6.56 – 6.52 (m, 1H), 5.86 (d, *J* = 1.7 Hz, 1H), 3.56 (s, 3H), 1.46 (sept, *J* =

7.4 Hz, 3H), 1.10 (d, *J* = 7.5 Hz, 18H). **<sup>13</sup>C NMR** (75 MHz, CDCl<sub>3</sub>) δ: 170.6, 133.7, 131.2, 126.0, 125.6, 115.0, 109.4, 102.7, 56.3, 17.9, 11.7. **ESI-HRMS** calculated for C<sub>18</sub>H<sub>30</sub>NO<sub>3</sub>Si (M+H)<sup>+</sup>: 336.1989; found: 336.1984.

#### (E)-5-Methoxy-3-(oct-1-en-1-yl)furan-2(5H)-one ((±)-2g):

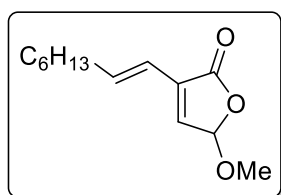

The reaction was carried out using (E)-oct-1-en-1-ylboronic acid (0.436 g, 2.8 mmol) following the general procedure **GP2**. Purification by flash column chromatography on latrobeads silica gel (Cy:EtOAc = 97:3) yielded the compound (**±**)-**2g** as a yellow oil (113 mg, 39% yield).

**<sup>1</sup>H NMR** (300 MHz, CDCl<sub>3</sub>) δ: 6.85 (dt, *J* = 15.9, 7.0 Hz, 1H), 6.76 (d, *J* = 1.5 Hz, 1H), 6.09 (d, *J* = 15.9 Hz, 1H), 5.75 (d, *J* = 1.5 Hz, 1H), 3.54 (s, 3H), 2.22 – 2.11 (m, 2H), 1.36 – 1.20 (m, 8H), 0.91 – 0.83 (m, 3H). Spectroscopic data are in agreement with published data.<sup>11</sup>

#### Synthesis of 1-Acetyl-5-methoxy-1H-pyrrol-2(5H)-one ((±)-2h)

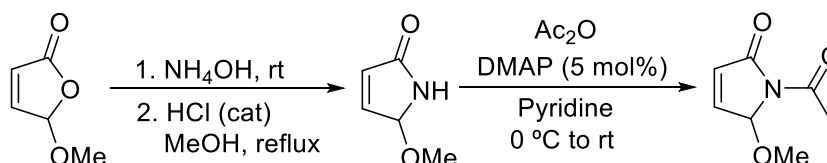

5-Methoxyfuran-2(5H)-one (**±**)-**2a** (171 mg, 1.5 mmol) was stirred on aq. NH<sub>3</sub> (28%) for 1h. After completion, followed by TLC, the reaction was washed with water and extracted three times with ethyl acetate. The combined organic phases were dried over MgSO<sub>4</sub> and concentrated in vacuum.

The reaction crude was dissolved in MeOH (25 mL) and 1 drop of concentrated HCl was added. The solution was stirred reflux temperature for 2h. After that, the reaction was quenched with a solution of sodium acetate in water [0.05]M and extracted with ethyl acetate three times. The organic phase was dried over MgSO<sub>4</sub> and concentrated in vacuum. The obtained product was used without further purification in the next step.

To crude 5-methoxy-1*H*-pyrrol-2(5*H*)-one was added acetic anhydride (2.4 mL, 25.4 mmol) and the resulting solution was stirred under N<sub>2</sub> at 0 °C. Then, pyridine (2 equiv.) and DMAP (5 mol%) were added and the reaction was stirred at room temperature for 2h. After completion, the reaction was quenched with NH<sub>4</sub>Cl (sat) and extracted with CH<sub>2</sub>Cl<sub>2</sub>. The combined organic phases were dried over MgSO<sub>4</sub> and concentrated in vacuum. Purification by flash column chromatography on latrobeads silica gel (Cy:EtOAc = 90:10) yielded de compound (**±**)-**2h** as a colourless oil (208 mg, 90% yield).

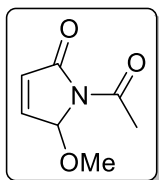

**<sup>1</sup>H NMR** (300 MHz, CDCl<sub>3</sub>)  $\delta$ : 7.08 (dd, *J* = 6.1, 2.0 Hz, 1H), 6.17 (dd, *J* = 6.1, 0.8 Hz, 1H), 5.99 (dd, *J* = 2.0, 0.8 Hz, 1H), 3.44 (s, 3H), 2.54 (s, 3H). **<sup>13</sup>C NMR** (75 MHz, CDCl<sub>3</sub>)  $\delta$ : 170.1, 168.7, 146.8, 128.1, 87.8, 55.5, 25.0. **ESI-HRMS** calculated for C<sub>7</sub>H<sub>10</sub>NO<sub>3</sub> (M+H)<sup>+</sup>: 156.0656; found: 156.0654.

## Screening of the Reaction Conditions

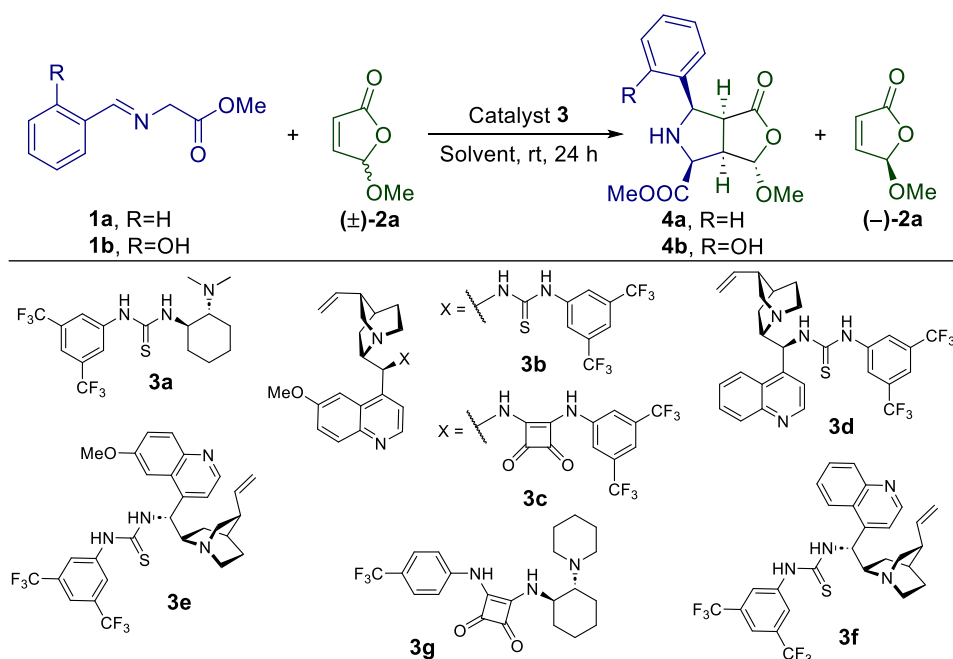

| Entry <sup>a</sup> | Imine     | Cat (mol%)     | Solvent                         | Conv (%) <sup>b</sup> | ee <b>4b</b> (%) <sup>c</sup> | ee <b>(-)-2a</b> (%) <sup>c</sup> | s (c%) <sup>d</sup> |
|--------------------|-----------|----------------|---------------------------------|-----------------------|-------------------------------|-----------------------------------|---------------------|
| 1                  | <b>1a</b> | <b>3a</b> (20) | <i>p</i> -xylene                | 15                    | 21 ( <b>4a</b> )              | ---                               | ---                 |
| 2                  | <b>1b</b> | <b>3a</b> (20) | <i>p</i> -xylene                | 48                    | 97                            | 87                                | 190 (47)            |
| 3                  | <b>1b</b> | ---            | <i>p</i> -xylene                | <5                    | ---                           | ---                               | ---                 |
| 4                  | <b>1b</b> | <b>3b</b> (20) | <i>p</i> -xylene                | 40                    | 96                            | 65                                | 96 (40)             |
| 5                  | <b>1b</b> | <b>3c</b> (20) | <i>p</i> -xylene                | 10                    | ---                           | ---                               | ---                 |
| 6                  | <b>1b</b> | <b>3d</b> (20) | <i>p</i> -xylene                | 20                    | ---                           | ---                               | ---                 |
| 7                  | <b>1b</b> | <b>3e</b> (20) | <i>p</i> -xylene                | 18                    | ---                           | ---                               | ---                 |
| 8                  | <b>1b</b> | <b>3f</b> (20) | <i>p</i> -xylene                | 19                    | ---                           | ---                               | ---                 |
| 9                  | <b>1b</b> | <b>3g</b> (20) | <i>p</i> -xylene                | <5                    | ---                           | ---                               | ---                 |
| 10                 | <b>1b</b> | <b>3a</b> (20) | CH <sub>2</sub> Cl <sub>2</sub> | 34                    | 86                            | 50                                | 22 (37)             |
| 11                 | <b>1b</b> | <b>3a</b> (20) | Et <sub>2</sub> O               | 47                    | 95                            | 91                                | 124 (48)            |
| 12                 | <b>1b</b> | <b>3a</b> (20) | MTBE                            | 45                    | 91                            | 82                                | 54 (47)             |
| 13                 | <b>1b</b> | <b>3a</b> (20) | Toluene                         | 48                    | 92                            | 98                                | 110 (51)            |
| 14                 | <b>1b</b> | <b>3a</b> (20) | Dioxane                         | 10                    | ---                           | ---                               | ---                 |
| 15 <sup>e</sup>    | <b>1b</b> | <b>3a</b> (20) | <i>p</i> -xylene                | 45                    | 95                            | 81                                | 98 (46)             |
| 16 <sup>f</sup>    | <b>1b</b> | <b>3a</b> (20) | <i>p</i> -xylene                | 37                    | 95                            | 63                                | 74 (39)             |
| 17                 | <b>1b</b> | <b>3a</b> (15) | <i>p</i> -xylene                | 42                    | 97                            | 76                                | 151 (44)            |
| 18                 | <b>1b</b> | <b>3a</b> (10) | <i>p</i> -xylene                | 38                    | 97                            | 55                                | 114 (36)            |
| 19 <sup>g</sup>    | <b>1b</b> | <b>3a</b> (20) | <i>p</i> -xylene                | 48                    | 97                            | 92                                | >200 (49)           |
| 20 <sup>h</sup>    | <b>1b</b> | <b>3a</b> (20) | <i>p</i> -xylene                | 40                    | 95                            | 68                                | 80 (41)             |

<sup>a</sup> The reaction was run from 0.1 mmol of imine **1** and 0.1 mmol of pseudoester **(±)-2a** in 0.3 mL of indicated solvent ([0.33]M). <sup>b</sup> Conversion determined by <sup>1</sup>H-NMR. <sup>c</sup> Determined by chiral SFC. <sup>d</sup> Calculated conversion (C)= $\frac{ee_{SM}}{ee_{SM}+ee_{PR}}$ , Selectivity factor (s)= $\ln\left[\frac{(1-C)(1-ee_{SM})}{(1-C)(1+ee_{SM})}\right]$ . <sup>e</sup> [0.16]M instead of [0.33]M. <sup>f</sup> [0.10]M instead of [0.33]M. <sup>g</sup> The reaction was scaled up to 1.0 mmol of **1**. <sup>h</sup> The reaction was carried out from 0.05 mmol of imine **1b**.

## General Procedure (GP3) for the synthesis of compounds 4.

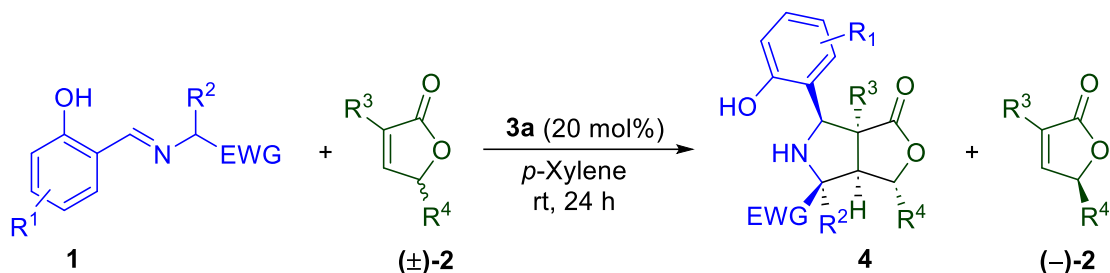

An oven-dried 6 mL vial equipped with a magnetic stirring bar was charged with imine **1** (1.0 equiv.), dipolarophile ( $\pm$ )-**2** (1.0 equiv.) and Takemoto's bifunctional organocatalyst (1-[3,5-Bis(trifluoromethyl)phenyl]-3-[(1*R*,2*R*)-(-)-2-(dimethylamino)cyclohexyl]thiourea) **3a** (20 mol%). Then, *p*-xylene (0.3 mL, [0.33]M) were added and the reaction was stirred for 24 h at room temperature. After the reaction was complete, the solvent was evaporated under reduced pressure and the residue was further purified by flash column chromatography on latrobeads silica gel to afford the corresponding products **4** and (-)-**2**.

### Methyl (3*S*,3*aR*,4*S*,6*R*,6*aS*)-6-(2-hydroxyphenyl)-3-methoxy-1-oxohexahydro-1*H*-furo[3,4-*c*]pyrrole-4-carboxylate (**4b**):

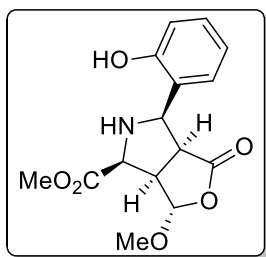

The reaction of methyl (*E*)-2-((2-hydroxybenzylidene)amino)acetate (**1b**) (19.3 mg, 0.1 mmol), 5-methoxy-2(5*H*)-furanone (( $\pm$ )-**2a**) (11.4 mg, 0.1 mmol), and Takemoto's catalyst **3a** (8.2 mg, 20 mol%) in *p*-xylene (0.3 mL, [0.33]M) following the general procedure **GP3** and purification by flash column chromatography (Cy:EtOAc = 40:60), yielded de compound **4b** as a white solid (14.4 mg, 47% yield) and (-)-**2a** as a colorless oil (4.9 mg, 43% yield).

The enantiomeric excess for **4b** was determined by SFC on a *Daicel Chiralpak* IA column: CO<sub>2</sub>/MeOH gradient from 95:5 to 60:40 in 8 min, flow rate 3 mL/min,  $\lambda$  = 210 nm,  $\tau_{\text{minor}}$  = 5.71 min,  $\tau_{\text{major}}$  = 6.45 min (97% ee).  $[\alpha]_{\text{D}}^{20}$  = 0.315 (*c* = 0.4, CHCl<sub>3</sub>). The enantiomeric excess for (-)-**2a** was determined by SFC on a *Daicel Chiralpak* ID column: CO<sub>2</sub>/MeOH (95:5), flow rate 2 mL/min,  $\lambda$  = 210 nm,  $\tau_{\text{minor}}$  = 0.87 min,  $\tau_{\text{major}}$  = 0.74 min (87% ee).  $[\alpha]_{\text{D}}^{20}$  = -0.016 (*c* = 0.32, CHCl<sub>3</sub>). **c** = 47%, **s** = 190 (Calculated as *s* = 188).

*For 1 mmol scale up:* The reaction of methyl (*E*)-2-((2-hydroxybenzylidene)amino)acetate (**1b**) (193 mg, 1 mmol), 5-methoxy-2(5*H*)-furanone (( $\pm$ )-**2a**) (114 mg, 1 mmol), and Takemoto's catalyst **3a** (82.6 mg, 20 mol%) in *p*-xylene (3 mL, [0.33]M) following the general procedure **GP3** and purification by flash column chromatography (Cy:EtOAc = 40:60), yielded de compound **4b** as a white solid (146.9 mg, 47% yield) and (-)-**2a** as a colorless oil (52 mg, 46% yield). The enantiomeric excess for **4b** was determined by SFC on a *Daicel Chiralpak* IA column: CO<sub>2</sub>/MeOH gradient from 95:5 to 60:40 in 8 min, flow rate 3 mL/min,  $\lambda$  = 210 nm,  $\tau_{\text{minor}}$  = 5.71 min,  $\tau_{\text{major}}$  = 6.45 min (97% ee).  $[\alpha]_{\text{D}}^{20}$  = 0.315 (*c* = 0.4, CHCl<sub>3</sub>). The enantiomeric excess for (-)-**2a** was determined by SFC on a *Daicel Chiralpak* ID column: CO<sub>2</sub>/MeOH (95:5), flow rate 2 mL/min,  $\lambda$  = 210 nm,  $\tau_{\text{minor}}$  = 1.34 min,  $\tau_{\text{major}}$  = 1.03 min (92% ee). **c** = 49%, **s** > 200 (Calculated as *s* = 217).

**<sup>1</sup>H NMR** (300 MHz, CD<sub>2</sub>Cl<sub>2</sub>)  $\delta$ : 9.98 (brs, 1H), 7.22 (ddd, *J* = 8.1, 7.3, 1.7 Hz, 1H), 7.10 (dd, *J* = 7.5, 1.7 Hz, 1H), 6.87 (td, *J* = 7.5, 1.2 Hz, 1H), 6.80 (dd, *J* = 8.1, 1.2 Hz, 1H), 5.25 (d, *J* = 3.2 Hz, 1H), 4.60 (d, *J* = 9.3 Hz, 1H), 4.11 (d, *J* = 7.2 Hz, 1H), 3.87 (s, 3H), 3.51 (s, 3H), 3.44 (t, *J* = 9.2 Hz, 1H), 3.30 – 3.23 (m, 1H), 3.02 (brs, 1H). **<sup>13</sup>C NMR**

(75 MHz, CD<sub>2</sub>Cl<sub>2</sub>)  $\delta$ : 172.6, 169.8, 157.7, 129.6, 129.0, 119.7, 119.4, 117.0, 106.3, 64.5, 61.5, 57.5, 52.5, 48.3, 48.2. **ESI-HRMS** calculated for C<sub>15</sub>H<sub>18</sub>NO<sub>6</sub> (M+H)<sup>+</sup>: 308,1129; found: 308.1154.

**Methyl (3*S*,3*aR*,4*S*,6*R*,6*aS*)-6-(2-hydroxy-4-methylphenyl)-3-methoxy-1-oxohexahydro-1*H*-furo[3,4-*c*]pyrrole-4-carboxylate (4c):**

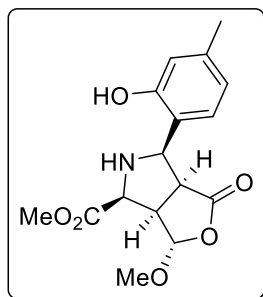

The reaction of methyl (*E*)-2-((2-hydroxy-4-methylbenzylidene)amino)acetate (**1c**) (20.7 mg, 0.1 mmol), 5-methoxy-2(5*H*)-furanone ((**±**)-**2a**) (11.4 mg, 0.1 mmol), and Takemoto's catalyst **3a** (8.2 mg, 20 mol%) in *p*-xylene (0.3 mL, [0.33]M) following the general procedure **GP3** and purification by flash column chromatography (Cy:EtOAc = 40:60), yielded de compound **4c** as a white solid (13.5 mg, 42% yield) and (**–**)-**2a** as a colorless oil (4.7 mg, 41% yield).

The enantiomeric excess for **4c** was determined by SFC on a *Daicel Chiralpak* IA column: CO<sub>2</sub>/MeOH gradient from 95:5 to 60:40 in 8 min, flow rate 3 mL/min,  $\lambda$  = 210 nm,  $\tau_{\text{minor}}$  = 4.63 min,  $\tau_{\text{major}}$  = 5.21 min (99% ee).  $[\alpha]^{20}_{\text{D}}$  = 0.434 (*c* = 0.49, CHCl<sub>3</sub>). The enantiomeric excess for (**–**)-**2a** was determined by SFC on a *Daicel Chiralpak* ID column: CO<sub>2</sub>/MeOH (95:5), flow rate 2 mL/min,  $\lambda$  = 210 nm,  $\tau_{\text{minor}}$  = 1.07 min,  $\tau_{\text{major}}$  = 0.85 min (90% ee). **c** = 48%, **s** > 200 (Calculated as *s* = 618).

**<sup>1</sup>H NMR** (300 MHz, CD<sub>2</sub>Cl<sub>2</sub>)  $\delta$ : 6.93 (d, *J* = 7.7 Hz, 1H), 6.66 (d, *J* = 7.7 Hz, 1H), 6.60 (s, 1H), 5.20 (d, *J* = 3.2 Hz, 1H), 4.54 (d, *J* = 9.1 Hz, 1H), 4.07 (d, *J* = 7.1 Hz, 1H), 3.82 (s, 3H), 3.47 (s, 3H), 3.38 (t, *J* = 9.2 Hz, 1H), 3.25 – 3.18 (m, 1H), 2.27 (s, 3H). **<sup>13</sup>C NMR** (75 MHz, CD<sub>2</sub>Cl<sub>2</sub>)  $\delta$ : 172.5, 169.8, 157.5, 140.0, 128.8, 120.3, 117.7, 116.5, 106.2, 64.5, 61.6, 57.6, 52.51, 48.3, 48.3, 21.0. **ESI-HRMS** calculated for C<sub>16</sub>H<sub>20</sub>NO<sub>6</sub> (M+H)<sup>+</sup>: 322,1285 ; found: 322.1277.

**Methyl (3*S*,3*aR*,4*S*,6*R*,6*aS*)-6-(2-hydroxy-5-methylphenyl)-3-methoxy-1-oxohexahydro-1*H*-furo[3,4-*c*]pyrrole-4-carboxylate (4d):**

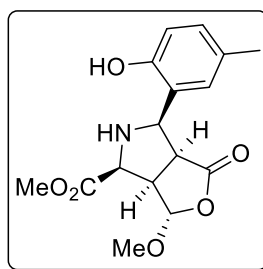

The reaction of methyl (*E*)-2-((2-hydroxy-5-methylbenzylidene)amino)acetate (**1d**) (20.7 mg, 0.1 mmol), 5-methoxy-2(5*H*)-furanone ((**±**)-**2a**) (11.4 mg, 0.1 mmol), and Takemoto's catalyst **3a** (8.2 mg, 20 mol%) in *p*-xylene (0.3 mL, [0.33]M) following the general procedure **GP3** and purification by flash column chromatography (Cy:EtOAc = 40:60), yielded de compound **4d** as a white solid (15.4 mg, 48% yield) and (**–**)-**2a** as a colorless oil (4.7 mg, 41% yield).

The enantiomeric excess for **4d** was determined by SFC on a *Daicel Chiralpak* IA column: CO<sub>2</sub>/MeOH gradient from 95:5 to 60:40 in 8 min, flow rate 3 mL/min,  $\lambda$  = 210 nm,  $\tau_{\text{minor}}$  = 5.04 min,  $\tau_{\text{major}}$  = 5.71 min (98% ee).  $[\alpha]^{20}_{\text{D}}$  = 0.520 (*c* = 0.4, CHCl<sub>3</sub>). The enantiomeric excess for (**–**)-**2a** was determined by SFC on a *Daicel Chiralpak* ID column: CO<sub>2</sub>/MeOH (95:5), flow rate 2 mL/min,  $\lambda$  = 210 nm,  $\tau_{\text{minor}}$  = 1.12 min,  $\tau_{\text{major}}$  = 0.87 min (86% ee). **c** = 47%, **s** > 200 (Calculated as *s* = 276).

**<sup>1</sup>H NMR** (300 MHz, CD<sub>2</sub>Cl<sub>2</sub>)  $\delta$ : 9.63 (brs, 1H), 7.01 (dd, *J* = 8.3, 2.3 Hz, 1H), 6.88 (d, *J* = 2.2 Hz, 1H), 6.67 (d, *J* = 8.2 Hz, 1H), 5.21 (d, *J* = 3.2 Hz, 1H), 4.52 (d, *J* = 9.1 Hz, 1H), 4.08 (d, *J* = 7.1 Hz, 1H), 3.84 (s, 3H), 3.49 (s, 3H), 3.40 (t, *J* = 9.2 Hz, 1H), 3.26 – 3.20 (m, 1H), 2.94 (brs, 1H), 2.26 (s, 3H). **<sup>13</sup>C NMR** (75 MHz, CD<sub>2</sub>Cl<sub>2</sub>)  $\delta$ : 172.5, 169.84, 155.3, 130.2, 129.4, 128.6, 119.2, 116.8, 106.3, 64.7, 61.6, 57.5, 52.5, 48.3, 48.2, 20.2. **ESI-HRMS** calculated for C<sub>16</sub>H<sub>20</sub>NO<sub>6</sub> (M+H)<sup>+</sup>: 322,1285; found: 322.1261.

**Methyl (3S,3aR,4S,6R,6aS)-6-(2-hydroxy-4-methoxyphenyl)-3-methoxy-1-oxohexahydro-1H-furo[3,4-c]pyrrole-4-carboxylate (4e):**

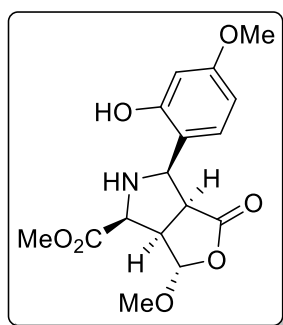

The reaction of methyl (*E*)-2-((2-hydroxy-4-methoxybenzylidene)amino)acetate (**1e**) (22.3 mg, 0.1 mmol), 5-methoxy-2(5*H*)-furanone (( $\pm$ )-**2a**) (11.4 mg, 0.1 mmol), and Takemoto's catalyst **3a** (8.2 mg, 20 mol%) in *p*-xylene (0.3 mL, [0.33]M) following the general procedure **GP3** and purification by flash column chromatography (Cy:EtOAc = 40:60), yielded de compound **4e** as a white solid (15.8 mg, 47% yield) and ( $-$ )-**2a** as a colorless oil (5.1 mg, 45% yield).

The enantiomeric excess for **4e** was determined by SFC on a *Daicel Chiralpak* IB-3 column: CO<sub>2</sub>/MeOH gradient from 95:5 to 60:30 in 8 min, flow rate 2 mL/min,  $\lambda$  = 210

nm,  $\tau_{\text{minor}}$  = 4.12 min,  $\tau_{\text{major}}$  = 4.37 min (97% ee).  $[\alpha]^{20}_{\text{D}}$  = 0.538 (*c* = 0.36, CHCl<sub>3</sub>). The enantiomeric excess for ( $-$ )-**2a** was determined by SFC on a *Daicel Chiralpak* ID column: CO<sub>2</sub>/MeOH (95:5), flow rate 2 mL/min,  $\lambda$  = 210 nm,  $\tau_{\text{minor}}$  = 1.07 min,  $\tau_{\text{major}}$  = 0.85 min (90% ee). **c** = 48%, **s** > 200 (Calculated as *s* = 204).

**<sup>1</sup>H NMR** (300 MHz, CD<sub>3</sub>CN)  $\delta$ : 10.44 (brs, 1H), 6.97 (d, *J* = 8.4 Hz, 1H), 6.35 (dd, *J* = 8.4, 2.5 Hz, 1H), 6.25 (d, *J* = 2.6 Hz, 1H), 5.17 (d, *J* = 3.3 Hz, 1H), 4.55 (d, *J* = 9.3 Hz, 1H), 4.05 (d, *J* = 7.2 Hz, 1H), 3.77 (s, 3H), 3.71 (s, 3H), 3.43 (s, 3H), 3.41 (t, *J* = 9.2 Hz, 1H), 3.58 – 3.26 (brs, 1H), 3.19 – 3.13 (m, 1H). **<sup>13</sup>C NMR** (75 MHz, CD<sub>3</sub>CN)  $\delta$ : 174.0, 171.4, 161.64, 159.9, 130.7, 114.2, 107.2, 105.3, 102.8, 64.2, 62.0, 57.9, 55.8, 53.0, 49.3, 49.0. **ESI-HRMS** calculated for C<sub>16</sub>H<sub>20</sub>NO<sub>7</sub> (*M*+*H*)<sup>+</sup>: 338.1234; found: 338.1252.

**Methyl (3S,3aR,4S,6R,6aS)-6-(2-hydroxy-3-methoxyphenyl)-3-methoxy-1-oxohexahydro-1H-furo[3,4-c]pyrrole-4-carboxylate (4f):**

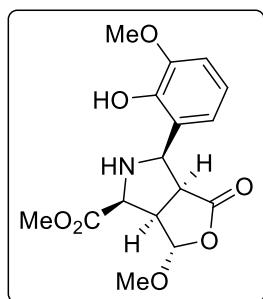

The reaction of methyl (*E*)-2-((2-hydroxy-3-methoxybenzylidene)amino)acetate (**1f**) (22.3 mg, 0.1 mmol), 5-methoxy-2(5*H*)-furanone (( $\pm$ )-**2a**) (11.4 mg, 0.1 mmol), and Takemoto's catalyst **3a** (8.2 mg, 20 mol%) in *p*-xylene (0.3 mL, [0.33]M) following the general procedure **GP3** and purification by flash column chromatography (Cy:EtOAc = 40:60), yielded de compound **4f** as a white solid (16.2 mg, 48% yield) and ( $-$ )-**2a** as a colorless oil (5.0 mg, 44% yield).

The enantiomeric excess for **4f** was determined by SFC on a *Daicel Chiralpak* IA column:

CO<sub>2</sub>/MeOH gradient from 95:5 to 60:40 in 8 min, flow rate 3 mL/min,  $\lambda$  = 210 nm,  $\tau_{\text{minor}}$  = 5.31 min,  $\tau_{\text{major}}$  = 5.57 min (94% ee).  $[\alpha]^{20}_{\text{D}}$  = 0.525 (*c* = 0.36, CHCl<sub>3</sub>). The enantiomeric excess for ( $-$ )-**2a** was determined by SFC on a *Daicel Chiralpak* ID column: CO<sub>2</sub>/MeOH (95:5), flow rate 2 mL/min,  $\lambda$  = 210 nm,  $\tau_{\text{minor}}$  = 1.17 min,  $\tau_{\text{major}}$  = 0.91 min (86% ee). **c** = 48%, **s** = 90.

**<sup>1</sup>H NMR** (300 MHz, CD<sub>3</sub>CN)  $\delta$ : 8.62 (brs, 1H), 6.99 – 6.61 (m, 3H), 5.16 (d, *J* = 3.1 Hz, 1H), 4.59 (d, *J* = 8.9 Hz, 1H), 4.05 (d, *J* = 7.2 Hz, 1H), 3.81 (s, 3H), 3.78 (s, 3H), 3.48 (t, *J* = 9.0 Hz, 1H), 3.15 (ddd, *J* = 9.1, 7.0, 3.1 Hz, 1H), 3.08 (s, 1H). **<sup>13</sup>C NMR** (76 MHz, CD<sub>3</sub>CN)  $\delta$ : 174.3, 171.7, 148.4, 146.5, 123.8, 120.9, 119.9, 112.1, 107.4, 62.3, 62.1, 57.9, 56.6, 52.9, 49.6, 48.6. **ESI-HRMS** calculated for C<sub>16</sub>H<sub>20</sub>NO<sub>7</sub> (*M*+*H*)<sup>+</sup>: 338.1234; found: 338.1216.

**Methyl (3*S*,3*aR*,4*S*,6*R*,6*aS*)-6-(4-(diethylamino)-2-hydroxyphenyl)-3-methoxy-1-oxohexahydro-1*H*-furo[3,4-*c*]pyrrole-4-carboxylate (4*g*):**

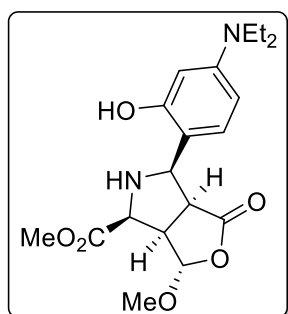

The reaction of methyl (*E*)-2-((2-hydroxybenzylidene)amino)acetate (**1g**) (19.32 mg, 0.1 mmol), 5-methoxy-2(5*H*)-furanone ((**±**)-**2a**) (11.4 mg, 0.1 mmol), and Takemoto's catalyst **3a** (8.2 mg, 20 mol%) in *p*-xylene (0.3 mL, [0.33]M) following the general procedure **GP3** and purification by flash column chromatography (Cy:EtOAc = 40:60), yielded de compound **4g** as a white solid (11.5 mg, 30% yield) and (**–**)-**2a** as a colorless oil (6.8 mg, 60% yield).

The enantiomeric excess for **4g** was determined by SFC on a *Daicel Chiralpak* IA column: CO<sub>2</sub>/MeOH gradient from 95:5 to 60:40 in 8 min, flow rate 3 mL/min, λ = 210 nm, τ<sub>minor</sub> = 5.10 min, τ<sub>major</sub> = 5.69 min (98% ee). [α]<sub>D</sub><sup>20</sup> = 0.230 (c = 0.22, CHCl<sub>3</sub>). The enantiomeric excess for (**–**)-**2a** was determined by SFC on a *Daicel Chiralpak* ID column: CO<sub>2</sub>/MeOH (95:5), flow rate 2 mL/min, λ = 210 nm, τ<sub>minor</sub> = 1.23 min, τ<sub>major</sub> = 0.95 min (34% ee). **c** = 25%, **s** = 170.

**<sup>1</sup>H NMR** (300 MHz, CDCl<sub>3</sub>) δ: 6.85 (d, *J* = 8.2 Hz, 1H), 6.26 – 6.10 (m, 2H), 5.26 (d, *J* = 3.3 Hz, 1H), 4.51 (d, *J* = 9.2 Hz, 1H), 4.03 (d, *J* = 6.8 Hz, 1H), 3.84 (s, 3H), 3.50 (s, 3H), 3.36 (t, *J* = 9.2 Hz, 1H), 3.30 (q, *J* = 7.0 Hz, 4H), 3.20 (ddd, *J* = 9.6, 6.8, 3.3 Hz, 1H), 1.14 (t, *J* = 7.0 Hz, 6H). **<sup>13</sup>C NMR** (75 MHz, CDCl<sub>3</sub>) δ: 172.6, 169.8, 158.6, 149.7, 129.7, 106.3, 105.7, 103.8, 100.4, 65.0, 61.6, 57.8, 52.6, 48.6, 48.4, 44.4, 12.8. **ESI-HRMS** calculated for C<sub>19</sub>H<sub>27</sub>N<sub>2</sub>O<sub>6</sub> (M+H)<sup>+</sup>: 379.1838; found: 379.1834.

**Methyl (3*S*,3*aR*,4*S*,6*R*,6*aS*)-6-(4-fluoro-2-hydroxyphenyl)-3-methoxy-1-oxohexahydro-1*H*-furo[3,4-*c*]pyrrole-4-carboxylate (4*h*):**

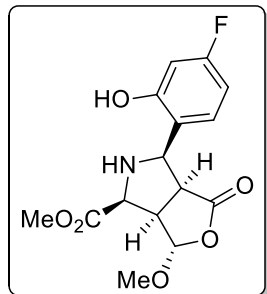

The reaction of methyl (*E*)-2-((4-fluoro-2-hydroxybenzylidene)amino)acetate (**1h**) (21.1 mg, 0.1 mmol), 5-methoxy-2(5*H*)-furanone ((**±**)-**2a**) (11.4 mg, 0.1 mmol), and Takemoto's catalyst **3a** (8.2 mg, 20 mol%) in *p*-xylene (0.3 mL, [0.33]M) following the general procedure **GP3** and purification by flash column chromatography (Cy:EtOAc = 40:60), yielded de compound **4h** as a white solid (14.6 mg, 45% yield) and (**–**)-**2a** as a colorless oil (5.0 mg, 44% yield).

The enantiomeric excess for **4h** was determined by SFC on a *Daicel Chiralpak* IA column: CO<sub>2</sub>/MeOH gradient from 95:5 to 60:40 in 8 min, flow rate 3 mL/min, λ = 210 nm, τ<sub>minor</sub> = 4.37 min, τ<sub>major</sub> = 5.00 min (82% ee). [α]<sub>D</sub><sup>20</sup> = 0.325 (c = 0.53, CHCl<sub>3</sub>). The enantiomeric excess for (**–**)-**2a** was determined by SFC on a *Daicel Chiralpak* ID column: CO<sub>2</sub>/MeOH (95:5), flow rate 2 mL/min, λ = 210 nm, τ<sub>minor</sub> = 1.19 min, τ<sub>major</sub> = 0.92 min (87% ee). **c** = 51%, **s** = 28.

**<sup>1</sup>H NMR** (300 MHz, CD<sub>3</sub>CN) δ: 10.83 (brs, 1H), 7.09 (dd, *J* = 8.6, 6.7 Hz, 1H), 6.54 (td, *J* = 8.6, 2.6 Hz, 1H), 6.46 (dd, *J* = 10.8, 2.6 Hz, 1H), 5.18 (d, *J* = 3.2 Hz, 1H), 4.62 (d, *J* = 9.3 Hz, 1H), 4.09 (d, *J* = 7.4 Hz, 1H), 3.78 (s, 3H), 3.47 (t, *J* = 9.3 Hz, 1H), 3.44 (s, 3H), 3.19 (ddd, *J* = 9.2, 7.4, 3.2 Hz, 1H). **<sup>13</sup>C NMR** (75 MHz, CD<sub>3</sub>CN) δ: 174.0, 171.3, 164.2 (d, *J* = 242.3), 160.3 (d, *J* = 12.4 Hz), 131.1 (d, *J* = 10.5 Hz), 107.2, 106.5 (d, *J* = 21.8 Hz), 104.3 (d, *J* = 24.2 Hz), 63.9, 62.0, 58.0, 53.0, 49.2, 48.9. **<sup>19</sup>F NMR** (471 MHz, CD<sub>3</sub>CN) δ: -115.4. **ESI-HRMS** calculated for C<sub>15</sub>H<sub>17</sub>FNO<sub>6</sub> (M+H)<sup>+</sup>: 326.1034; found: 326.1058.

**Methyl (3*S*,3*aR*,4*S*,6*R*,6*aS*)-6-(4-bromo-2-hydroxyphenyl)-3-methoxy-1-oxohexahydro-1*H*-furo[3,4-*c*]pyrrole-4-carboxylate (4*i*):**

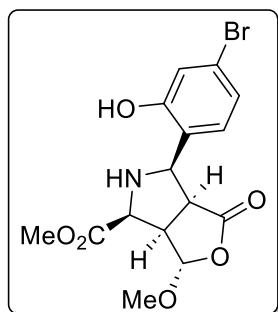

The reaction of methyl (*E*)-2-((4-bromo-2-hydroxybenzylidene)amino)acetate (**1i**) (27.2 mg, 0.1 mmol), 5-methoxy-2(5*H*)-furanone ((**±**)-**2a**) (11.4 mg, 0.1 mmol), and Takemoto's catalyst **3a** (8.2 mg, 20 mol%) in *p*-xylene (0.3 mL, [0.33]M) following the general procedure **GP3** and purification by flash column chromatography (Cy:EtOAc = 40:60), yielded de compound **4i** as a white solid (15.4 mg, 40% yield) and (**–**)-**2a** as a colorless oil (5.0 mg, 44% yield).

The enantiomeric excess for **4i** was determined by SFC on a *Daicel Chiralpak* IA column: CO<sub>2</sub>/MeOH gradient from 95:5 to 60:40 in 8 min, flow rate 2 mL/min, λ = 210 nm, τ<sub>minor</sub> = 7.13 min, τ<sub>major</sub> = 7.65 min (95% ee). [α]<sup>20</sup><sub>D</sub> = 0.495 (c = 0.4, CHCl<sub>3</sub>). The enantiomeric excess for (**–**)-**2a** was determined by SFC on a *Daicel Chiralpak* ID column: CO<sub>2</sub>/MeOH (95:5), flow rate 2 mL/min, λ = 210 nm, τ<sub>minor</sub> = 1.22 min, τ<sub>major</sub> = 0.94 min (68% ee). **c** = 41%, **s** = 80.

**<sup>1</sup>H NMR** (300 MHz, (CD<sub>3</sub>)<sub>2</sub>SO) δ: 10.30 (s, 1H), 7.18 (d, *J* = 7.9 Hz, 1H), 6.94 – 6.88 (m, 2H), 5.06 (d, *J* = 2.8 Hz, 1H), 4.42 (dd, *J* = 8.5, 4.5 Hz, 1H), 4.00 (dd, *J* = 6.9, 4.7 Hz, 1H), 3.74 (s, 3H), 3.61 – 3.53 (m, 1H), 3.49 (t, *J* = 8.6 Hz, 1H), 3.36 (s, 3H), 3.18 – 3.04 (m, 1H). **<sup>13</sup>C NMR** (75 MHz, (CD<sub>3</sub>)<sub>2</sub>SO) δ: 173.3, 170.7, 156.3, 128.9, 124.3, 121.2, 120.1, 117.1, 106.0, 61.0, 58.6, 56.7, 51.9, 48.1, 46.6. **ESI-HRMS** calculated for C<sub>15</sub>H<sub>17</sub>BrNO<sub>6</sub> (M+H)<sup>+</sup>: 386.0234 and 388.0214; found: 386.0250 and 388.0231.

**Methyl (3*S*,3*aR*,4*S*,6*R*,6*aS*)-6-(5-chloro-2-hydroxyphenyl)-3-methoxy-1-oxohexahydro-1*H*-furo[3,4-*c*]pyrrole-4-carboxylate (4*j*):**

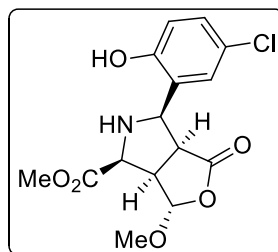

The reaction of methyl (*E*)-2-((5-chloro-2-hydroxybenzylidene)amino)acetate (**1j**) (22.7 mg, 0.1 mmol), 5-methoxy-2(5*H*)-furanone ((**±**)-**2a**) (11.4 mg, 0.1 mmol), and Takemoto's catalyst **3a** (8.2 mg, 20 mol%) in *p*-xylene (0.3 mL, [0.33]M) following the general procedure **GP3** and purification by flash column chromatography (Cy:EtOAc = 40:60), yielded de compound **4j** as a white solid (12.6 mg, 35% yield) and (**–**)-**2a** as a colorless oil (4.4 mg, 39% yield).

The enantiomeric excess for **4j** was determined by SFC on a *Daicel Chiralpak* IA column: CO<sub>2</sub>/MeOH gradient from 95:5 to 60:40 in 8 min, flow rate 2 mL/min, λ = 210 nm, τ<sub>minor</sub> = 7.06 min, τ<sub>major</sub> = 7.43 min (93% ee). [α]<sup>20</sup><sub>D</sub> = 0.355 (c = 0.32, CHCl<sub>3</sub>). The enantiomeric excess for (**–**)-**2a** was determined by SFC on a *Daicel Chiralpak* ID column: CO<sub>2</sub>/MeOH (95:5), flow rate 2 mL/min, λ = 210 nm, τ<sub>minor</sub> = 1.19 min, τ<sub>major</sub> = 0.92 min (56% ee). **c** = 37%, **s** = 49.

**<sup>1</sup>H NMR** (300 MHz, CD<sub>3</sub>CN) δ: 10.29 (brs, 1H), 7.17 – 7.08 (m, 2H), 6.69 (d, *J* = 8.4 Hz, 1H), 5.18 (d, *J* = 3.2 Hz, 1H), 4.58 (d, *J* = 9.2 Hz, 1H), 4.10 (d, *J* = 7.3 Hz, 1H), 3.79 (s, 3H), 3.51 (t, *J* = 9.2 Hz, 1H), 3.44 (s, 3H), 3.19 (ddd, *J* = 9.0, 7.2, 3.1 Hz, 1H). **<sup>13</sup>C NMR** (75 MHz, CD<sub>2</sub>Cl<sub>2</sub>) δ: 172.3, 169.6, 156.5, 129.5, 128.5, 123.9, 121.3, 118.6, 106.2, 67.8, 64.0, 61.6, 57.6, 52.6, 48.2. **ESI-HRMS** calculated for C<sub>15</sub>H<sub>17</sub>ClNO<sub>6</sub> (M+H)<sup>+</sup>: 342.0739 and 344.0710; found: 342.0763 and 344.0759.

**Methyl (3*S*,3*aR*,4*S*,6*R*,6*aS*)-6-(2-hydroxy-5-nitrophenyl)-3-methoxy-1-oxohexahydro-1*H*-furo[3,4-*c*]pyrrole-4-carboxylate (4k):**

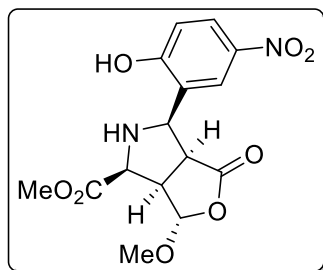

The reaction of methyl (*E*)-2-((2-hydroxy-5-nitrobenzylidene)amino)acetate (**1k**) (23.8 mg, 0.1 mmol), 5-methoxy-2(5*H*)-furanone ((±)-**2a**) (11.4 mg, 0.1 mmol), and Takemoto's catalyst **3a** (8.2 mg, 20 mol%) in *p*-xylene (0.3 mL, [0.33]M) following the general procedure **GP3** and purification by flash column chromatography (Cy:EtOAc = 40:60), yielded de compound **4k** as a white solid (16.5 mg, 47% yield) and (–)-**2a** as a colorless oil (4.6 mg, 40% yield).

The enantiomeric excess for **4k** was determined by SFC on a *Daicel Chiralpak* IA column: CO<sub>2</sub>/MeOH gradient from 95:5 to 60:40 in 8 min, flow rate 2 mL/min, λ = 210 nm, τ<sub>minor</sub> = 7.01 min, τ<sub>major</sub> = 7.26 min (95% ee). [α]<sub>D</sub><sup>20</sup> = 0.450 (c = 0.65, CHCl<sub>3</sub>). The enantiomeric excess for (–)-**2a** was determined by SFC on a *Daicel Chiralpak* ID column: CO<sub>2</sub>/MeOH (95:5), flow rate 2 mL/min, λ = 210 nm, τ<sub>minor</sub> = 1.17 min, τ<sub>major</sub> = 0.91 min (90% ee). **c** = 49%, **s** = 120.

**<sup>1</sup>H NMR** (300 MHz, CD<sub>3</sub>CN) δ: 11.55 (brs, 1H), 8.09 (d, *J* = 2.8 Hz, 1H), 8.05 (dd, *J* = 8.9, 2.8 Hz, 1H), 6.84 (d, *J* = 8.9 Hz, 1H), 5.19 (d, *J* = 2.9 Hz, 1H), 4.74 (d, *J* = 9.1 Hz, 1H), 4.17 (d, *J* = 7.7 Hz, 1H), 3.80 (s, 3H), 3.60 (t, *J* = 9.2 Hz, 1H), 3.44 (s, 3H), 3.24 (ddd, *J* = 9.2, 7.7, 3.0 Hz, 1H). **<sup>13</sup>C NMR** (75 MHz, CD<sub>3</sub>CN) δ: 174.0, 171.3, 164.9, 141.2, 126.2, 125.8, 123.3, 117.7, 107.2, 63.1, 62.1, 58.0, 53.1, 49.0, 48.7. **ESI-HRMS** calculated for C<sub>15</sub>H<sub>17</sub>N<sub>2</sub>O<sub>8</sub> (M+H)<sup>+</sup>: 353.0979; found: 353.0991.

**Methyl (3*S*,3*aR*,4*S*,6*R*,6*aS*)-6-(2-hydroxy-5-(methoxycarbonyl)phenyl)-3-methoxy-1-oxohexahydro-1*H*-furo[3,4-*c*]pyrrole-4-carboxylate (4l):**

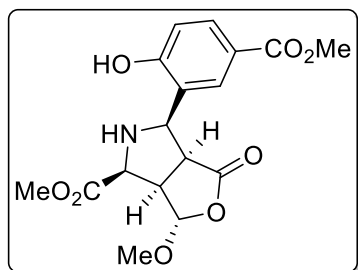

The reaction of methyl (*E*)-4-hydroxy-3-(((2-methoxy-2-oxoethyl)imino)methyl)benzoate (**1l**) (25.1 mg, 0.1 mmol), 5-methoxy-2(5*H*)-furanone ((±)-**2a**) (11.4 mg, 0.1 mmol), and Takemoto's catalyst **3a** (8.2 mg, 20 mol%) in *p*-xylene (0.3 mL, [0.33]M) following the general procedure **GP3** and purification by flash column chromatography (Cy:EtOAc = 40:60), yielded de compound **4l** as a white solid (12.8 mg, 35% yield) and (–)-**2a** as a colorless oil (6.2 mg, 54% yield).

The enantiomeric excess for **4l** was determined by SFC on a *Daicel Chiralpak* IA column: CO<sub>2</sub>/MeOH gradient from 95:5 to 60:40 in 8 min, flow rate 3 mL/min, λ = 210 nm, τ<sub>minor</sub> = 5.08 min, τ<sub>major</sub> = 5.54 min (91% ee). [α]<sub>D</sub><sup>20</sup> = 0.450 (c = 0.65, CHCl<sub>3</sub>). The enantiomeric excess for (–)-**2a** was determined by SFC on a *Daicel Chiralpak* ID column: CO<sub>2</sub>/MeOH (95:5), flow rate 2 mL/min, λ = 210 nm, τ<sub>minor</sub> = 1.26 min, τ<sub>major</sub> = 0.97 min (56% ee). **c** = 38%, **s** = 37.

**<sup>1</sup>H NMR** (300 MHz, (CD<sub>3</sub>)<sub>2</sub>SO) δ: 10.74 (s, 1H), 7.91 (d, *J* = 2.3 Hz, 1H), 7.72 (dd, *J* = 8.4, 2.3 Hz, 1H), 6.84 (d, *J* = 8.4 Hz, 1H), 5.08 (d, *J* = 2.6 Hz, 1H), 4.46 (dd, *J* = 8.4, 3.5 Hz, 1H), 4.03 (dd, *J* = 7.1, 3.9 Hz, 1H), 3.79 (s, 3H), 3.76 (s, 3H), 3.65 – 3.58 (m, 1H), 3.54 (t, *J* = 8.6 Hz, 1H), 3.36 (s, 3H), 3.12 (ddd, *J* = 9.2, 6.9, 2.6 Hz, 1H). **<sup>13</sup>C NMR** (75 MHz, (CD<sub>3</sub>)<sub>2</sub>SO) δ: 173.4, 170.8, 166.3, 159.8, 130.0, 128.6, 125.1, 119.8, 114.5, 106.1, 61.1, 58.6, 56.6, 51.9, 51.5, 47.9, 46.5. **ESI-HRMS** calculated for C<sub>17</sub>H<sub>20</sub>NO<sub>8</sub> (M+H)<sup>+</sup>: 366.1183; found: 366.1159.

**Methyl (3S,3aR,4S,6R,6aS)-6-(2-hydroxynaphthalen-1-yl)-3-methoxy-1-oxohexahydro-1H-furo[3,4-c]pyrrole-4-carboxylate (4m):**

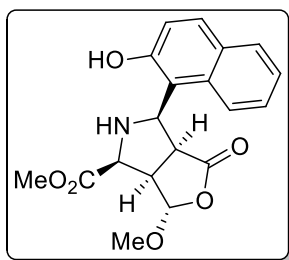

The reaction of methyl (*E*)-2-(((2-hydroxynaphthalen-1-yl)methylene)amino)acetate (**1m**) (24.3 mg, 0.1 mmol), 5-methoxy-2(5*H*)-furanone (( $\pm$ )-**2a**) (11.4 mg, 0.1 mmol), and Takemoto's catalyst **3a** (8.2 mg, 20 mol%) in *p*-xylene (0.3 mL, [0.33]M) following the general procedure **GP3**, but at 50 °C for two days, and purification by flash column chromatography (Cy:EtOAc = 40:60), yielded de compound **4m** as an orange solid (16.4 mg, 46% yield) and (*–*)-**2a** as a colorless oil (5.1 mg, 45% yield).

The enantiomeric excess for **4m** was determined by SFC on a *Daicel Chiralpak* IB-3 column: CO<sub>2</sub>/MeOH gradient from 95:5 to 70:30 in 8 min, flow rate 2 mL/min,  $\lambda$  = 210 nm,  $\tau_{\text{minor}}$  = 6.05 min,  $\tau_{\text{major}}$  = 6.47 min (93% ee).  $[\alpha]_{\text{D}}^{20}$  = 0.152 (*c* = 0.2, CHCl<sub>3</sub>). The enantiomeric excess for (*–*)-**2a** was determined by SFC on a *Daicel Chiralpak* ID column: CO<sub>2</sub>/MeOH (95:5), flow rate 2 mL/min,  $\lambda$  = 210 nm,  $\tau_{\text{minor}}$  = 1.12,  $\tau_{\text{major}}$  = 0.94 min (91% ee). **c** = 50%, **s** = 88.

**<sup>1</sup>H NMR** (300 MHz, CD<sub>3</sub>CN)  $\delta$ : 12.1 (brs, 1H) 7.94 – 7.64 (m, 3H), 7.56 – 7.42 (m, 1H), 7.41 – 7.23 (m, 1H), 6.95 (d, *J* = 8.9 Hz, 1H), 5.41 (d, *J* = 9.5 Hz, 1H), 5.28 (d, *J* = 3.4 Hz, 1H), 4.21 (d, *J* = 7.6 Hz, 1H), 3.81 (s, 3H), 3.73 (t, *J* = 9.4 Hz, 1H), 3.45 (s, 3H), 3.37 – 3.25 (m, 1H). **<sup>13</sup>C NMR** (75 MHz, CD<sub>3</sub>CN)  $\delta$ : 173.7, 171.3, 157.9, 133.7, 130.8, 129.7, 129.3, 127.8, 123.7, 122.2, 120.8, 111.6, 107.2, 62.0, 60.8, 58.0, 53.1, 49.5, 48.1. **ESI-HRMS** calculated for C<sub>19</sub>H<sub>20</sub>NO<sub>6</sub> (M+H)<sup>+</sup>: 358,1285; found: 358.1299.

**Methyl (3S,3aR,4S,6R,6aS)-6-(3-hydroxynaphthalen-2-yl)-3-methoxy-1-oxohexahydro-1H-furo[3,4-c]pyrrole-4-carboxylate (4n):**

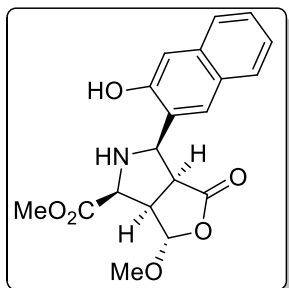

The reaction of methyl (*E*)-2-(((3-hydroxynaphthalen-2-yl)methylene)amino)acetate (**1n**) (24.3 mg, 0.1 mmol), 5-methoxy-2(5*H*)-furanone (( $\pm$ )-**2a**) (11.4 mg, 0.1 mmol), and Takemoto's catalyst **3a** (8.2 mg, 20 mol%) in *p*-xylene (0.3 mL, [0.33]M) following the general procedure **GP3**, but at 50 °C for two days, and purification by flash column chromatography (Cy:EtOAc = 40:60), yielded de compound **4n** as an orange solid (11.8 mg, 33% yield) and (*–*)-**2a** as a colorless oil (5.6 mg, 49% yield).

The enantiomeric excess for **4n** was determined by SFC on a *Daicel Chiralpak* IB-3 column: CO<sub>2</sub>/MeOH gradient from 95:5 to 70:30 in 8 min, flow rate 2 mL/min,  $\lambda$  = 210 nm,  $\tau_{\text{minor}}$  = 6.09 min,  $\tau_{\text{major}}$  = 6.49 min (97% ee).  $[\alpha]_{\text{D}}^{20}$  = 0.187 (*c* = 0.2, CHCl<sub>3</sub>). The enantiomeric excess for (*–*)-**2a** was determined by SFC on a *Daicel Chiralpak* ID column: CO<sub>2</sub>/MeOH (95:5), flow rate 2 mL/min,  $\lambda$  = 210 nm,  $\tau_{\text{minor}}$  = 1.20,  $\tau_{\text{major}}$  = 0.93 min (33% ee). **c** = 25%, **s** = 91.

**<sup>1</sup>H NMR** (300 MHz, CD<sub>3</sub>CN)  $\delta$ : 12.11 (brs, 1H), 7.87 – 7.74 (m, 2H), 7.70 (d, *J* = 8.9 Hz, 1H), 7.49 (dd, *J* = 8.6, 6.9 Hz, 1H), 7.32 (t, *J* = 7.5 Hz, 1H), 6.97 (dd, *J* = 8.9, 1.8 Hz, 1H), 5.43 (d, *J* = 9.5 Hz, 1H), 5.29 (d, *J* = 3.3 Hz, 1H), 4.22 (d, *J* = 7.3 Hz, 1H), 3.82 (s, 3H), 3.75 (t, *J* = 9.4 Hz, 1H), 3.46 (s, 3H), 3.33 – 3.26 (m, 1H). **<sup>13</sup>C NMR** (75 MHz, CD<sub>3</sub>CN)  $\delta$ : 173.7, 171.3, 157.9, 133.7, 130.8, 129.6, 129.3, 127.8, 123.7, 122.1, 120.8, 111.5, 107.2, 62.0, 60.8, 58.4, 53.1, 49.5, 48.1. **ESI-HRMS** calculated for C<sub>19</sub>H<sub>20</sub>NO<sub>6</sub> (M+H)<sup>+</sup>: 358,1285; found: 358.1273.

**Methyl (3*S*,3*aR*,4*S*,6*R*,6*aS*)-6-(2-hydroxyphenyl)-3-methoxy-4-methyl-1-oxohexahydro-1*H*-furo[3,4-*c*]pyrrole-4-carboxylate (4o):**

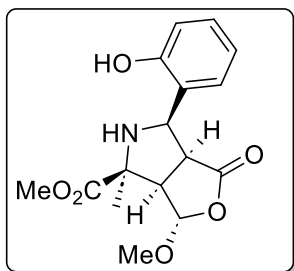

The reaction of methyl (*E*)-2-((2-hydroxybenzylidene)amino)propanoate (**1o**) (20.7 mg, 0.1 mmol), 5-methoxy-2(5*H*)-furanone ((**±**)-**2a**) (11.4 mg, 0.1 mmol), and Takemoto's catalyst **3a** (8.2 mg, 20 mol%) in *p*-xylene (0.3 mL, [0.33]M) following the general procedure **GP3** and purification by flash column chromatography (Cy:EtOAc = 40:60), yielded de compound **4o** as a white solid (14.8 mg, 46% yield) and (**–**)-**2a** as a colorless oil (5.3 mg, 47% yield).

The enantiomeric excess for **4o** was determined by SFC on a *Daicel Chiralpak* IA column: CO<sub>2</sub>/MeOH gradient from 95:5 to 60:40 in 8 min, flow rate 3 mL/min, λ = 210 nm, τ<sub>minor</sub> = 4.01 min, τ<sub>major</sub> = 4.97 min (87% ee). [α]<sub>D</sub><sup>20</sup> = 0.523 (c = 0.47, CHCl<sub>3</sub>). The enantiomeric excess for (**–**)-**2a** was determined by SFC on a *Daicel Chiralpak* ID column: CO<sub>2</sub>/MeOH (95:5), flow rate 2 mL/min, λ = 210 nm, τ<sub>minor</sub> = 1.19 min, τ<sub>major</sub> = 0.94 min (91% ee). **c** = 51%, **s** = 45.

**<sup>1</sup>H NMR** (300 MHz, CDCl<sub>3</sub>) δ: 7.20 (td, *J* = 7.7, 1.7 Hz, 1H), 7.04 (dd, *J* = 7.7, 1.7 Hz, 1H), 6.88 – 6.80 (m, 2H), 5.19 (d, *J* = 3.8 Hz, 1H), 4.85 (d, *J* = 9.6 Hz, 1H), 3.84 (s, 3H), 3.57–3.47 (m, 1H), 3.49 (s, 3H), 2.94 (dd, *J* = 9.1, 3.6 Hz, 1H), 1.58 (s, 3H). **<sup>13</sup>C NMR** (75 MHz, CDCl<sub>3</sub>) δ: 172.7, 172.2, 157.7, 130.2, 129.2, 119.9, 119.4, 117.8, 107.1, 67.4, 62.4, 58.1, 55.6, 53.0, 48.4, 24.6. **ESI-HRMS** calculated for C<sub>16</sub>H<sub>20</sub>NO<sub>6</sub> (M+H)<sup>+</sup>: 322.1285; found: 322.1299.

**Methyl (3*S*,3*aR*,4*R*,6*R*,6*aS*)-6-(2-hydroxyphenyl)-3-methoxy-1-oxo-4-phenylhexahydro-1*H*-furo[3,4-*c*]pyrrole-4-carboxylate (4p):**

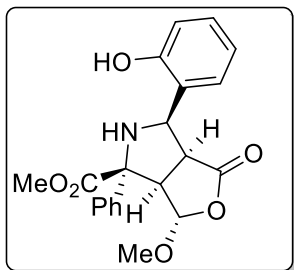

The reaction of methyl (*E*)-2-((2-hydroxybenzylidene)amino)-2-phenylacetate (**1p**) (26.9 mg, 0.1 mmol), 5-methoxy-2(5*H*)-furanone ((**±**)-**2a**) (11.4 mg, 0.1 mmol), and Takemoto's catalyst **3a** (8.2 mg, 20 mol%) in *p*-xylene (0.3 mL, [0.33]M) following the general procedure **GP3** and purification by flash column chromatography (Cy:EtOAc = 40:60), yielded de compound **4p** as a white solid (13.8 mg, 36% yield) and (**–**)-**2a** as a colorless oil (5.5 mg, 48% yield).

The enantiomeric excess for **4p** was determined by SFC on a *Daicel Chiralpak* ID column: CO<sub>2</sub>/MeOH gradient from 95:5 to 60:40 in 8 min, flow rate 2 mL/min, λ = 210 nm, τ<sub>minor</sub> = 3.60 min, τ<sub>major</sub> = 3.87 min (71% ee). [α]<sub>D</sub><sup>20</sup> = 0.195 (c = 0.4, CHCl<sub>3</sub>). The enantiomeric excess for (**–**)-**2a** was determined by SFC on a *Daicel Chiralpak* ID column: CO<sub>2</sub>/MeOH (95:5), flow rate 2 mL/min, λ = 210 nm, τ<sub>minor</sub> = 1.21 min, τ<sub>major</sub> = 0.93 min (65% ee). **c** = 48%, **s** = 11.

**<sup>1</sup>H NMR** (300 MHz, CDCl<sub>3</sub>) δ: 9.72 (brs, 1H), 7.48 – 7.44 (m, 5H), 7.19 (t, *J* = 7.8 Hz, 1H), 6.97 (d, *J* = 7.4 Hz, 1H), 6.89 – 6.78 (m, 2H), 5.35 (d, *J* = 3.6 Hz, 1H), 4.41 (d, *J* = 9.7 Hz, 1H), 3.77 (s, 3H), 3.69 (dd, *J* = 8.9, 3.6 Hz, 1H), 3.58 (s, 3H), 3.46 – 3.34 (m, 1H). **<sup>13</sup>C NMR** (75 MHz, CDCl<sub>3</sub>) δ: 172.5, 170.9, 157.2, 137.6, 130.1, 129.6, 129.2, 129.1, 125.4, 119.9, 119.4, 117.6, 107.7, 73.3, 61.7, 58.2, 53.7, 53.1, 48.8. **ESI-HRMS** calculated for C<sub>21</sub>H<sub>22</sub>NO<sub>6</sub> (M+H)<sup>+</sup>: 384.1442; found: 384.1472.

**(3*S*,3*aR*,4*S*,6*R*,6*aS*)-6-(2-hydroxyphenyl)-3-methoxy-*N,N*-dimethyl-1-oxohexahydro-1*H*-furo[3,4-*c*]pyrrole-4-carboxamide (**4q**):**

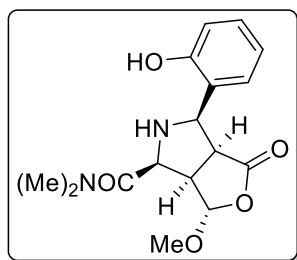

The reaction of (*E*)-2-((2-hydroxybenzylidene)amino)-*N,N*-dimethylacetamide (**1q**) (20.6 mg, 0.1 mmol), 5-methoxy-2(5*H*)-furanone (**(±)-2a**) (11.4 mg, 0.1 mmol), and Takemoto's catalyst **3a** (8.2 mg, 20 mol%) in *p*-xylene (0.3 mL, [0.33]M) following the general procedure **GP3** and purification by flash column chromatography (Cy:EtOAc = 40:60), yielded de compound **4q** as a white solid (14.1 mg, 44% yield) and (*−*)-**2a** as a colorless oil (5.2 mg, 46% yield).

The enantiomeric excess for **4q** was determined by SFC on a *Daicel Chiralpak* ID column: CO<sub>2</sub>/MeOH gradient from 95:5 to 60:40 in 8 min, flow rate 2 mL/min, λ = 210 nm, τ<sub>minor</sub> = 4.48 min, τ<sub>major</sub> = 4.97 min (84% ee). [α]<sub>D</sub><sup>20</sup> = 0.154 (c = 0.32, CHCl<sub>3</sub>). The enantiomeric excess for (*−*)-**2a** was determined by SFC on a *Daicel Chiralpak* ID column: CO<sub>2</sub>/MeOH (95:5), flow rate 2 mL/min, λ = 210 nm, τ<sub>minor</sub> = 1.26 min, τ<sub>major</sub> = 0.96 min (82% ee). **c = 49%, s = 29.**

**<sup>1</sup>H NMR** (300 MHz, (CD<sub>3</sub>)<sub>2</sub>SO) δ: 10.24 (s, 1H), 7.20 – 6.94 (m, 2H), 6.78 – 6.69 (m, 2H), 5.06 (d, *J* = 3.2 Hz, 1H), 4.41 (t, *J* = 8.9 Hz, 1H), 4.22 (t, *J* = 7.3 Hz, 1H), 3.63 – 3.54 (m, 1H), 3.49 (t, *J* = 8.9 Hz, 1H), 3.34 (s, 3H), 3.27 – 3.18 (m, 1H), 3.06 (s, 3H), 2.93 (s, 3H). **<sup>13</sup>C NMR** (75 MHz, (CD<sub>3</sub>)<sub>2</sub>SO) δ: 173.6, 168.9, 155.9, 128.2 (2C), 122.9, 118.5, 115.2, 105.4, 61.9, 59.8, 56.9, 49.4, 49.1, 35.9, 35.2. **ESI-HRMS** calculated for C<sub>16</sub>H<sub>21</sub>N<sub>2</sub>O<sub>5</sub> (M+H)<sup>+</sup>: 321.1445; found: 321.1439.

**Ethyl (3*S*,3*aR*,4*S*,6*R*,6*aS*)-6-(2-hydroxyphenyl)-3-methoxy-1-oxohexahydro-1*H*-furo[3,4-*c*]pyrrole-4-carboxylate (**4r**):**

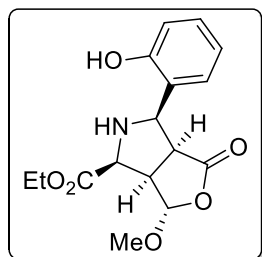

The reaction of ethyl (*E*)-2-((2-hydroxybenzylidene)amino)acetate (**1r**) (20.7 mg, 0.1 mmol), 5-methoxy-2(5*H*)-furanone (**(±)-2a**) (11.4 mg, 0.1 mmol), and Takemoto's catalyst **3a** (8.2 mg, 20 mol%) in *p*-xylene (0.3 mL, [0.33]M) following the general procedure **GP3** and purification by flash column chromatography (Cy:EtOAc = 40:60), yielded de compound **4r** as a white solid (15.1 mg, 47% yield) and (*−*)-**2a** as a colorless oil (5.0 mg, 44% yield).

The enantiomeric excess for **4r** was determined by SFC on a *Daicel Chiralpak* IA column: CO<sub>2</sub>/MeOH gradient from 95:5 to 60:40 in 8 min, flow rate 3 mL/min, λ = 210 nm, τ<sub>minor</sub> = 4.94 min, τ<sub>major</sub> = 5.65 min (93% ee). [α]<sub>D</sub><sup>20</sup> = 0.383 (c = 0.37, CHCl<sub>3</sub>). The enantiomeric excess for (*−*)-**2a** was determined by SFC on a *Daicel Chiralpak* ID column: CO<sub>2</sub>/MeOH (95:5), flow rate 2 mL/min, λ = 210 nm, τ<sub>minor</sub> = 1.23 min, τ<sub>major</sub> = 0.95 min (87% ee). **c = 48%, s = 80.**

**<sup>1</sup>H NMR** (300 MHz, CD<sub>2</sub>Cl<sub>2</sub>) δ: 9.92 (brs, 1H), 7.19 (ddd, *J* = 8.0, 7.3, 1.7 Hz, 1H), 7.06 (dd, *J* = 7.6, 1.8 Hz, 1H), 6.83 (td, *J* = 7.4, 1.2 Hz, 1H), 6.77 (dd, *J* = 8.1, 1.3 Hz, 1H), 5.23 (d, *J* = 3.2 Hz, 1H), 4.57 (d, *J* = 9.1 Hz, 1H), 4.43 – 4.18 (m, 2H), 4.06 (d, *J* = 7.1 Hz, 1H), 3.48 (s, 3H), 3.41 (t, *J* = 9.3 Hz, 1H), 3.23 (ddd, *J* = 9.2, 7.1, 3.2 Hz, 1H), 2.98 (brs, 1H), 1.33 (t, *J* = 7.2 Hz, 3H). **<sup>13</sup>C NMR** (75 MHz, CD<sub>2</sub>Cl<sub>2</sub>) δ: 172.9, 169.6, 158.1, 130.1, 129.4, 119.9, 119.7, 117.5, 106.6, 64.99, 62.2, 62.1, 57.8, 48.7, 48.6, 14.4. **ESI-HRMS** calculated for C<sub>16</sub>H<sub>20</sub>NO<sub>6</sub> (M+H)<sup>+</sup>: 322.1285; found: 322.1267.

**(3*S*,3*aR*,4*S*,6*R*,6*aS*)-6-(2-hydroxyphenyl)-*N*,3-dimethoxy-*N*-methyl-1-oxohexahydro-1*H*-furo[3,4-*c*]pyrrole-4-carboxamide (**4s**):**

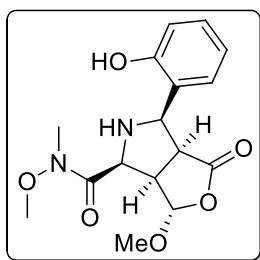

The reaction of ((*E*)-2-((2-hydroxybenzylidene)amino)-*N*-methoxy-*N*-methylacetamide (**1s**) (22.2 mg, 0.1 mmol), 5-methoxy-2(5*H*)-furanone (( $\pm$ )-**2a**) (11.4 mg, 0.1 mmol), and Takemoto's catalyst **3a** (8.2 mg, 20 mol%) in *p*-xylene (0.3 mL, [0.33]M) following the general procedure **GP3** and purification by flash column chromatography (Cy:EtOAc = 40:60), yielded de compound **4s** as a white solid (16.1 mg, 48% yield) and ( $\pm$ )-**2a** as a colorless oil (5.2 mg, 46% yield).

The enantiomeric excess for **4s** was determined by SFC on a *Daicel Chiralpak* IA column: CO<sub>2</sub>/MeOH gradient from 95:5 to 60:40 in 8 min, flow rate 3 mL/min,  $\lambda$  = 210 nm,  $\tau_{\text{minor}}$  = 5.27 min,  $\tau_{\text{major}}$  = 5.69 min (90% ee).  $[\alpha]_{\text{D}}^{20}$  = 0.160 (*c* = 0.32, CHCl<sub>3</sub>). The enantiomeric excess for ( $\pm$ )-**2a** was determined by SFC on a *Daicel Chiralpak* ID column: CO<sub>2</sub>/MeOH (95:5), flow rate 2 mL/min,  $\lambda$  = 210 nm,  $\tau_{\text{minor}}$  = not detected,  $\tau_{\text{major}}$  = 0.93 min (>99% ee). **c** = 52%, **s** = 100.

**<sup>1</sup>H NMR** (300 MHz, CDCl<sub>3</sub>)  $\delta$ : 7.24 – 7.16 (m, 1H), 7.08 (dd, *J* = 7.9, 1.8 Hz, 1H), 6.91 – 6.79 (m, 2H), 5.33 (d, *J* = 3.5 Hz, 1H), 4.63 (d, *J* = 9.4 Hz, 1H), 4.30 (d, *J* = 6.6 Hz, 1H), 3.79 (s, 3H), 3.53 – 3.44 (m, 1H), 3.49 (s, 3H), 3.34 – 3.28 (m, 1H), 3.26 (s, 3H). **<sup>13</sup>C NMR** (75 MHz, CDCl<sub>3</sub>)  $\delta$ : 172.6, 157.6, 130.0, 128.9, 119.7, 119.6, 117.8, 105.9, 64.2, 61.8, 60.6, 57.9, 45.0, 48.5, 32.7. **ESI-HRMS** calculated for C<sub>16</sub>H<sub>21</sub>N<sub>2</sub>O<sub>6</sub> (M+H)<sup>+</sup>: 337.1394; found: 337.1378.

**Methyl (3*S*,3*aR*,4*S*,6*R*,6*aS*)-3-ethoxy-6-(2-hydroxyphenyl)-1-oxohexahydro-1*H*-furo[3,4-*c*]pyrrole-4-carboxylate (**4t**):**

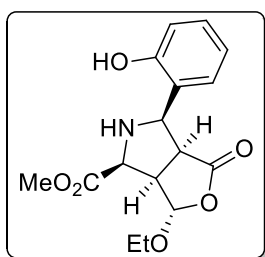

The reaction of methyl (*E*)-2-((2-hydroxybenzylidene)amino)acetate (**1b**) (19.3 mg, 0.1 mmol), 5-ethoxyfuran-2(5*H*)-one (( $\pm$ )-**2b**) (12.8 mg, 0.1 mmol), and Takemoto's catalyst **3a** (8.2 mg, 20 mol%) in *p*-xylene (0.3 mL, [0.33]M) following the general procedure **GP3** and purification by flash column chromatography (Cy:EtOAc = 40:60), yielded de compound **4t** as a white solid (14.4 mg, 45% yield) and ( $\pm$ )-**2b** as a colorless oil (4.7 mg, 37% yield). The enantiomeric excess for **4t** was determined by SFC on a *Daicel*

*Chiralpak* IA column: CO<sub>2</sub>/MeOH gradient from 95:5 to 60:40 in 8 min, flow rate 3 mL/min,  $\lambda$  = 210 nm,  $\tau_{\text{minor}}$  = 5.07 min,  $\tau_{\text{major}}$  = 5.89 min (97% ee).  $[\alpha]_{\text{D}}^{20}$  = 0.573 (*c* = 0.5, CHCl<sub>3</sub>). The enantiomeric excess for ( $\pm$ )-**2b** was determined by SFC on a *Daicel Chiralpak* ID column: CO<sub>2</sub>/MeOH (95:5), flow rate 2 mL/min,  $\lambda$  = 210 nm,  $\tau_{\text{major}}$  = 0.82 min (>99% ee).  $[\alpha]_{\text{D}}^{20}$  = – 0.018 (*c* = 0.34, CHCl<sub>3</sub>). **c** = 50%, **s** > 200 (Calculated as *s* = 348).

**<sup>1</sup>H NMR** (300 MHz, CDCl<sub>3</sub>)  $\delta$ : 9.77 (brs, 1H), 7.19 (td, *J* = 7.7, 1.7 Hz, 1H), 7.04 (dd, *J* = 7.5, 1.7 Hz, 1H), 6.83 (t, *J* = 8.6 Hz, 2H), 5.36 (d, *J* = 3.4 Hz, 1H), 4.58 (d, *J* = 9.3 Hz, 1H), 4.06 (d, *J* = 6.8 Hz, 1H), 3.90 – 3.79 (m, 4H), 3.59 (dq, *J* = 10.0, 7.0 Hz, 1H), 3.43 (t, *J* = 9.3 Hz, 1H), 3.22 (ddd, *J* = 9.6, 6.8, 3.5 Hz, 1H), 1.21 (t, *J* = 7.1 Hz, 3H). **<sup>13</sup>C NMR** (75 MHz, CDCl<sub>3</sub>)  $\delta$ : 172.6, 169.8, 157.4, 130.0, 128.9, 119.8, 119.4, 117.5, 104.9, 66.3, 64.6, 61.7, 52.6, 48.6, 48.5, 15.0. **ESI-HRMS** calculated for C<sub>16</sub>H<sub>20</sub>NO<sub>6</sub> (M+H)<sup>+</sup>: 322.1285; found: 322.1290.

**Methyl (3*R*,3*aR*,4*S*,6*R*,6*aS*)-3-(ethylthio)-6-(2-hydroxyphenyl)-1-oxohexahydro-1*H*-furo[3,4-*c*]pyrrole-4-carboxylate (**4u**):**

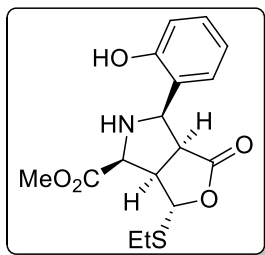

The reaction of methyl (*E*)-2-((2-hydroxybenzylidene)amino)acetate (**1b**) (19.3 mg, 0.1 mmol), 5-(ethylthio)furan-2(5*H*)-one ((**±**)-**2c**) (14.4 mg, 0.1 mmol), and Takemoto's catalyst **3a** (8.2 mg, 20 mol%) in *p*-xylene (0.3 mL, [0.33]M) following the general procedure **GP3** and purification by flash column chromatography (Cy:EtOAc = 40:60), yielded de compound **4u** as a white solid (9 mg, 26% yield) and (**–**)-**2c** as a colorless oil (4.3 mg, 29% yield). The enantiomeric excess for **4u** was determined by SFC on a *Daicel Chiralpak* IA column: CO<sub>2</sub>/MeOH gradient from 95:5 to 60:40 in 8 min, flow rate 3 mL/min, λ = 210 nm, τ<sub>minor</sub> = 4.89 min, τ<sub>major</sub> = 5.31 min (92% ee). [α]<sub>D</sub><sup>20</sup> = 0.533 (c = 0.33, CHCl<sub>3</sub>). The enantiomeric excess for (**–**)-**2c** was determined by SFC on a *Daicel Chiralpak* ID column: CO<sub>2</sub>/MeOH (95:5), flow rate 2 mL/min, λ = 210 nm, τ<sub>minor</sub> = 1.24 min, τ<sub>major</sub> = 1.63 min (1% ee). **c** = n.d., **s** = n.d.

**<sup>1</sup>H NMR** (300 MHz, CDCl<sub>3</sub>) δ: 7.22 (t, *J* = 7.8 Hz, 1H), 7.07 (d, *J* = 7.6 Hz, 1H), 6.87 (t, *J* = 6.8 Hz, 2H), 5.58 (d, *J* = 6.8 Hz, 1H), 4.68 (d, *J* = 9.8 Hz, 1H), 4.10 (d, *J* = 6.1 Hz, 1H), 3.84 (s, 3H), 3.45 (t, *J* = 9.6 Hz, 1H), 3.22 (dt, *J* = 9.4, 6.5 Hz, 1H), 2.87 – 2.62 (m, 2H), 1.31 (t, *J* = 7.4 Hz, 3H). **<sup>13</sup>C NMR** (75 MHz, CDCl<sub>3</sub>) δ: 172.8, 169.5, 157.3, 130.3, 129.0, 120.0, 119.2, 117.8, 84.7, 64.7, 62.0, 52.6, 48.8, 48.4, 26.5, 15.1. **ESI-HRMS** calculated for C<sub>16</sub>H<sub>20</sub>NO<sub>5</sub>S (M+H)<sup>+</sup>: 338.1057; found: 338.1063.

**Methyl (3*S*,3*aR*,4*S*,6*S*,6*aR*)-6a-bromo-6-(2-hydroxyphenyl)-3-methoxy-1-oxohexahydro-1*H*-furo[3,4-*c*]pyrrole-4-carboxylate (**4v**):**

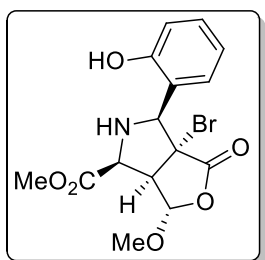

The reaction of methyl (*E*)-2-((2-hydroxybenzylidene)amino)acetate **1b** (19.3 mg, 0.1 mmol), 3-bromo-5-methoxyfuran-2(5*H*)-one ((**±**)-**2d**) (19.2 mg, 0.1 mmol), and Takemoto's catalyst **3a** (8.2 mg, 20 mol%) in *p*-xylene (0.3 mL, [0.33]M) following the general procedure **GP3** and purification by flash column chromatography (Cy:EtOAc = 40:60), yielded de compound **4v** as a white solid (13.1 mg, 34% yield) and (**–**)-**2d** as a colorless oil (5.9 mg, 52% yield).

The enantiomeric excess for **4v** was determined by SFC on a *Daicel Chiralpak* IC column: CO<sub>2</sub>/MeOH gradient from 95:5 to 60:40 in 8 min, flow rate 2 mL/min, λ = 210 nm, τ<sub>minor</sub> = 6.05 min, τ<sub>major</sub> = 5.49 min (87% ee). [α]<sub>D</sub><sup>20</sup> = 0.243 (c = 0.64, CHCl<sub>3</sub>). The enantiomeric excess for (**–**)-**2d** was determined by SFC on a *Daicel Chiralpak* ID column: CO<sub>2</sub>/MeOH gradient 95:5 in 8 min, flow rate 2 mL/min, λ = 210 nm, τ<sub>minor</sub> = 1.44, τ<sub>major</sub> = 1.18 min (47% ee). [α]<sub>D</sub><sup>20</sup> = -0.068 (c = 0.24, CHCl<sub>3</sub>). **c** = 35%, **s** = 22.

**<sup>1</sup>H NMR** (300 MHz, CDCl<sub>3</sub>) δ: 9.40 (brs, 1H), 7.30 – 7.16 (m, 2H), 6.93 – 6.80 (m, 2H), 5.29 (d, *J* = 3.3 Hz, 1H), 4.86 (s, 1H), 4.34 (d, *J* = 6.5 Hz, 1H), 3.86 (s, 3H), 3.53 (s, 3H), 3.44 (dd, *J* = 6.6, 3.3 Hz, 1H). **<sup>13</sup>C NMR** (75 MHz, CDCl<sub>3</sub>) δ: 169.1, 168.9, 157.0, 131.0, 129.8, 120.2, 117.9, 116.7, 104.6, 76.3, 60.4, 59.0, 58.8, 58.1, 53.0. **ESI-HRMS** calculated for C<sub>15</sub>H<sub>17</sub>BrNO<sub>6</sub> (M+H)<sup>+</sup>: 386.0234 and 388.0214; found: 386.0242 and 388.0222.

**Methyl (3*S*,3*aR*,4*S*,6*S*,6*aR*)-6-(2-hydroxyphenyl)-3-methoxy-1-oxo-6*a*-phenylhexahydro-1*H*-furo[3,4-*c*]pyrrole-4-carboxylate (4*w*):**

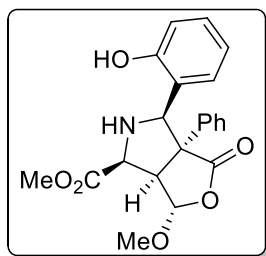

The reaction of methyl (*E*)-2-((2-hydroxybenzylidene)amino)acetate (**1b**) (19.3 mg, 0.1 mmol), 5-methoxy-3-phenylfuran-2(5*H*)-one ((±)-**2e**) (19 mg, 0.1 mmol), and Takemoto's catalyst **3a** (8.2 mg, 20 mol%) in Toluene (0.3 mL, [0.33]M) at 0°C following the general procedure **GP3** and purification by flash column chromatography (Cy:EtOAc = 40:60), yielded de compound **4w** as a white solid (15.3 mg, 40% yield) and (–)-**2e** as a colorless oil (6.84 mg, 36% yield). The enantiomeric excess for **4w** was determined by SFC on a

*Daicel Chiralpak* IA column: CO<sub>2</sub>/MeOH gradient from 95:5 to 60:40 in 8 min, flow rate 3 mL/min, λ = 210 nm, τ<sub>minor</sub> = 4.86 min, τ<sub>major</sub> = 5.04 min (75% ee). [α]<sub>D</sub><sup>20</sup> = 0.124 (c = 0.4, CHCl<sub>3</sub>). The enantiomeric excess for (–)-**2e** was determined by SFC on a *Daicel Chiralpak* ID column: CO<sub>2</sub>/MeOH (95:5), flow rate 2 mL/min, λ = 210 nm, τ<sub>minor</sub> = 2.66 min, τ<sub>major</sub> = 2.32 min (95% ee). [α]<sub>D</sub><sup>20</sup> = – 0.017 (c = 0.28, CHCl<sub>3</sub>). **c = 55%, s = 25.**

**<sup>1</sup>H NMR** (300 MHz, CDCl<sub>3</sub>) δ: 9.79 (brs, 1H), 7.56 – 7.50 (m, 2H), 7.43 – 7.29 (m, 3H), 7.25 – 7.16 (m, 2H), 6.85 (dd, *J* = 8.1, 1.2 Hz, 1H), 6.72 (td, *J* = 7.4, 1.2 Hz, 1H), 6.58 (dd, *J* = 7.6, 1.8 Hz, 1H), 5.26 (d, *J* = 2.6 Hz, 1H), 4.50 (s, 1H), 4.36 (d, *J* = 7.2 Hz, 1H), 3.87 (s, 3H), 3.59 (dd, *J* = 7.2, 2.6 Hz, 1H), 3.45 (s, 3H). **<sup>13</sup>C NMR** (75 MHz, CDCl<sub>3</sub>) δ: 172.7, 169.6, 157.9, 137.9, 130.3, 129.6, 129.1, 128.1, 126.7, 119.3, 118.5, 117.6, 104.0, 75.7, 61.9, 60.8, 57.5, 55.5, 52.8. **ESI-HRMS** calculated for C<sub>21</sub>H<sub>22</sub>NO<sub>6</sub> (M+H)<sup>+</sup>: 384.1442; found: 384.1448.

**Methyl (3*S*,3*aR*,4*S*,6*S*,6*aR*)-6-(2-hydroxyphenyl)-3-methoxy-1-oxo-6*a*-(1-(triisopropylsilyl)-1*H*-pyrrol-3-yl)hexahydro-1*H*-furo[3,4-*c*]pyrrole-4-carboxylate (4*x*):**

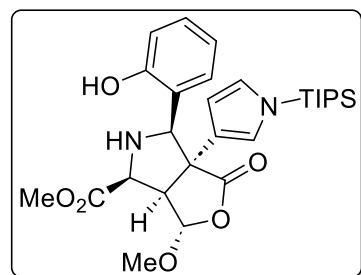

The reaction of methyl (*E*)-2-((2-hydroxybenzylidene)amino)acetate (**1b**) (19.3 mg, 0.1 mmol), 5-methoxy-3-(1-(triisopropylsilyl)-1*H*-pyrrol-3-yl)furan-2(5*H*)-one ((±)-**2f**) (33.5 mg, 0.1 mmol), and Takemoto's catalyst **3a** (8.2 mg, 20 mol%) in *p*-xylene (0.3 mL, [0.33]M) following the general procedure **GP3** and purification by flash column chromatography (Cy:EtOAc = 40:60), yielded de compound **4x** as a white solid (25 mg, 47% yield) and (–)-**2f** as a brown oil (13.1 mg, 39% yield). The enantiomeric excess for **4x** was determined by SFC on a *Daicel Chiralpak* IA

column: CO<sub>2</sub>/MeOH gradient from 95:5 to 60:40 in 8 min, flow rate 3 mL/min, λ = 210 nm, τ<sub>minor</sub> = 4.29 min, τ<sub>major</sub> = 4.60 min (97% ee). [α]<sub>D</sub><sup>20</sup> = 0.116 (c = 0.45, CHCl<sub>3</sub>). The enantiomeric excess for (–)-**2f** was determined by SFC on a *Daicel Chiralpak* ID column: CO<sub>2</sub>/MeOH (95:5), flow rate 2 mL/min, λ = 210 nm, τ<sub>minor</sub> = 1.37 min, τ<sub>major</sub> = 1.22 min (17% ee). [α]<sub>D</sub><sup>20</sup> = – 0.019 (c = 0.39, CHCl<sub>3</sub>). **c = 15%, s = 120** (Calculated as s = 117).

**<sup>1</sup>H NMR** (300 MHz, CDCl<sub>3</sub>) δ: 9.80 (brs, 1H), 7.25 – 7.14 (m, 1H), 6.85 (d, *J* = 8.2 Hz, 1H), 6.81 – 6.75 (m, 2H), 6.72 – 6.66 (m, 2H), 6.24 (d, *J* = 2.5 Hz, 1H), 5.25 (d, *J* = 2.9 Hz, 1H), 4.40 (s, 1H), 4.33 (d, *J* = 6.8 Hz, 1H), 3.87 (s, 3H), 3.48 (s, 3H), 3.42 (dd, *J* = 6.7, 3.0 Hz, 1H), 1.40 (sept, *J* = 7.9 Hz, 3H), 1.08 (d, *J* = 7.6, 9H), 1.07 (d, *J* = 7.6, 9H). **<sup>13</sup>C NMR** (75 MHz, CDCl<sub>3</sub>) δ: 173.5, 169.9, 157.7, 130.1, 129.5, 125.3, 123.0, 122.4, 119.1, 118.9, 117.4, 108.2, 104.6, 75.6, 62.0, 57.5, 57.2, 55.9, 52.7, 17.9, 11.7. **ESI-HRMS** calculated for C<sub>28</sub>H<sub>41</sub>N<sub>2</sub>O<sub>6</sub>Si (M+H)<sup>+</sup>: 529.2729; found: 529.2735.

**Methyl (3*S*,3*aR*,4*S*,6*S*,6*aS*)-6-(2-hydroxyphenyl)-3-methoxy-6*a*-((*E*)-oct-1-en-1-yl)-1-oxohexahydro-1*H*-furo[3,4-*c*]pyrrole-4-carboxylate (**4y**):**

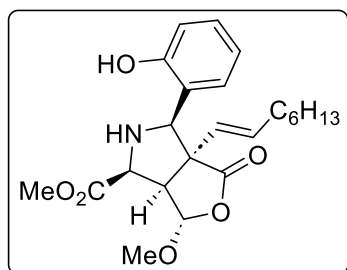

The reaction of methyl (*E*)-2-((2-hydroxybenzylidene)amino)acetate (**1b**) (19.3 mg, 0.1 mmol), (*E*)-5-methoxy-3-(oct-1-en-1-yl)furan-2(5*H*)-one (( $\pm$ )-**2g**) (22.4 mg, 0.1 mmol), and Takemoto's catalyst **3a** (8.2 mg, 20 mol%) in *p*-xylene (0.3 mL, [0.33]M) following the general procedure **GP3** and purification by flash column chromatography (Cy:EtOAc = 40:60), yielded de compound **4y** as a white solid (17 mg, 41% yield) and ( $\pm$ )-**2g** as a yellow oil (9.2 mg, 41% yield). The enantiomeric excess for **4y** was determined by SFC on a *Daicel Chiralpak* IA

column: CO<sub>2</sub>/MeOH gradient from 95:5 to 60:40 in 8 min, flow rate 3 mL/min,  $\lambda$  = 210 nm,  $\tau_{\text{minor}}$  = 4.11 min,  $\tau_{\text{major}}$  = 4.53 min (93% ee).  $[\alpha]_{\text{D}}^{20}$  = 0.081 (*c* = 0.49, CHCl<sub>3</sub>). The enantiomeric excess for ( $\pm$ )-**2g** was determined by SFC on a *Daicel Chiralpak* IG column: CO<sub>2</sub>/MeOH (95:5), flow rate 2 mL/min,  $\lambda$  = 210 nm,  $\tau_{\text{minor}}$  = 6.99 min,  $\tau_{\text{major}}$  = 5.80 min (86% ee).  $[\alpha]_{\text{D}}^{20}$  = -0.141 (*c* = 0.32, CHCl<sub>3</sub>). **c** = 48%, **s** = 80 (Calculated as *s* = 79).

**<sup>1</sup>H NMR** (300 MHz, CDCl<sub>3</sub>)  $\delta$ : 9.59 (brs, 1H), 7.22 (t, *J* = 7.7 Hz, 1H), 6.97 (d, *J* = 7.5 Hz, 1H), 6.83 (t, *J* = 8.2 Hz, 2H), 5.85 – 5.65 (m, 2H), 5.21 (d, *J* = 2.8 Hz, 1H), 4.25 (s, 1H), 4.14 (d, *J* = 6.9 Hz, 1H), 3.85 (s, 3H), 3.49 (s, 3H), 3.19 (dd, *J* = 6.3, 3.3 Hz, 1H), 2.09 (q, *J* = 6.9 Hz, 2H), 1.45 – 1.19 (m, 8H), 0.89 (t, *J* = 6.5 Hz, 3H). **<sup>13</sup>C NMR** (75 MHz, CDCl<sub>3</sub>)  $\delta$ : 173.4, 169.7, 157.7, 133.3, 130.3, 129.1, 126.9, 119.6, 118.6, 117.7, 104.5, 74.3, 61.5, 59.2, 57.6, 53.4, 52.8, 32.7, 31.8, 29.1, 28.9, 22.7, 14.2. **ESI-HRMS** calculated for C<sub>23</sub>H<sub>32</sub>NO<sub>6</sub> (M+H)<sup>+</sup>: 418.2225; found: 418.2231.

**Methyl (1*S*,3*R*,3*aS*,6*R*,6*aR*)-5-acetyl-3-(2-hydroxyphenyl)-6-methoxy-4-oxooctahydropyrrolo[3,4-*c*]pyrrole-1-carboxylate (**4z**):**

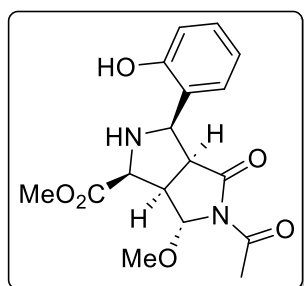

The reaction of methyl (*E*)-2-((2-hydroxybenzylidene)amino)acetate (**1b**) (19.3 mg, 0.1 mmol), 1-acetyl-5-methoxy-1*H*-pyrrol-2(5*H*)-one (( $\pm$ )-**2h**) (15.5 mg, 0.1 mmol), and Takemoto's catalyst **3a** (8.2 mg, 20 mol%) in *p*-xylene (0.3 mL, [0.33]M) following the general procedure **GP3** and purification by flash column chromatography (Cy:EtOAc = 40:60), yielded de compound **4z** as a white solid (16.3 mg, 47% yield) and ( $\pm$ )-**2h** as a colorless oil (6 mg, 39% yield). The enantiomeric excess for **4z** was determined by SFC on a *Daicel Chiralpak* IA column: CO<sub>2</sub>/MeOH gradient from 95:5 to 60:40 in 8

min, flow rate 3 mL/min,  $\lambda$  = 210 nm,  $\tau_{\text{minor}}$  = 4.56 min,  $\tau_{\text{major}}$  = 5.18 min (7% ee). The enantiomeric excess for ( $\pm$ )-**2h** was determined by SFC on a *Daicel Chiralpak* ID column: CO<sub>2</sub>/MeOH (95:5), flow rate 2 mL/min,  $\lambda$  = 210 nm,  $\tau_{\text{minor}}$  = 1.55 min,  $\tau_{\text{major}}$  = 2.39 min (3% ee). **c** = n.d., **s** = n.d.

**<sup>1</sup>H NMR** (300 MHz, CDCl<sub>3</sub>)  $\delta$ : 7.25 – 7.18 (m, 1H), 7.06 (d, *J* = 7.3 Hz, 1H), 6.89 – 6.78 (m, 2H), 5.26 (t, *J* = 1.2 Hz, 1H), 4.62 (d, *J* = 8.5 Hz, 1H), 4.17 (d, *J* = 8.4 Hz, 1H), 3.86 (s, 3H), 3.50 – 3.40 (m, 4H), 3.21 – 3.12 (m, 1H), 2.37 (s, 3H). **<sup>13</sup>C NMR** (75 MHz, CDCl<sub>3</sub>)  $\delta$ : 171.7, 171.2, 170.3, 157.9, 130.1, 128.9, 119.7, 119.5, 117.4, 88.8, 65.7, 62.2, 57.5, 52.9, 51.1, 44.5, 24.8. **ESI-HRMS** calculated for C<sub>17</sub>H<sub>21</sub>N<sub>2</sub>O<sub>6</sub> (M+H)<sup>+</sup>: 349.1395; found: 349.1401.

## Further derivatizations of (–)-2a in one pot and direct procedures.

### (4*R*,5*R*)-5-methoxy-4-(((*R*)-1-phenylethyl)amino)dihydrofuran-2(3*H*)-one (**5**):<sup>12</sup>

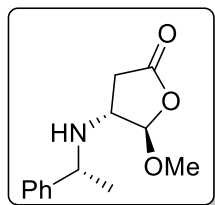

**Procedure A:** After Kinetic Resolution of ((±)-2a) by reaction with imine **1b**, (*S*)-1-phenylethanamine (12.1 mg, 0.1 mmol) was added *in-situ* to the reaction mixture and further stirred for another 24 h. The reaction was monitored by TLC. After completion, the solvent was evaporated under vacuum and purified by preparative TLC (Cy:EtOAc = 85:15) to yield the compound **5** as a yellow solid (10.6 mg, 45% yield). The enantiomeric excess for **5** was determined by SFC on a *Daicel Chiralpak* IA column: CO<sub>2</sub>/MeOH gradient from 95:5 to 60:40 in 8 min, flow rate 3 mL/min, λ = 210 nm, τ<sub>minor</sub> = 3.35 min, τ<sub>major</sub> = 3.15 min (88% ee). [α]<sub>D</sub><sup>20</sup> = -0.058 (c = 0.1, CHCl<sub>3</sub>).

**Procedure B:** To a solution of 5-methoxyfuran-2(5*H*)-one ((–)-2a) (5.7 mg, 0.05 mmol, 88% ee), obtained by kinetic resolution process, in *p*-xylene (0.15 mL, [0.33]M), (*S*)-1-phenylethanamine (12.1 mg, 0.1 mmol) was added. The reaction mixture was stirred at room temperature for 24 h. After completion, the solvent was evaporated under vacuum and purified by preparative TLC (Cy:EtOAc = 85:15) to yield the compound **5** as a yellow solid (10.4 mg, 88% yield). The enantiomeric excess for **5** was determined by SFC on a *Daicel Chiralpak* IA column: CO<sub>2</sub>/MeOH gradient from 95:5 to 60:40 in 8 min, flow rate 3 mL/min, λ = 210 nm, τ<sub>minor</sub> = 3.35 min, τ<sub>major</sub> = 3.15 min (87% ee). Spectroscopic data are in agreement with published data.<sup>12</sup>

**<sup>1</sup>H NMR** (300 MHz, CDCl<sub>3</sub>) δ (ppm): 7.39 – 7.28 (m, 5H), 4.90 (s, 1H), 3.81 (q, *J* = 6.6 Hz, 1H), 3.56 (s, 1H), 3.32 (s, 3H), 3.30 – 3.24 (m, 1H), 2.77 (dd, *J* = 17.7, 7.2 Hz, 1H), 2.39 – 2.29 (m, 1H), 1.38 (d, *J* = 6.6 Hz, 3H). **ESI-HRMS** calculated for C<sub>13</sub>H<sub>18</sub>NO<sub>3</sub> (M+H)<sup>+</sup>: 236.1281; found: 236.1265.

### (4*R*,5*R*)-5-methoxy-4-(phenylthio)dihydrofuran-2(3*H*)-one (**6**):<sup>12</sup>

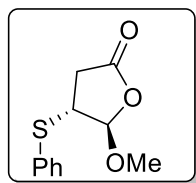

**Procedure A:** After Kinetic Resolution of ((±)-2a) by reaction with imine **1b**, *p*-xylene was evaporated under vacuum, and toluene (0.3 mL, [0.33]M) was added, and the reaction mixture was stirred for 5 min at –25 °C. At that time, benzenethiol (5.51 mg, 0.05 mmol) was added and the reaction was further stirred for another 24 h. The reaction was monitored by TLC. After completion, the solvent was evaporated under vacuum and purified by flash column chromatography on Iatrobeds silica gel (Cy:EtOAc = 95:5) to yield compound **6** as a yellow solid (9 mg, 44% yield).

The enantiomeric excess for **6** was determined by SFC on a *Daicel Chiralpak* ID column: CO<sub>2</sub>/MeOH (95:5), flow rate 2 mL/min, λ = 210 nm, τ<sub>minor</sub> = 2.49 min, τ<sub>major</sub> = 2.64 min (91% ee). [α]<sub>D</sub><sup>20</sup> = -0.029 (c = 0.2, CHCl<sub>3</sub>).

**Procedure B:** To a solution of 5-methoxyfuran-2(5*H*)-one ((–)-2a) (5.7 mg, 0.05 mmol, 88% ee), obtained by kinetic resolution process, in toluene (0.15 mL, [0.33]M), benzenethiol (11 mg, 0.1 mmol) was added. The reaction mixture was stirred at –25 °C for 24 h. After completion, the solvent was evaporated under vacuum and purified by flash column chromatography on Iatrobeds silica gel (Cy:EtOAc = 95:5) to yield compound **6** as a yellow solid (9 mg, 80% yield). The enantiomeric excess for **6** was determined by SFC on a *Daicel Chiralpak* ID column: CO<sub>2</sub>/MeOH (95:5), flow rate 2 mL/min, λ = 210 nm, τ<sub>minor</sub> = 2.49 min, τ<sub>major</sub> = 2.64 min (90% ee).

Spectroscopic data are in agreement with published data.<sup>13</sup>

**<sup>1</sup>H NMR** (300 MHz, CDCl<sub>3</sub>) δ: 7.47 – 7.30 (m, 5H), 5.26 (d, *J* = 1.3 Hz, 1H), 3.81 (ddd, *J* = 8.4, 3.0, 1.3 Hz, 1H), 3.45 (s, 3H), 3.09 (dd, *J* = 18.3, 8.3 Hz, 1H), 2.46 (dd, *J* = 18.4, 2.9 Hz, 1H). **<sup>13</sup>C NMR** (76 MHz, CDCl<sub>3</sub>) δ: 174.3, 132.3, 131.9, 129.6, 128.3, 108.5, 57.1, 46.5, 33.9. **ESI-HRMS** calculated for C<sub>11</sub>H<sub>13</sub>O<sub>3</sub>S (M+H)<sup>+</sup>: 225.0580; found: 225.0572.

**(1*R*,3*aS*,3*bR*,14*aR*)-1-methoxy-3*a*,3*b*,8,14*a*-tetrahydrodibenzo[*c,f*]furo[3',4':4,5]isoxazolo[2,3-*a*]azepin-3(1*H*)-one (7):**<sup>14</sup>

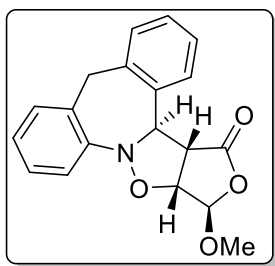

*Procedure A:* After Kinetic Resolution of ((±)-**2a**) by reaction with imine **1b**, 11*H*-dibenzo[*b,e*]azepine 5-oxide (10.5 mg, 0.05 mmol) was added *in-situ* to the reaction mixture and further stirred for another 2 h. The reaction was monitored by TLC. After completion, the solvent was evaporated under vacuum and purified by flash column chromatography on latrobeads silica gel (Cy:EtOAc = 90:10) to yield the compound **7** as a white solid (14.8 mg, 46% yield). The enantiomeric excess for **7** was determined by SFC on a *Daicel Chiralpak* IC column: CO<sub>2</sub>/MeOH gradient from 95:5 to 60:40 in 8 min,

flow rate 3 mL/min,  $\lambda$  = 210 nm,  $\tau_{\text{minor}}$  = 4.60 min,  $\tau_{\text{major}}$  = 4.34 min (91% ee).  $[\alpha]_{\text{D}}^{20}$  = -0.07 (*c* = 0.16, CHCl<sub>3</sub>).

*Procedure B:* To a solution of 5-methoxyfuran-2(5*H*)-one ((-)-**2a**) (5.7 mg, 0.05 mmol, 88% ee), obtained by kinetic resolution process, in *p*-xylene (0.15 mL, [0.33]M), 11*H*-dibenzo[*b,e*]azepine 5-oxide (21 mg, 0.1 mmol) was added. The reaction mixture was stirred at room temperature for 2 h. After completion, the solvent was evaporated under vacuum and purified by flash column chromatography on latrobeads silica gel (Cy:EtOAc = 90:10) to yield the compound **7** as a white solid (15.1 mg, 93% yield). The enantiomeric excess for **7** was determined by SFC on a *Daicel Chiralpak* IC column: CO<sub>2</sub>/MeOH gradient from 95:5 to 60:40 in 8 min, flow rate 3 mL/min,  $\lambda$  = 210 nm,  $\tau_{\text{minor}}$  = 4.60 min,  $\tau_{\text{major}}$  = 4.34 min (90% ee).

Spectroscopic data are in agreement with published data.<sup>14</sup>

**<sup>1</sup>H NMR** (300 MHz, CDCl<sub>3</sub>)  $\delta$  (ppm): 7.63 (d, *J* = 7.3 Hz, 1H), 7.35 (dd, *J* = 8.0, 1.4 Hz, 1H), 7.25 – 7.18 (m, 5H), 7.04 (td, *J* = 7.4, 1.3 Hz, 1H), 5.60 (s, 1H), 4.83 (d, *J* = 6.8 Hz, 1H), 4.65 (d, *J* = 5.7 Hz, 1H), 4.42 (d, *J* = 14.7 Hz, 1H), 3.96 (dd, *J* = 6.7, 5.7 Hz, 1H), 3.82 (d, *J* = 14.7 Hz, 1H), 3.62 (s, 3H). **ESI-HRMS** calculated for C<sub>19</sub>H<sub>18</sub>NO<sub>4</sub> (M+H)<sup>+</sup>: 324.1230; found: 324.1248.

## NMR Spectra

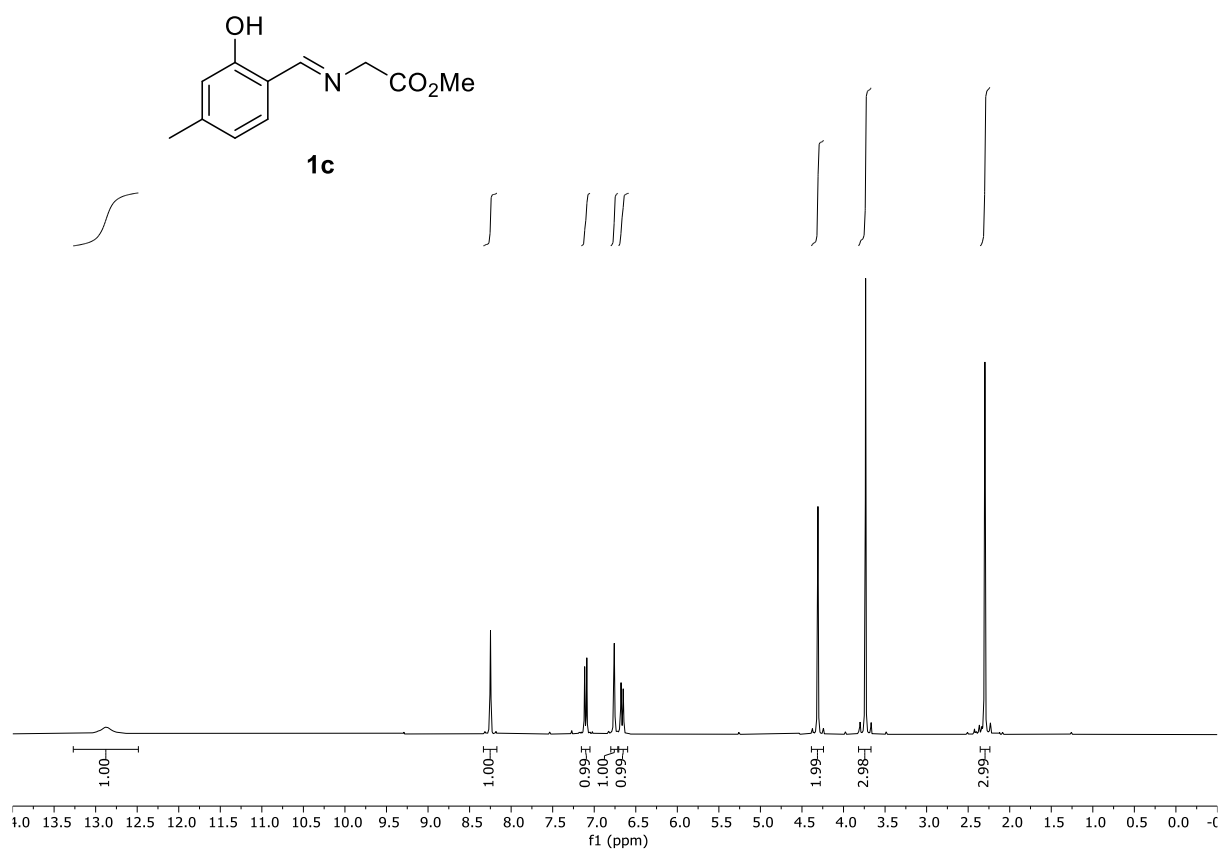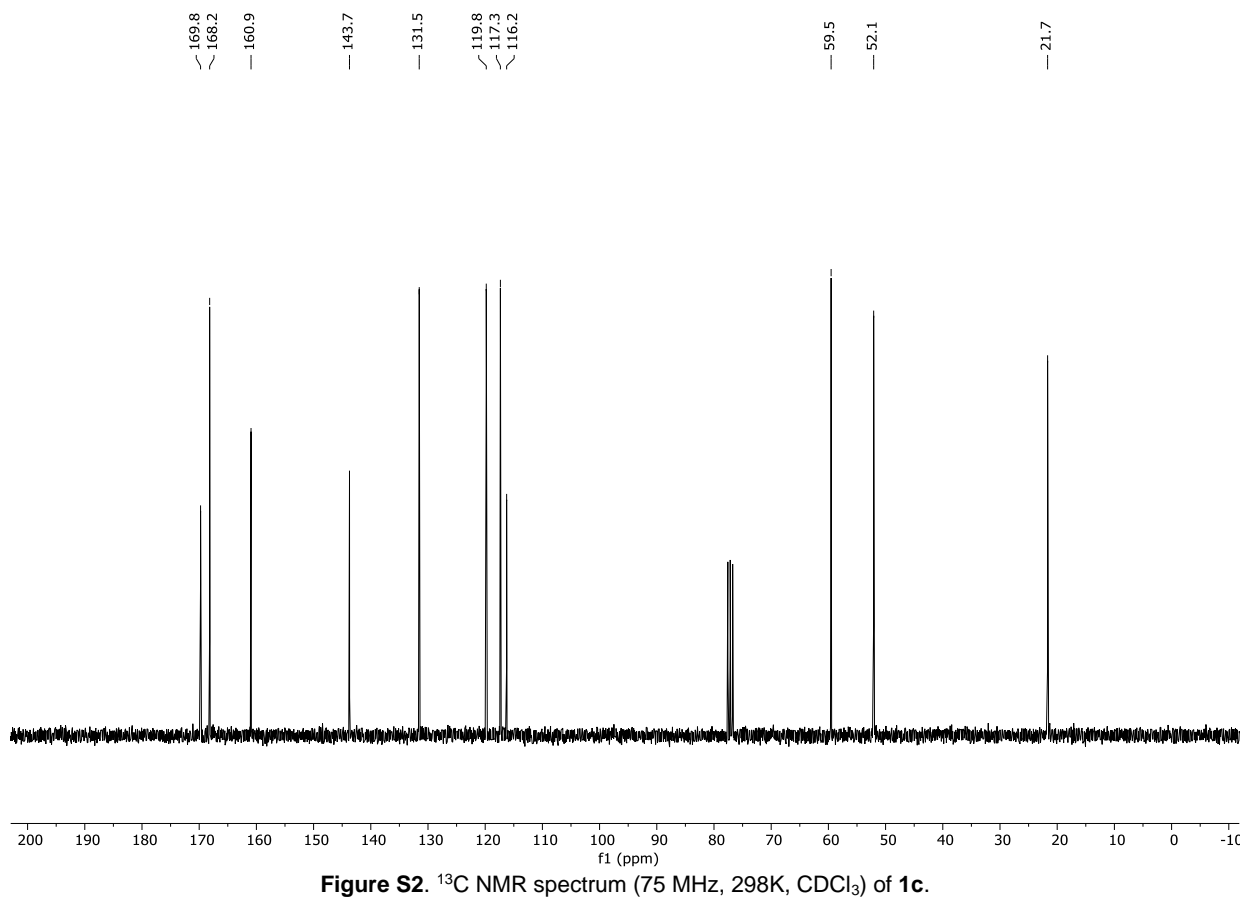

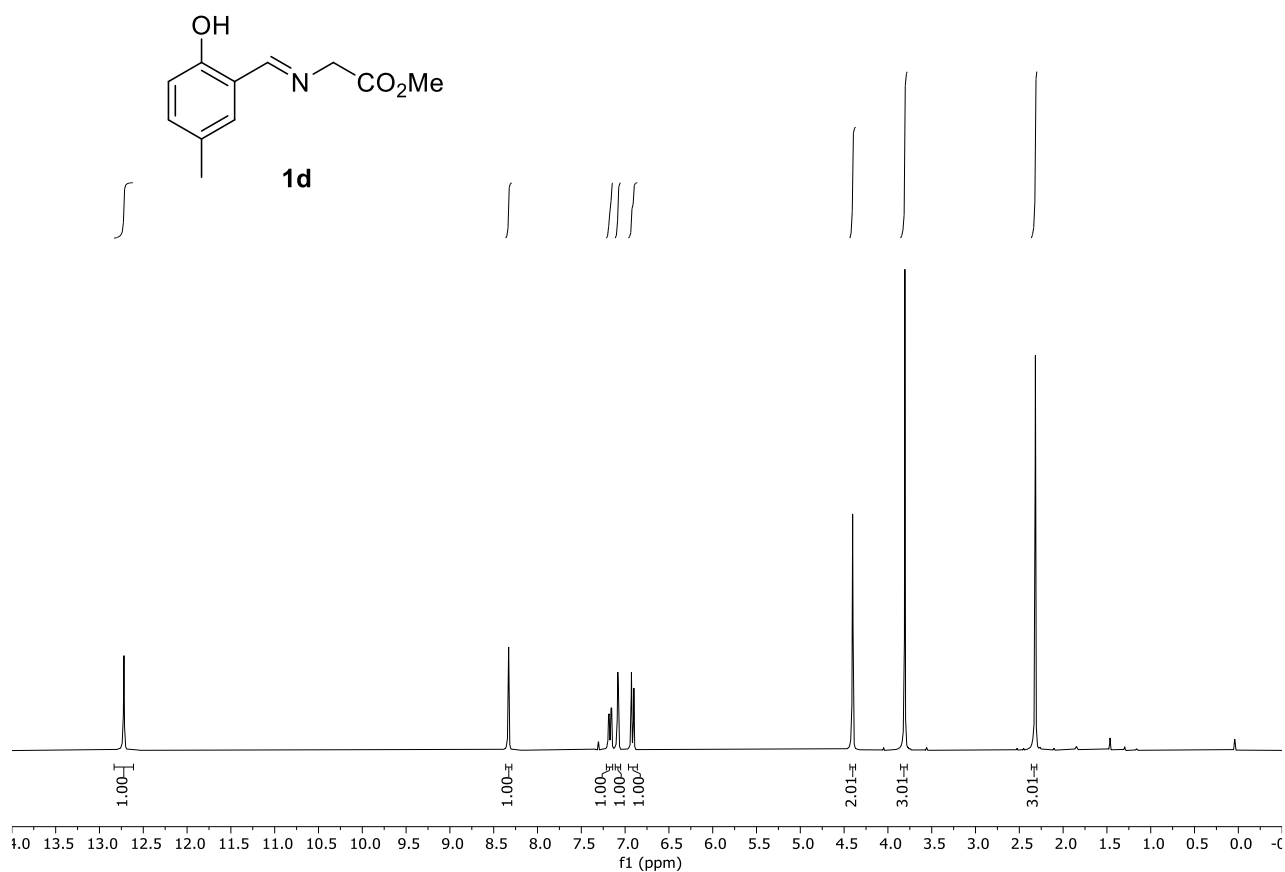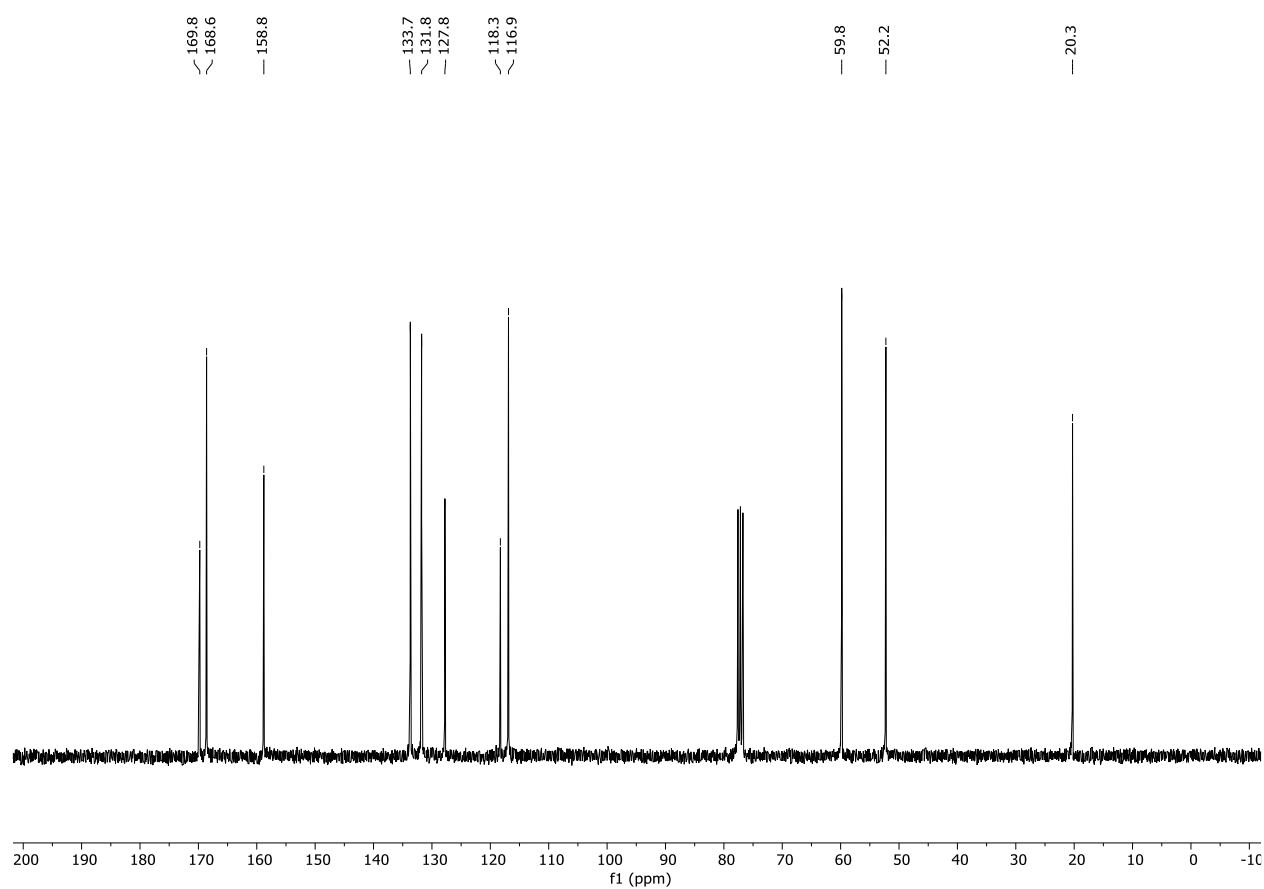

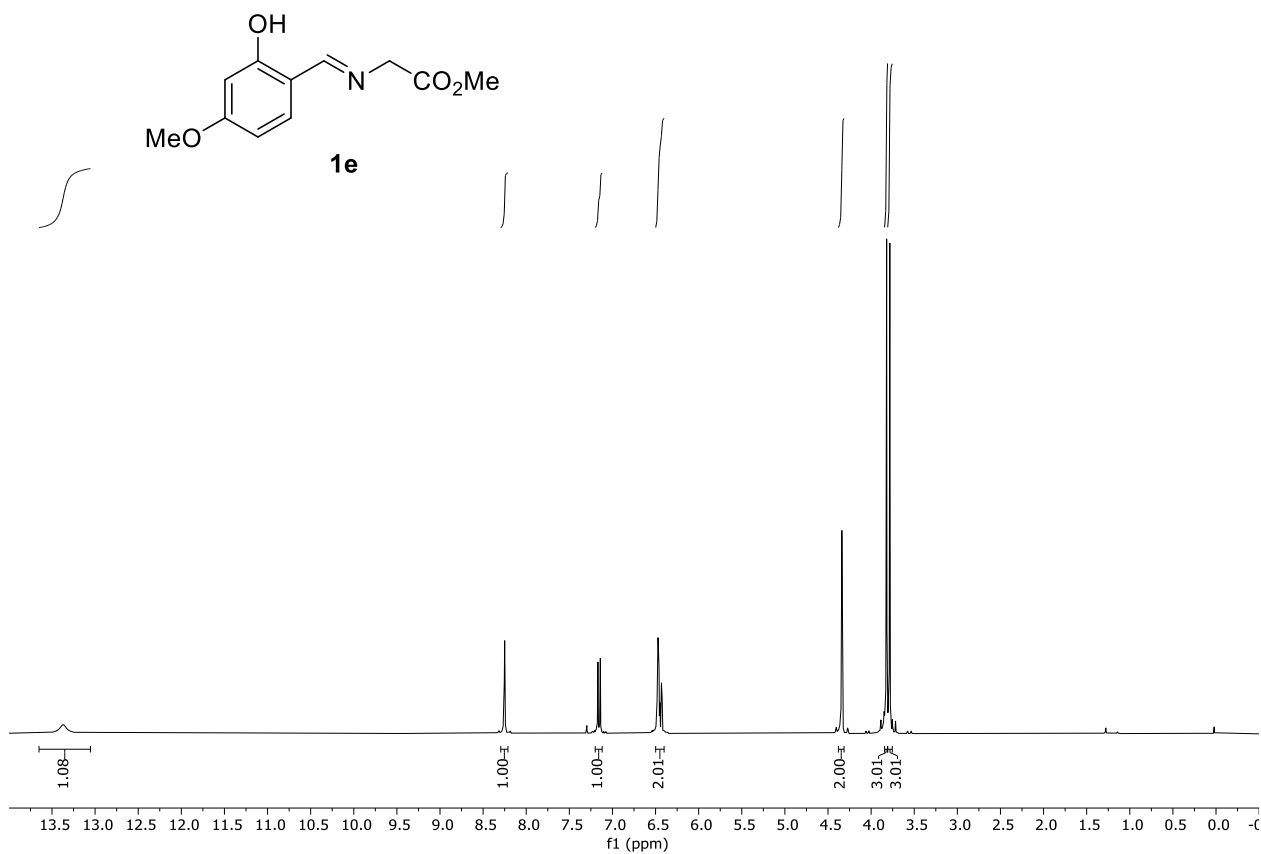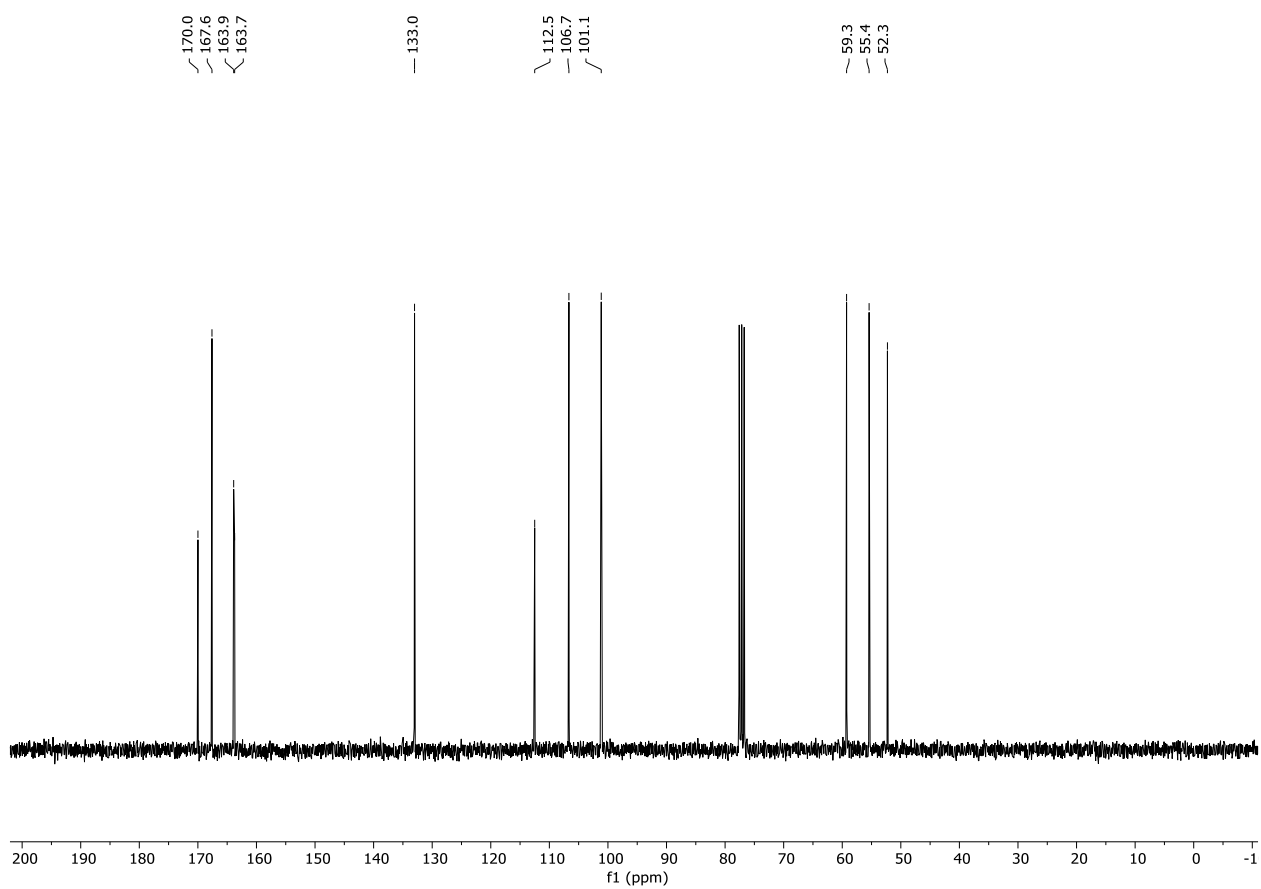

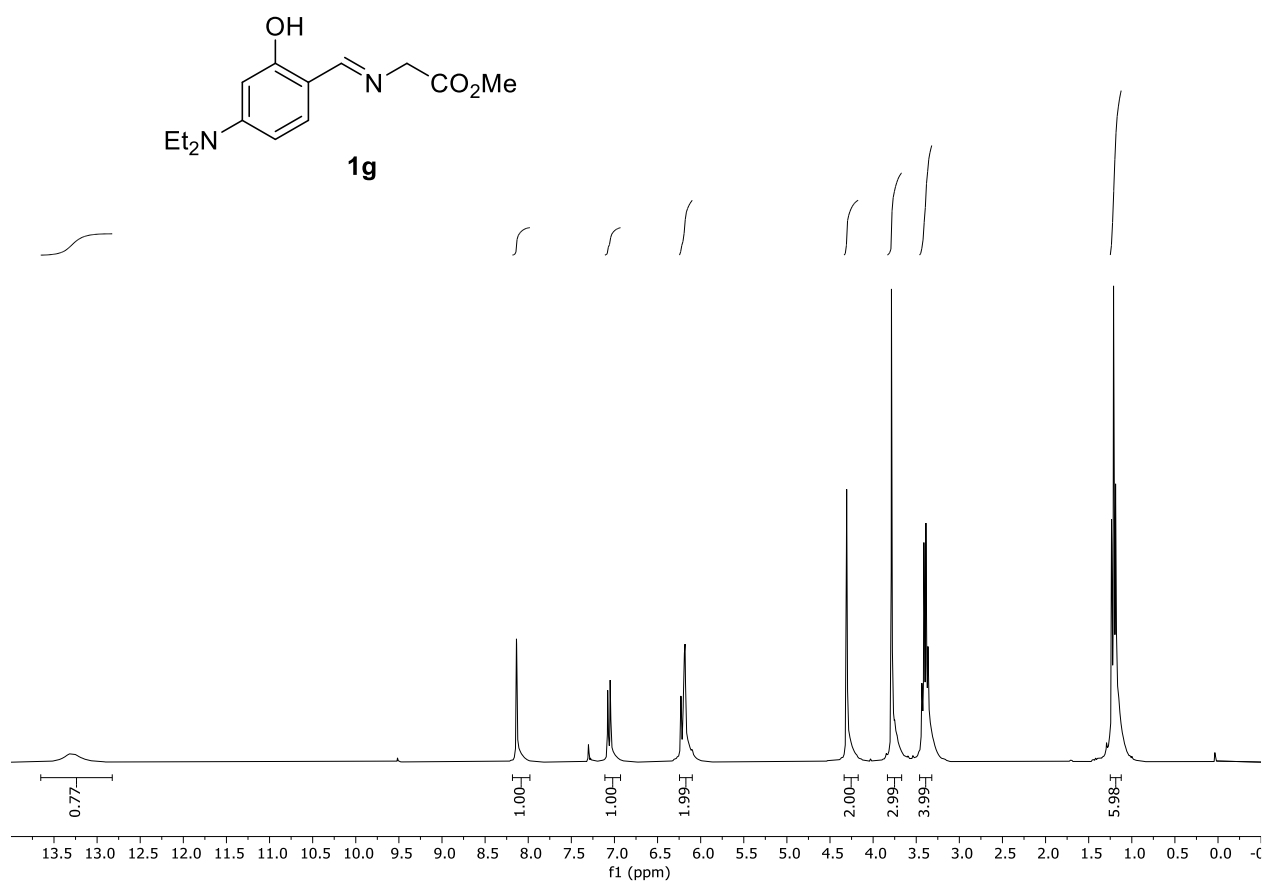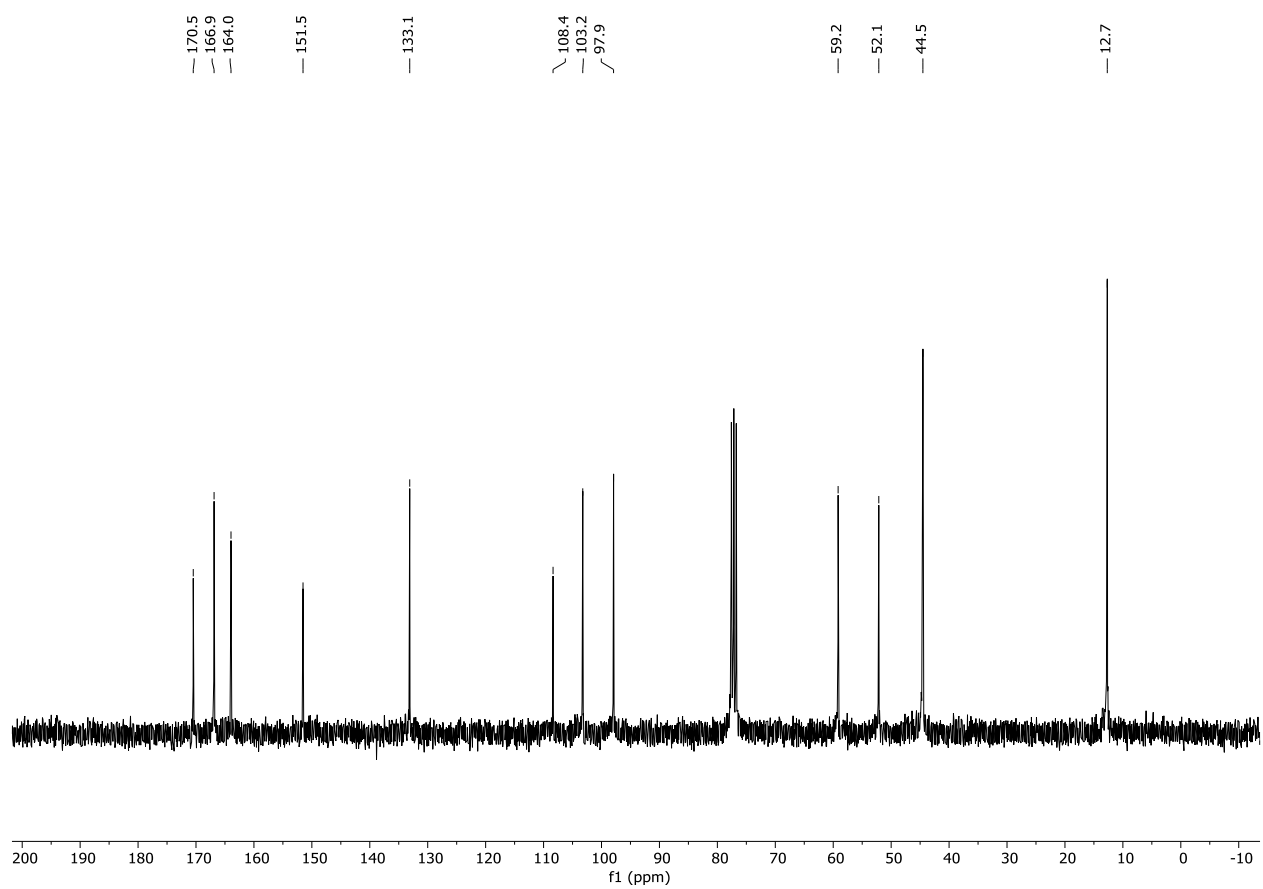

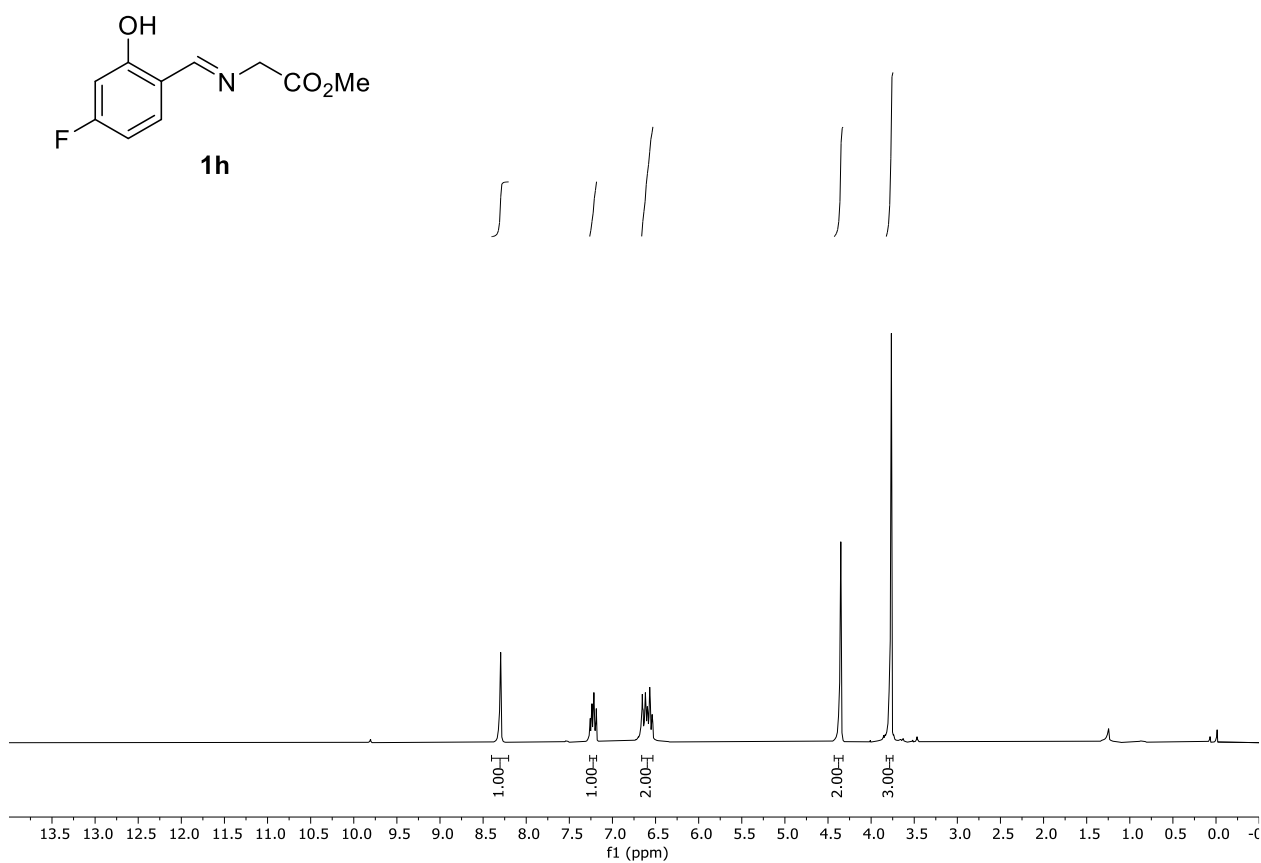

**Figure S9.** <sup>1</sup>H NMR spectrum (300 MHz, 298K, CDCl<sub>3</sub>) of **1h**.

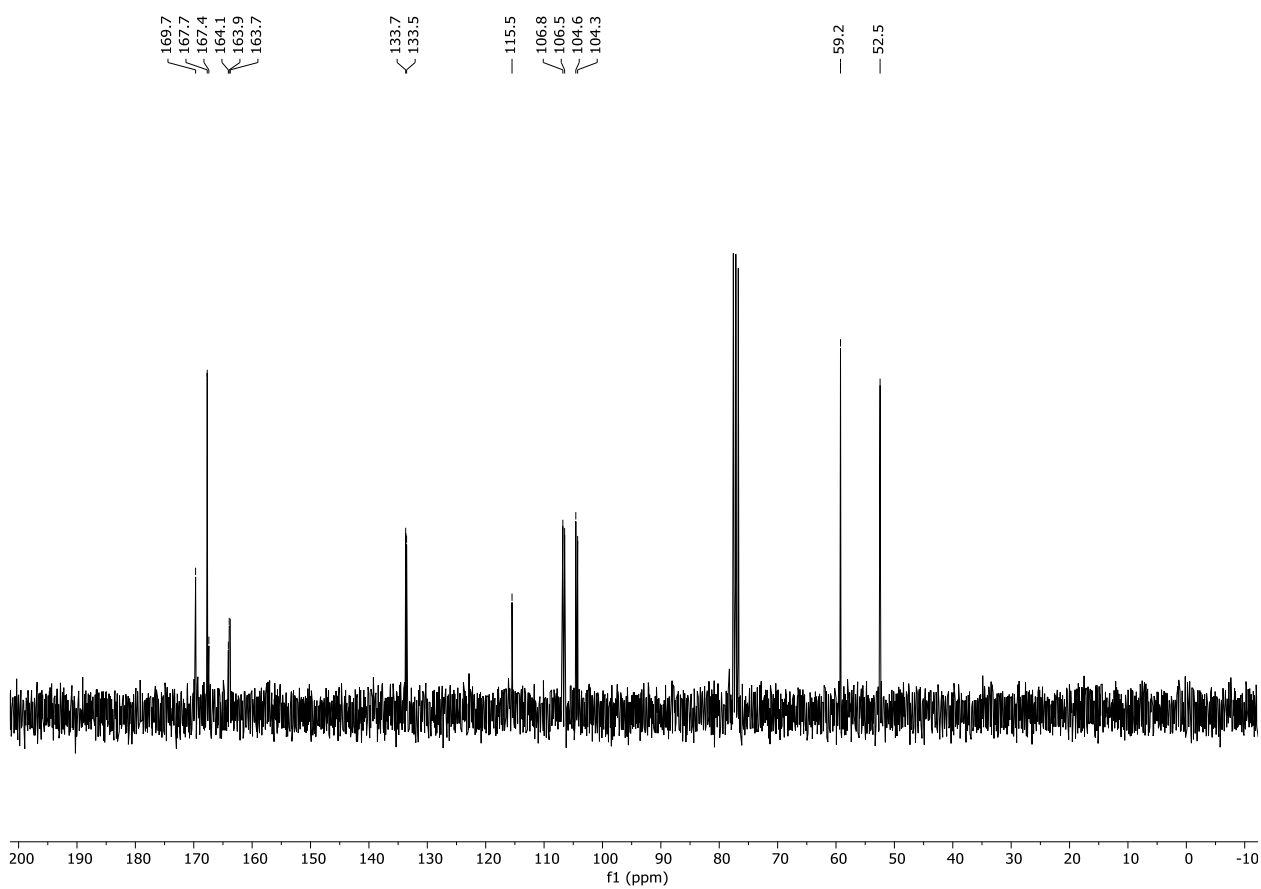

**Figure S10.** <sup>13</sup>C NMR spectrum (75 MHz, 298K, CDCl<sub>3</sub>) of **1h**.

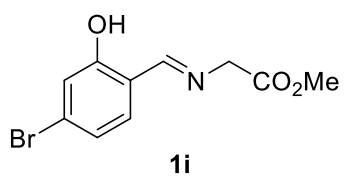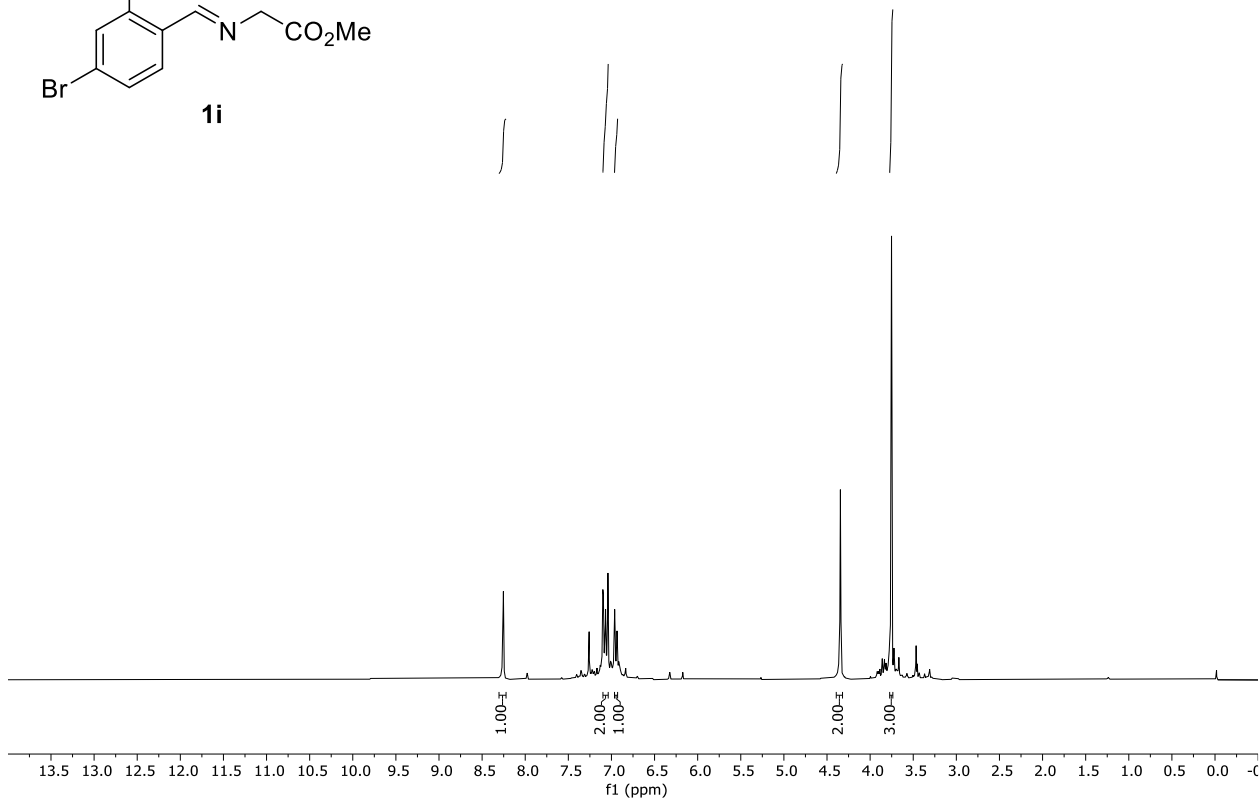

**Figure S11.** <sup>1</sup>H NMR spectrum (300 MHz, 298K, CDCl<sub>3</sub>) of **1i**.

169.5  
167.8  
162.2

132.8  
127.3  
122.0  
120.6  
117.3

59.1  
52.5

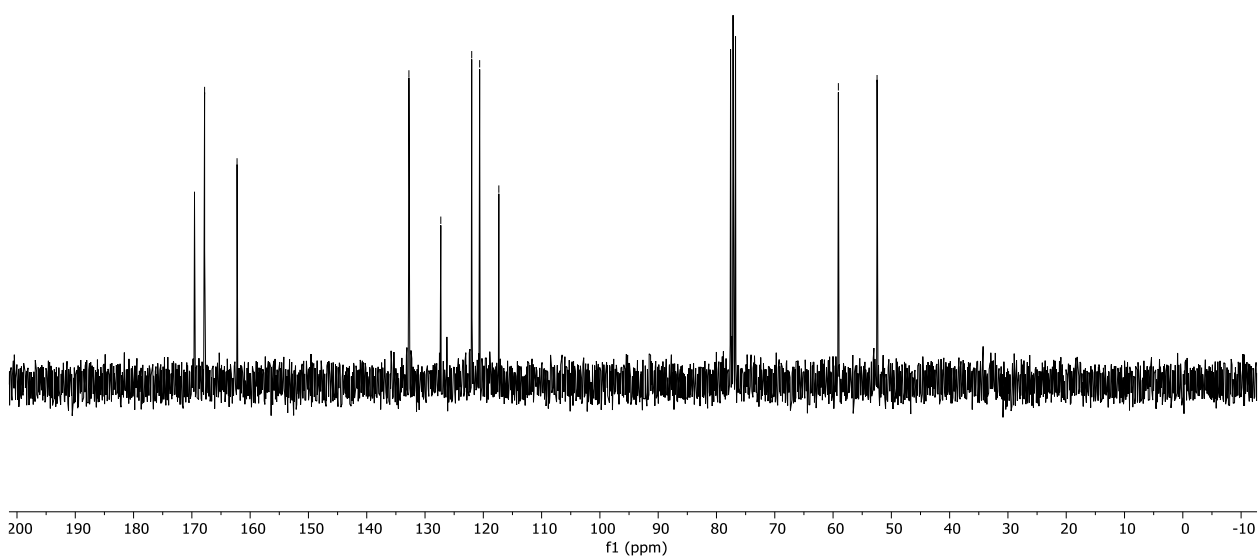

**Figure S12.** <sup>13</sup>C NMR spectrum (75 MHz, 298K, CDCl<sub>3</sub>) of **1i**.

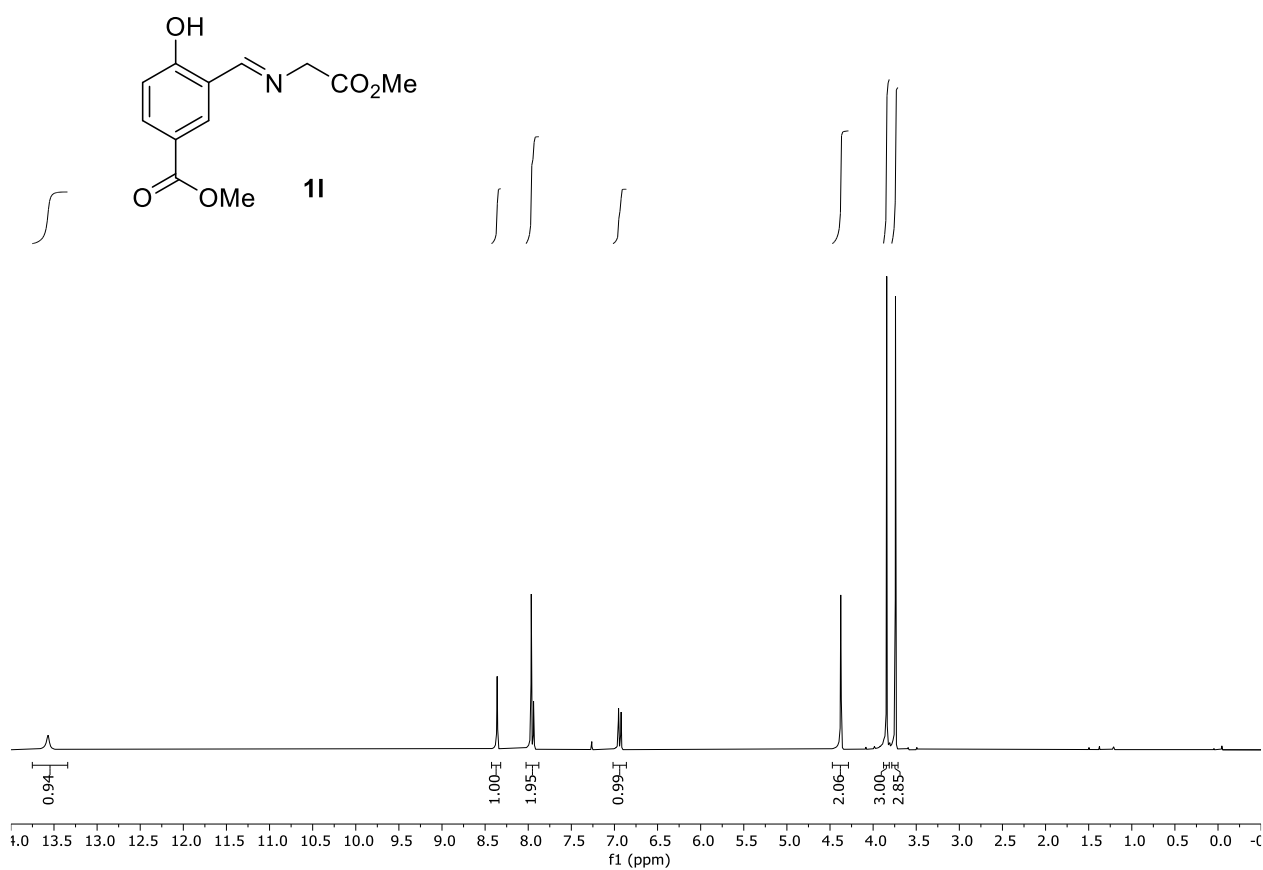

**Figure S13.** <sup>1</sup>H NMR spectrum (300 MHz, 298K, CDCl<sub>3</sub>) of **11**.

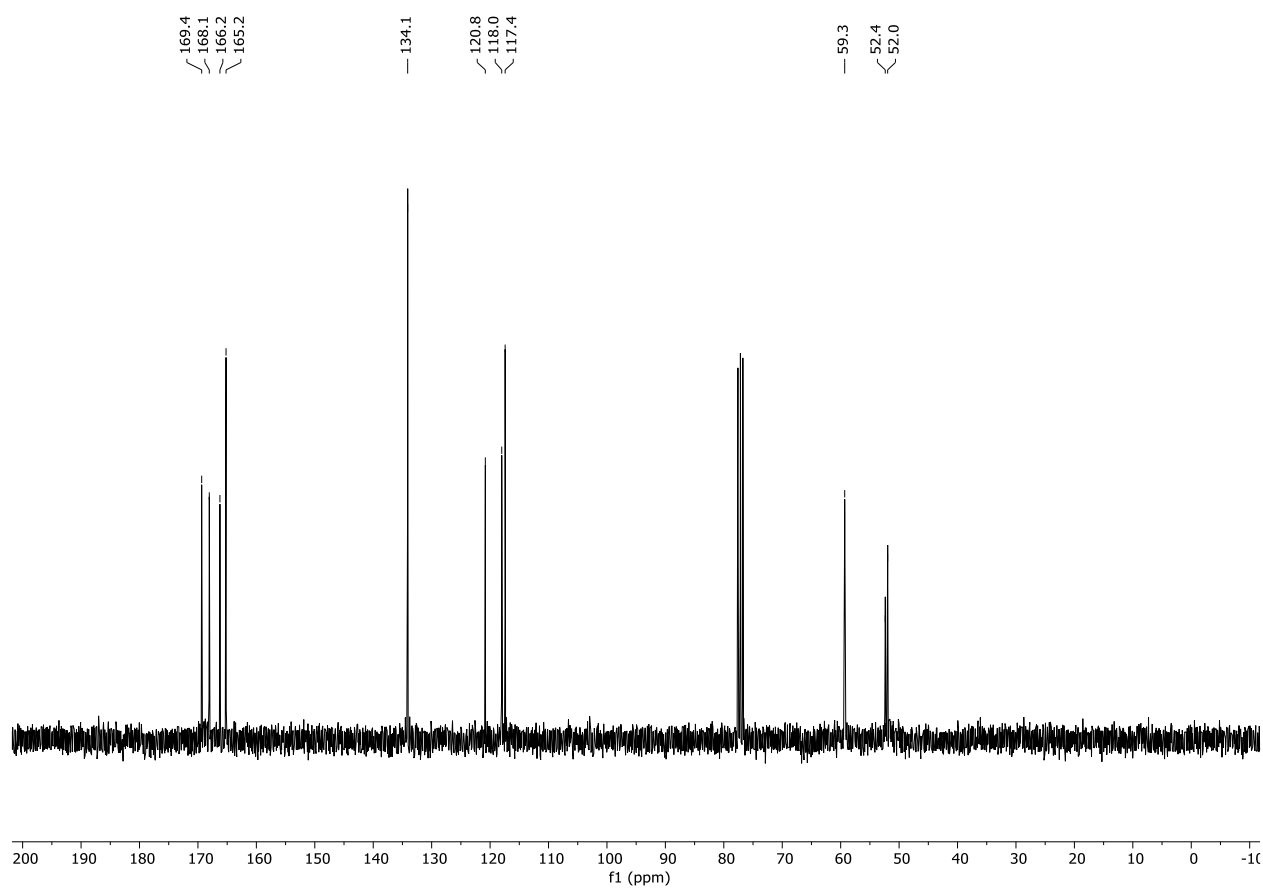

**Figure S14.** <sup>13</sup>C NMR spectrum (75 MHz, 298K, CDCl<sub>3</sub>) of **11**.

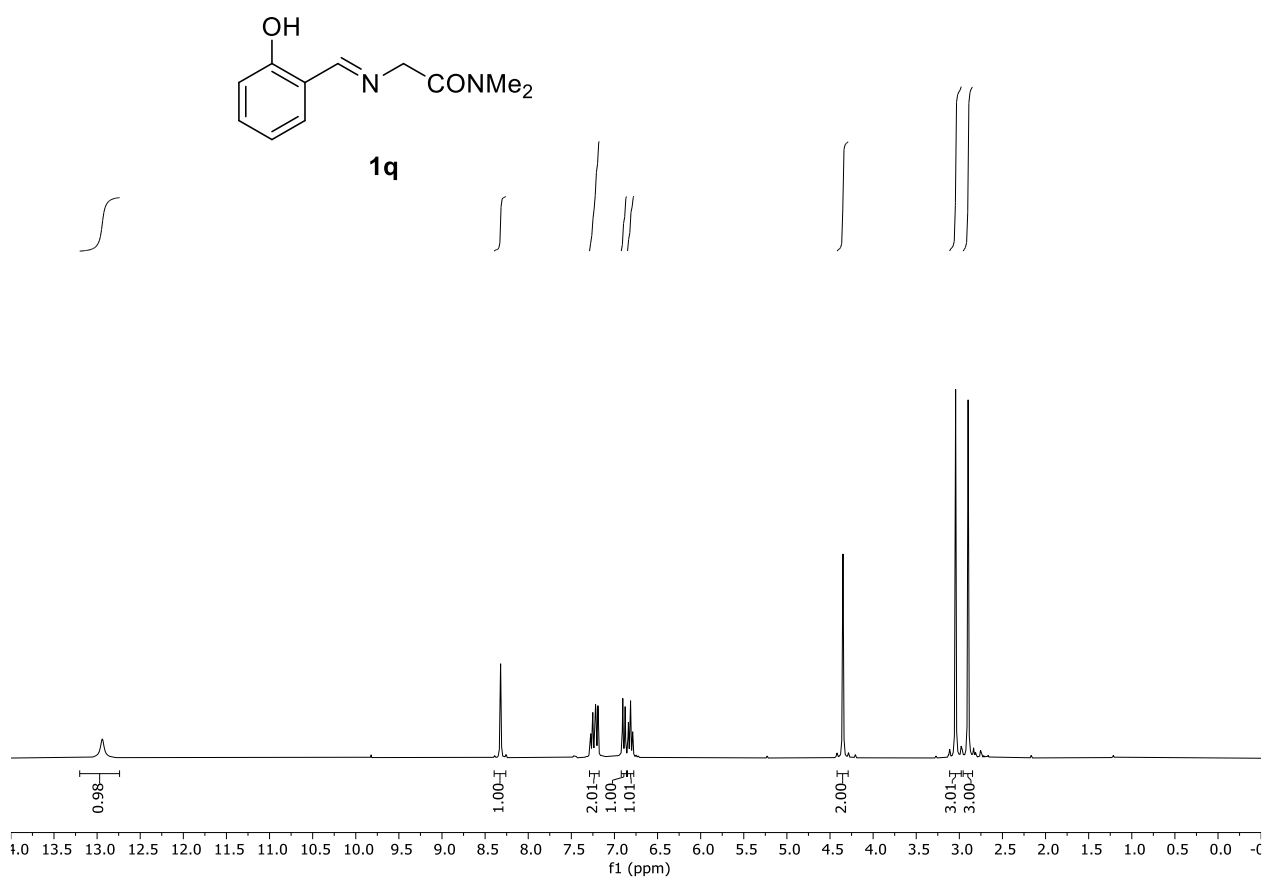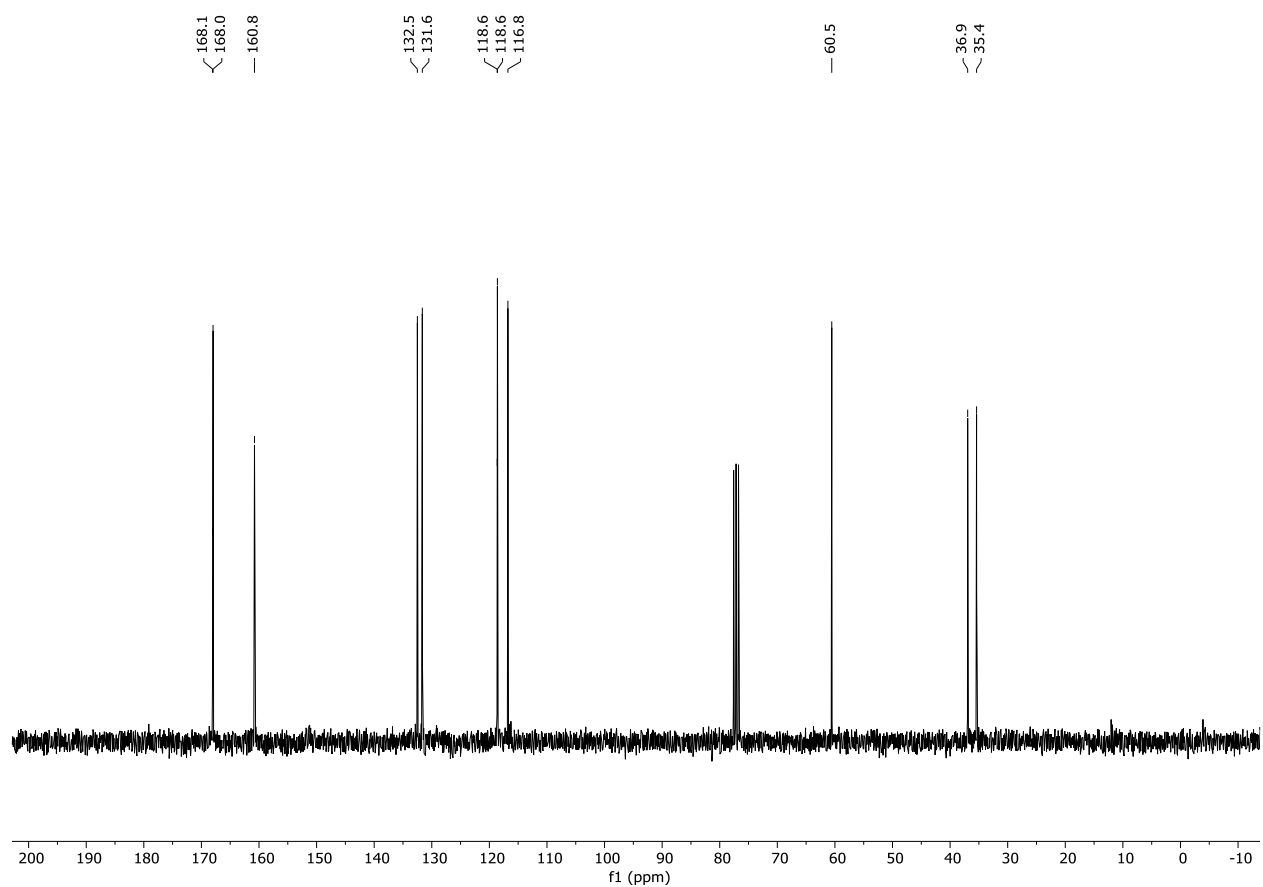

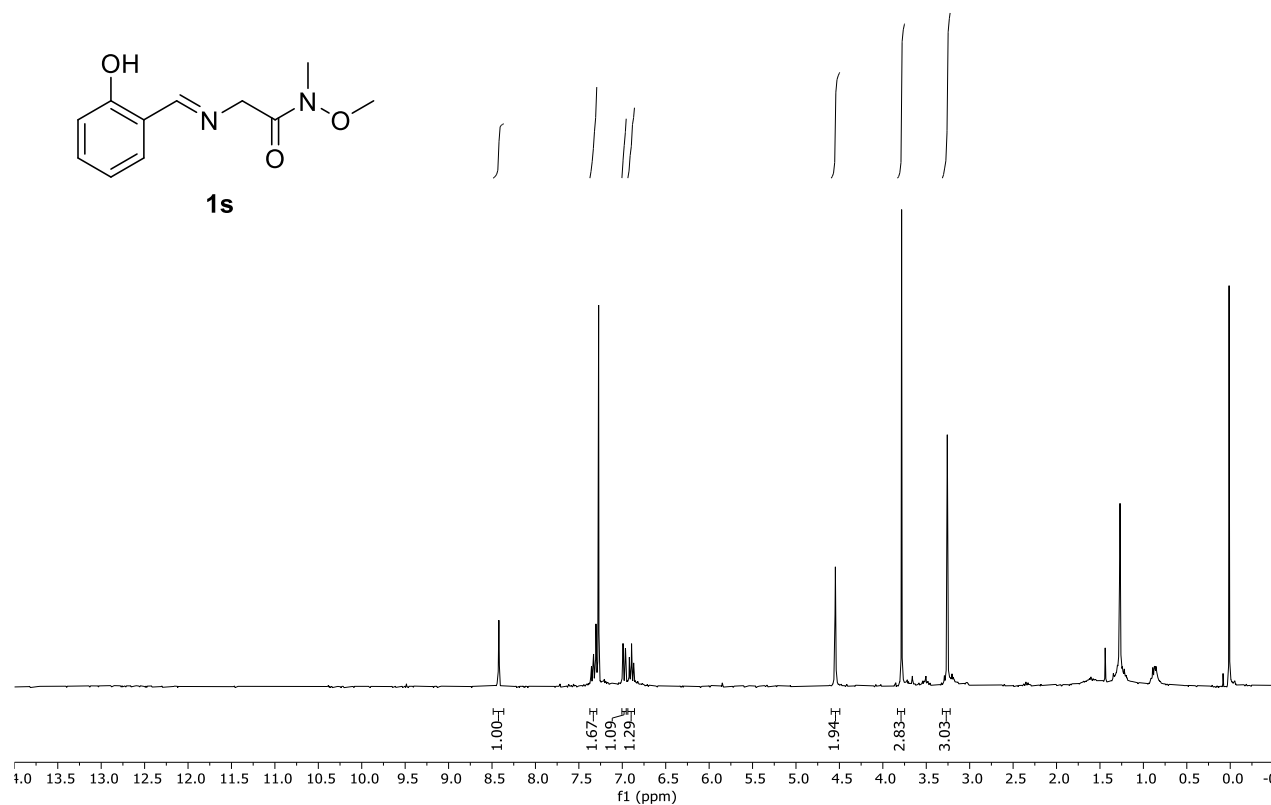

Figure S17. <sup>1</sup>H NMR spectrum (300 MHz, 298K, CDCl<sub>3</sub>) of **1s**.

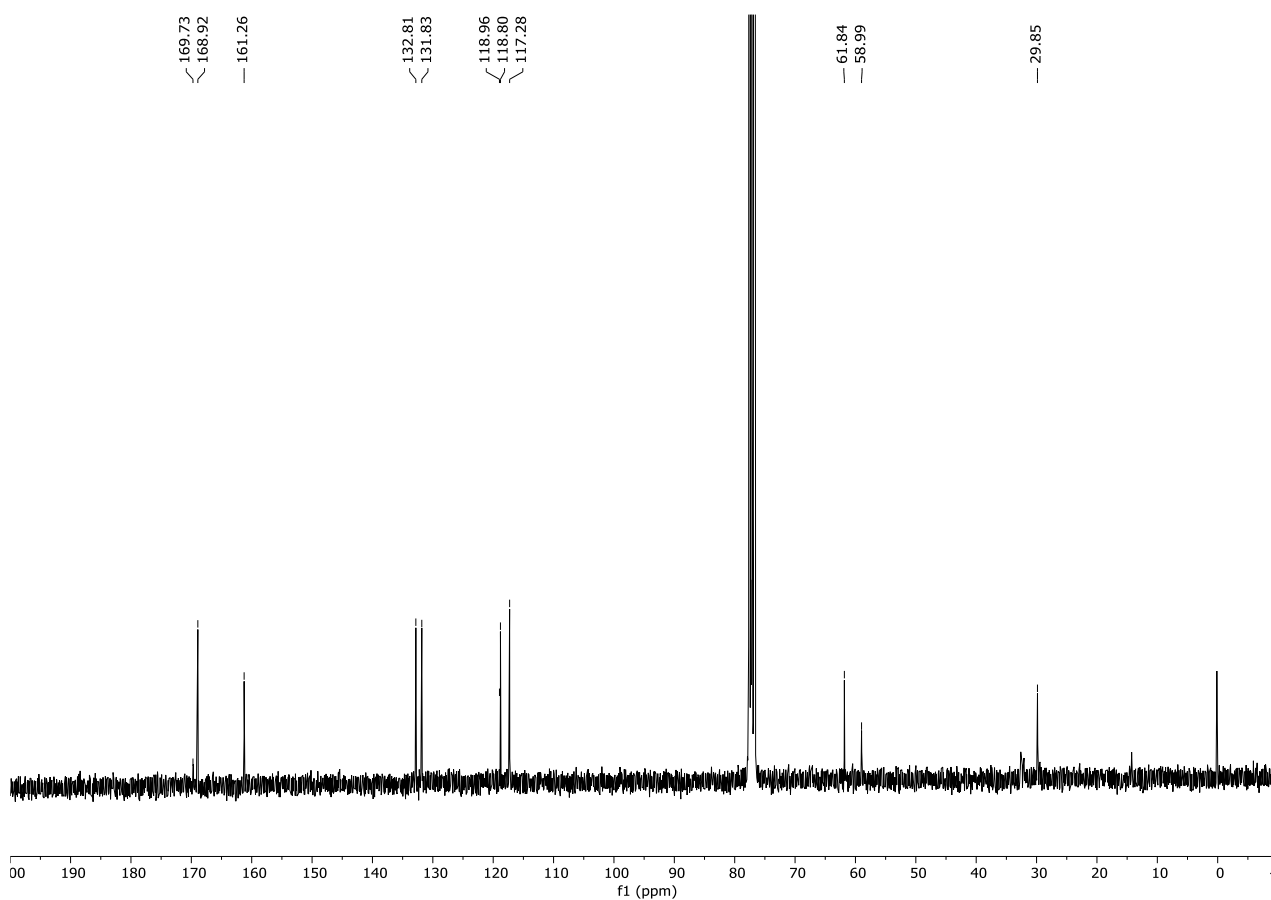

Figure S18. <sup>13</sup>C NMR spectrum (75 MHz, 298K, CDCl<sub>3</sub>) of **1s**

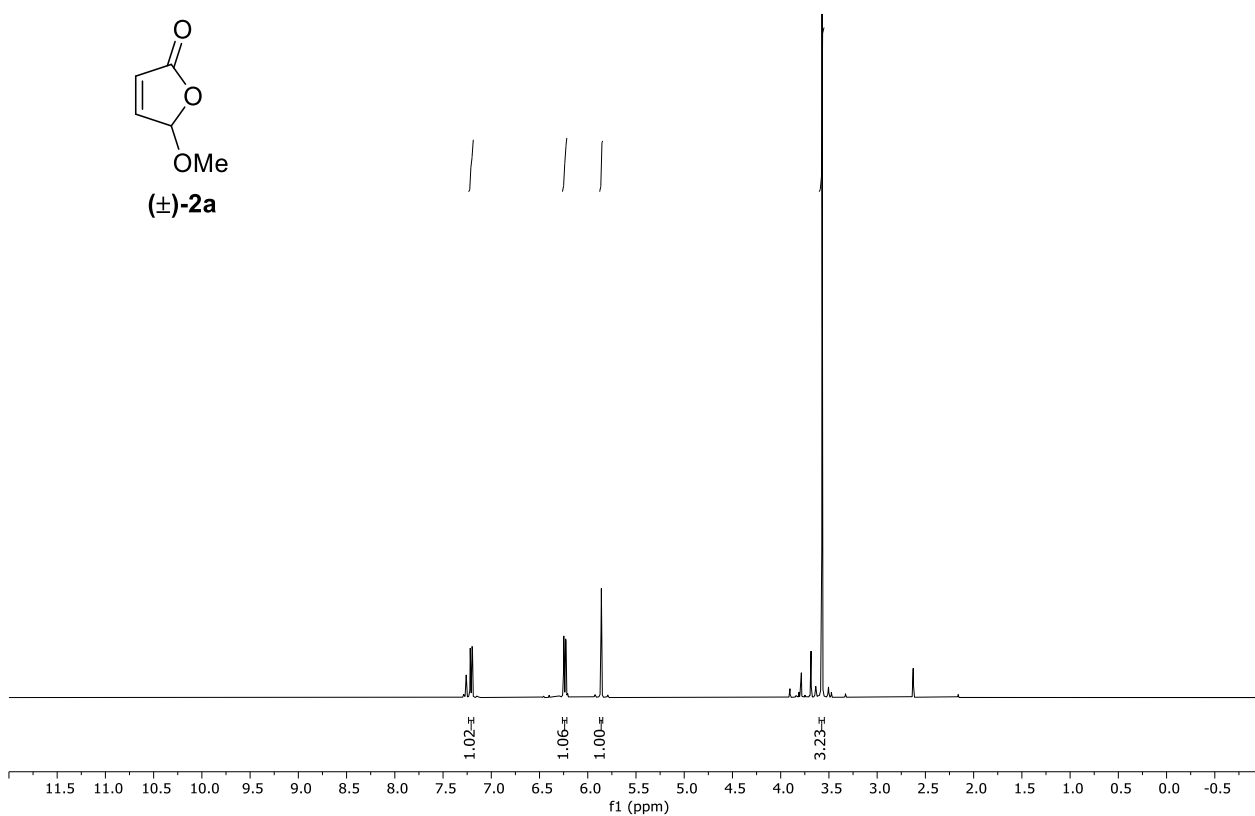

Figure S19. <sup>1</sup>H NMR spectrum (300 MHz, 298K, CDCl<sub>3</sub>) of (±)-2a.

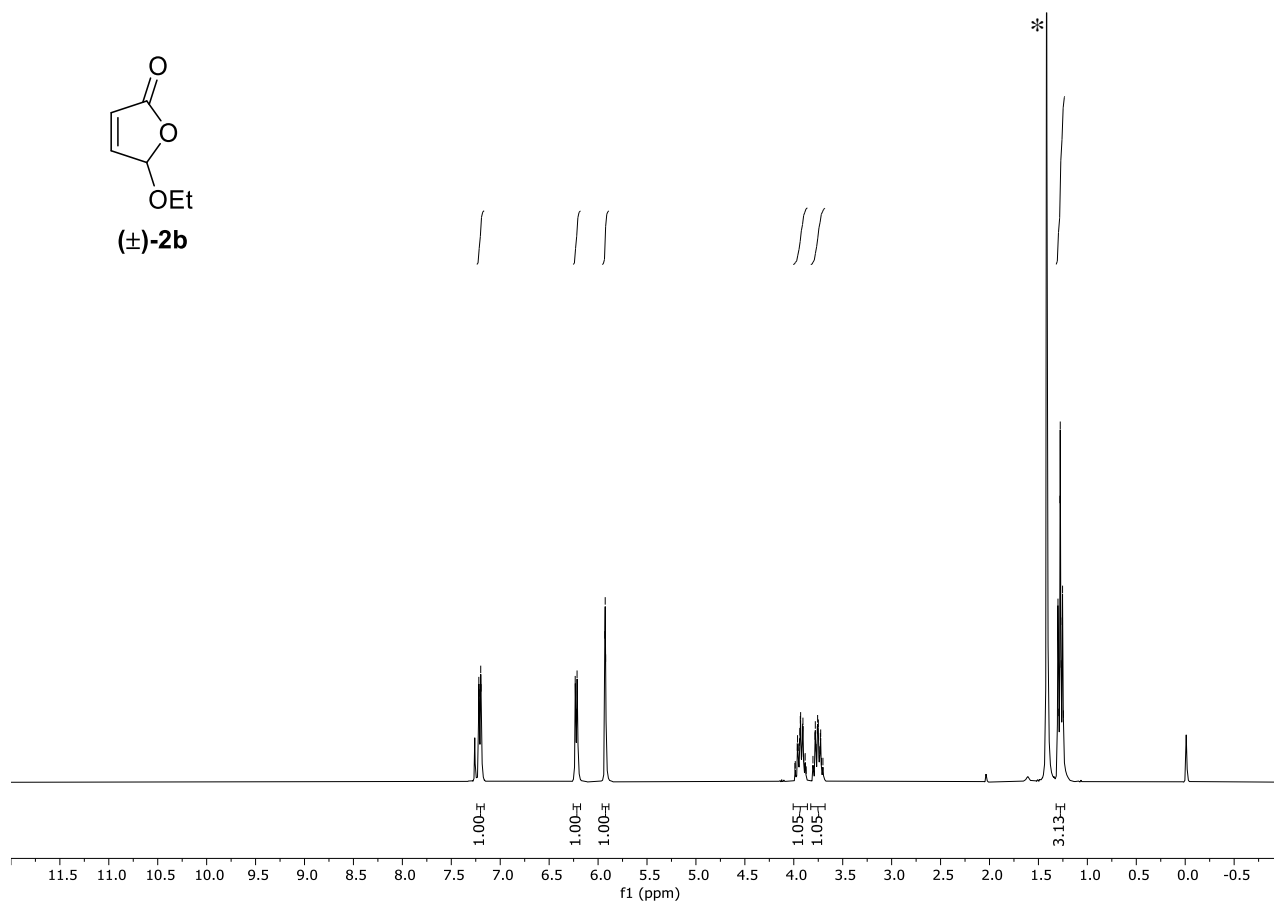

Figure S20. <sup>1</sup>H NMR spectrum (300 MHz, 298K, CDCl<sub>3</sub>) of (±)-2b (\*Cyclohexane solvent peak).

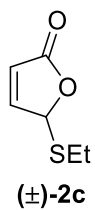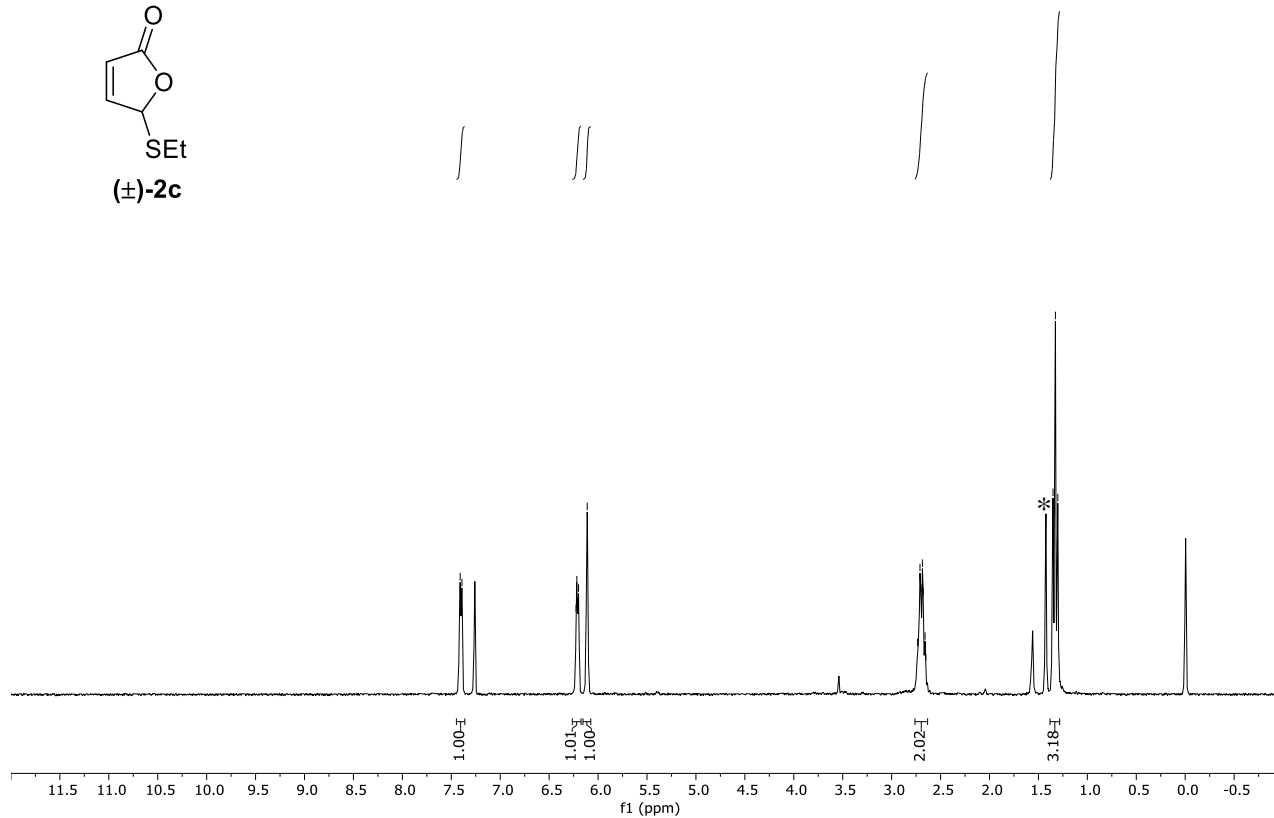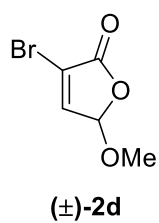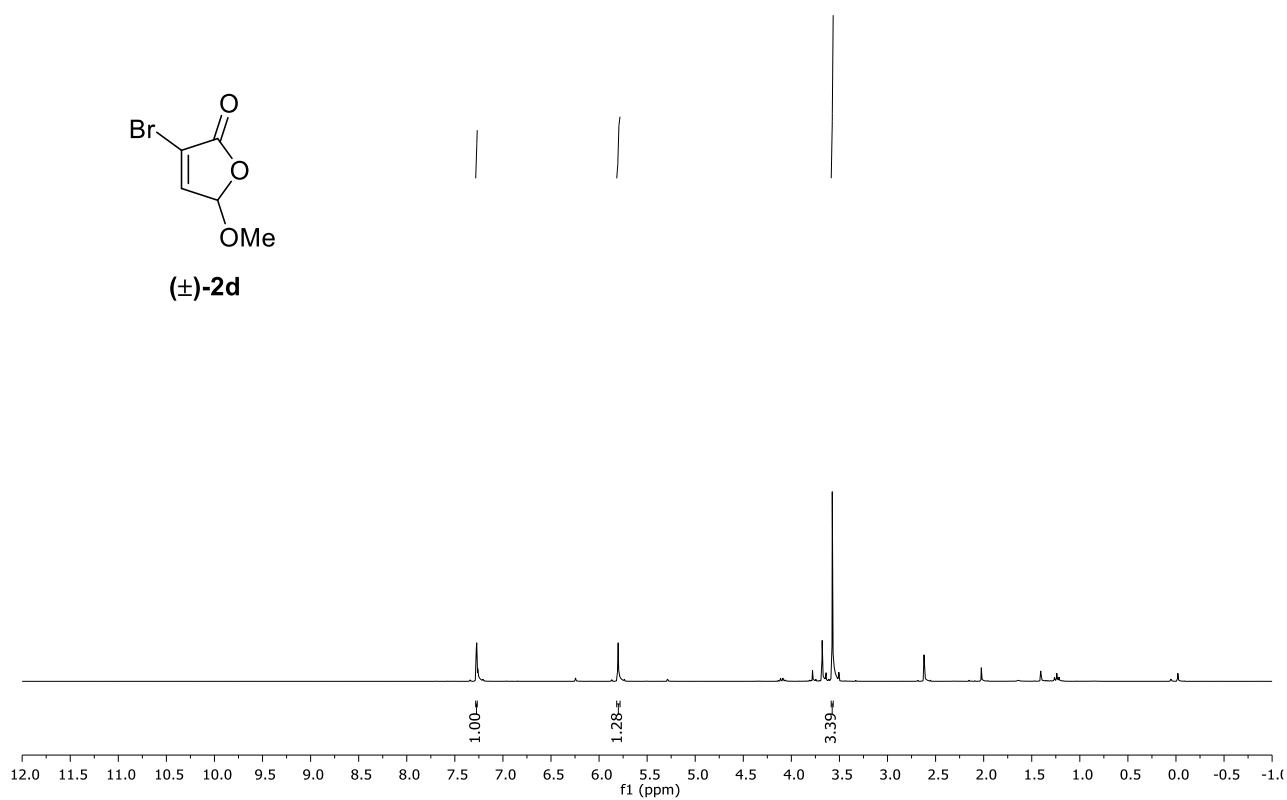

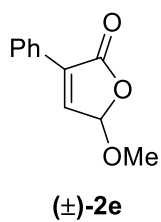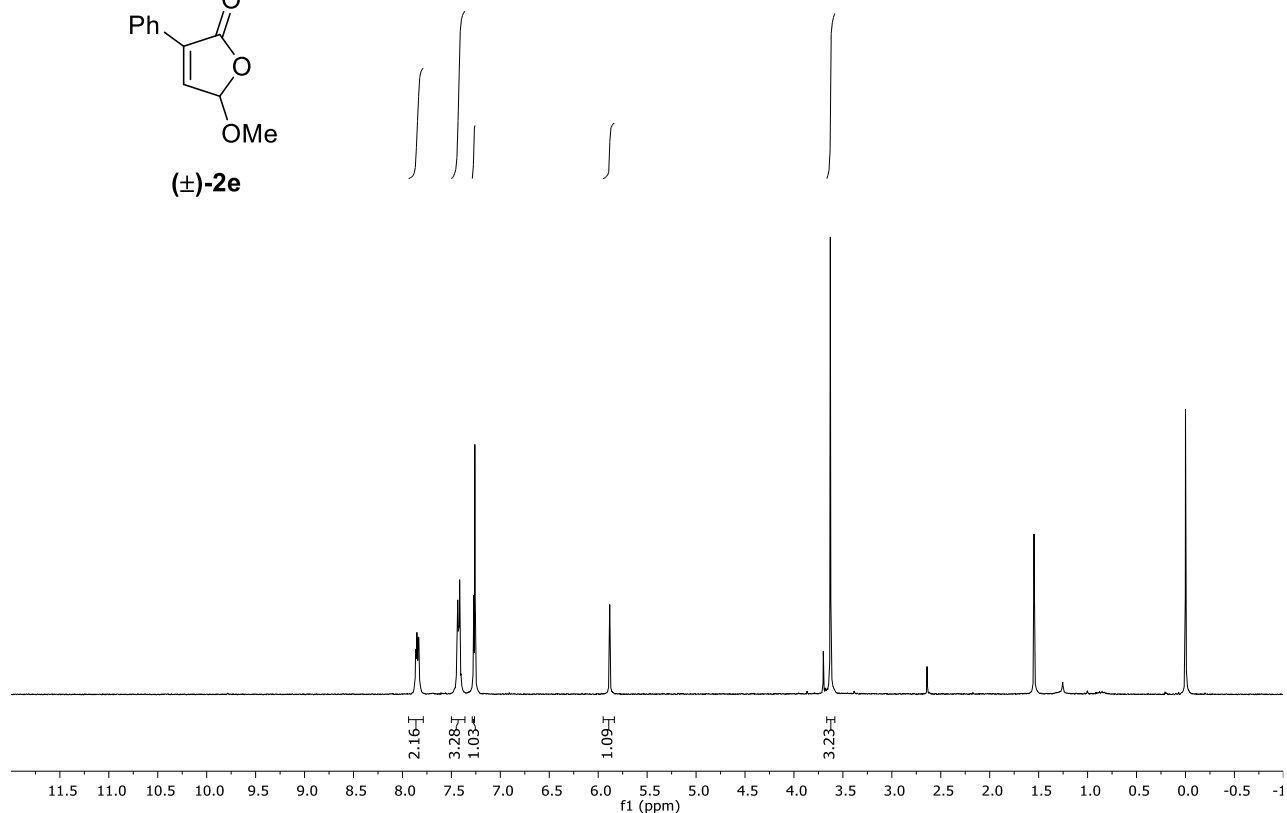

Figure S23. <sup>1</sup>H NMR spectrum (300 MHz, 298K, CDCl<sub>3</sub>) of (±)-2e.

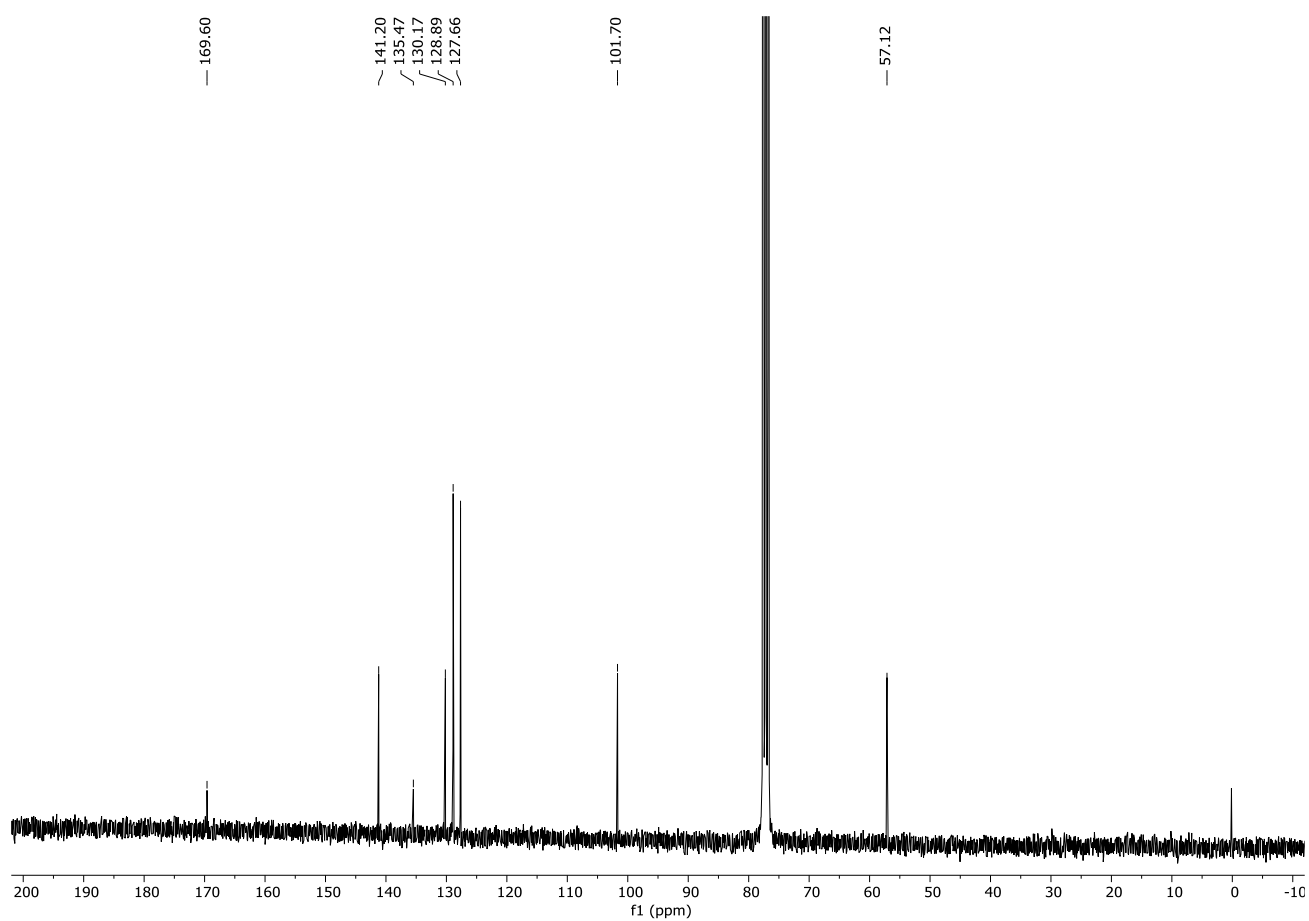

Figure S24. <sup>13</sup>C NMR spectrum (75 MHz, 298K, CDCl<sub>3</sub>) of (±)-2e.

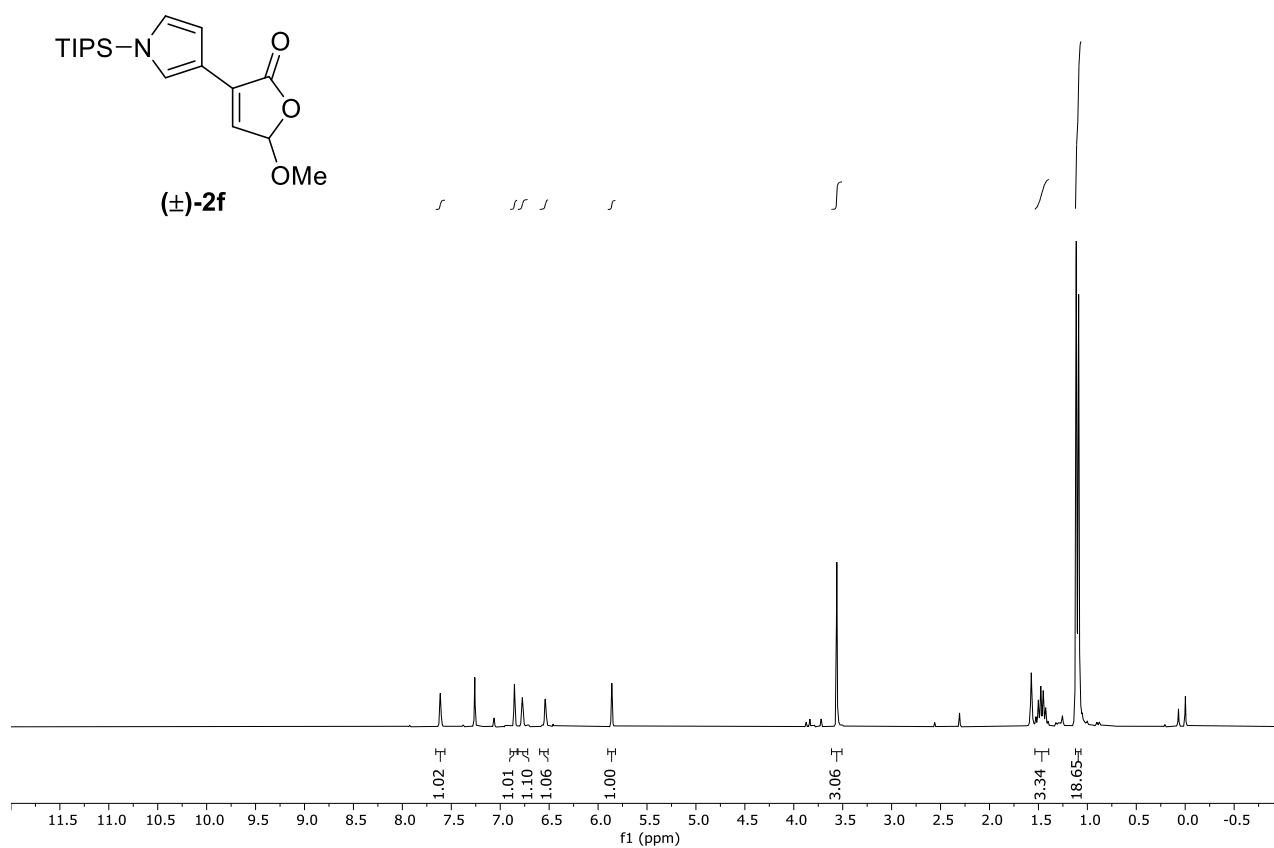

Figure S25. <sup>1</sup>H NMR spectrum (300 MHz, 298K, CDCl<sub>3</sub>) of (±)-2f.

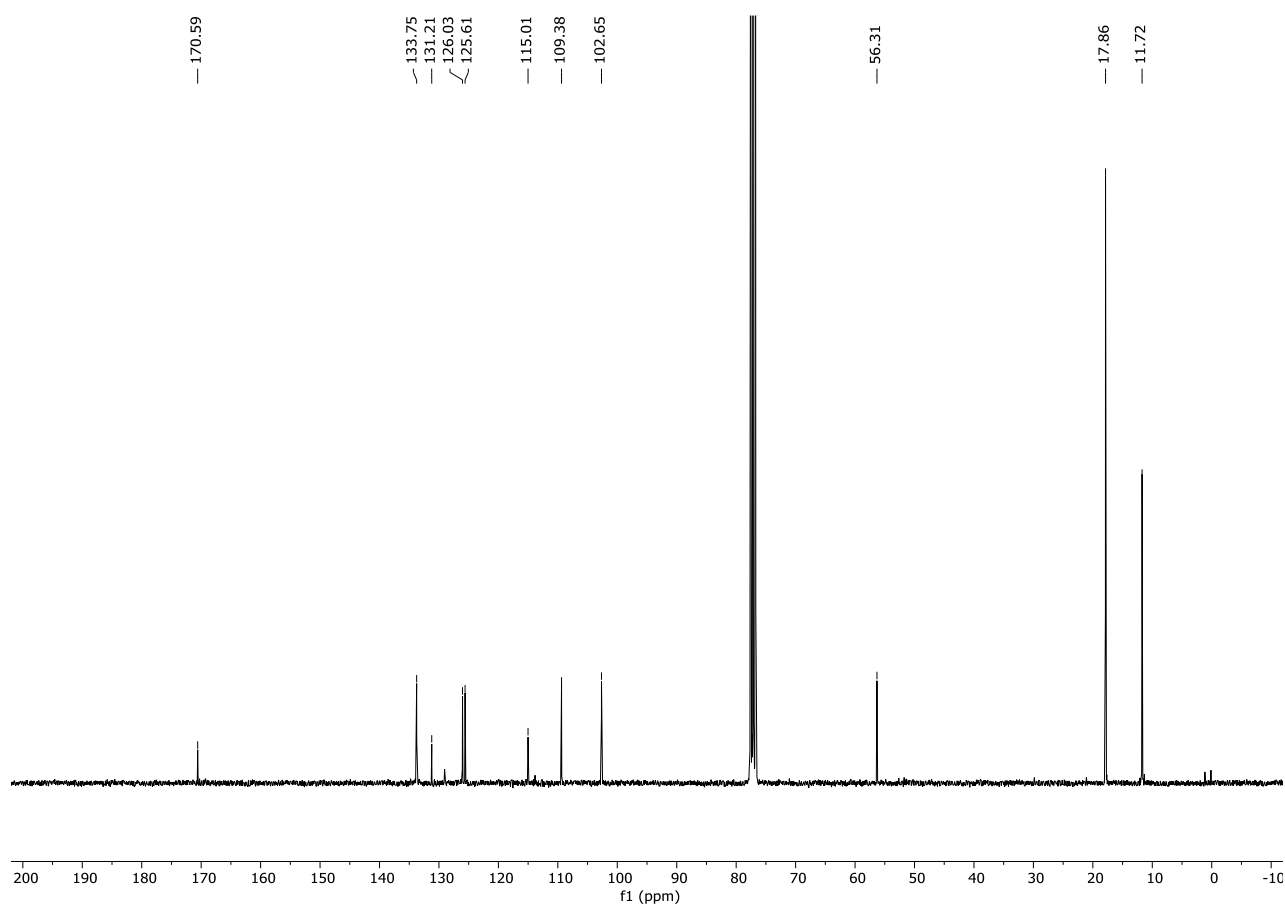

Figure S26. <sup>13</sup>C NMR spectrum (75 MHz, 298K, CDCl<sub>3</sub>) of (±)-2f.

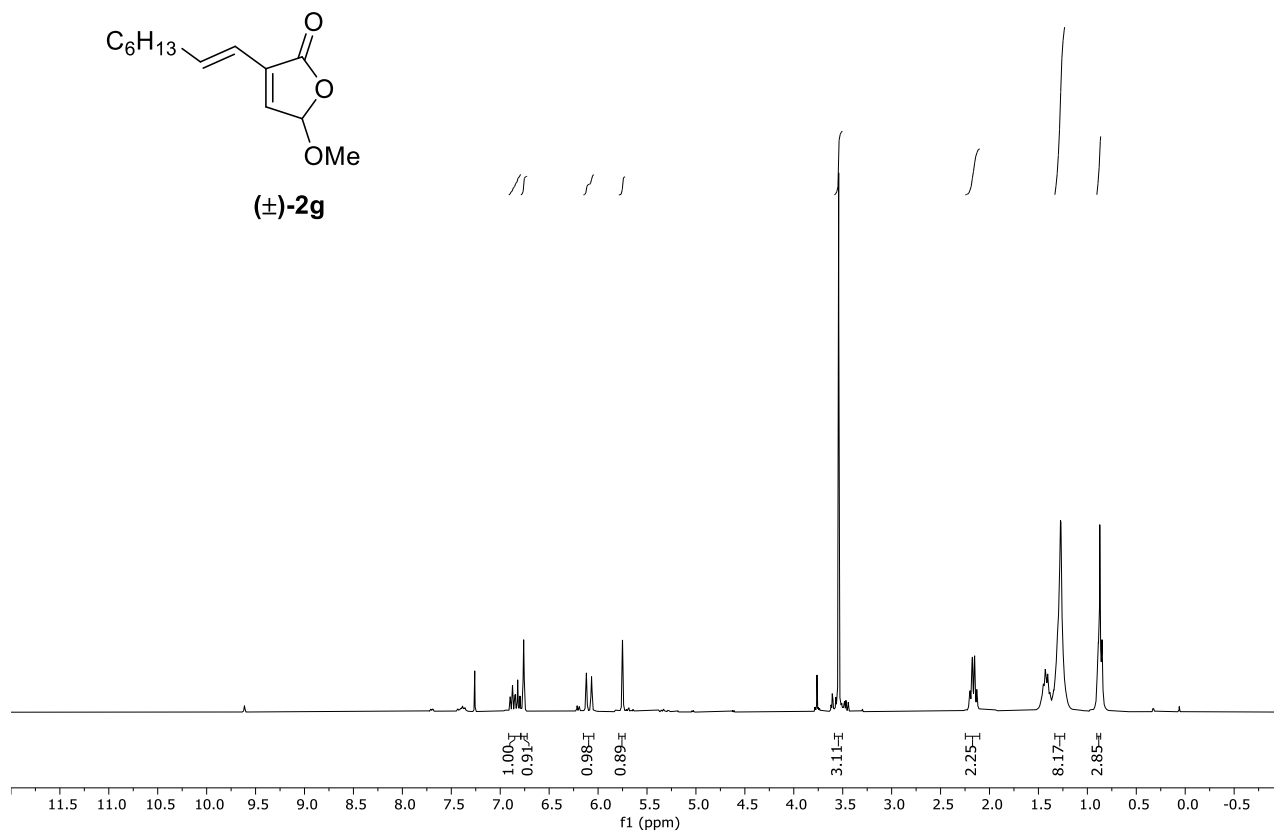

**Figure S27.** <sup>1</sup>H NMR spectrum (300 MHz, 298K, CDCl<sub>3</sub>) of **(±)-2g**.

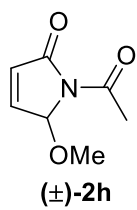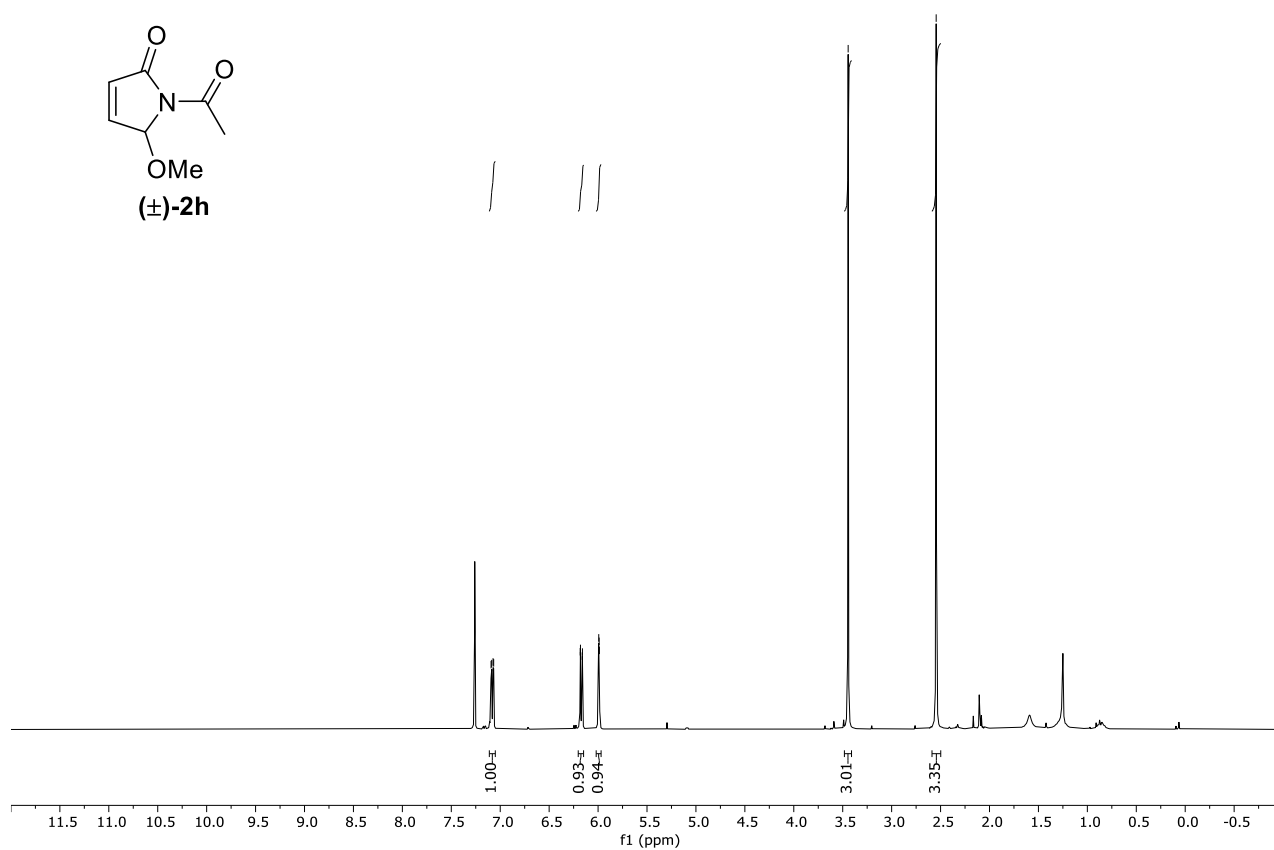

Figure S28.  $^1\text{H}$  NMR spectrum (300 MHz, 298K,  $\text{CDCl}_3$ ) of (±)-2h.

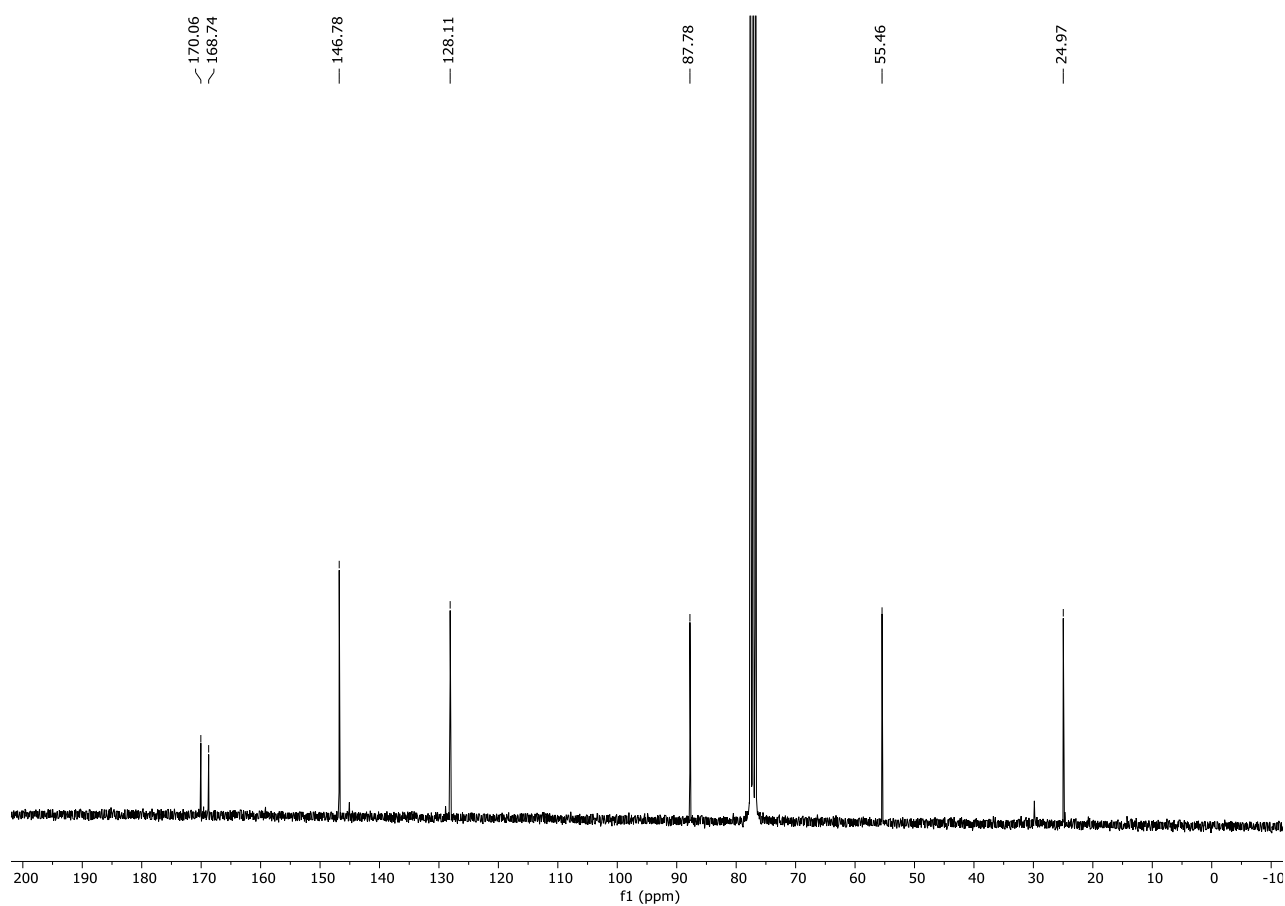

Figure S29.  $^{13}\text{C}$  NMR spectrum (75 MHz, 298K,  $\text{CDCl}_3$ ) of (±)-2h.

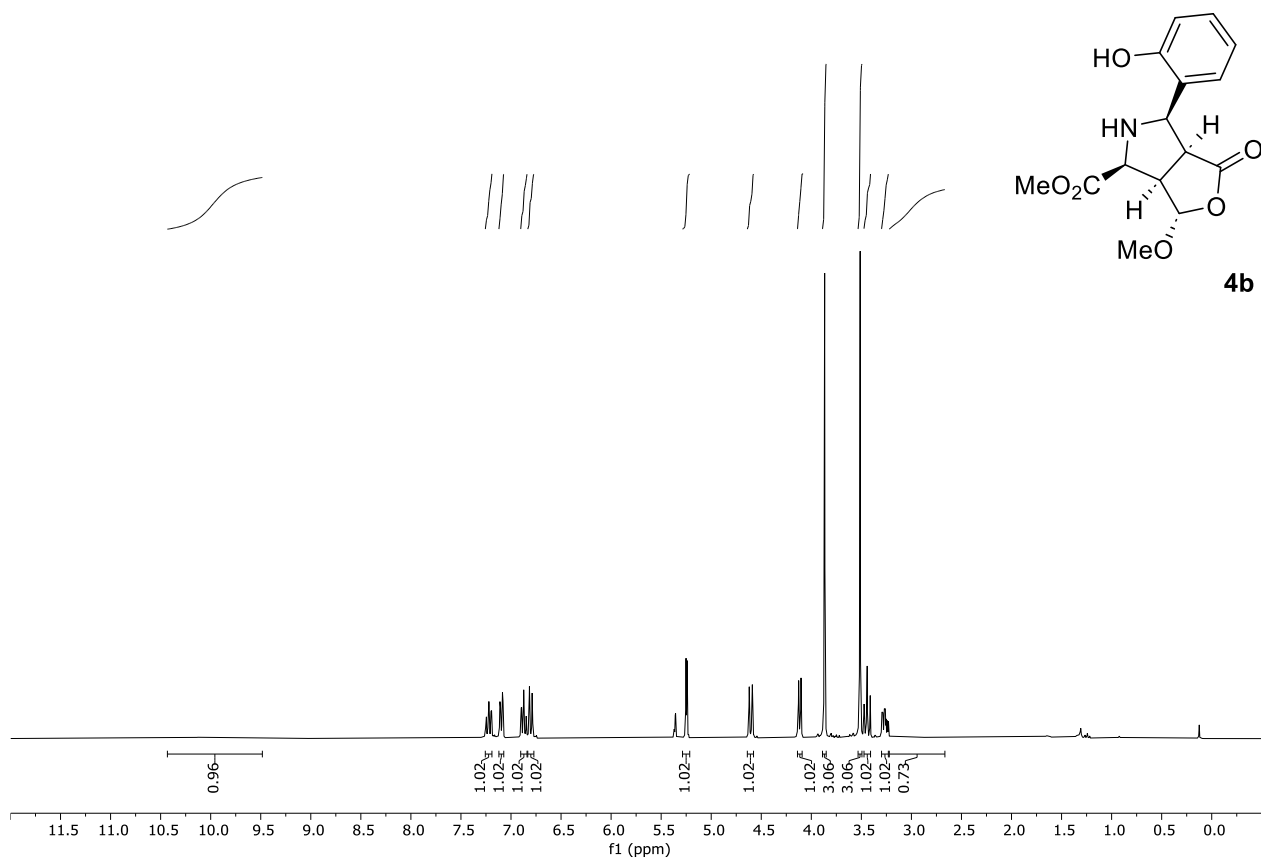

**Figure S30.** <sup>1</sup>H NMR spectrum (300 MHz, 298K, CD<sub>2</sub>Cl<sub>2</sub>) of **4b**.

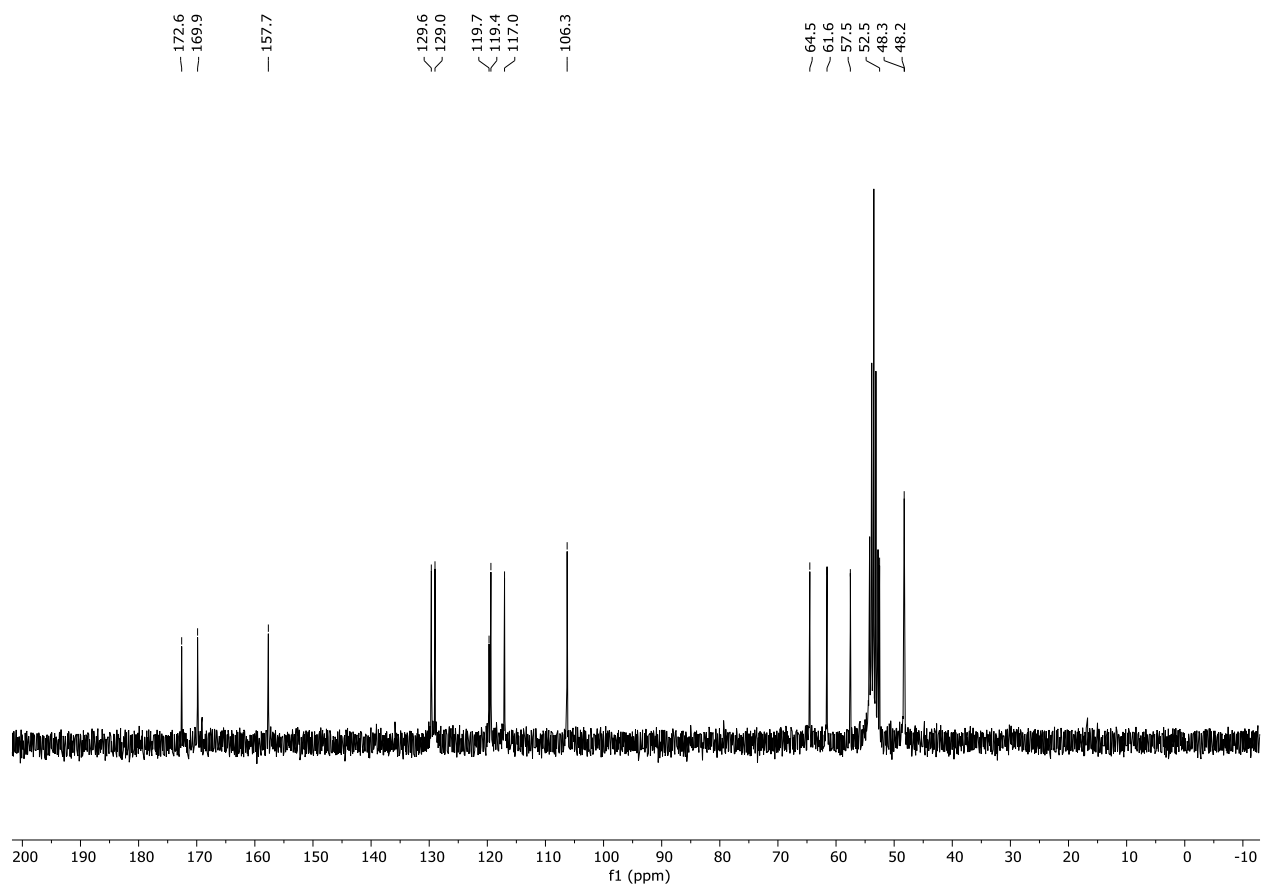

**Figure S31.** <sup>13</sup>C NMR spectrum (75 MHz, 298K, CD<sub>2</sub>Cl<sub>2</sub>) of **4b**.

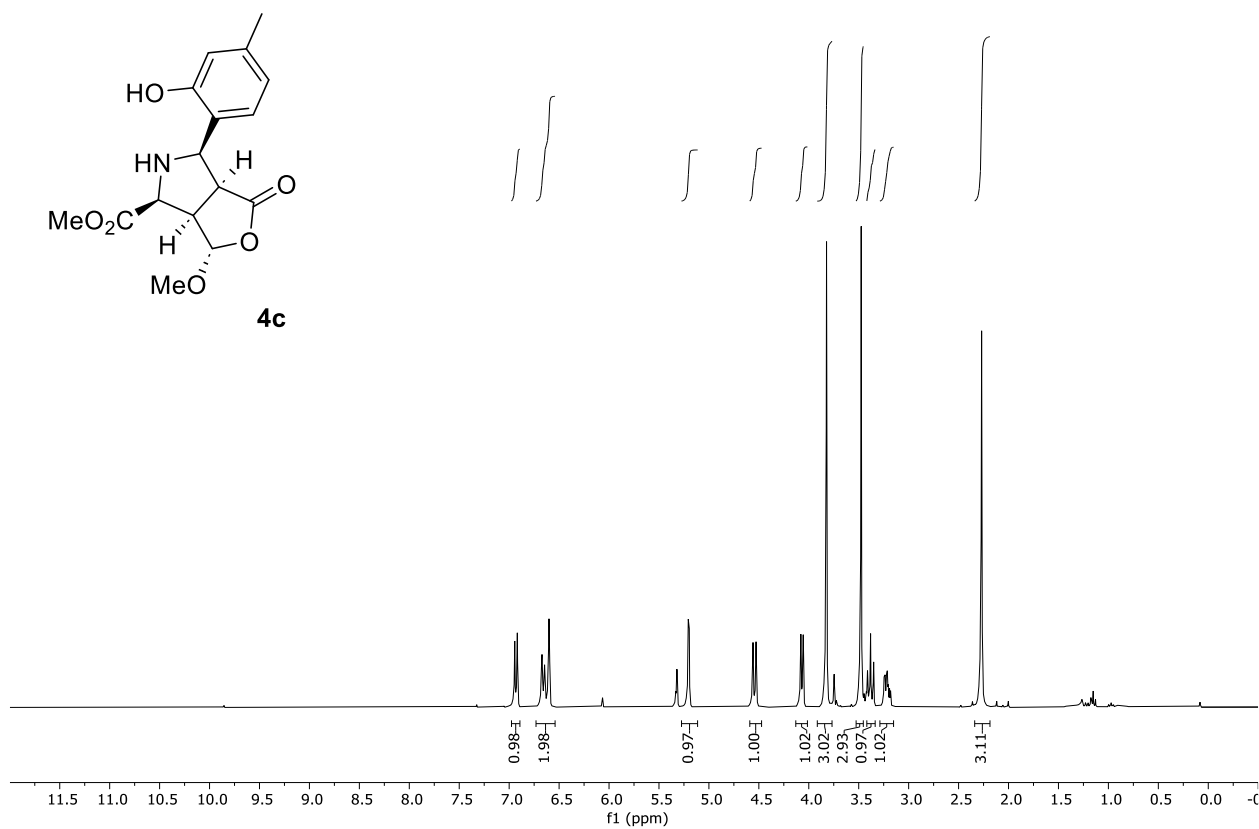

**Figure S32.** <sup>1</sup>H NMR spectrum (300 MHz, 298K, CD<sub>2</sub>Cl<sub>2</sub>) of **4c**.

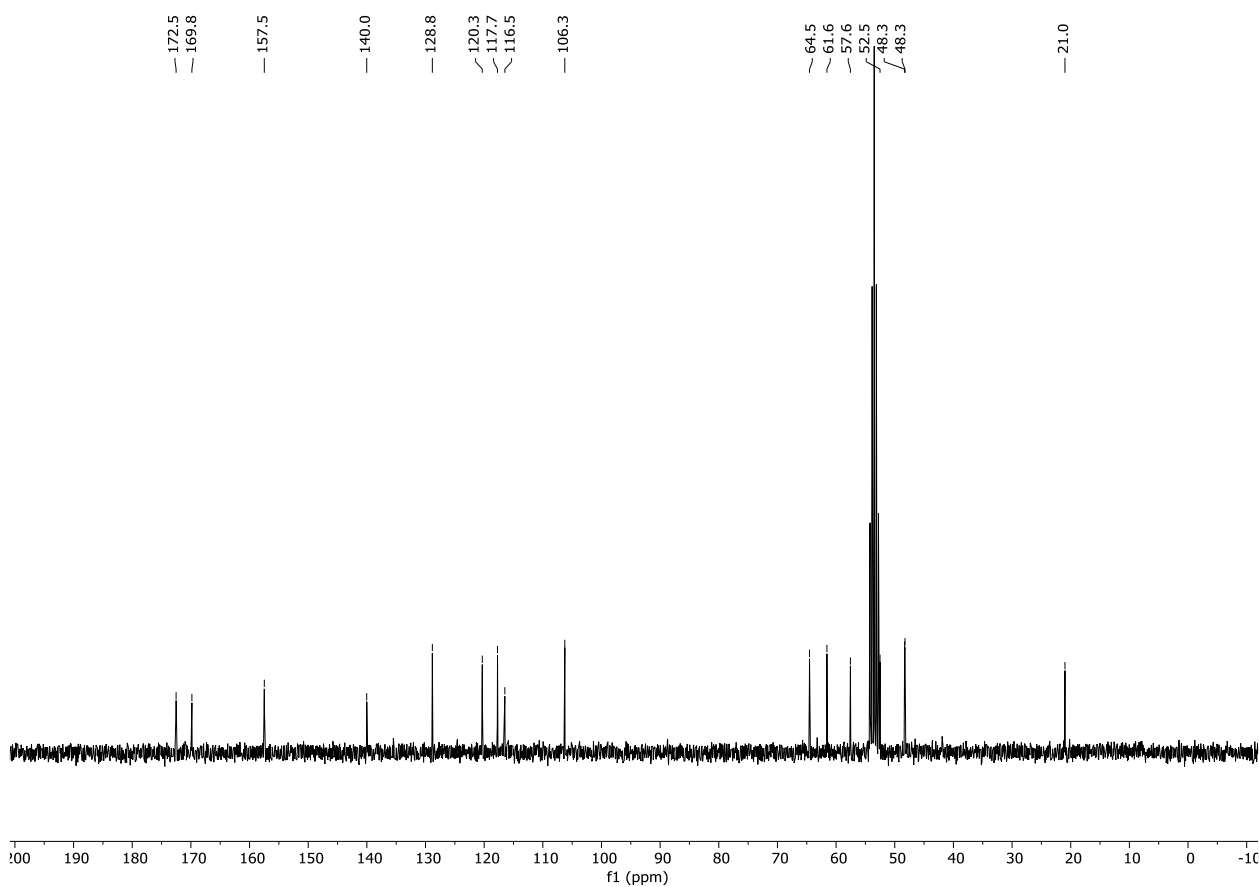

**Figure S33.** <sup>13</sup>C NMR spectrum (75 MHz, 298K, CD<sub>2</sub>Cl<sub>2</sub>) of **4c**.

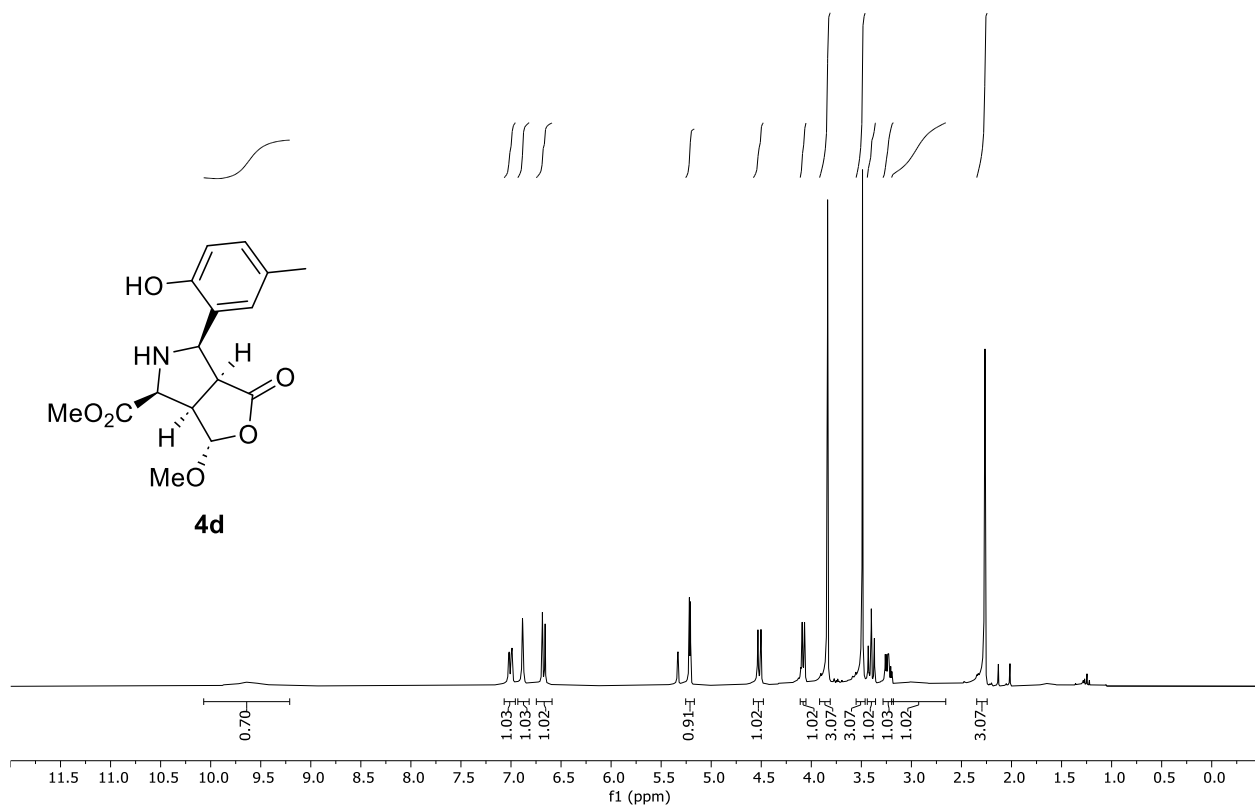

**Figure S34.** <sup>1</sup>H NMR spectrum (300 MHz, 298K, CD<sub>2</sub>Cl<sub>2</sub>) of **4d**.

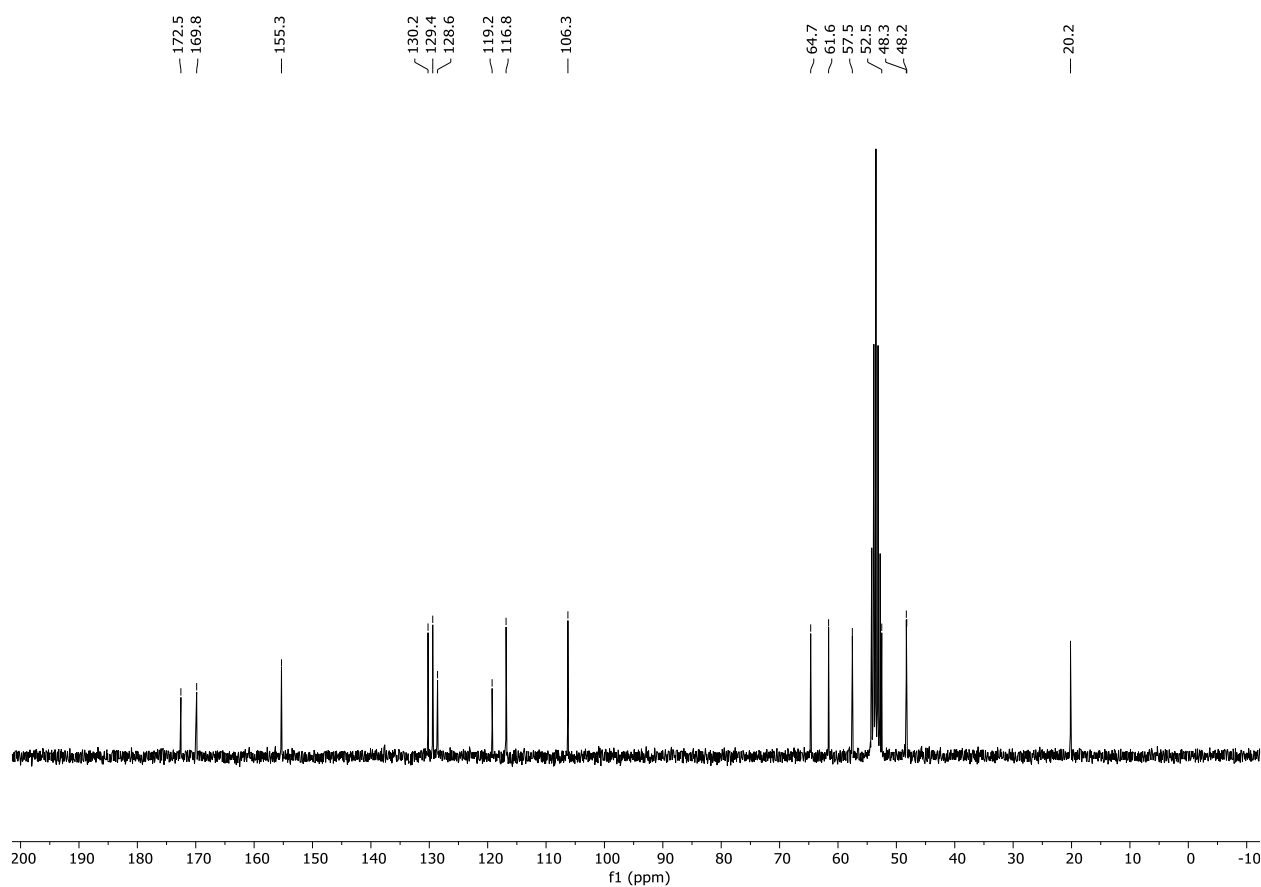

**Figure S35.** <sup>13</sup>C NMR spectrum (75 MHz, 298K, CD<sub>2</sub>Cl<sub>2</sub>) of **4d**.

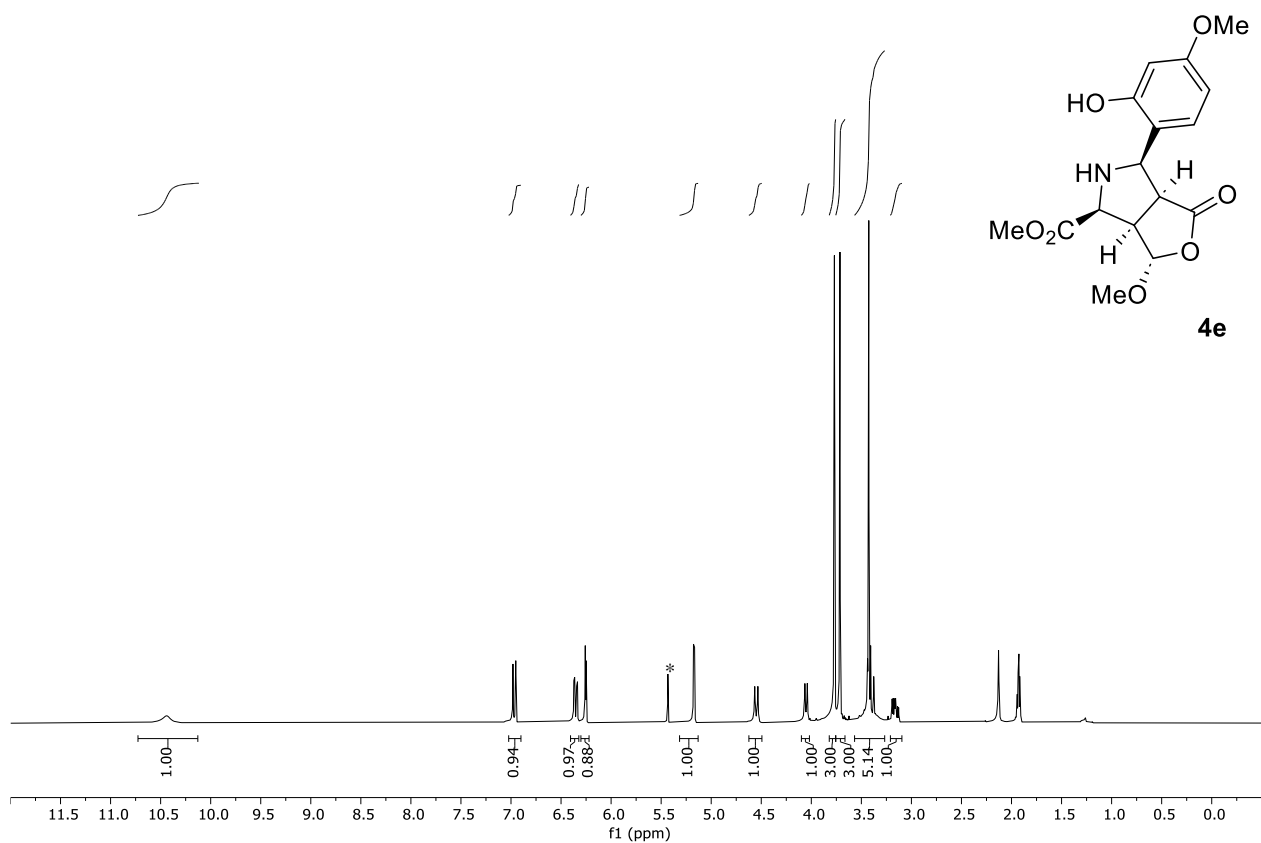

**Figure S36.** <sup>1</sup>H NMR spectrum (300 MHz, 298K, CD<sub>3</sub>CN) of **4e** (CH<sub>2</sub>Cl<sub>2</sub> solvent peak).

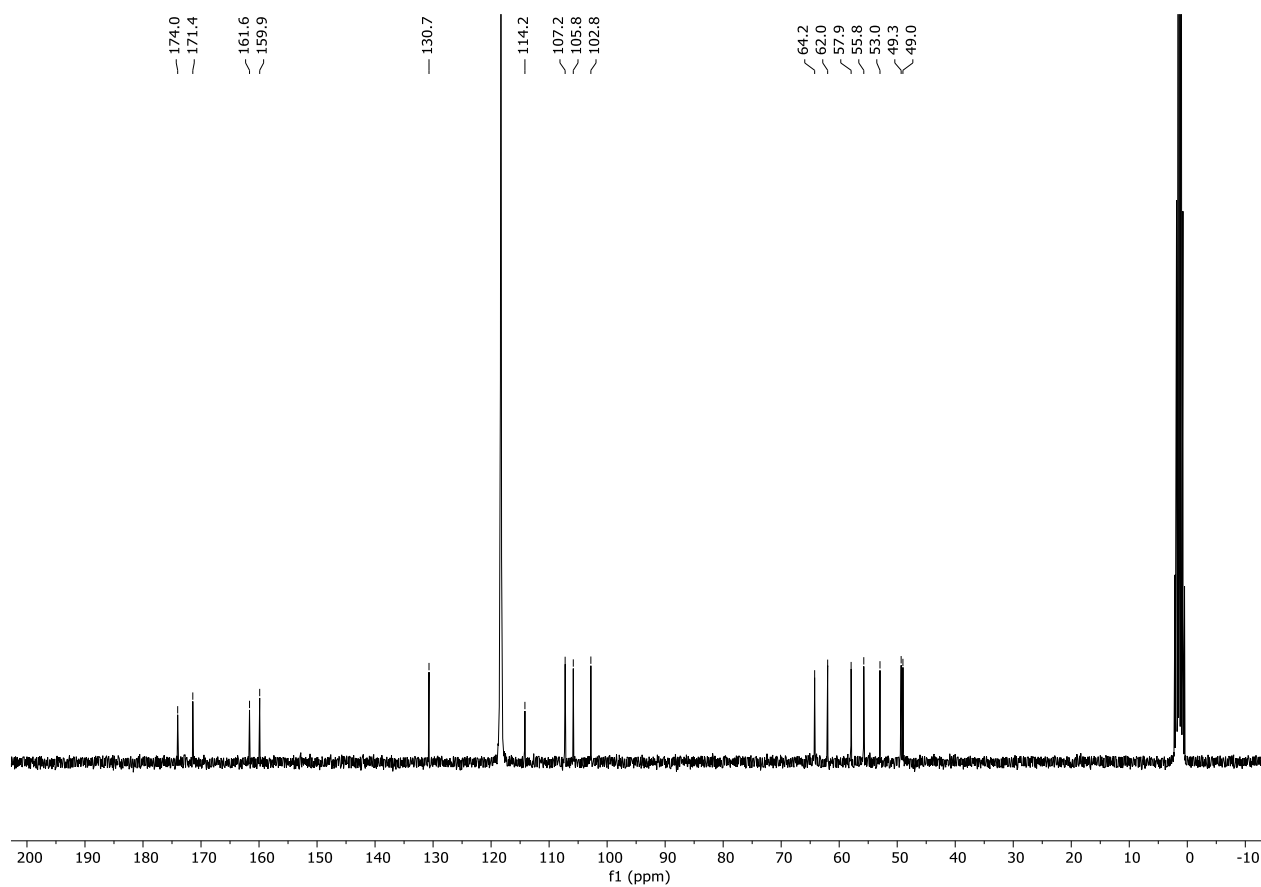

**Figure S37.** <sup>13</sup>C NMR spectrum (75 MHz, 298K, CD<sub>3</sub>CN) of **4e**.

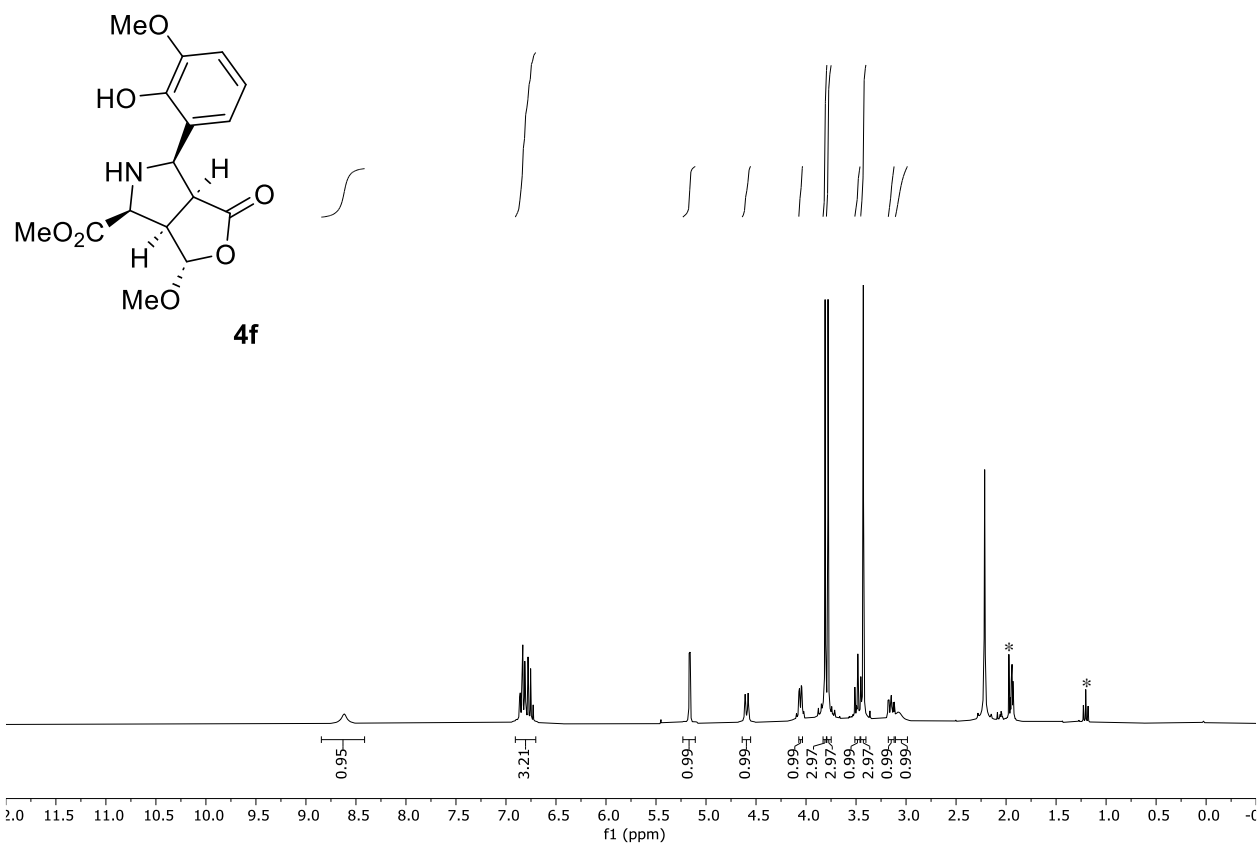

**Figure S38.** <sup>1</sup>H NMR spectrum (300 MHz, 298K, CD<sub>3</sub>CN) of **4f** (\*AcOEt solvent peaks).

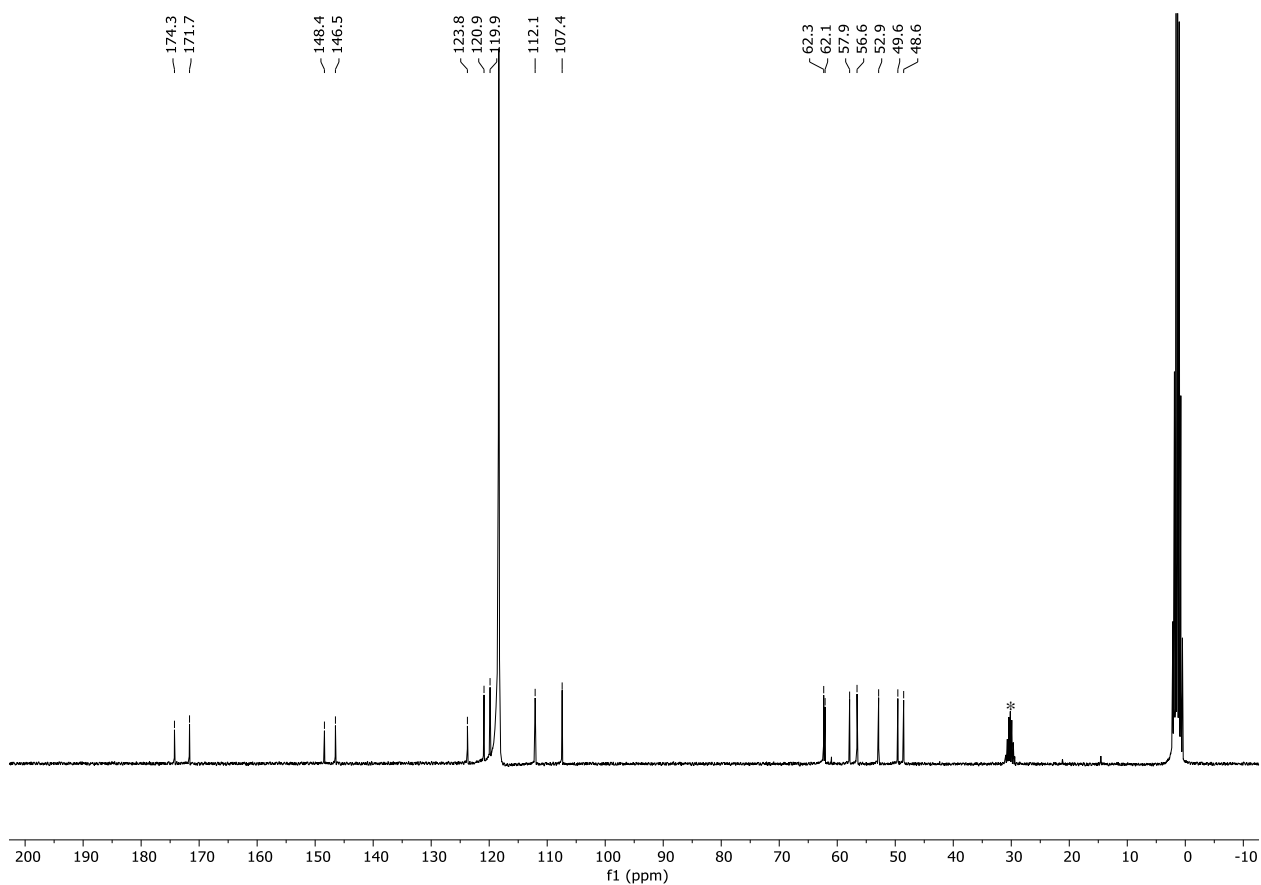

**Figure S39.** <sup>13</sup>C NMR spectrum (76 MHz, 298K, CD<sub>3</sub>CN) of **4f** (\*((CD<sub>3</sub>)<sub>2</sub>CO solvent peak).

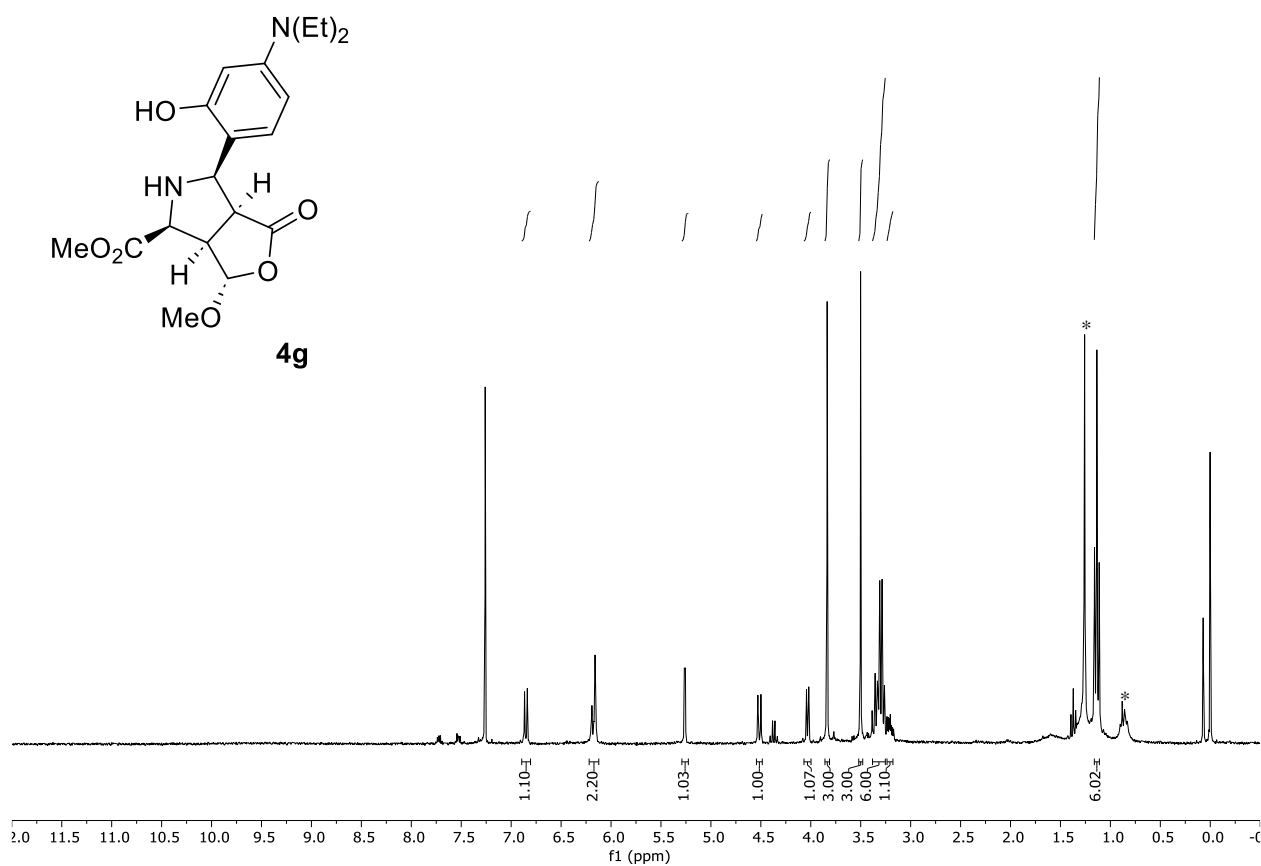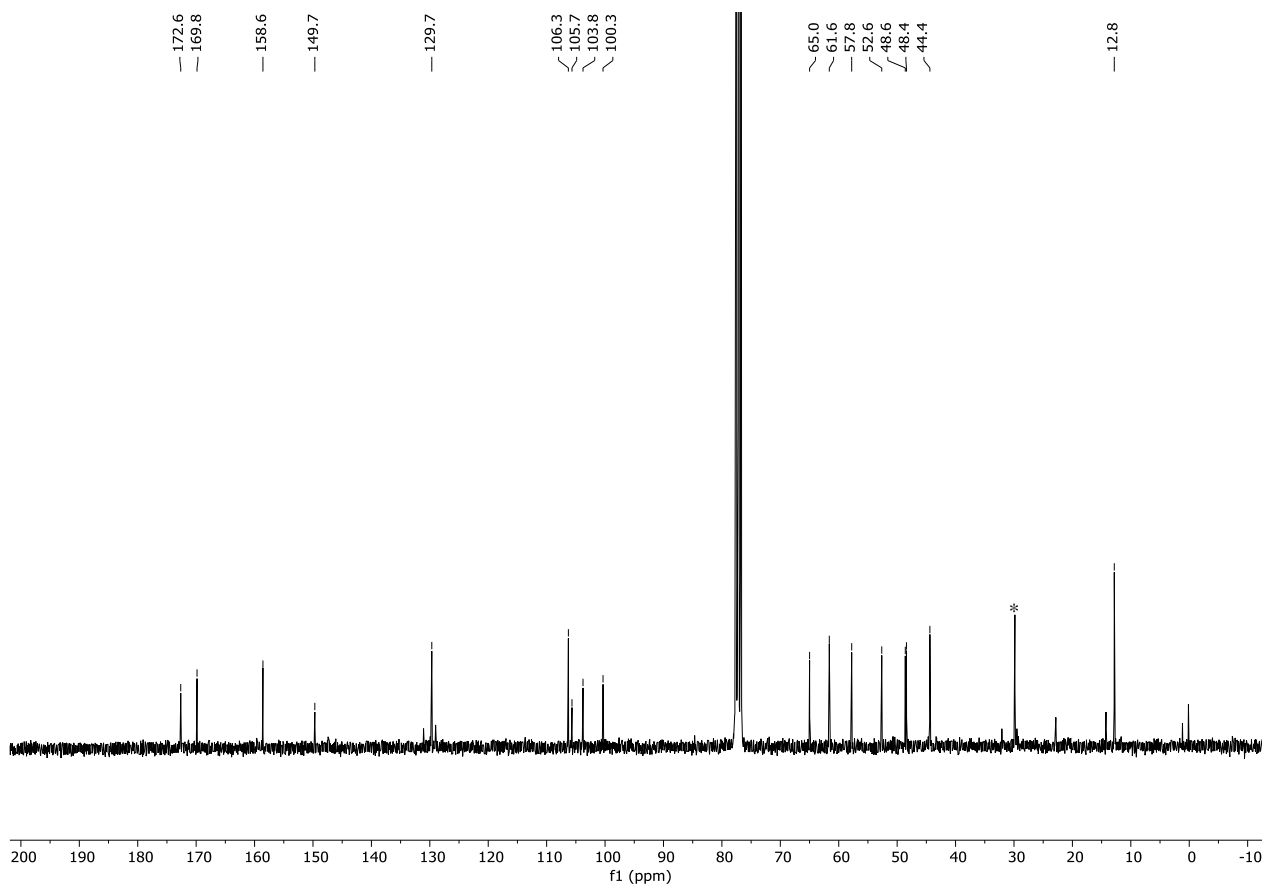

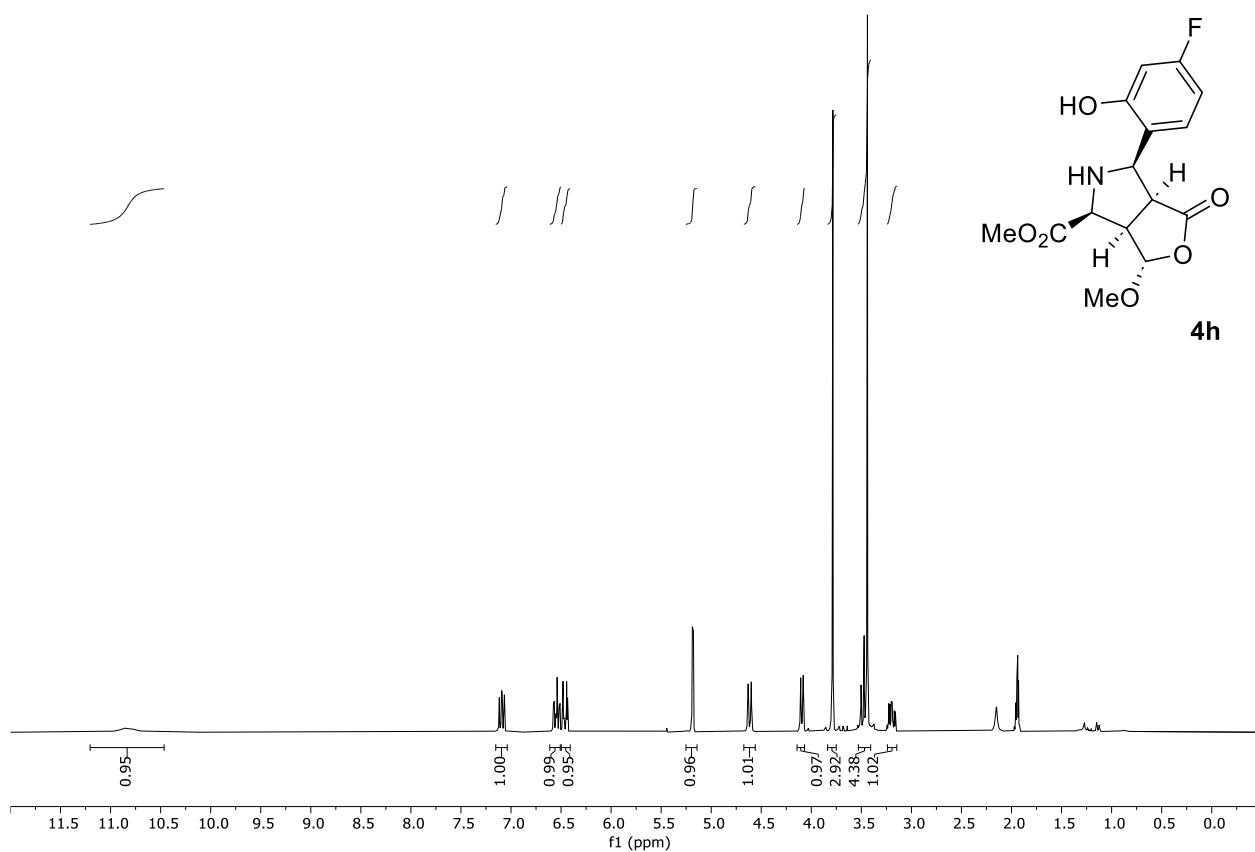

Figure S42. <sup>1</sup>H NMR spectrum (300 MHz, 298K, CD<sub>3</sub>CN) of **4h**.

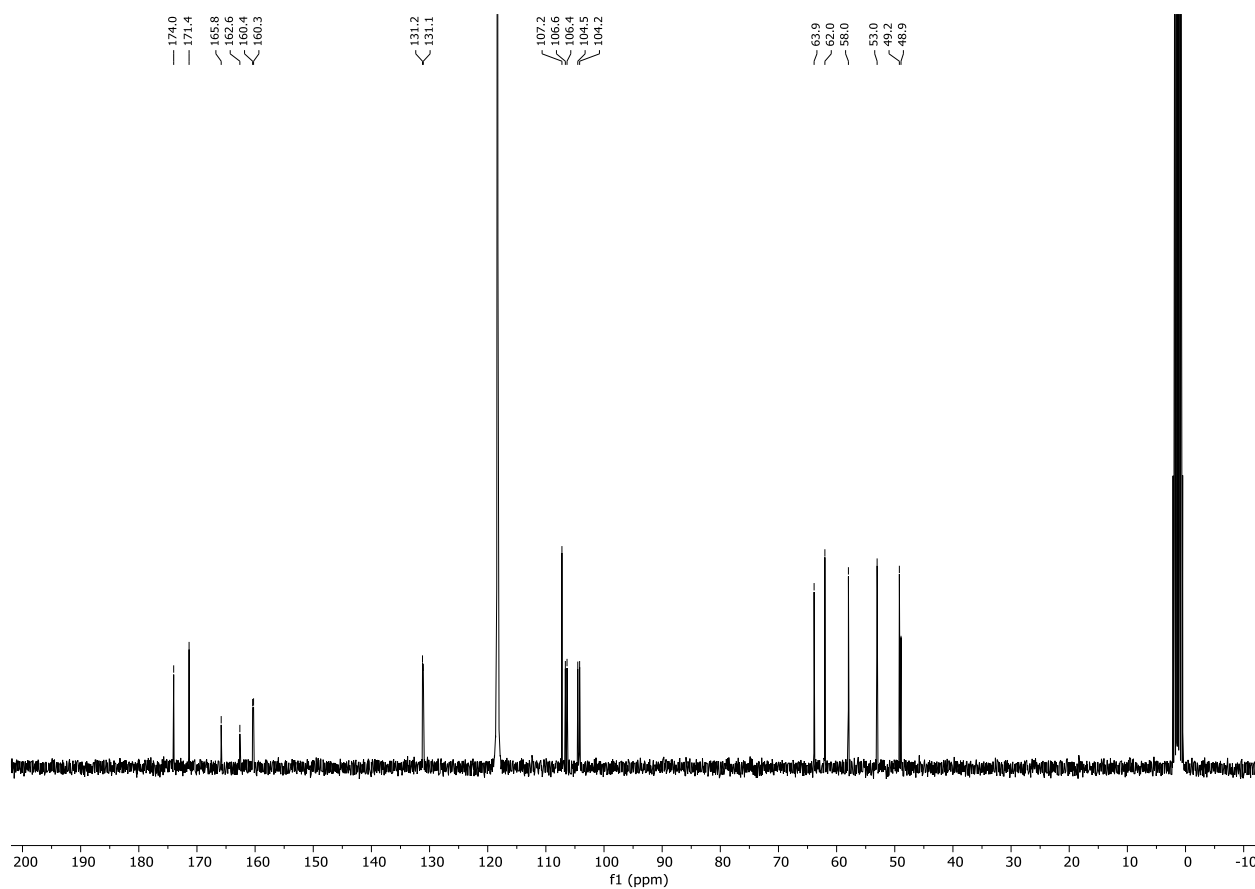

Figure S43. <sup>13</sup>C NMR spectrum (75 MHz, 298K, CD<sub>3</sub>CN) of **4h**.

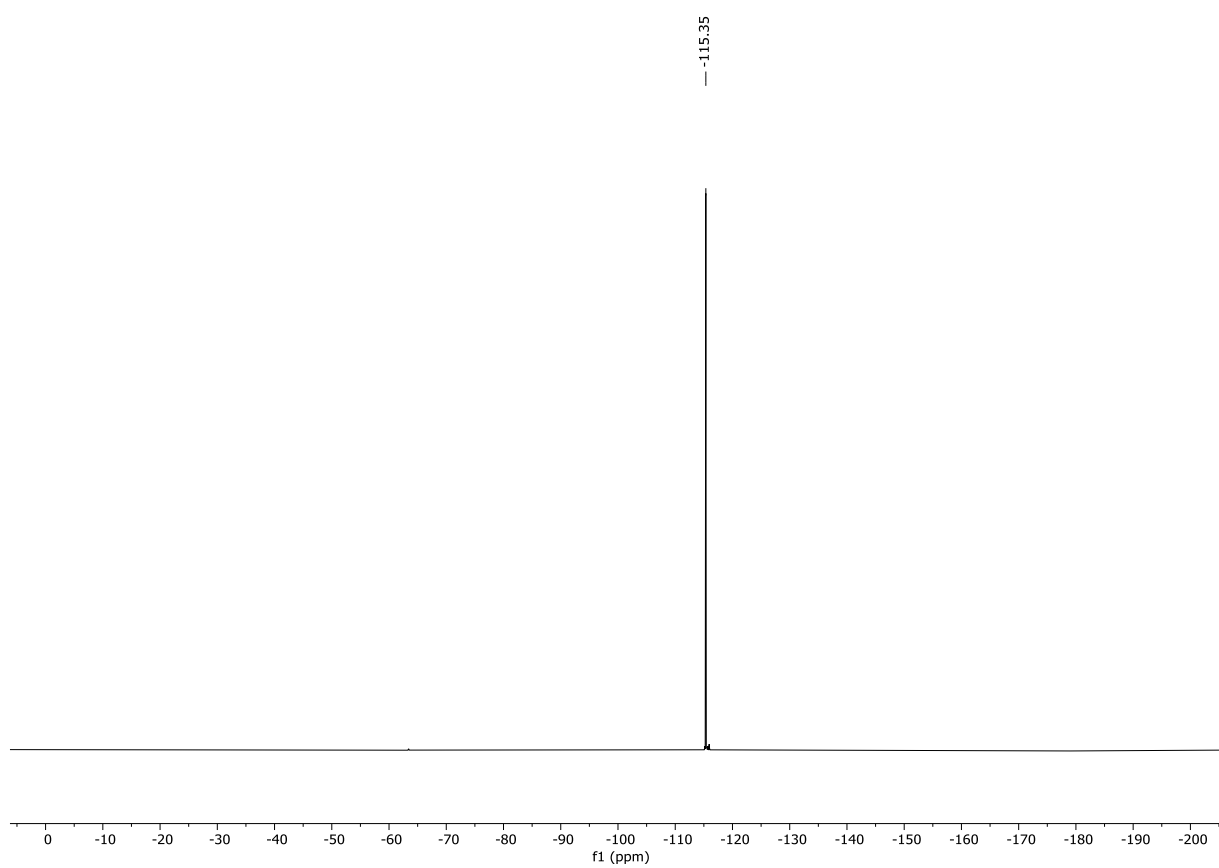

**Figure S44.**  $^{19}\text{F}$  NMR spectrum (75 MHz, 298K,  $\text{CD}_3\text{CN}$ ) of **4h**.

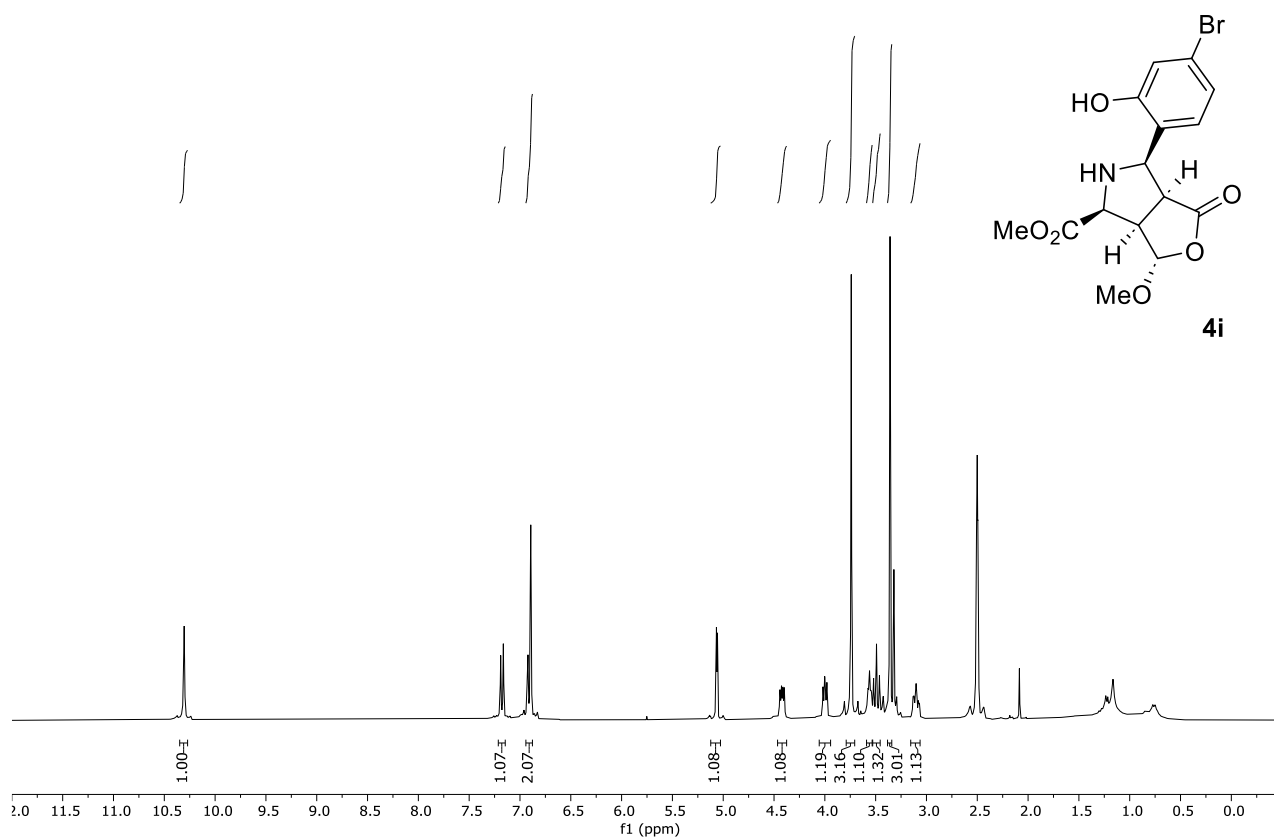

**Figure S45.** <sup>1</sup>H NMR spectrum (300 MHz, 298K, (CD<sub>3</sub>)<sub>2</sub>SO) of **4i**.

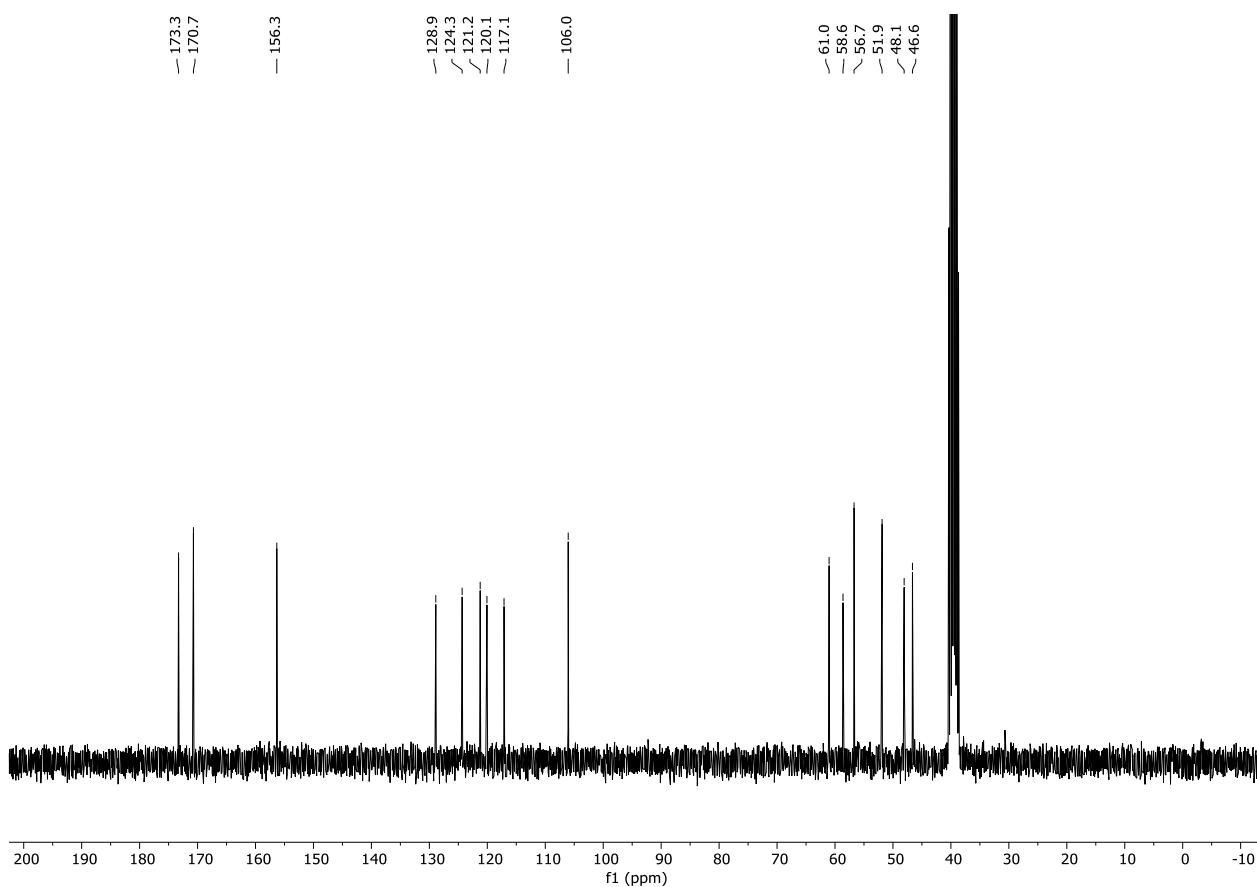

**Figure S46.** <sup>13</sup>C NMR spectrum (75 MHz, 298K, (CD<sub>3</sub>)<sub>2</sub>SO) of **4i**.

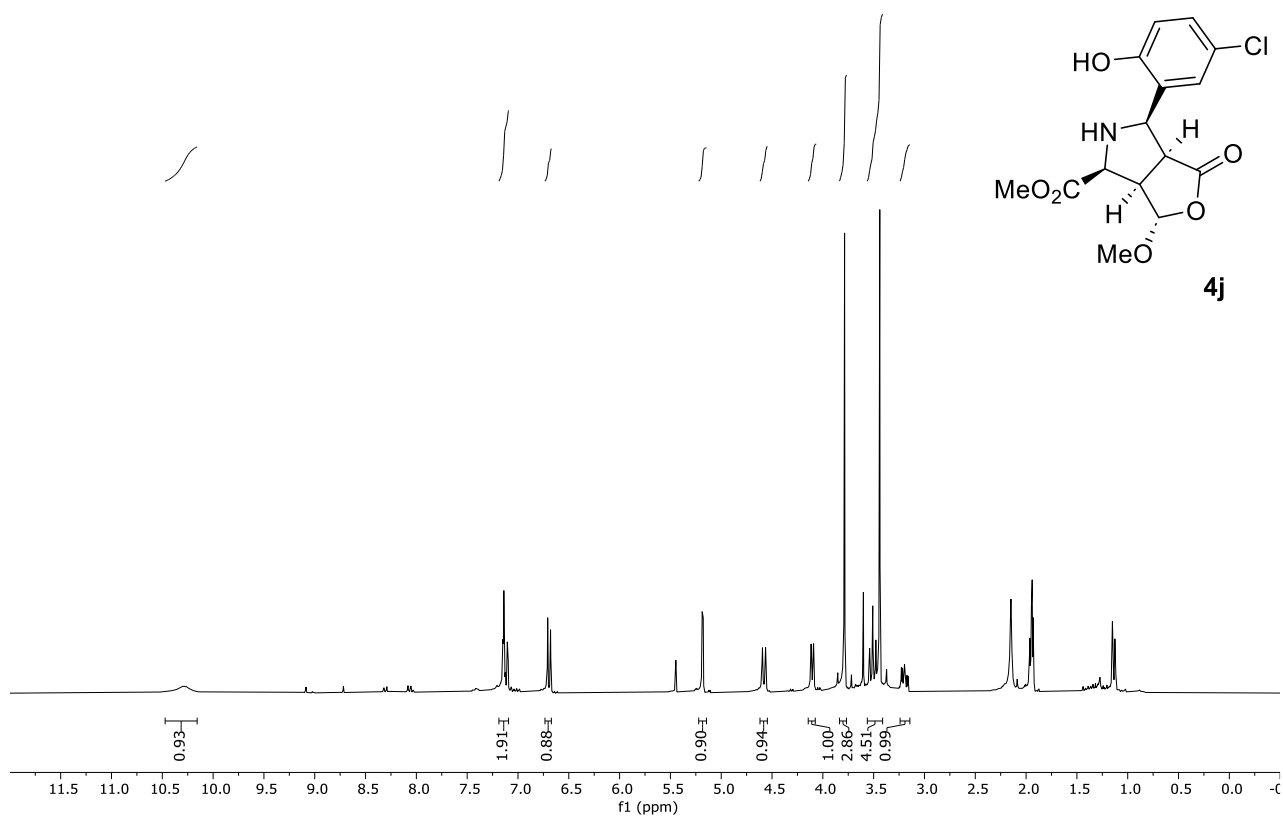

Figure S47. <sup>1</sup>H NMR spectrum (300 MHz, 298K, CD<sub>3</sub>CN) of **4j**.

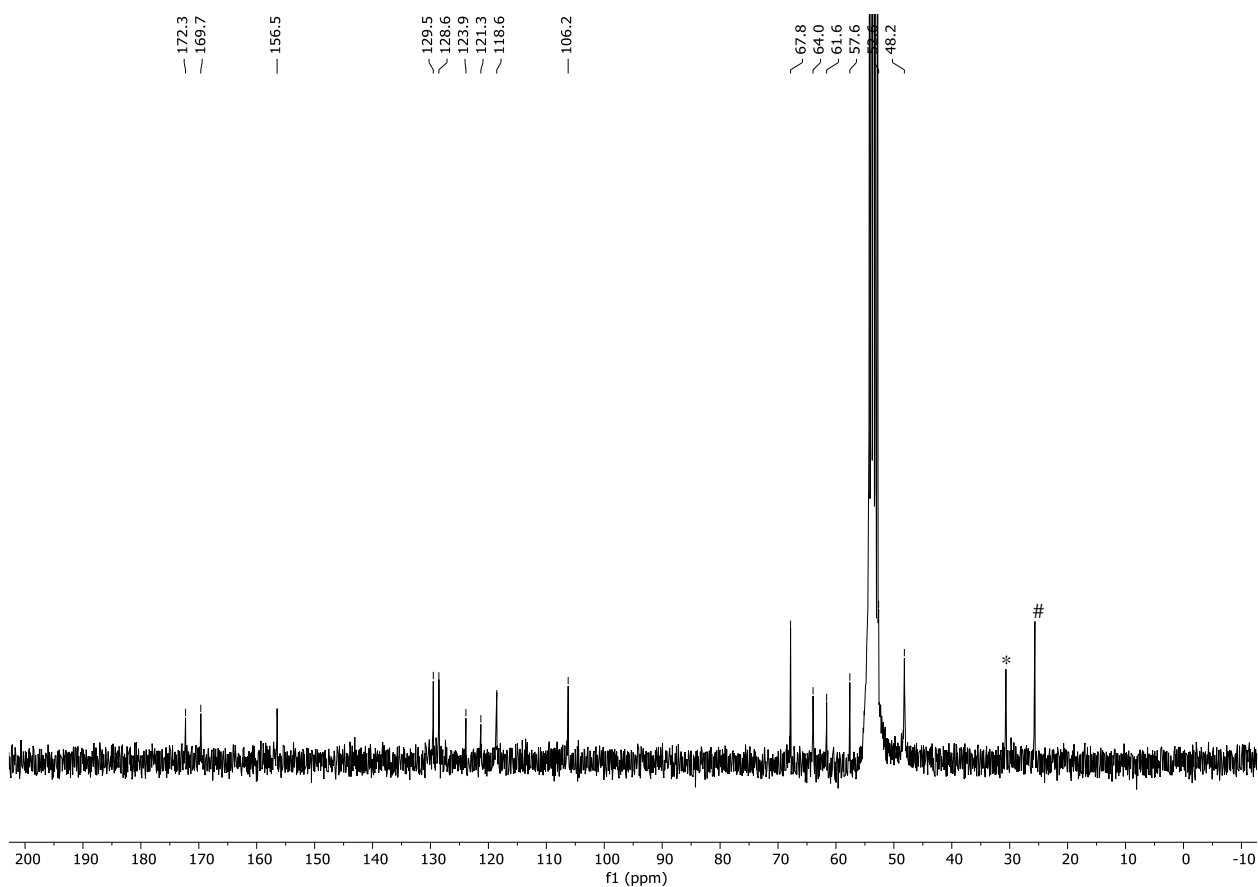

Figure S48. <sup>13</sup>C NMR spectrum (75 MHz, 298K, CD<sub>2</sub>Cl<sub>2</sub>) of **4j** (\*grease and #cyclohexane peaks).

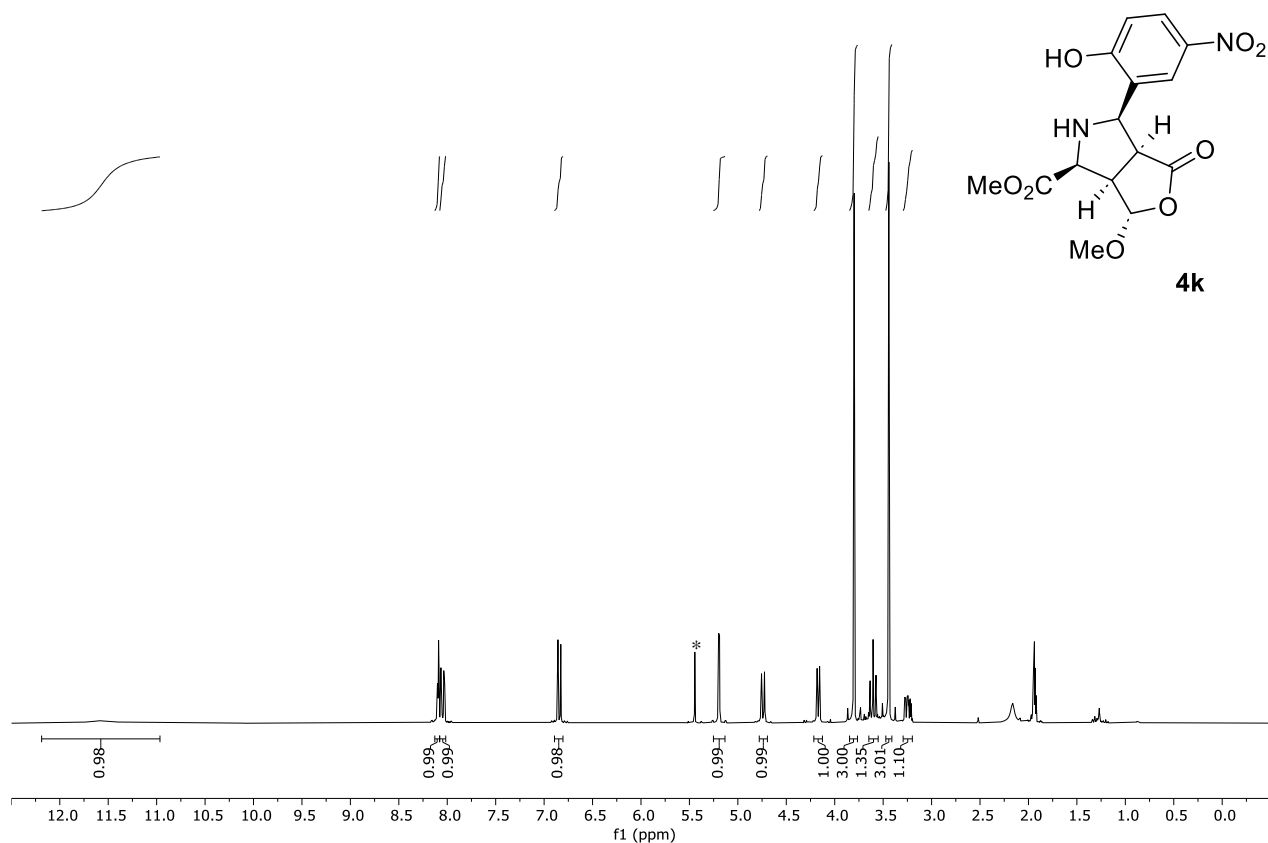

**Figure S49.** <sup>1</sup>H NMR spectrum (300 MHz, 298K, CD<sub>3</sub>CN) of **4k** (<sup>1</sup>CH<sub>2</sub>Cl<sub>2</sub> solvent peak).

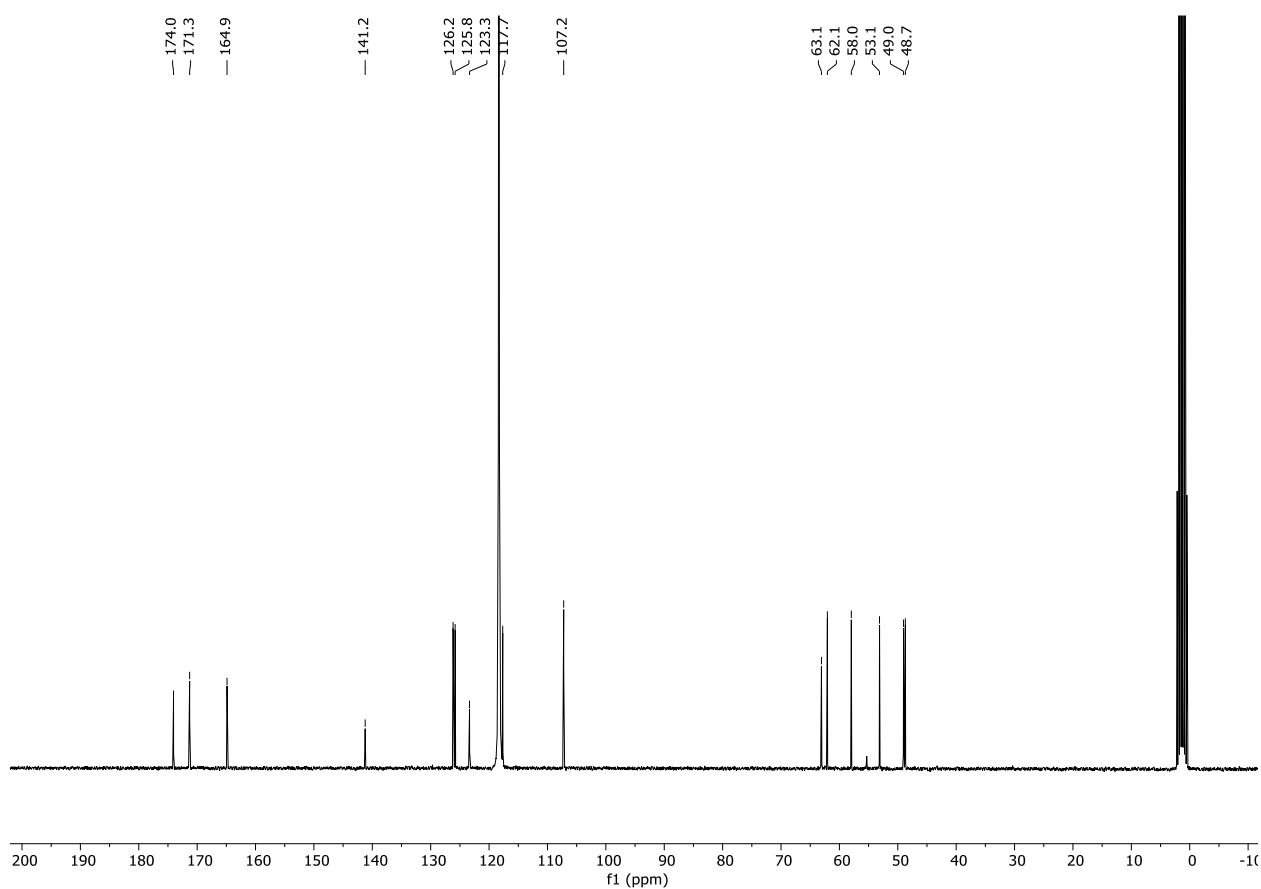

**Figure S50.** <sup>13</sup>C NMR spectrum (75 MHz, 298K, CD<sub>3</sub>CN) of **4k**.

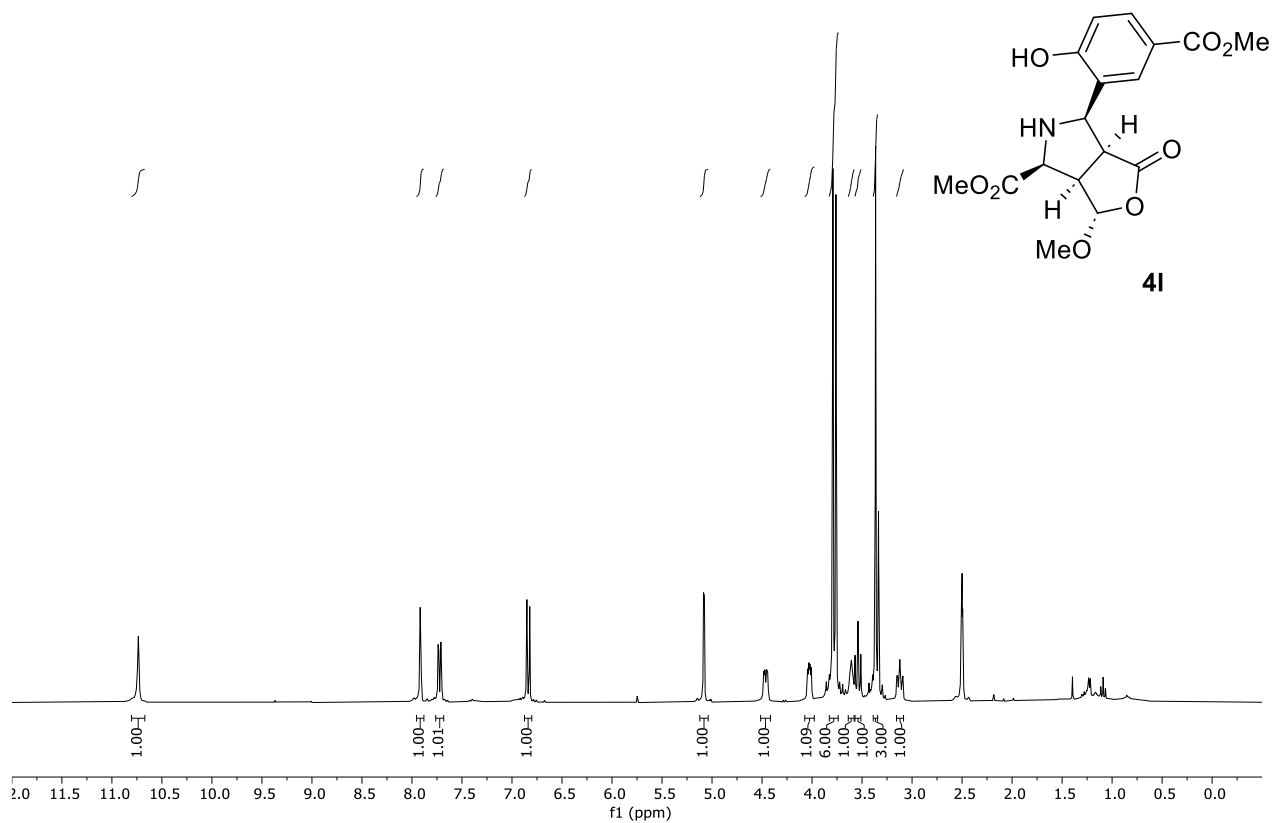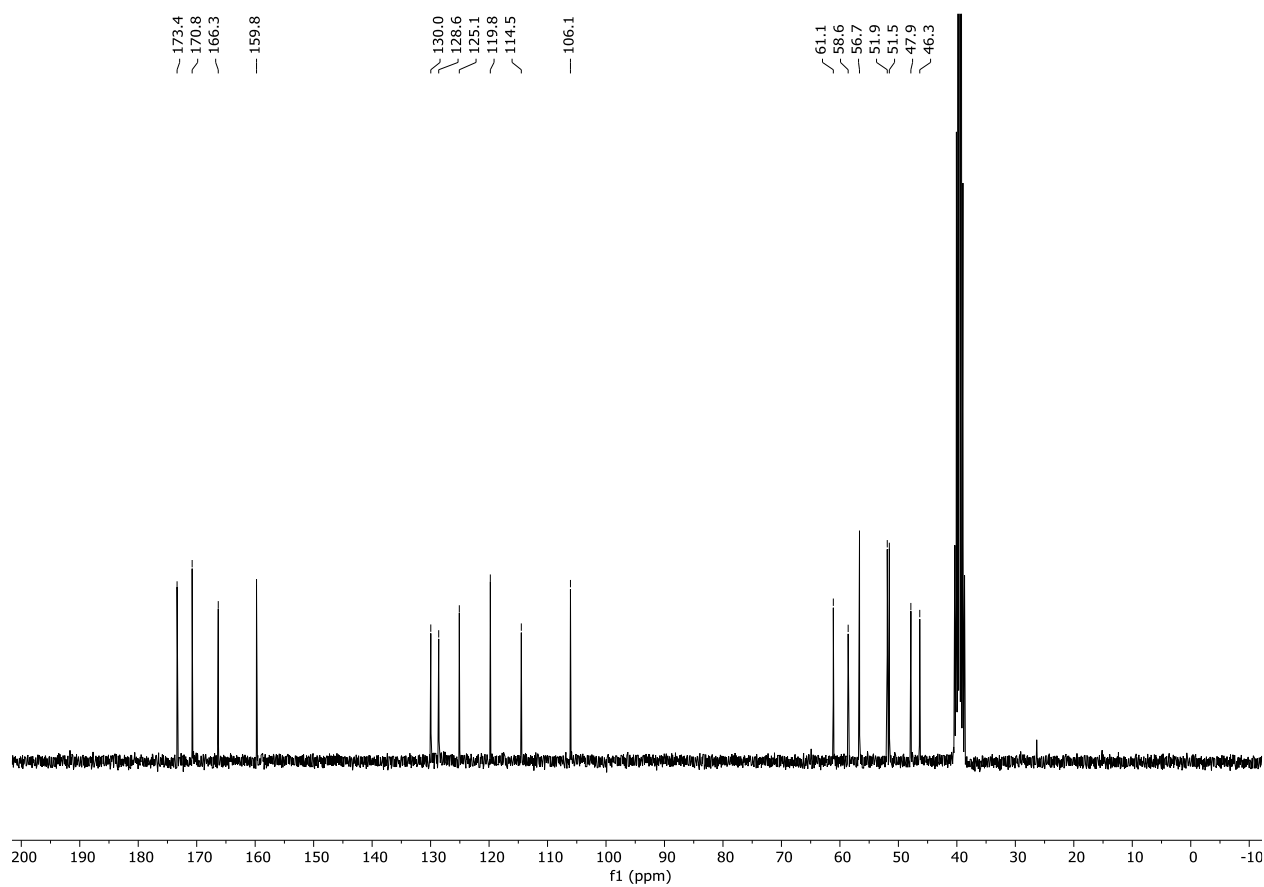

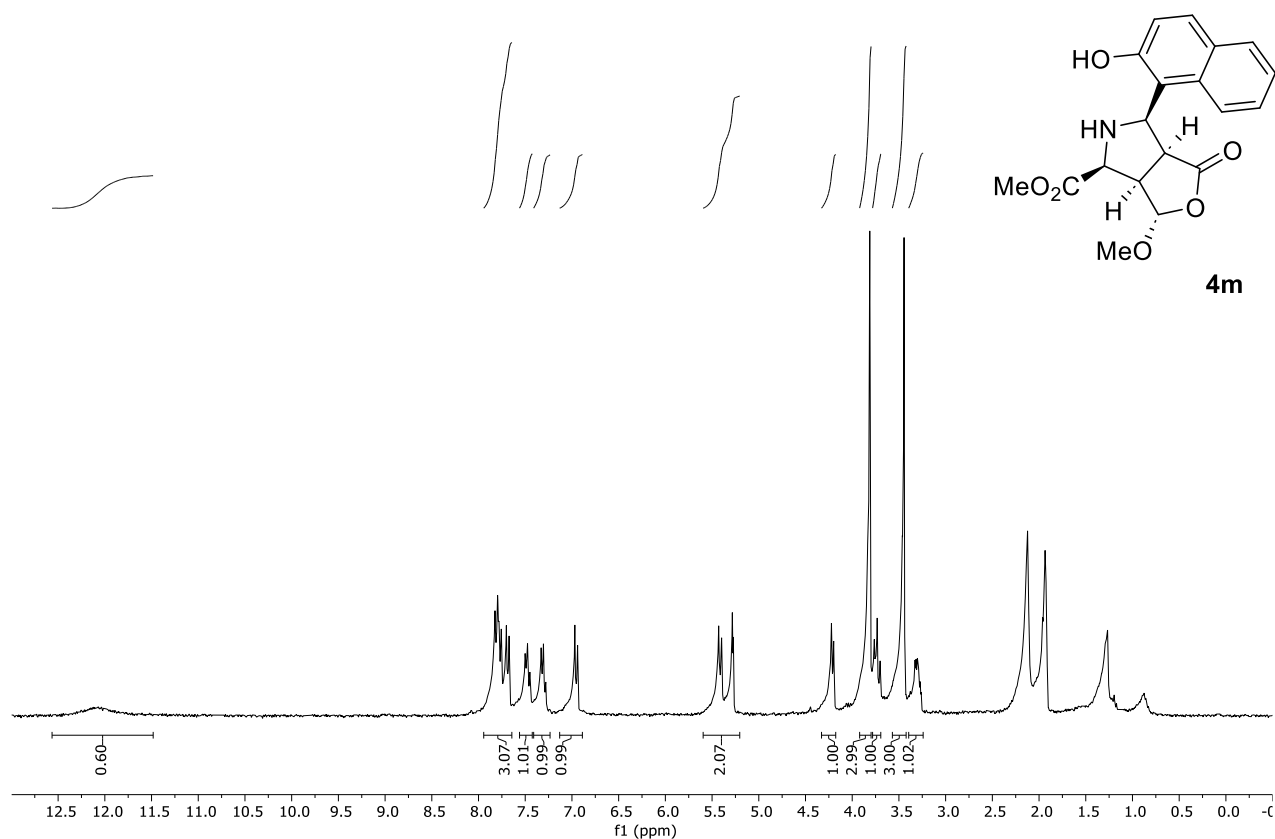

**Figure S53.** <sup>1</sup>H NMR spectrum (300 MHz, 298K, CD<sub>3</sub>CN) of **4m**.

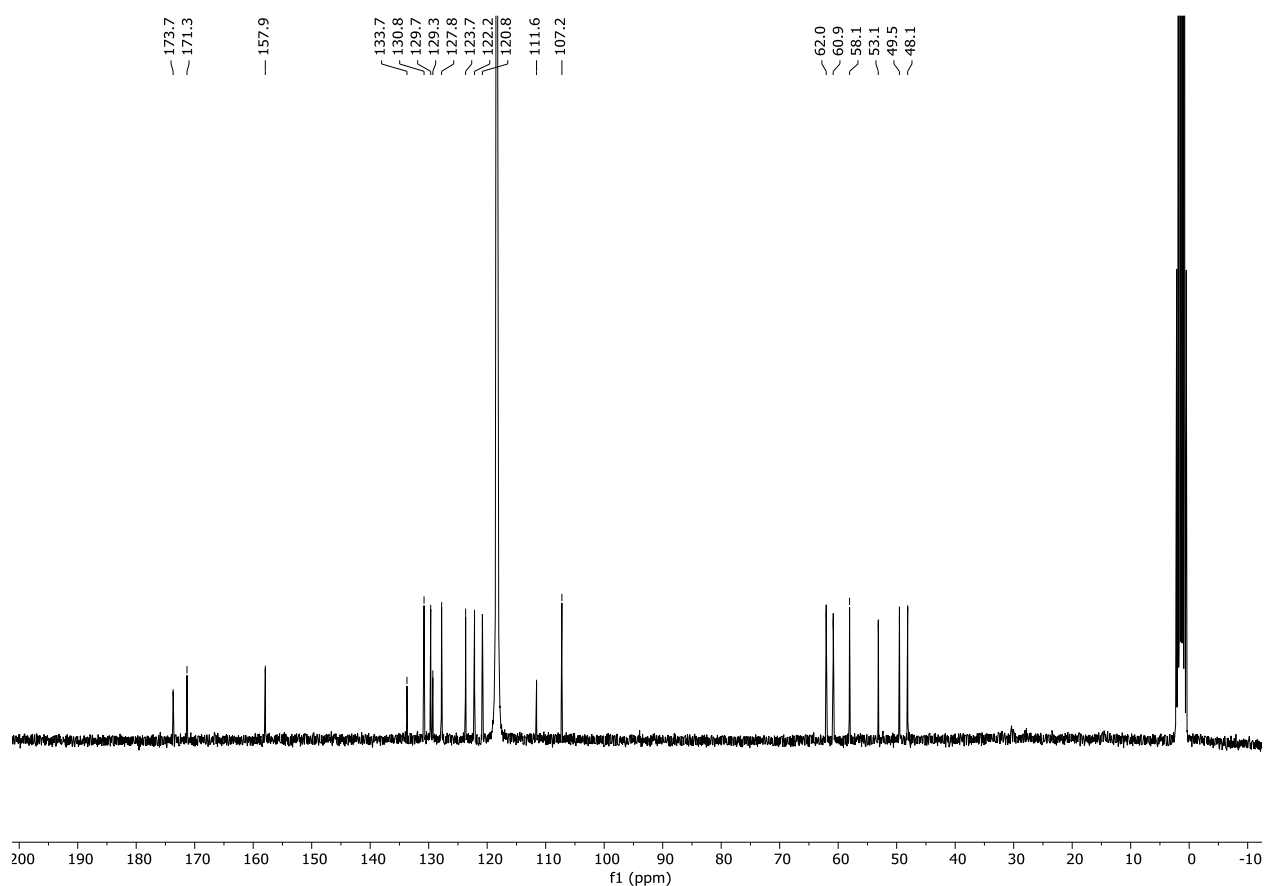

**Figure S54.** <sup>13</sup>C NMR spectrum (75 MHz, 298K, CD<sub>3</sub>CN) of **4m**.

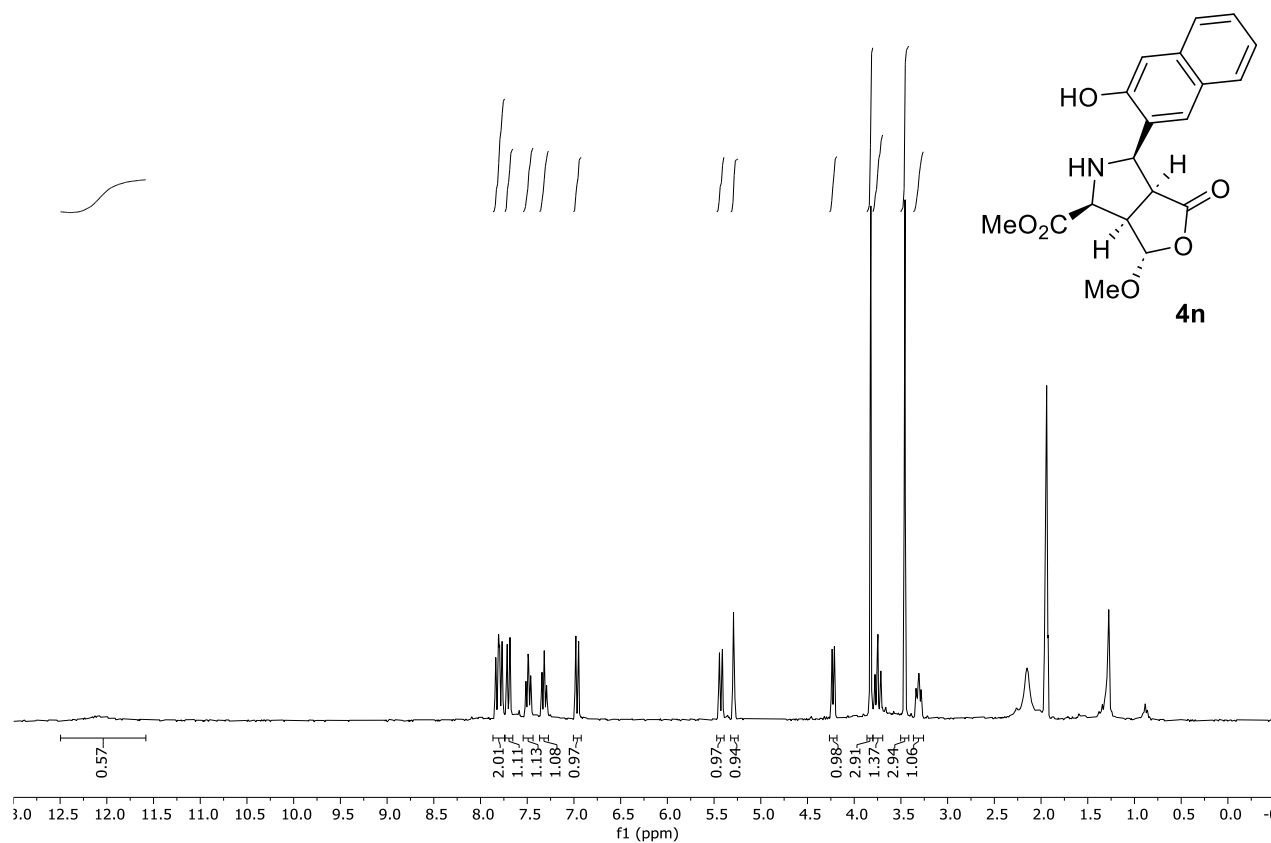

Figure S55. <sup>1</sup>H NMR spectrum (300 MHz, 298K, CD<sub>3</sub>CN) of **4n**.

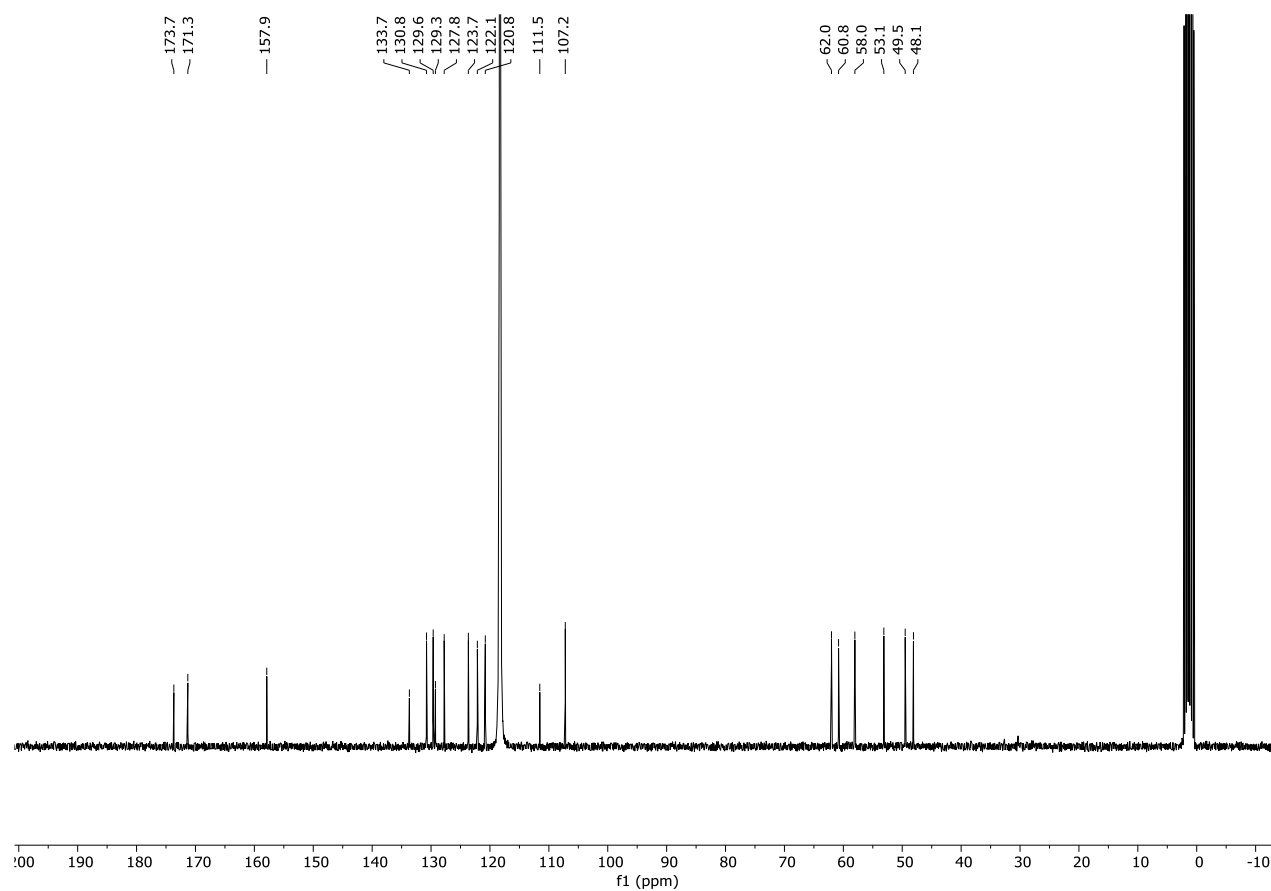

Figure S56. <sup>13</sup>C NMR spectrum (75 MHz, 298K, CD<sub>3</sub>CN) of **4n**.

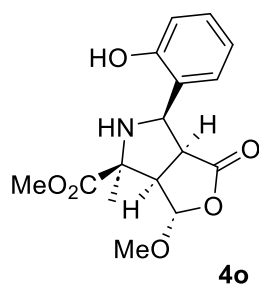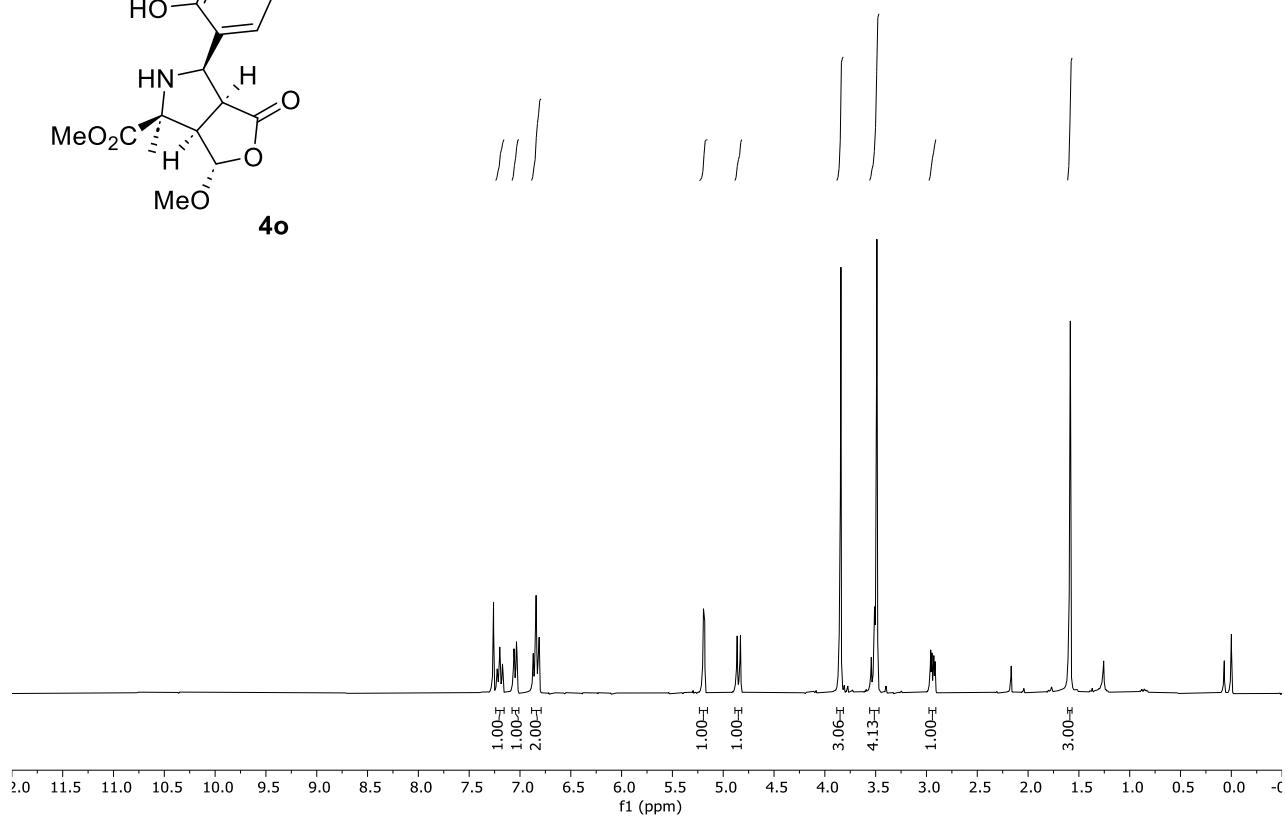

Figure S57. <sup>1</sup>H NMR spectrum (300 MHz, 298K, CDCl<sub>3</sub>) of **4o**.

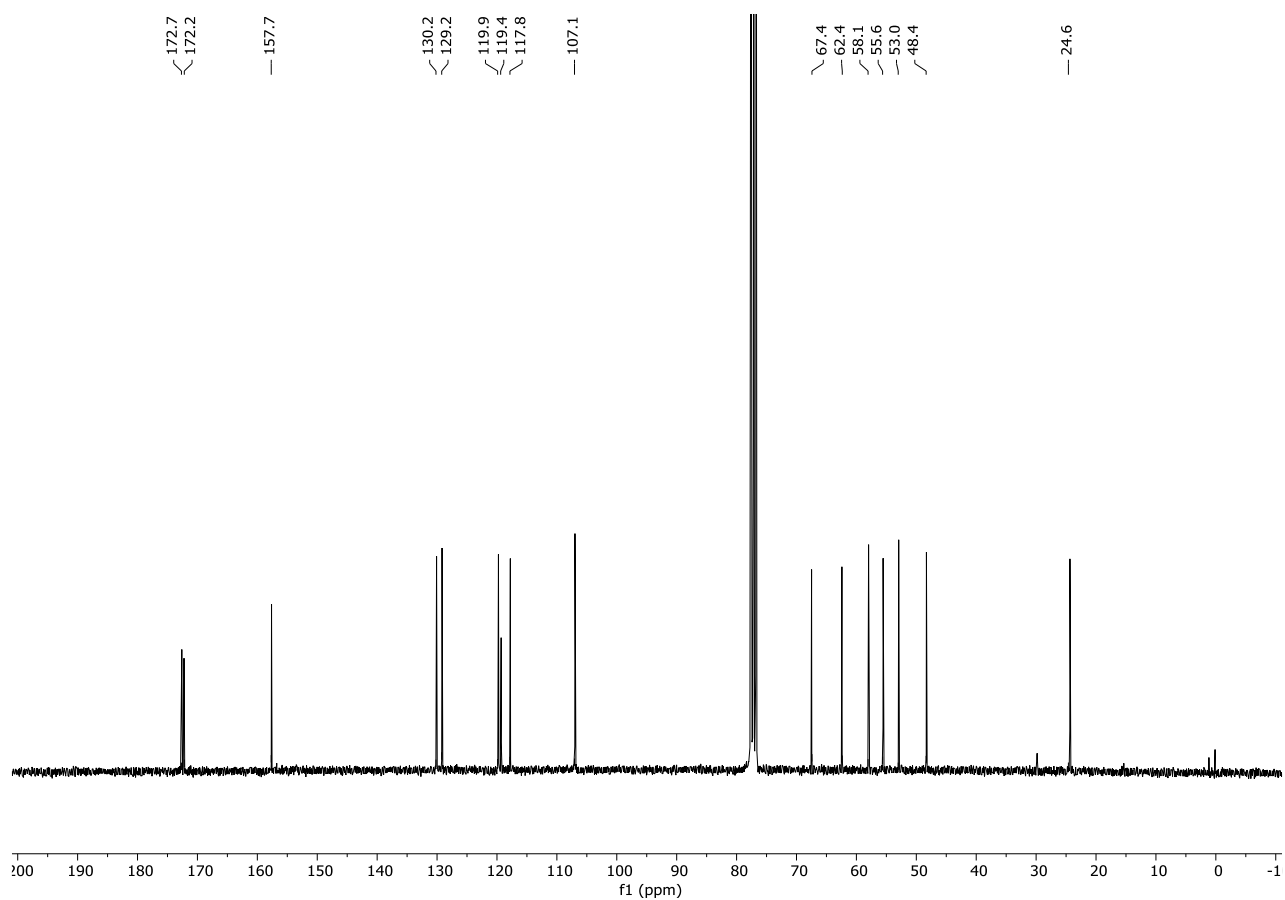

Figure S58. <sup>13</sup>C NMR spectrum (75 MHz, 298K, CDCl<sub>3</sub>) of **4o**.

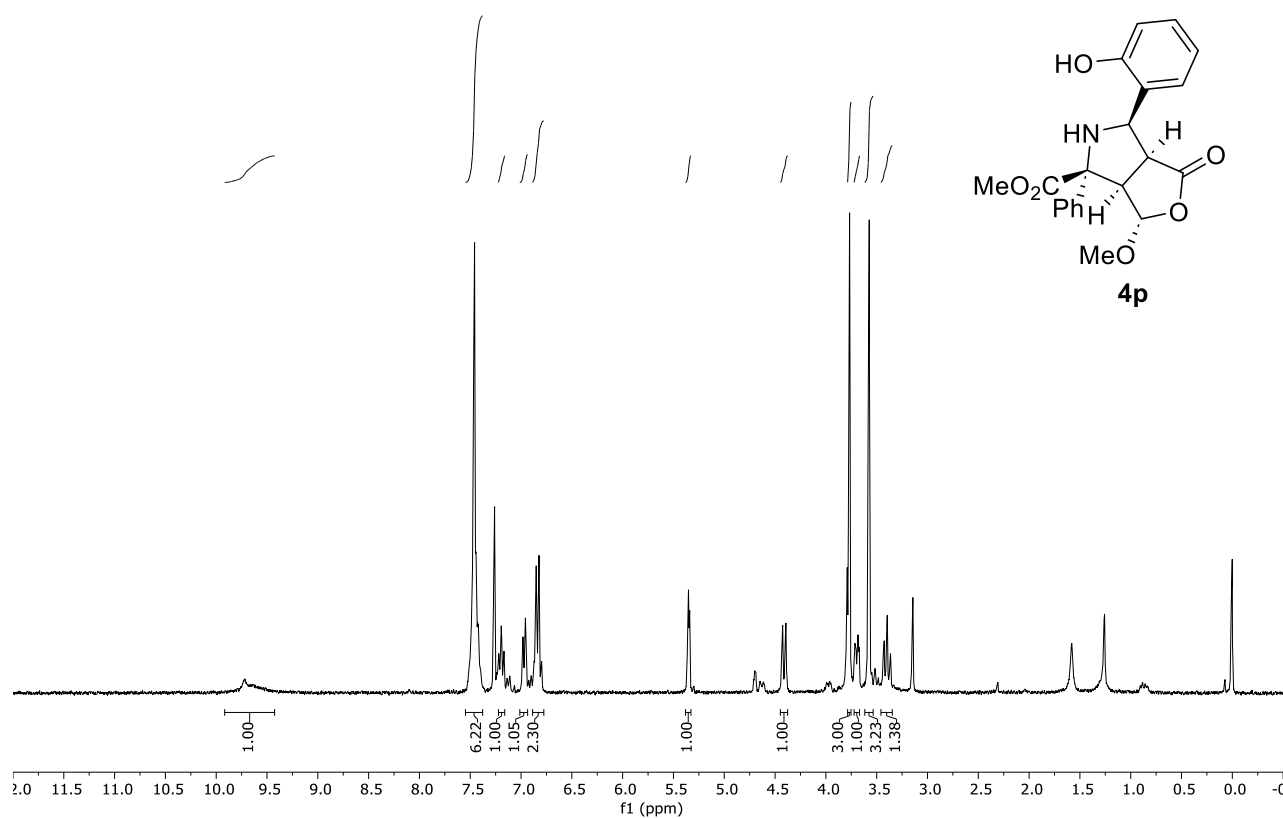

**Figure S59.**  $^1\text{H}$  NMR spectrum (300 MHz, 298K,  $\text{CDCl}_3$ ) of **4p**. (d.r. = 5:1)

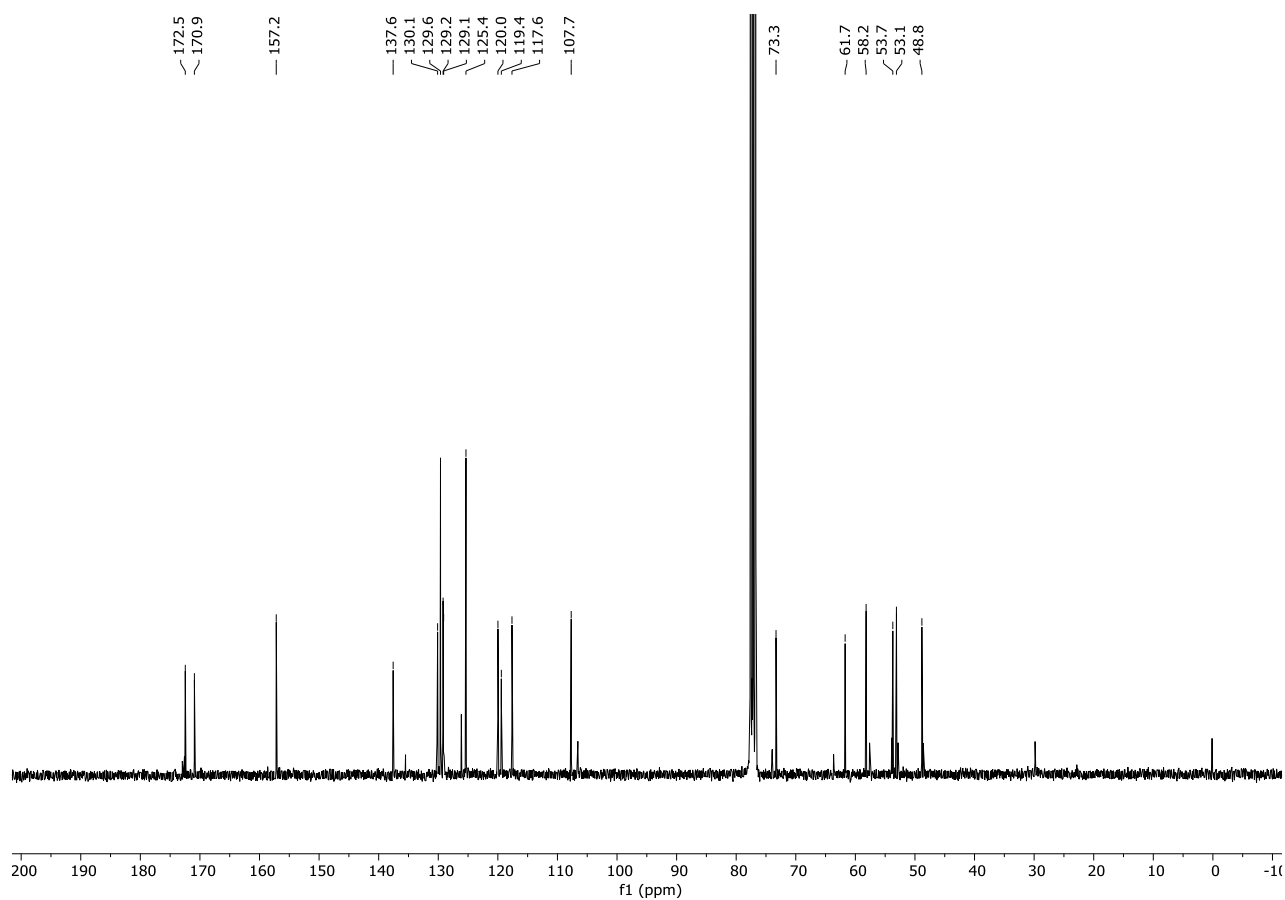

**Figure S60.**  $^{13}\text{C}$  NMR spectrum (75 MHz, 298K,  $\text{CDCl}_3$ ) of **4p**. (d.r. = 5:1)

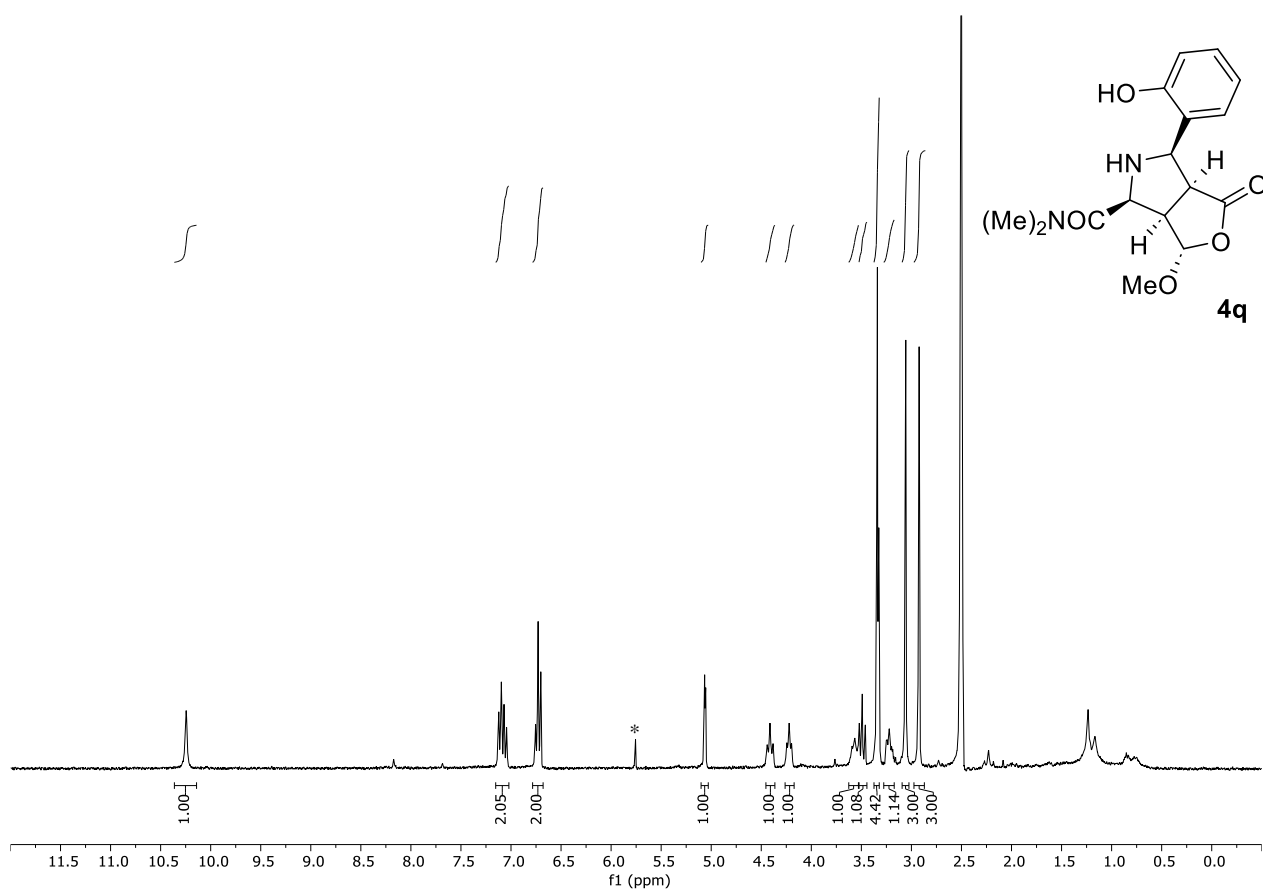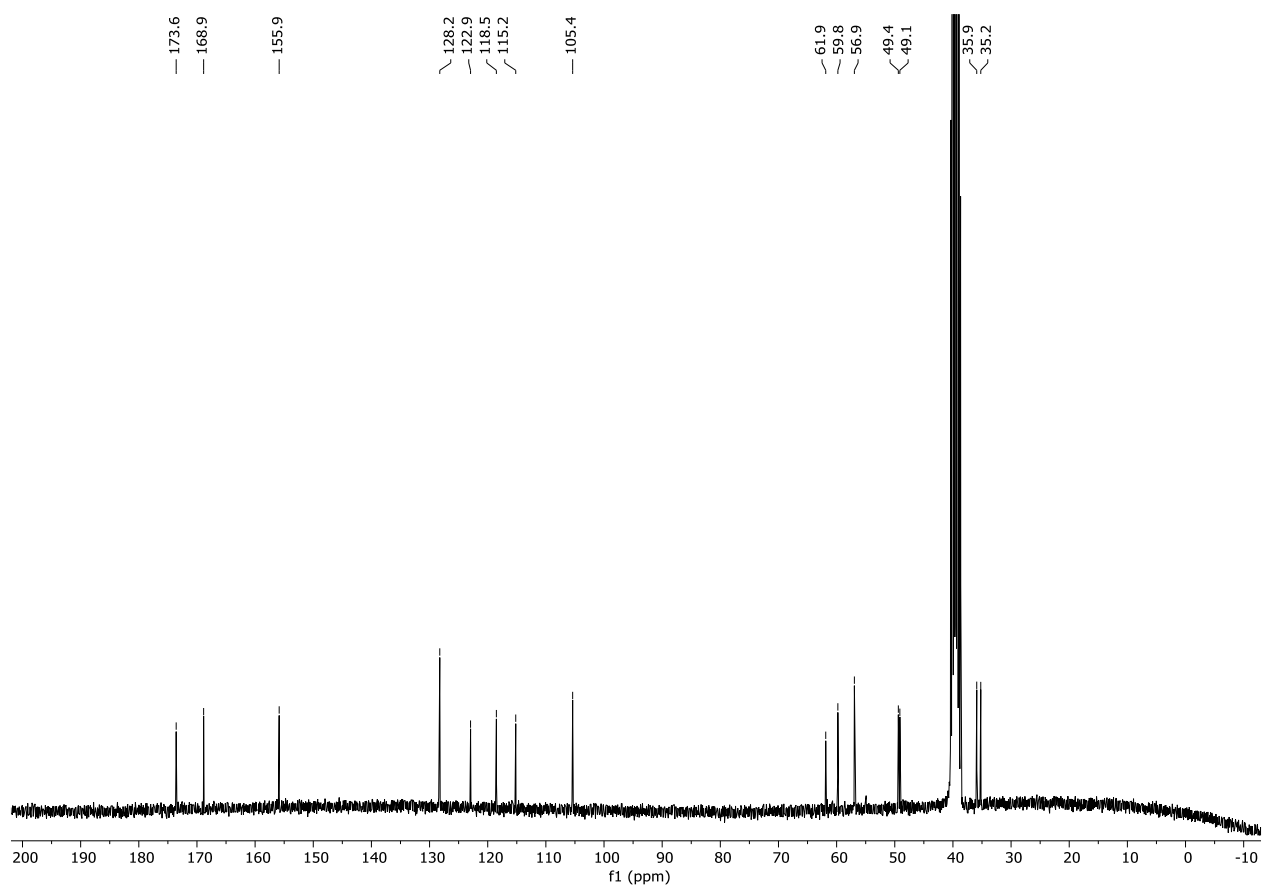

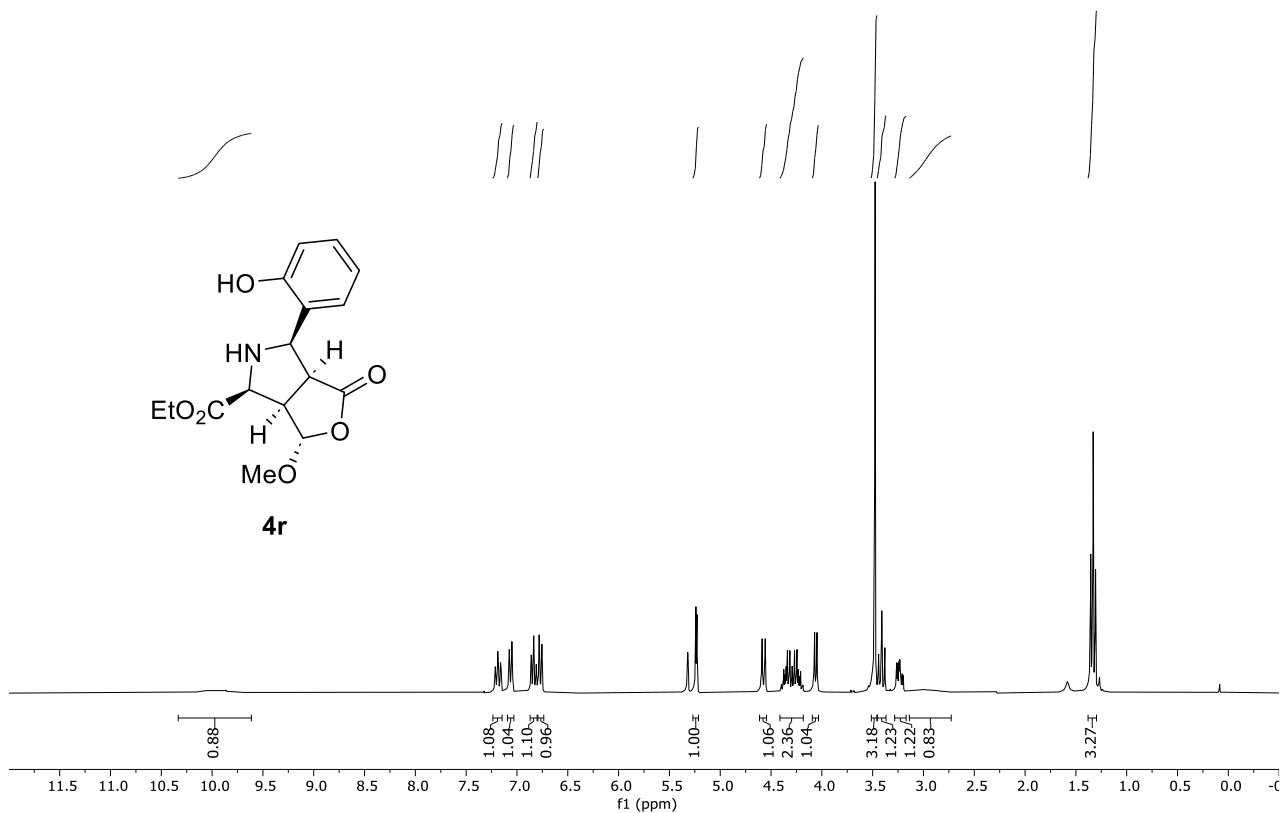

Figure S63. <sup>1</sup>H NMR spectrum (300 MHz, 298K, CD<sub>2</sub>Cl<sub>2</sub>) of **4r**.

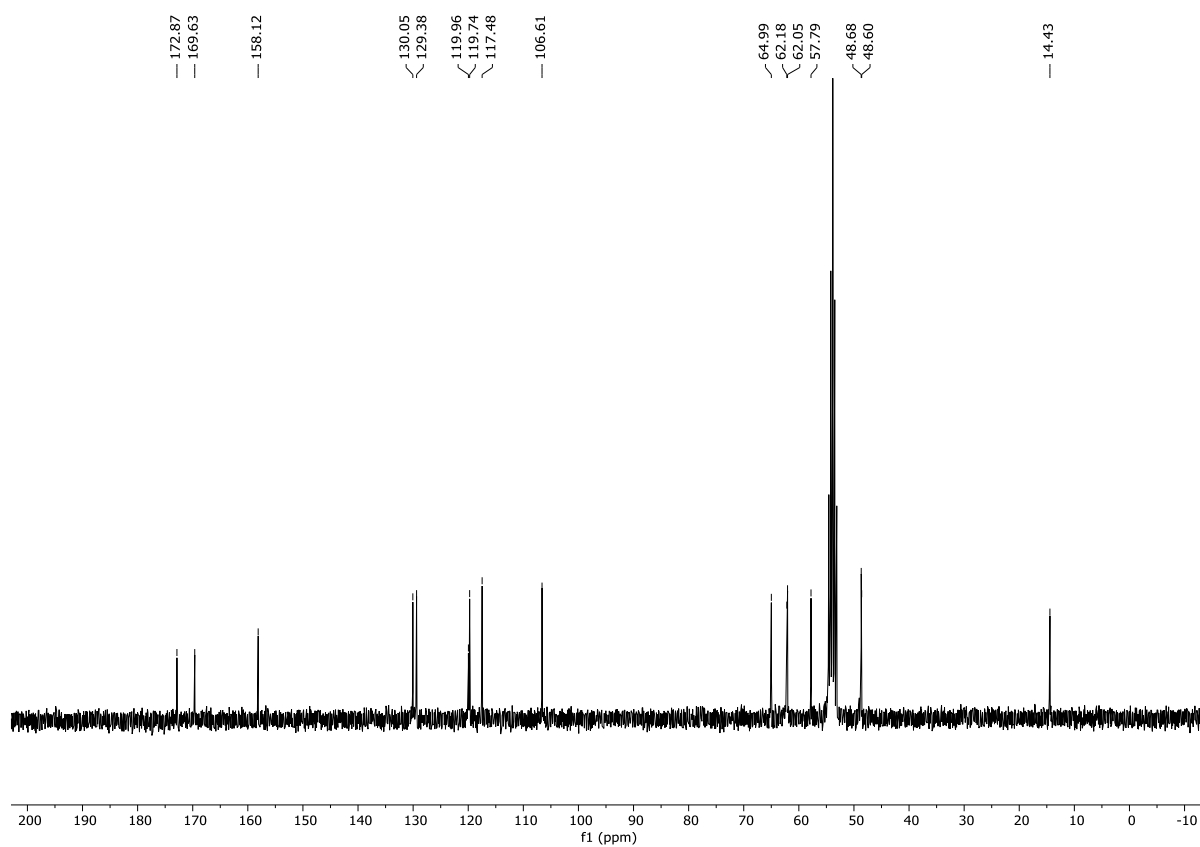

Figure S64. <sup>13</sup>C NMR spectrum (75 MHz, 298K, CD<sub>2</sub>Cl<sub>2</sub>) of **4r**.

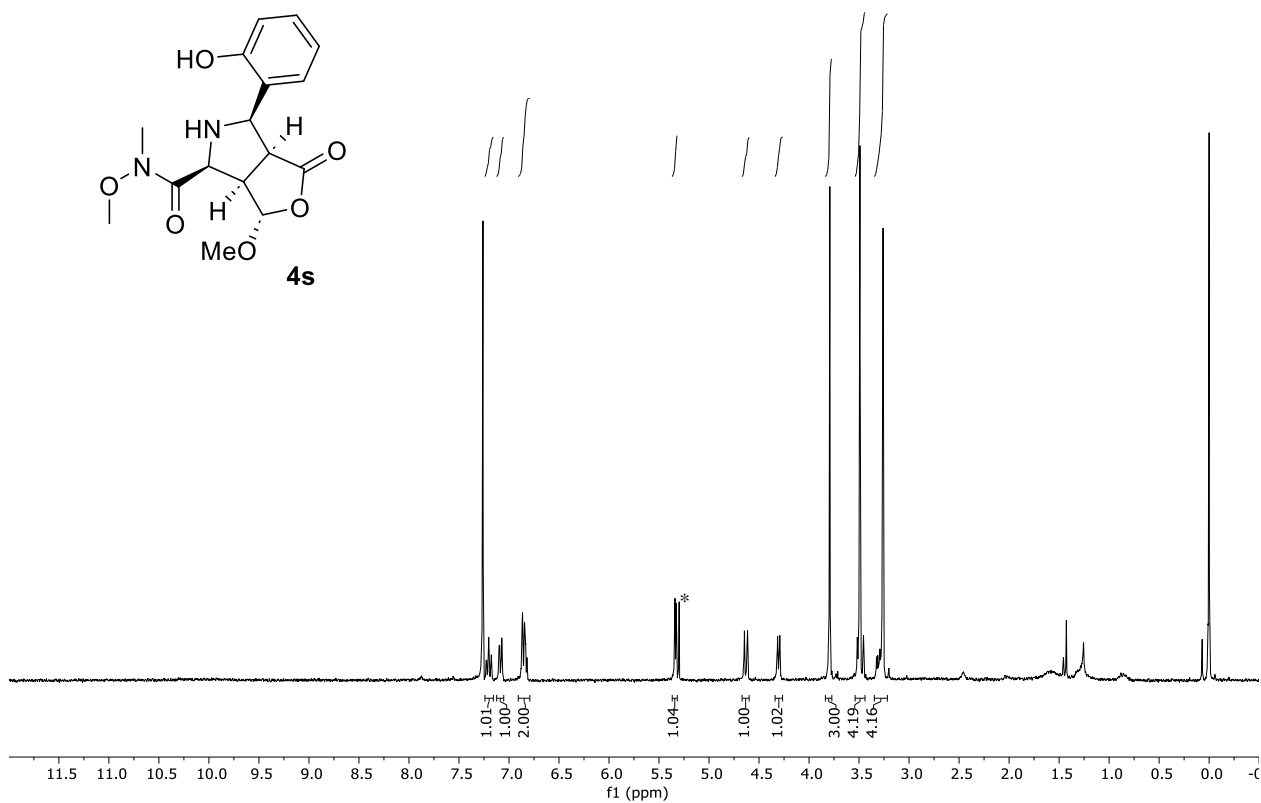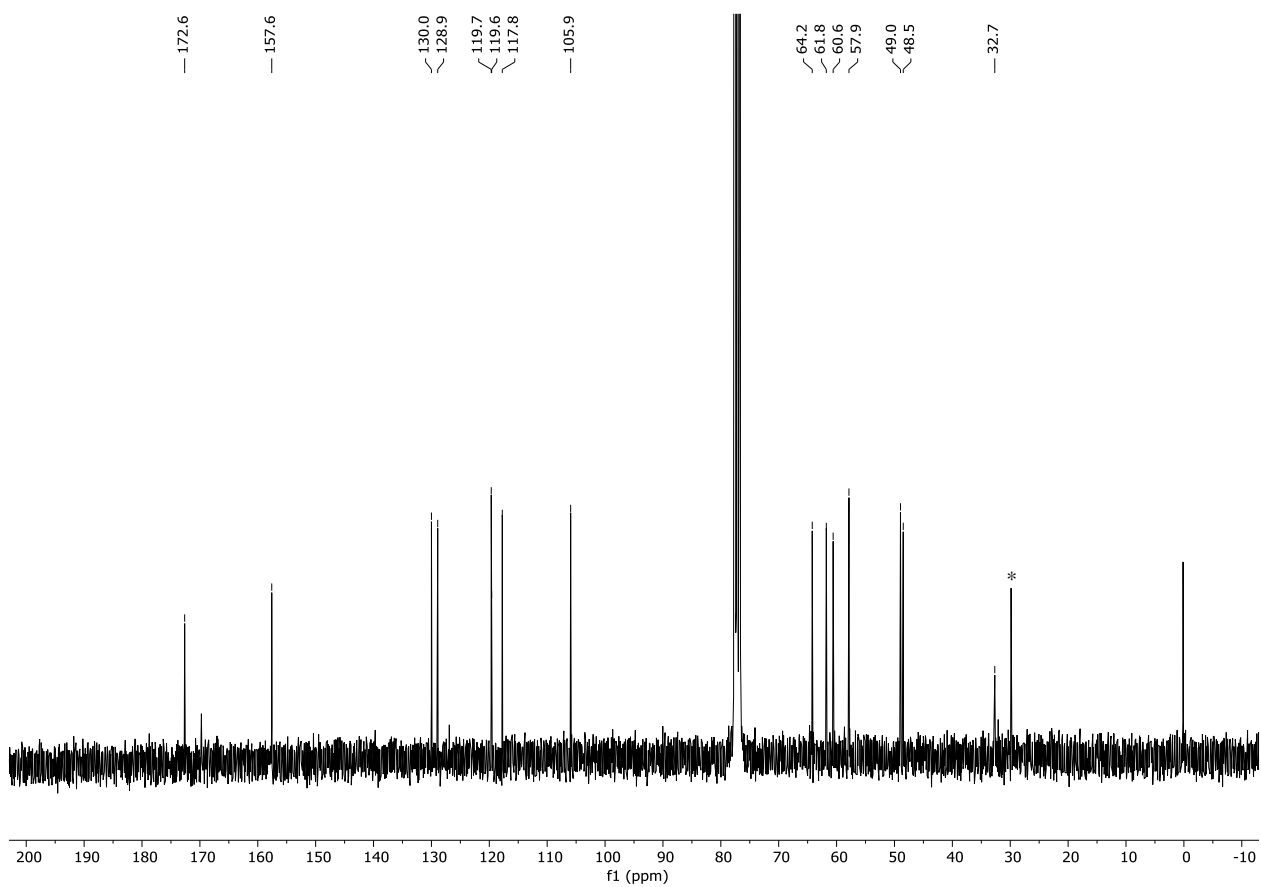

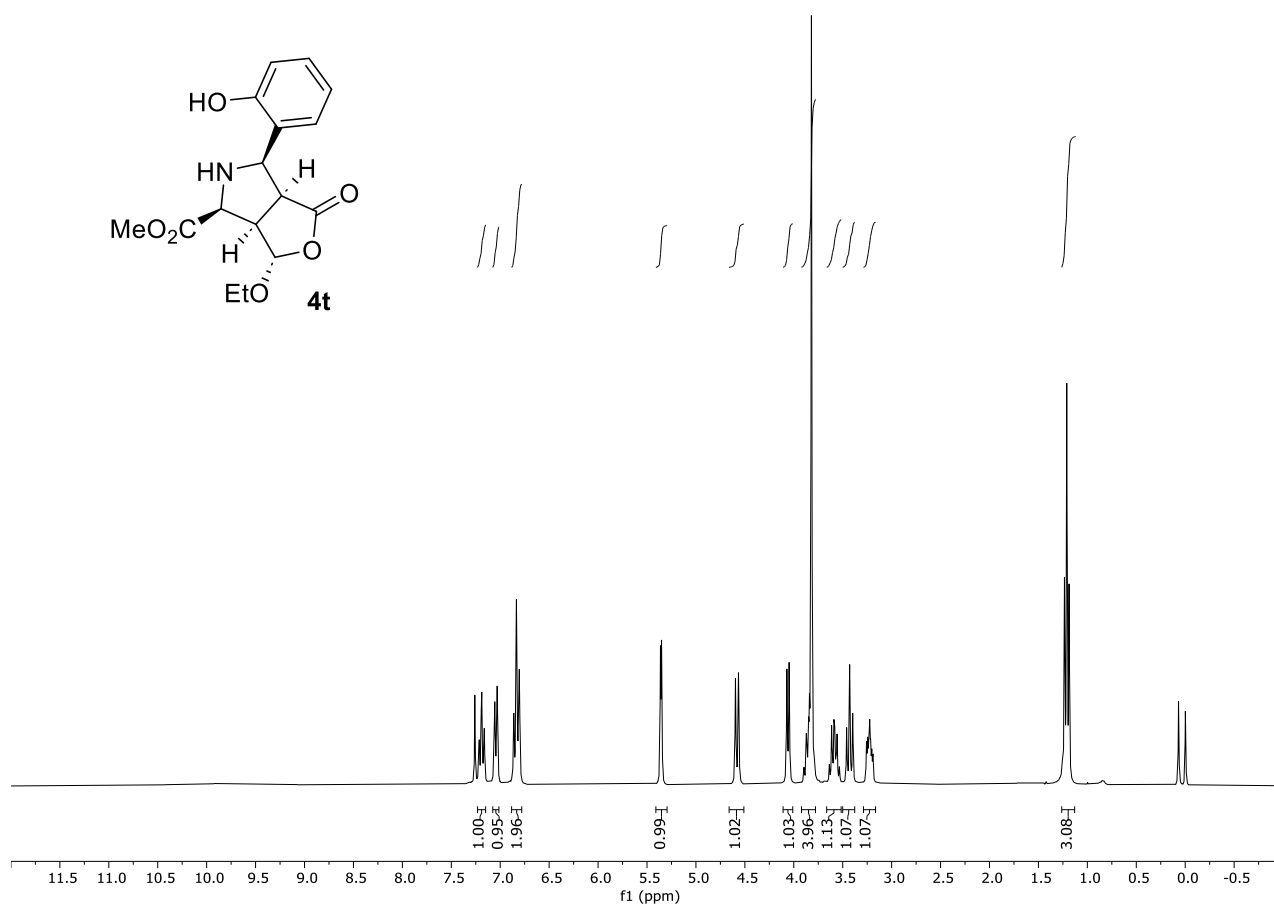

Figure S67. <sup>1</sup>H NMR spectrum (300 MHz, 298K, CDCl<sub>3</sub>) of **4t**.

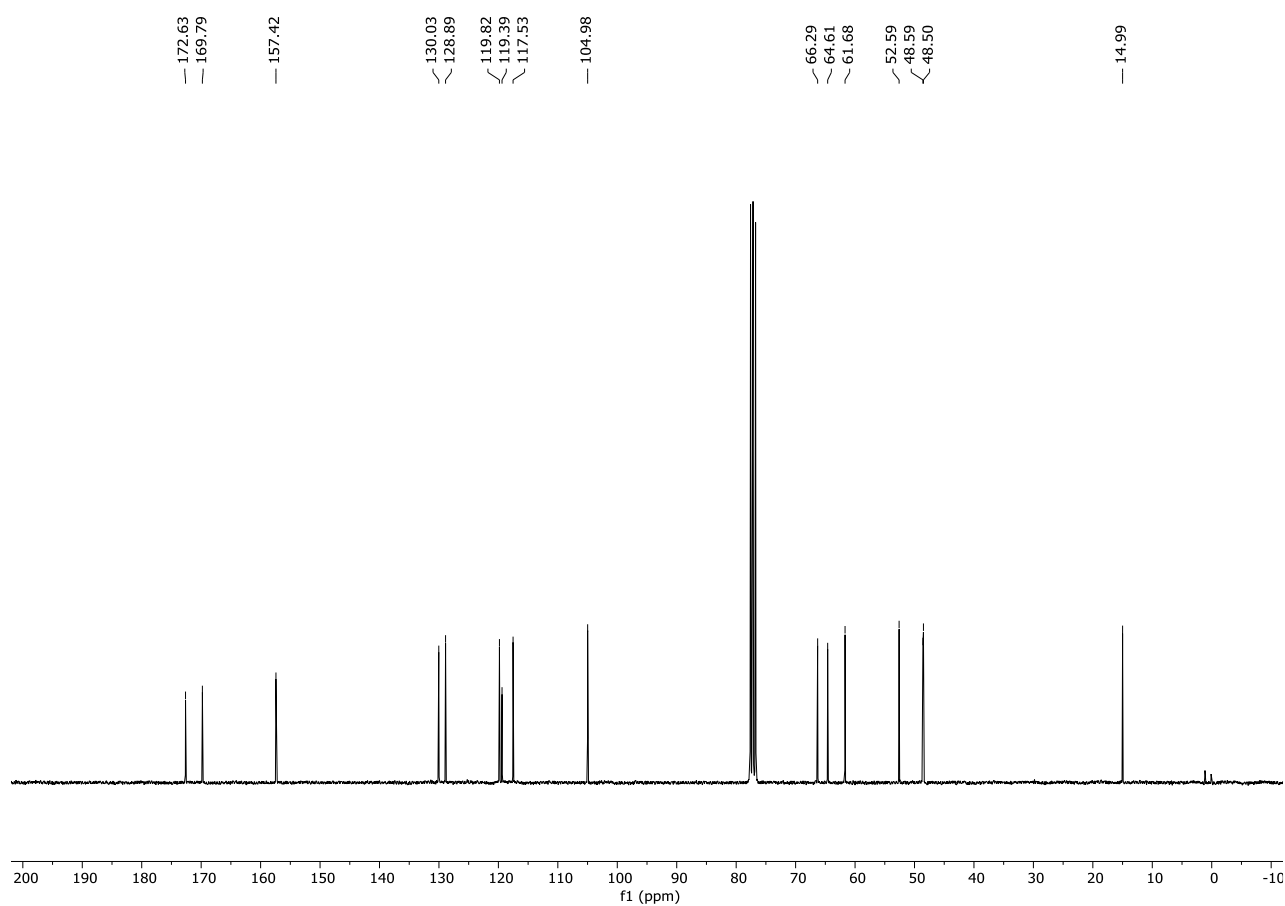

Figure S68. <sup>13</sup>C NMR spectrum (75 MHz, 298K, CDCl<sub>3</sub>) of **4t**.

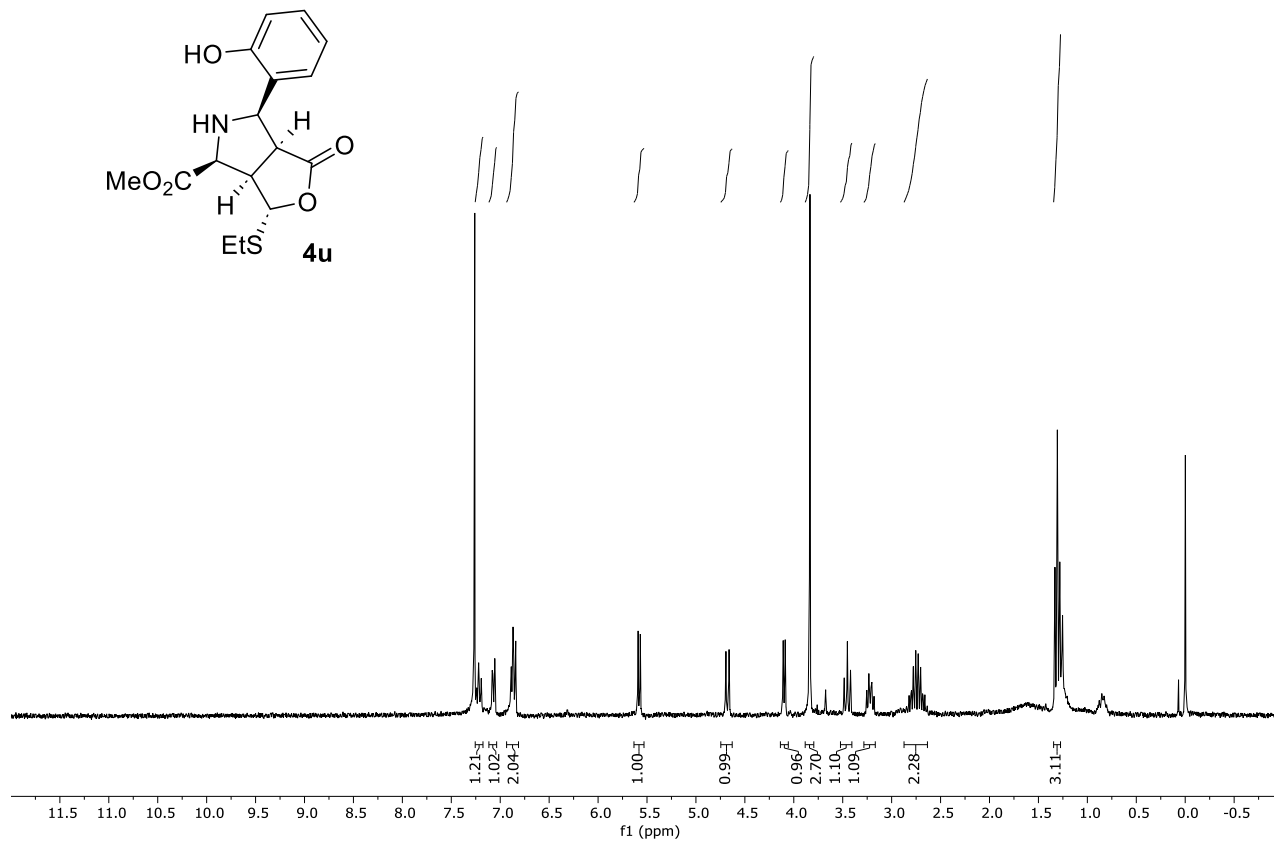

Figure S69. <sup>1</sup>H NMR spectrum (300 MHz, 298K, CDCl<sub>3</sub>) of **4u**.

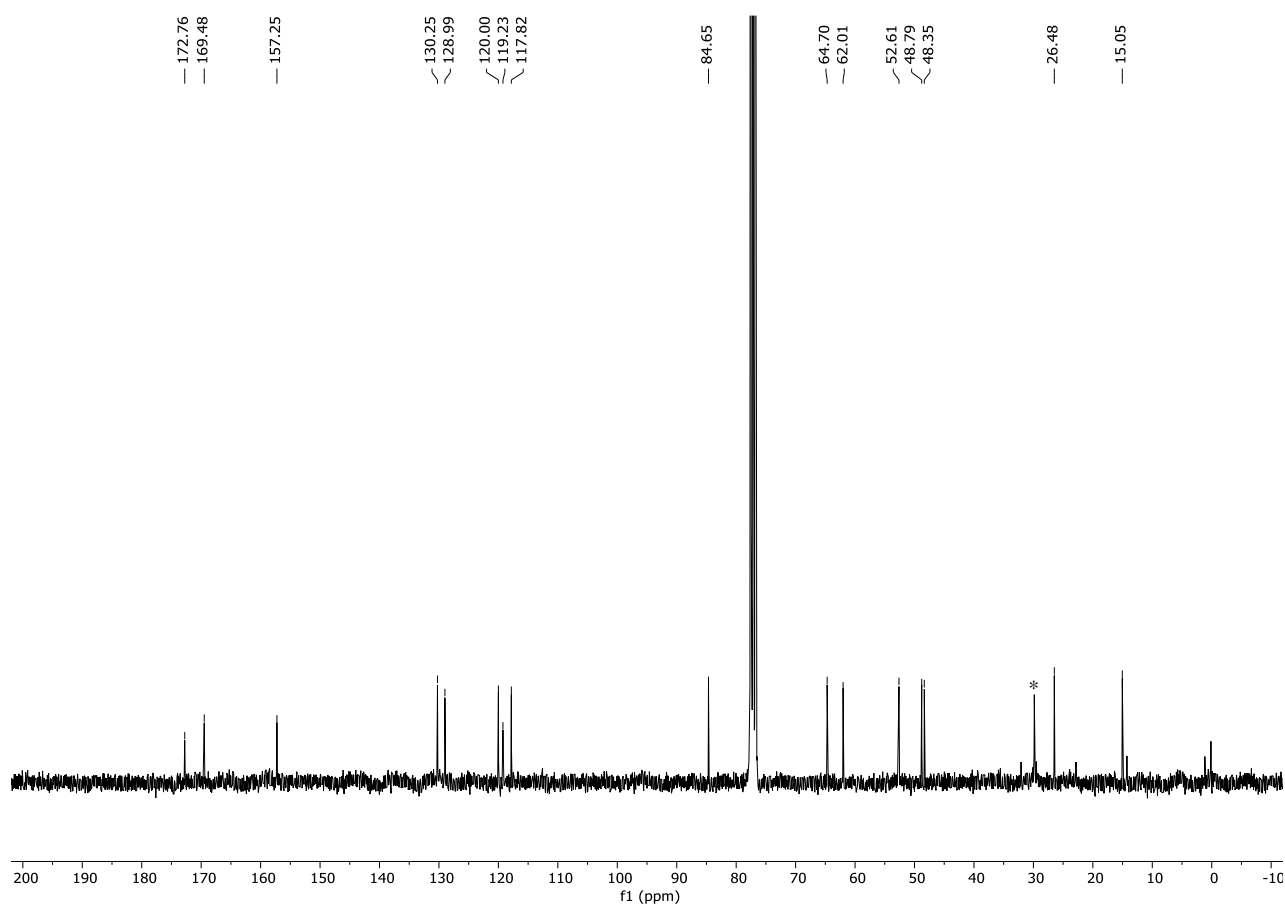

Figure S70. <sup>13</sup>C NMR spectrum (75 MHz, 298K, CDCl<sub>3</sub>) of **4u** (\*grease peak).

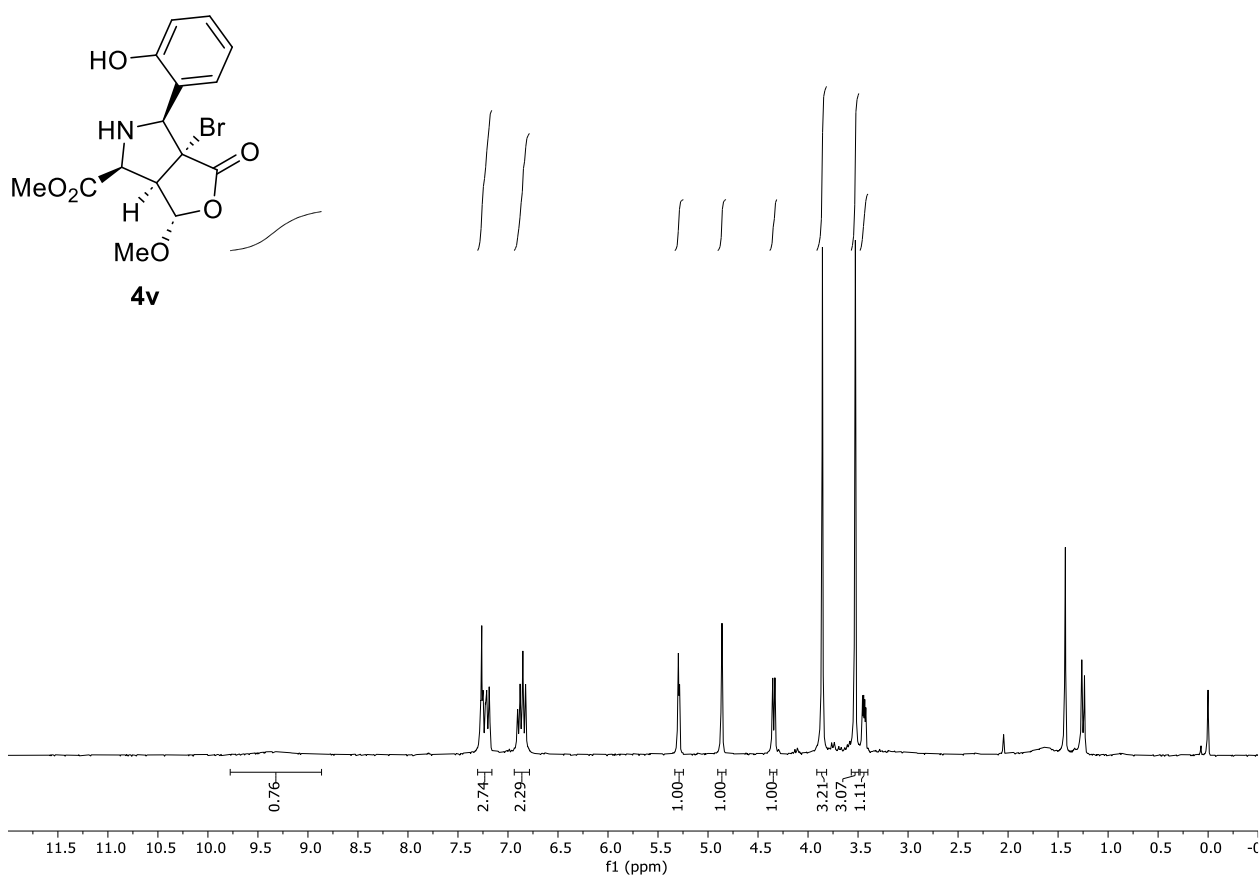

**Figure S71.** <sup>1</sup>H NMR spectrum (300 MHz, 298K, CDCl<sub>3</sub>) of **4v**.

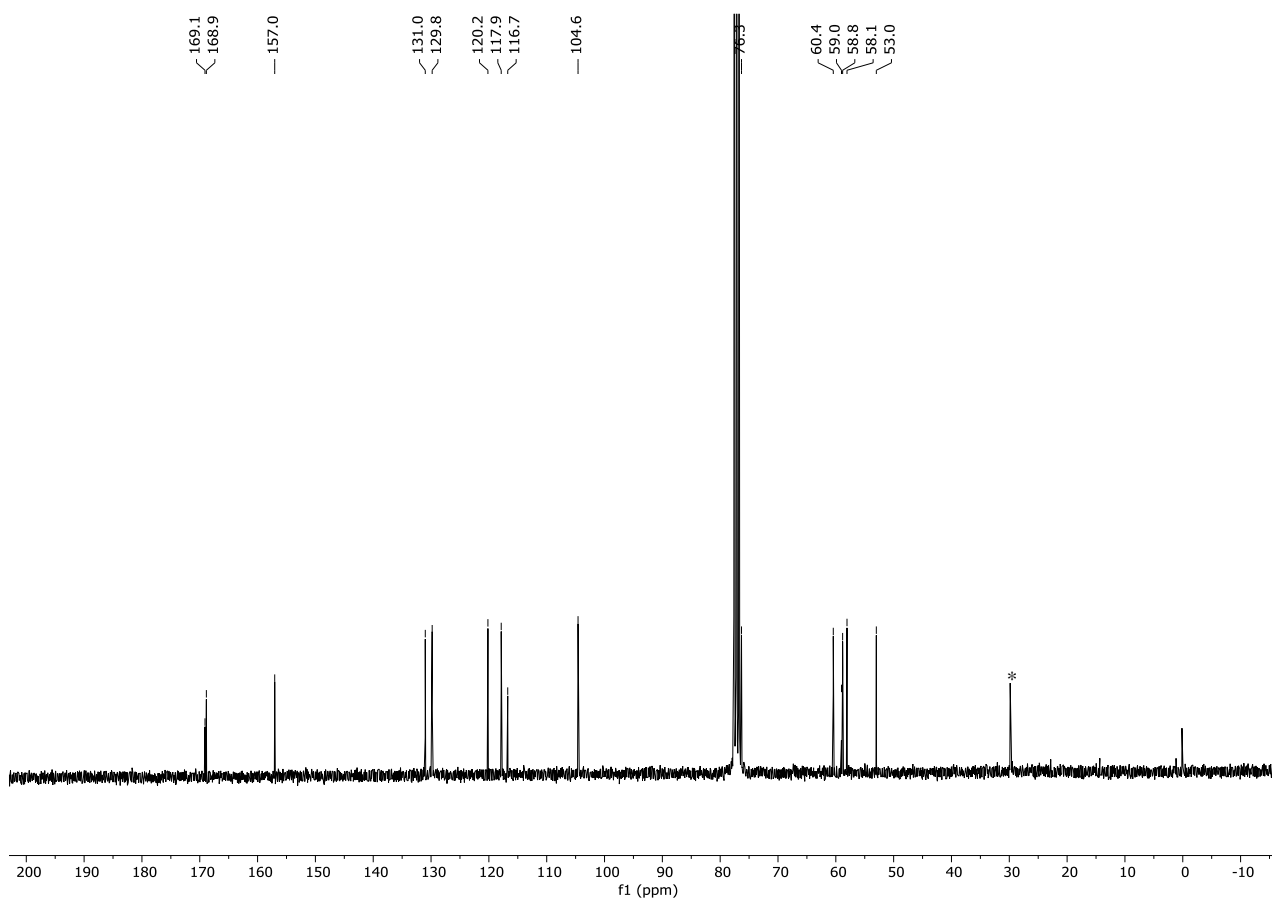

**Figure S72.** <sup>13</sup>C NMR spectrum (75 MHz, 298K, CDCl<sub>3</sub>) of **4v** (\*grease peak).

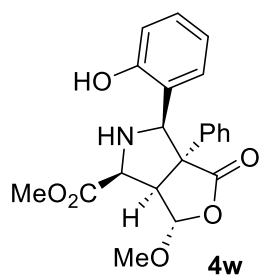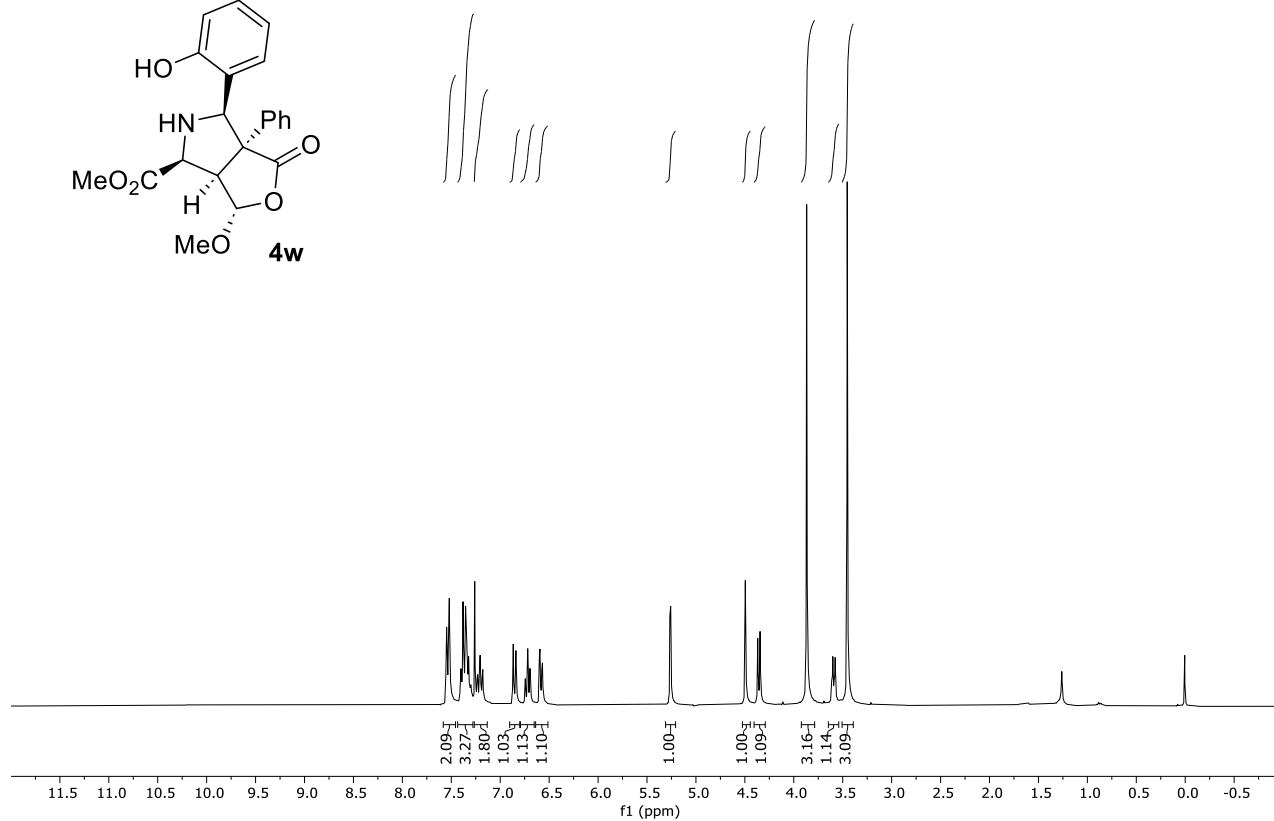

**Figure S73.**  $^1\text{H}$  NMR spectrum (300 MHz, 298K,  $\text{CDCl}_3$ ) of **4w**.

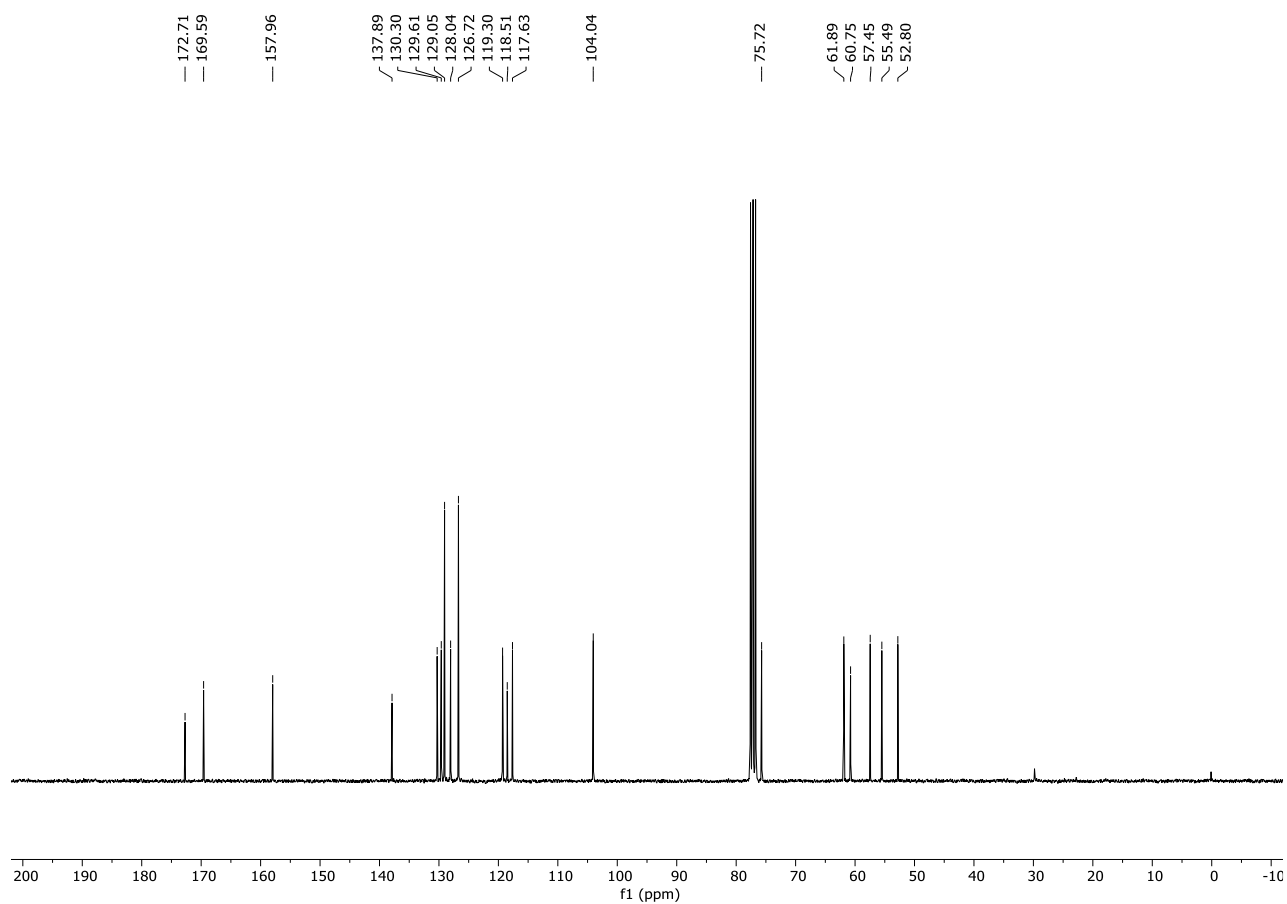

**Figure S74.**  $^{13}\text{C}$  NMR spectrum (75 MHz, 298K,  $\text{CDCl}_3$ ) of **4w**.

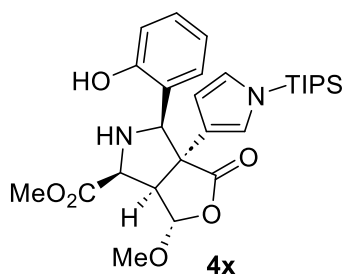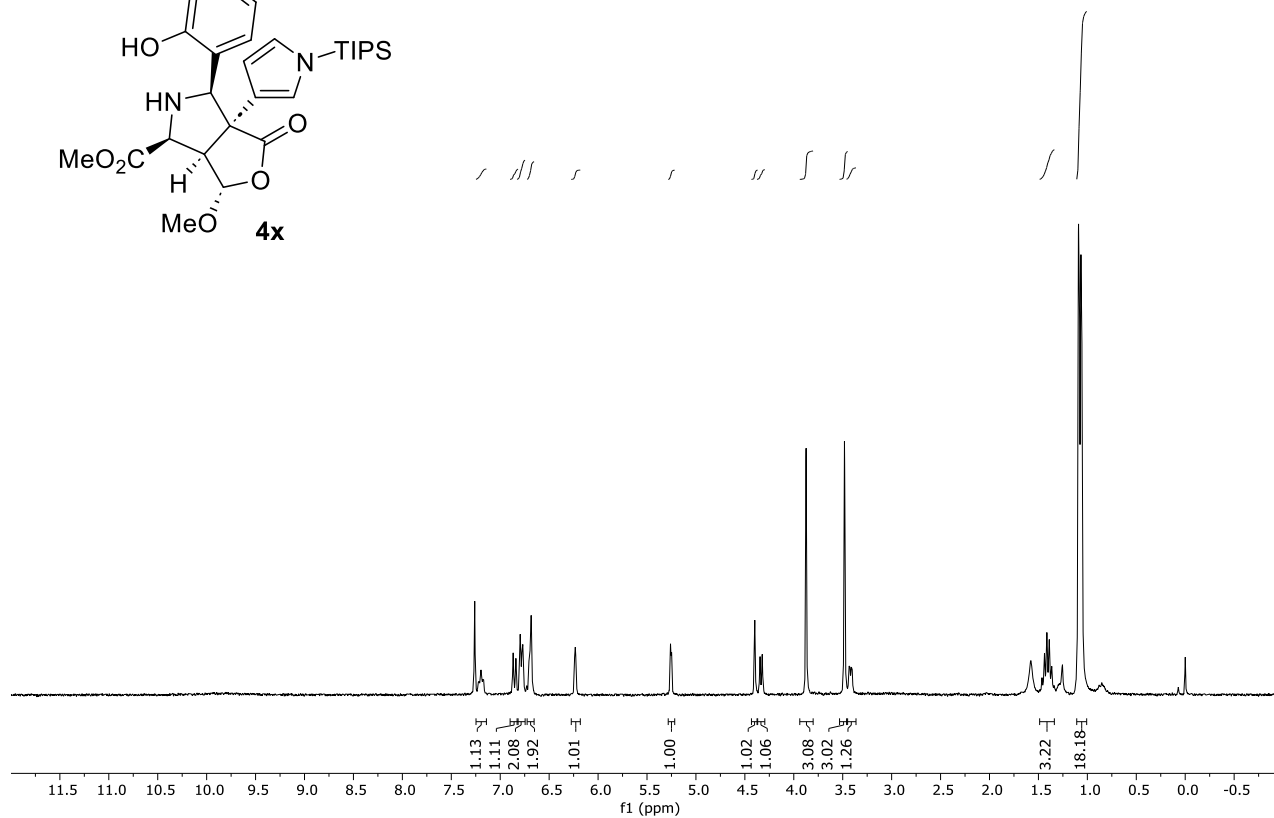

**Figure S75.**  $^1\text{H}$  NMR spectrum (300 MHz, 298K,  $\text{CDCl}_3$ ) of **4x**.

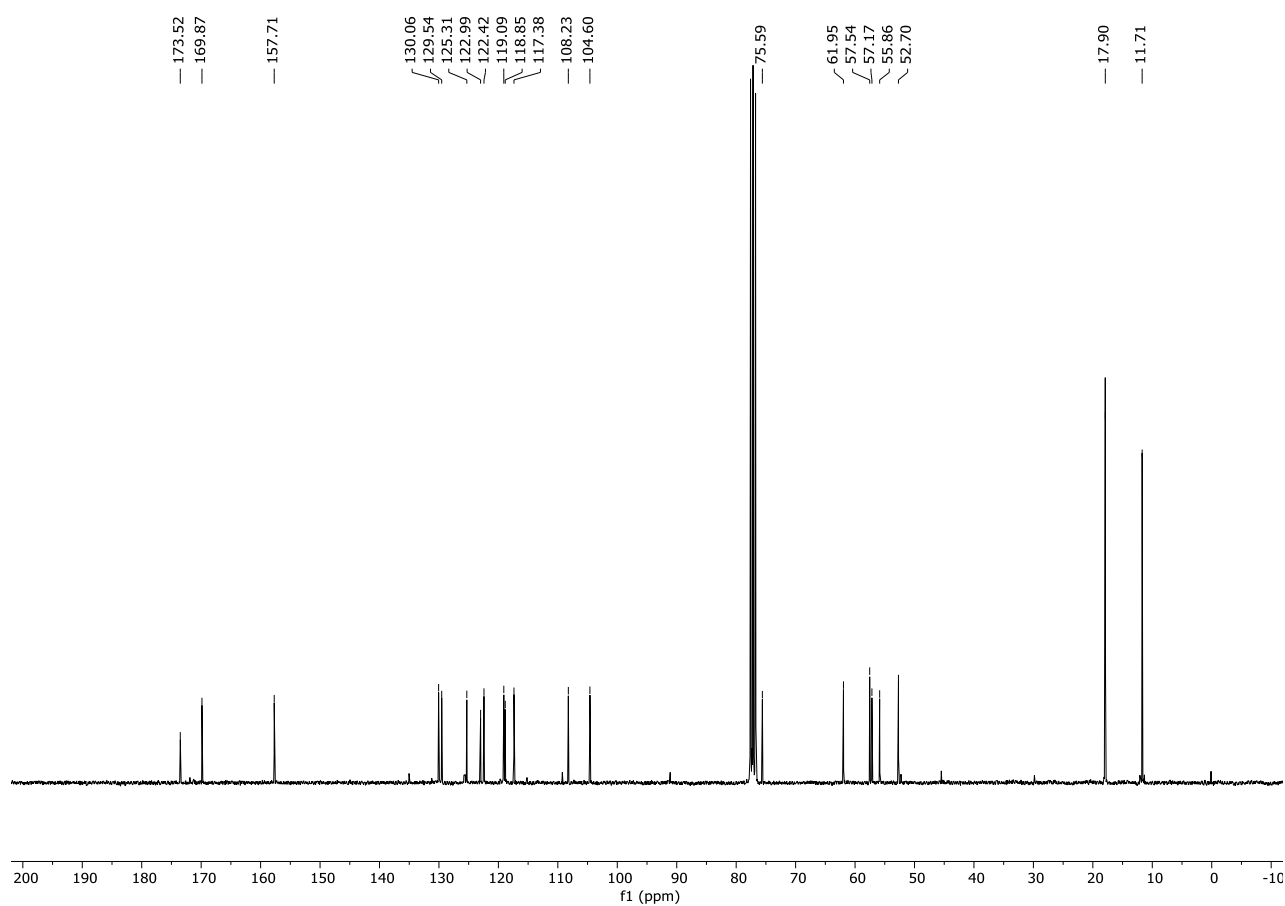

**Figure S76.**  $^{13}\text{C}$  NMR spectrum (75 MHz, 298K,  $\text{CDCl}_3$ ) of **4x**.

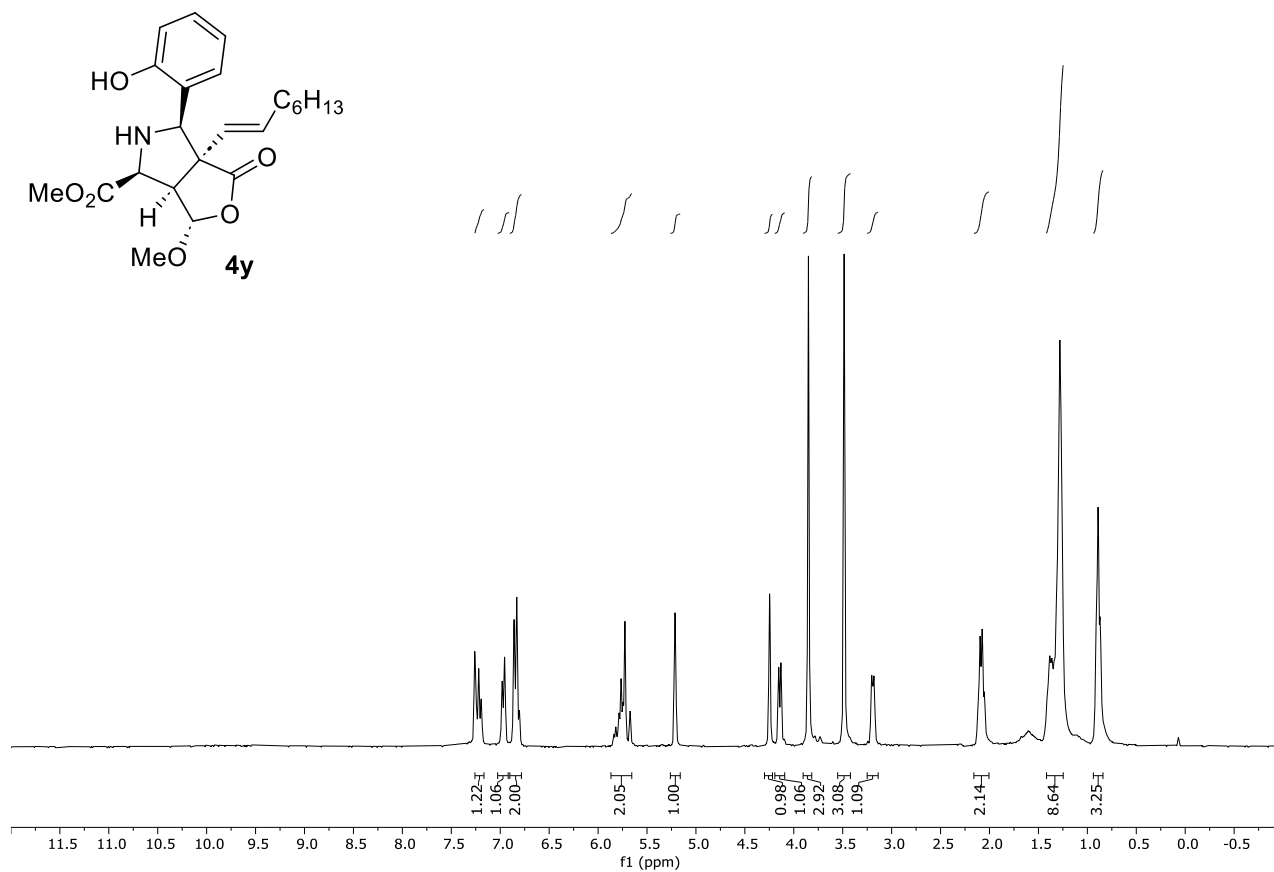

Figure S77. <sup>1</sup>H NMR spectrum (300 MHz, 298K, CDCl<sub>3</sub>) of **4y**.

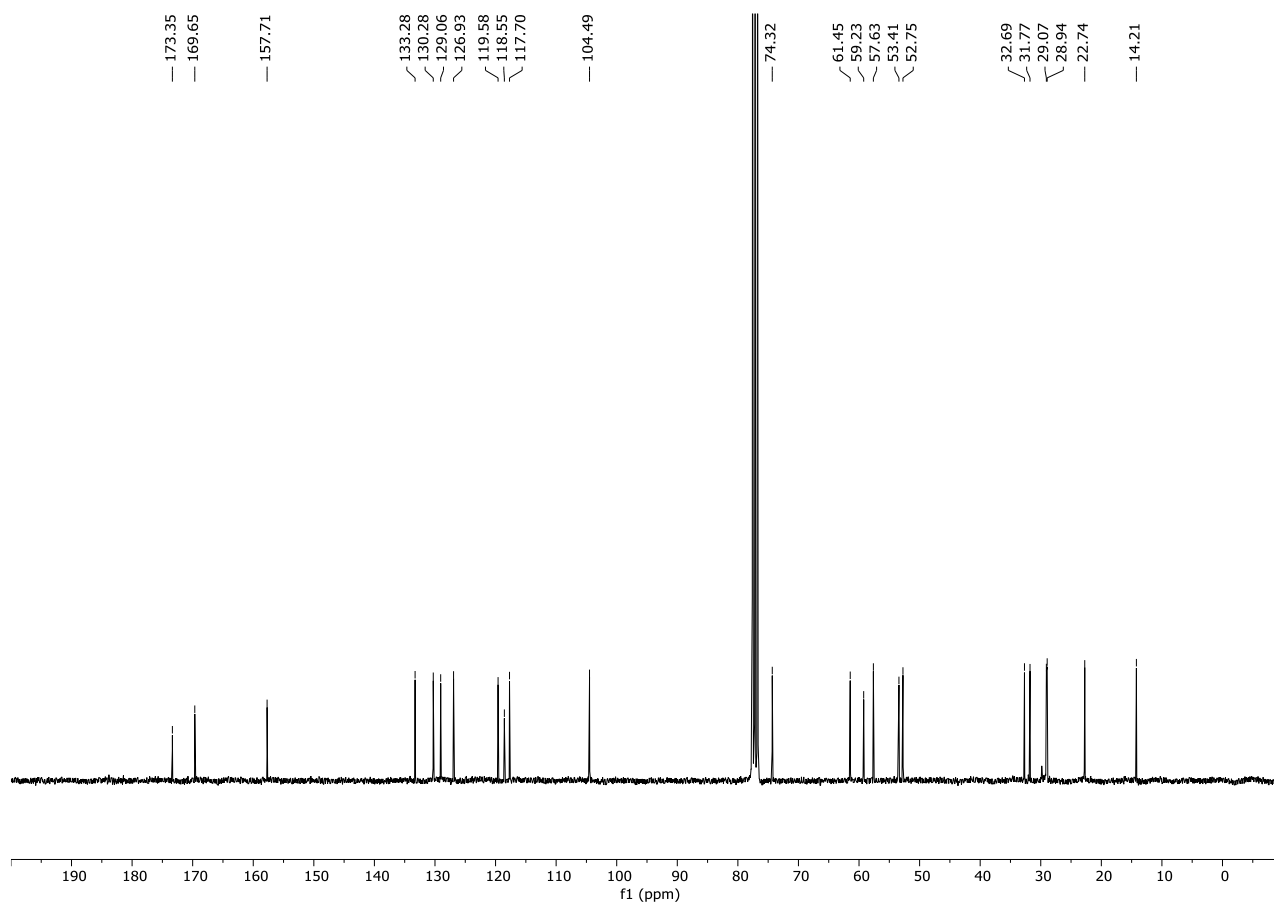

Figure S78. <sup>13</sup>C NMR spectrum (75 MHz, 298K, CDCl<sub>3</sub>) of **4y**.

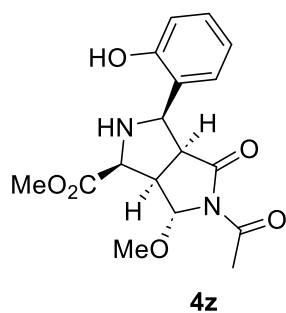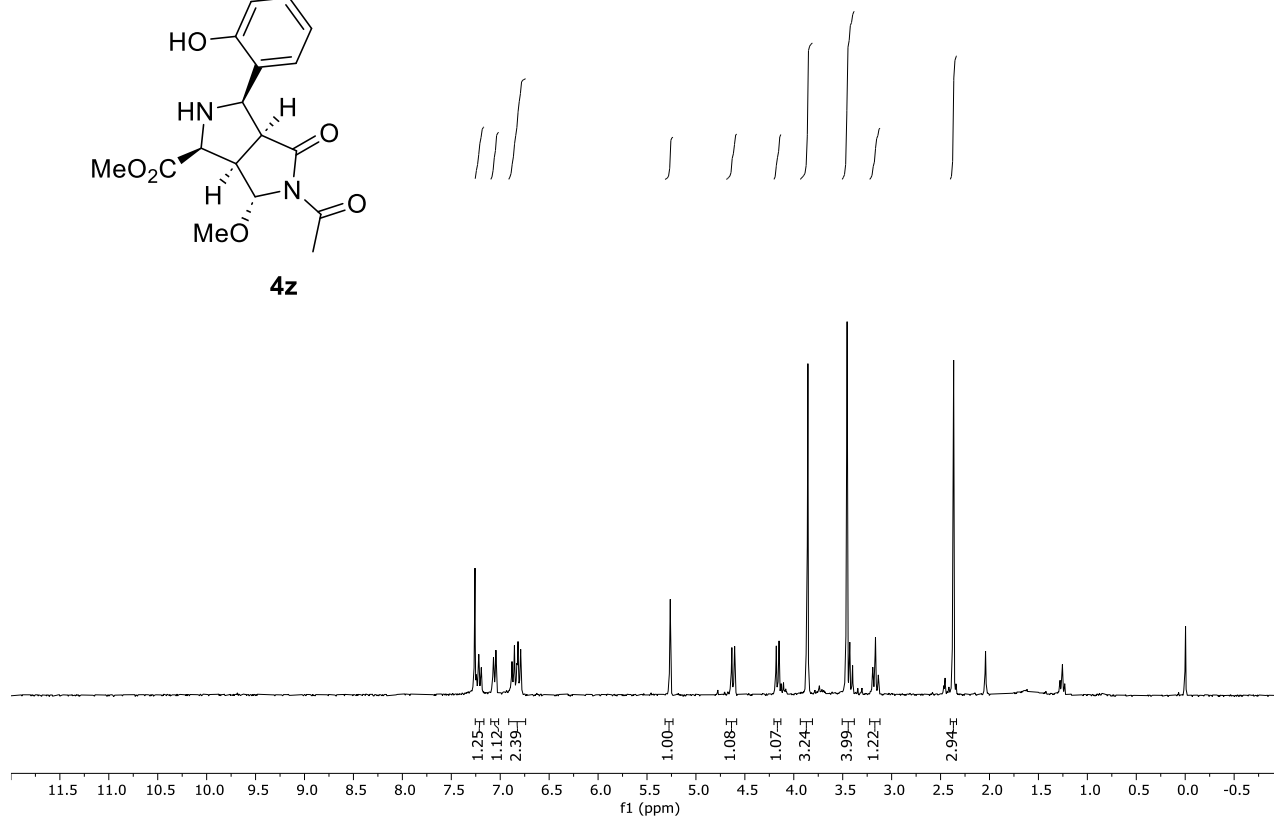

**Figure S79.**  $^1\text{H}$  NMR spectrum (300 MHz, 298K,  $\text{CDCl}_3$ ) of **4z**.

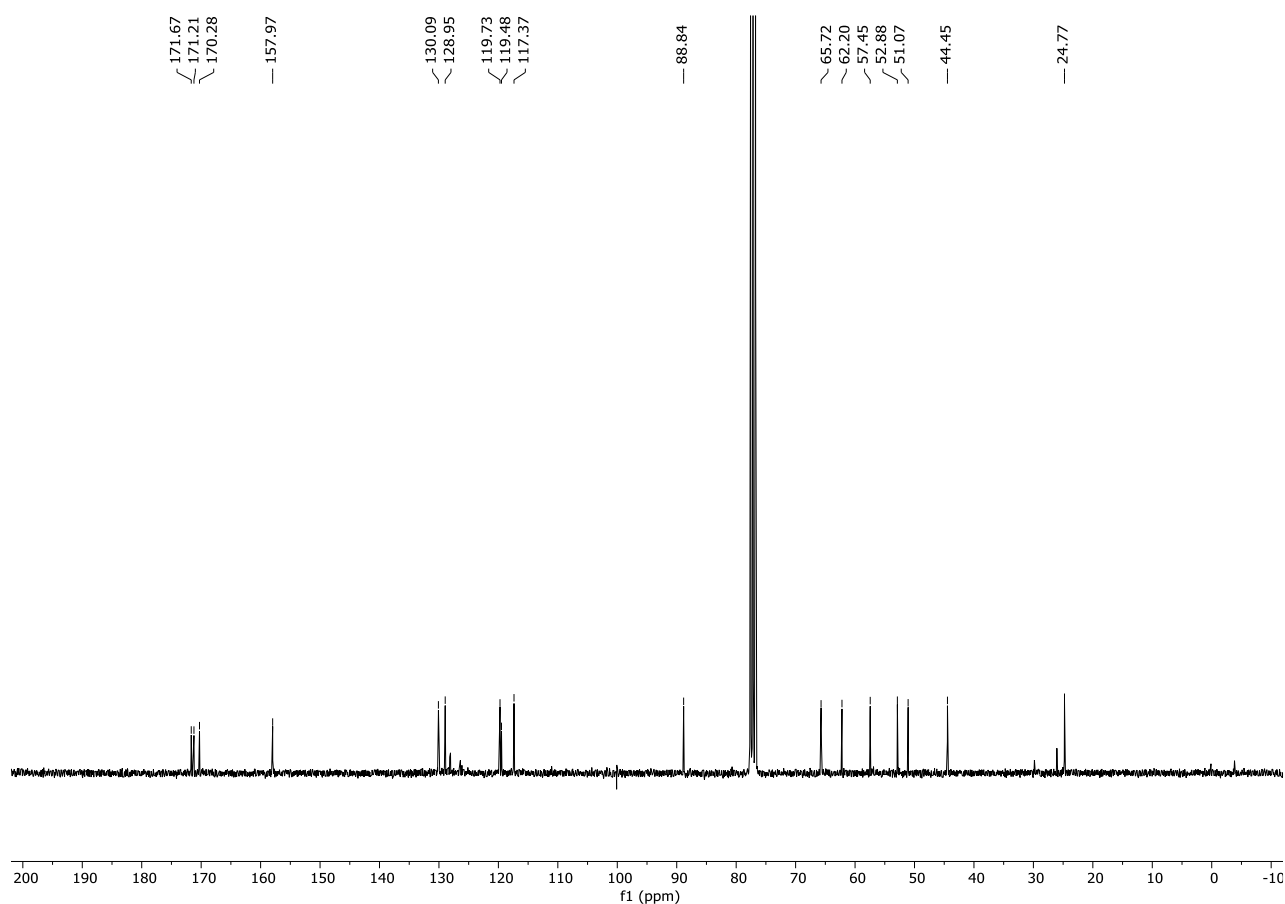

**Figure S80.**  $^{13}\text{C}$  NMR spectrum (75 MHz, 298K,  $\text{CDCl}_3$ ) of **4z**.

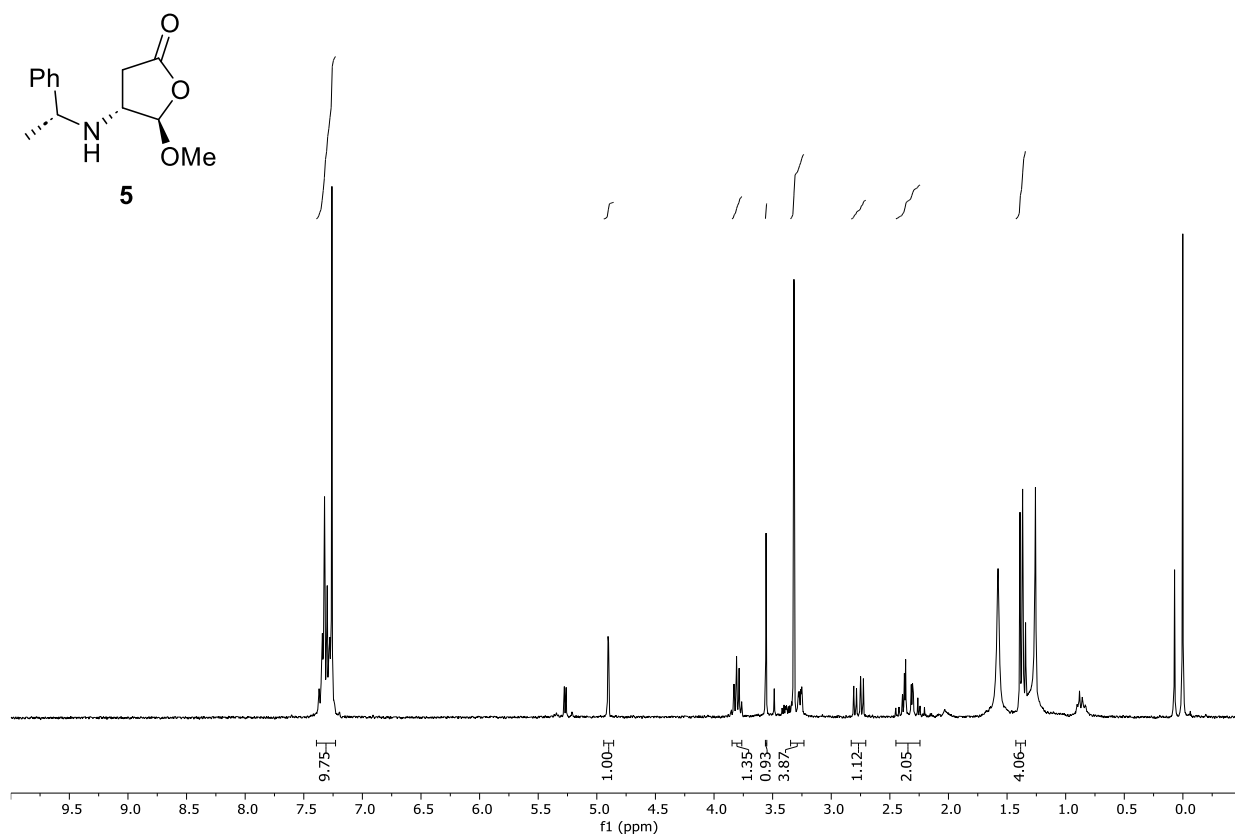

**Figure S81.**  $^1\text{H}$  NMR spectrum (300 MHz, 298K,  $\text{CDCl}_3$ ) of **5**.

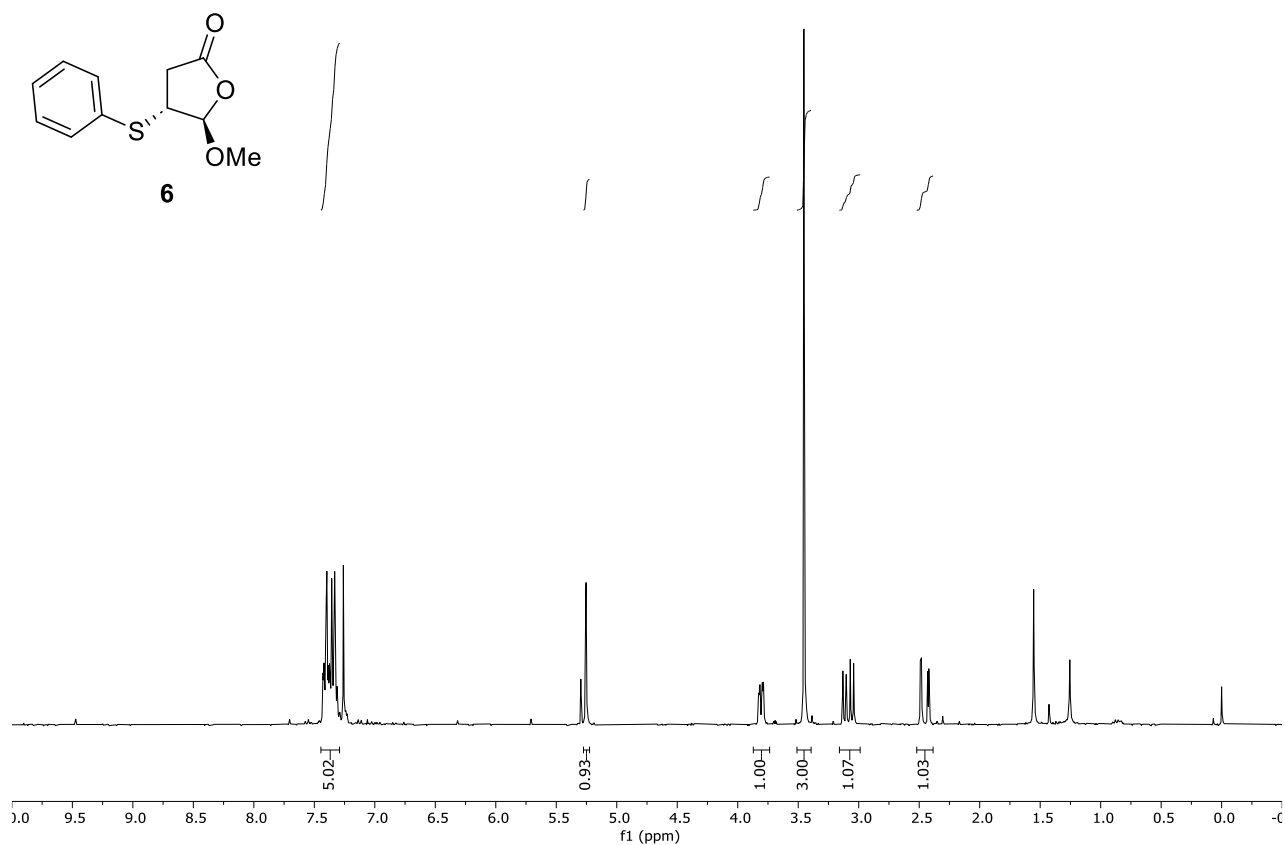

**Figure S82.** <sup>1</sup>H NMR spectrum (300 MHz, 298K, CDCl<sub>3</sub>) of **6**.

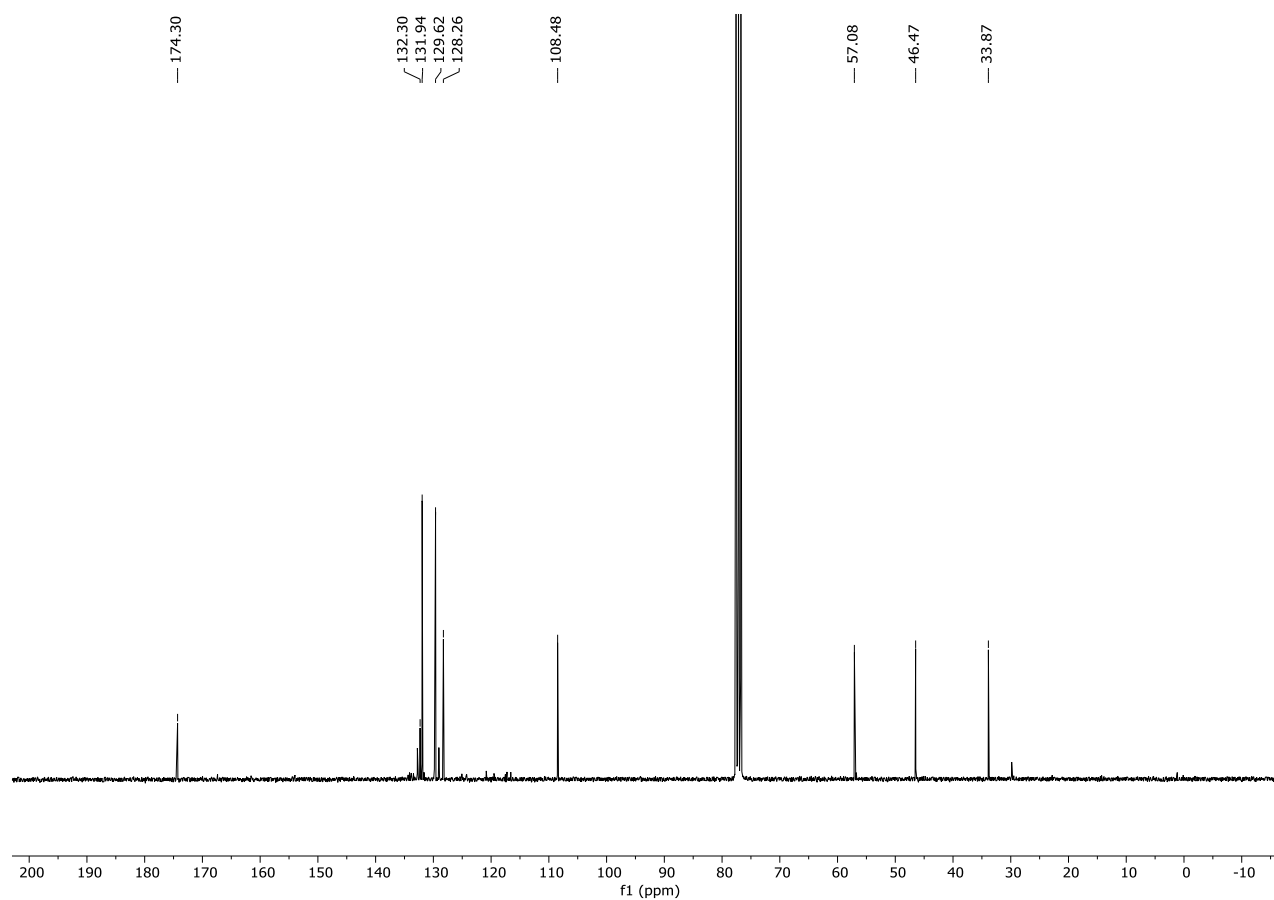

**Figure S83.** <sup>13</sup>C NMR spectrum (76 MHz, 298K, CDCl<sub>3</sub>) of **6**.

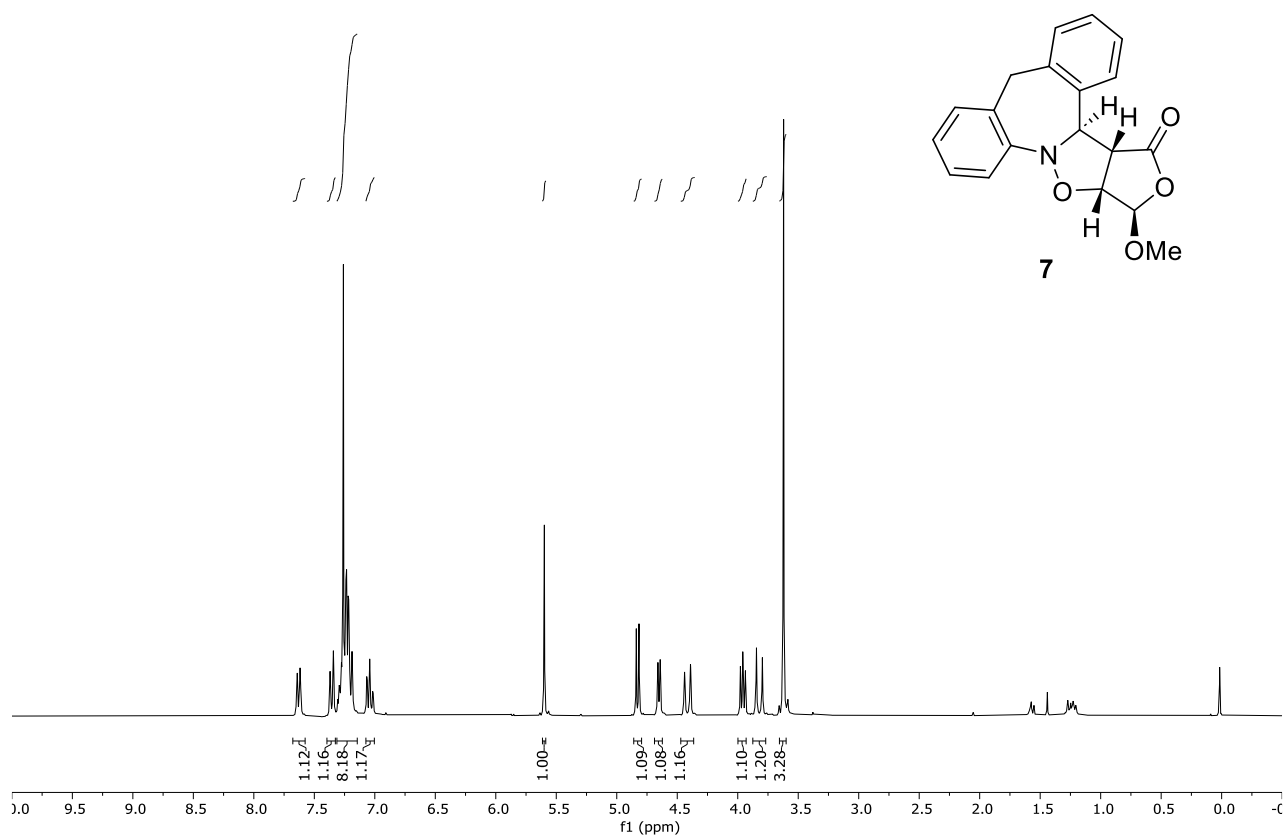

**Figure S84.**  $^1\text{H}$  NMR spectrum (300 MHz, 298K,  $\text{CDCl}_3$ ) of **7**.

# SFC-HPLC traces of cycloadducts 4

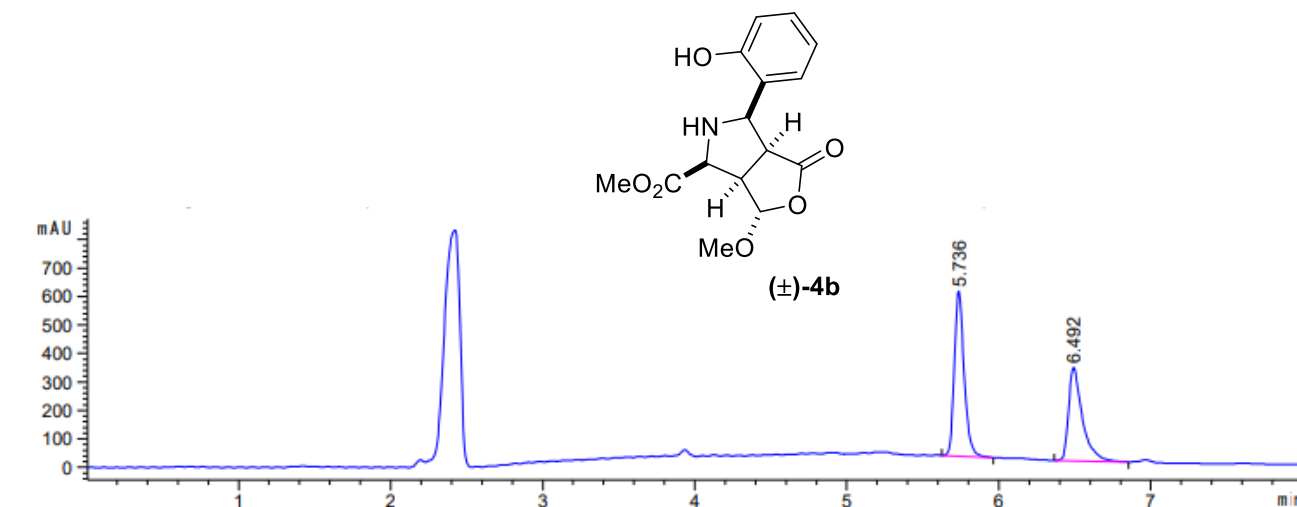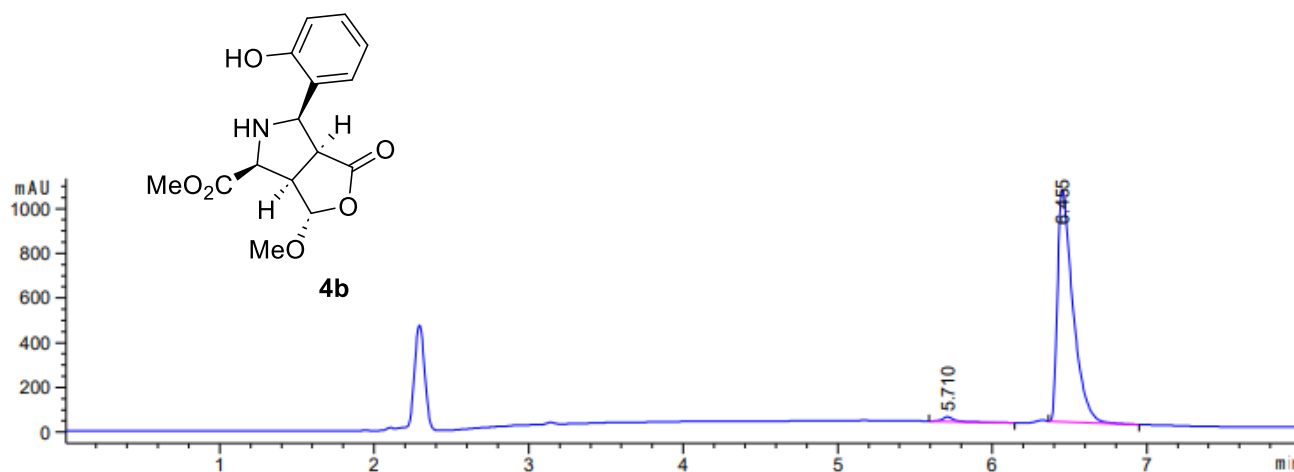

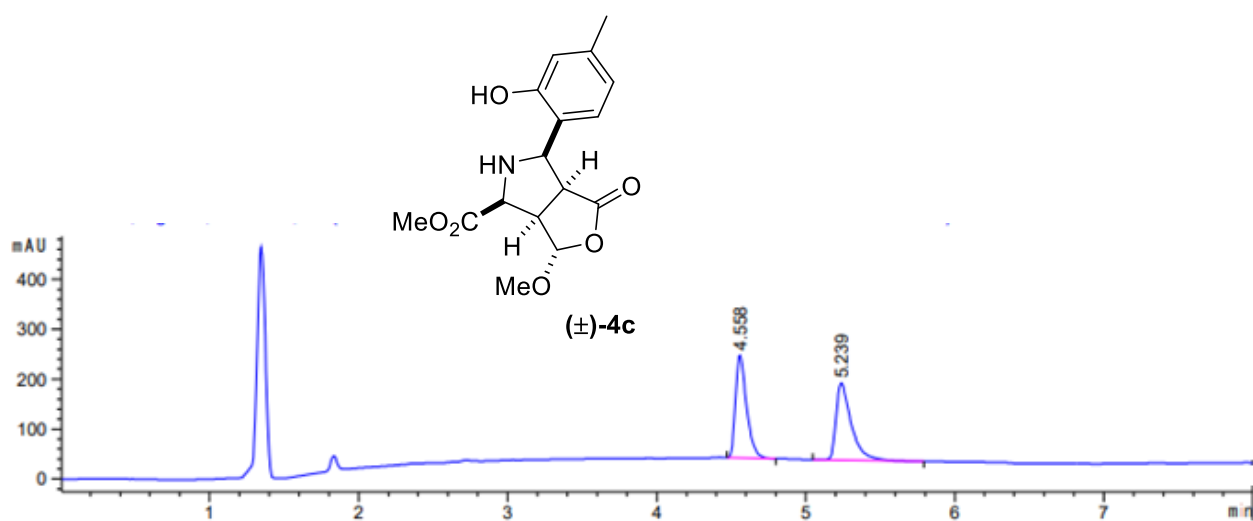

| Peak # | RetTime [min] | Type | Width [min] | Area [mAU*s] | Height [mAU] | Area %  |
|--------|---------------|------|-------------|--------------|--------------|---------|
| 1      | 4.558         | BB   | 0.0779      | 1058.68726   | 206.35347    | 49.0448 |
| 2      | 5.239         | BB   | 0.1052      | 1099.92419   | 154.32478    | 50.9552 |

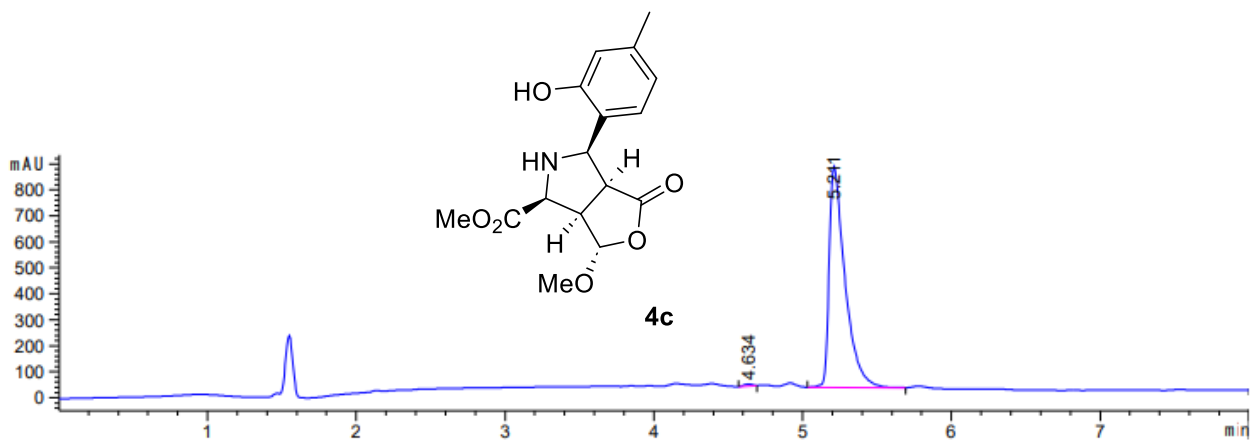

| Peak # | RetTime [min] | Type | Width [min] | Area [mAU*s] | Height [mAU] | Area %  |
|--------|---------------|------|-------------|--------------|--------------|---------|
| 1      | 4.634         | BB   | 0.0569      | 27.30670     | 7.79204      | 0.4318  |
| 2      | 5.211         | BB   | 0.1082      | 6296.65430   | 852.02948    | 99.5682 |

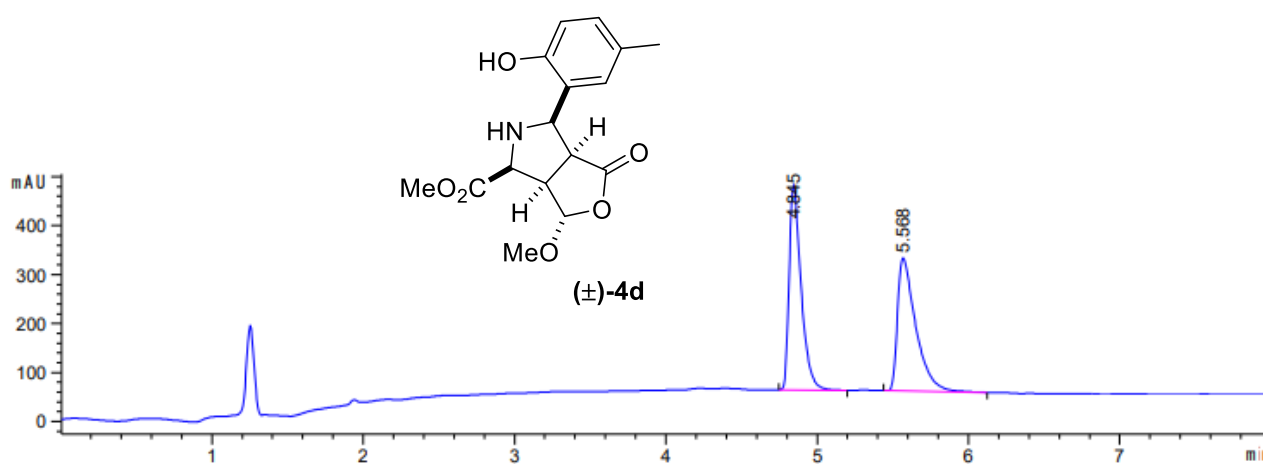

| Peak # | RetTime [min] | Type | Width [min] | Area [mAU*s] | Height [mAU] | Area %  |
|--------|---------------|------|-------------|--------------|--------------|---------|
| 1      | 4.845         | BB   | 0.0822      | 2295.54297   | 417.29117    | 50.2135 |
| 2      | 5.568         | BB   | 0.1235      | 2276.02222   | 272.27835    | 49.7865 |

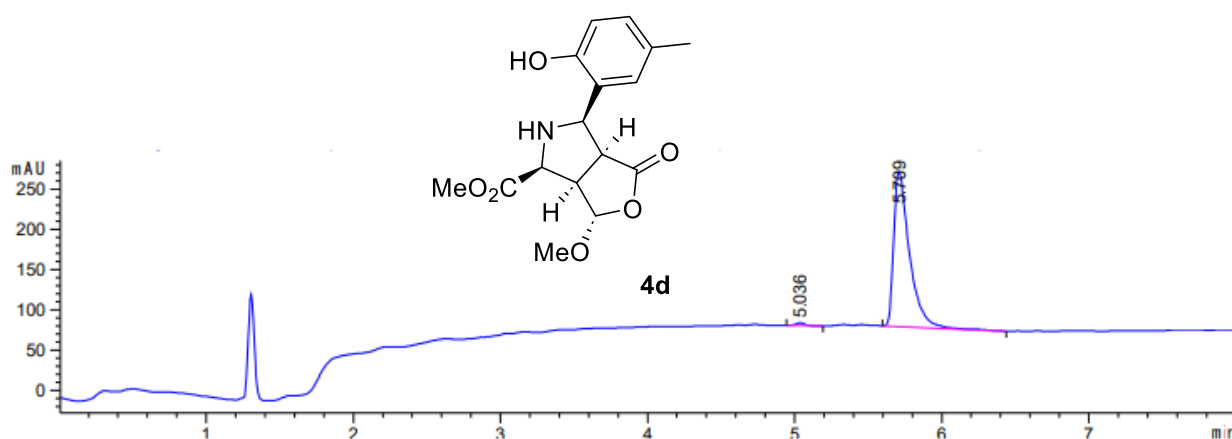

| Peak # | RetTime [min] | Type | Width [min] | Area [mAU*s] | Height [mAU] | Area %  |
|--------|---------------|------|-------------|--------------|--------------|---------|
| 1      | 5.036         | BB   | 0.0652      | 14.72874     | 3.49230      | 1.0185  |
| 2      | 5.709         | BB   | 0.1108      | 1431.42139   | 192.49759    | 98.9815 |

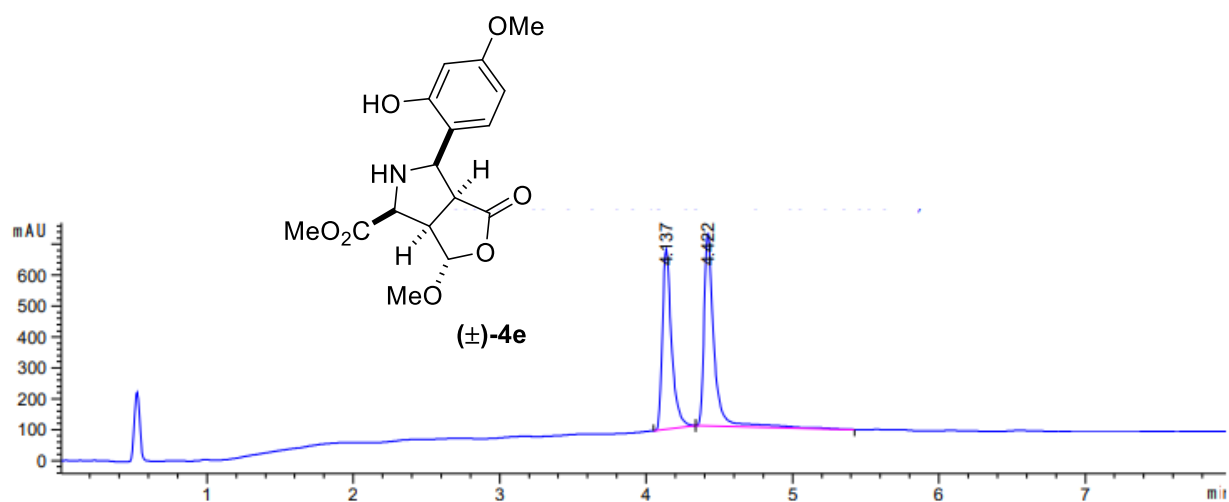

| Peak # | RetTime [min] | Type | Width [min] | Area [mAU*s] | Height [mAU] | Area %  |
|--------|---------------|------|-------------|--------------|--------------|---------|
| 1      | 4.137         | BB   | 0.0648      | 2535.58667   | 582.48053    | 45.8397 |
| 2      | 4.422         | BB   | 0.0699      | 2995.83960   | 624.90186    | 54.1603 |

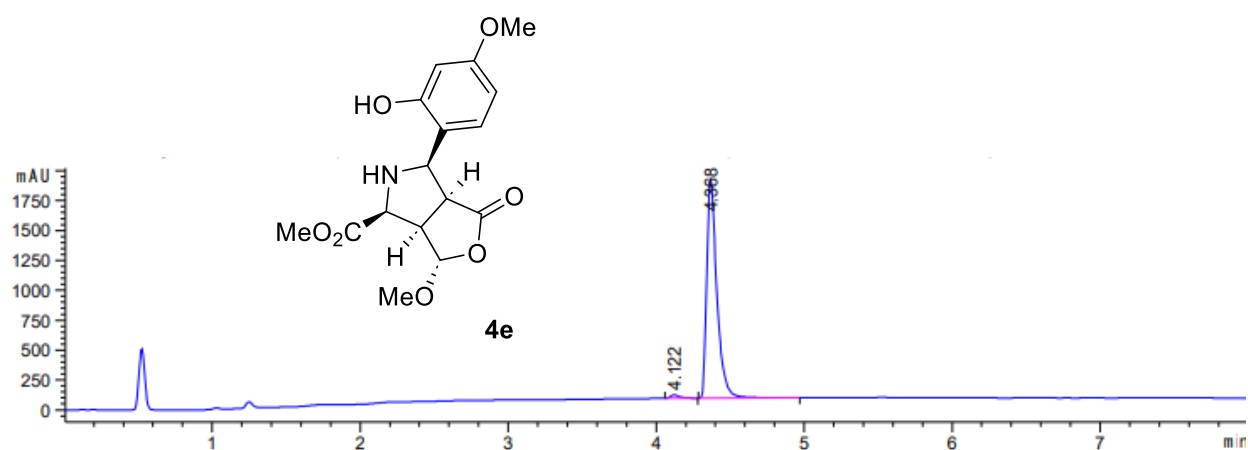

| Peak # | RetTime [min] | Type | Width [min] | Area [mAU*s] | Height [mAU] | Area %  |
|--------|---------------|------|-------------|--------------|--------------|---------|
| 1      | 4.122         | BB   | 0.0634      | 122.03867    | 28.82069     | 1.3849  |
| 2      | 4.368         | BB   | 0.0713      | 8690.03320   | 1832.78967   | 98.6151 |

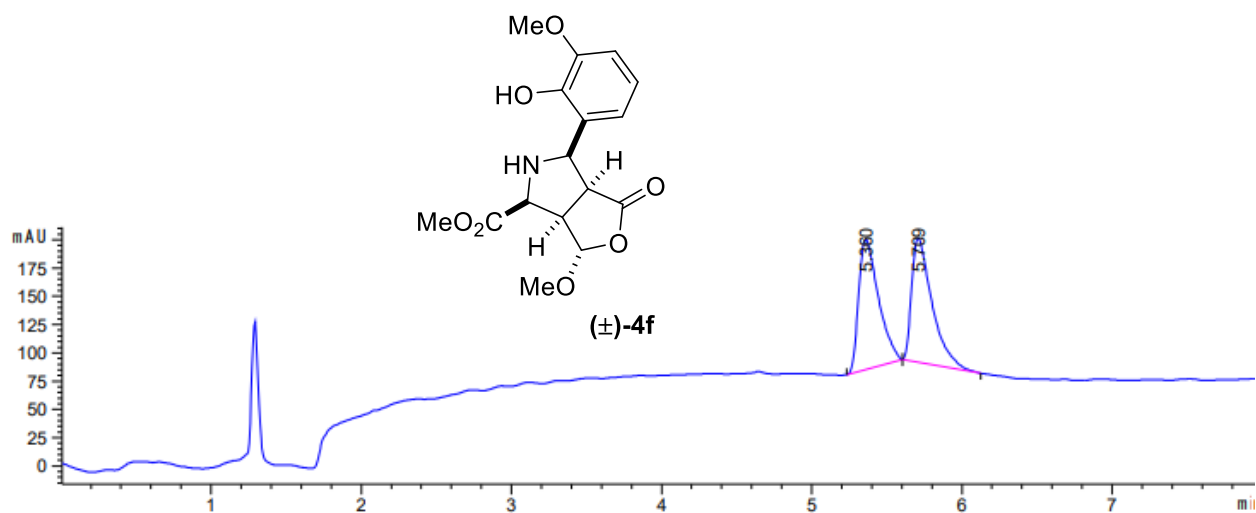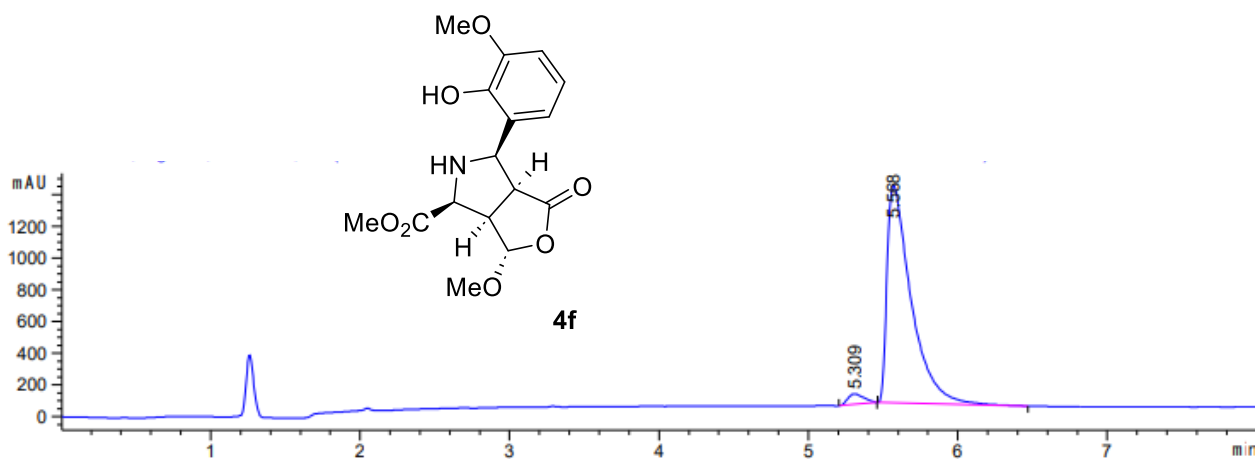

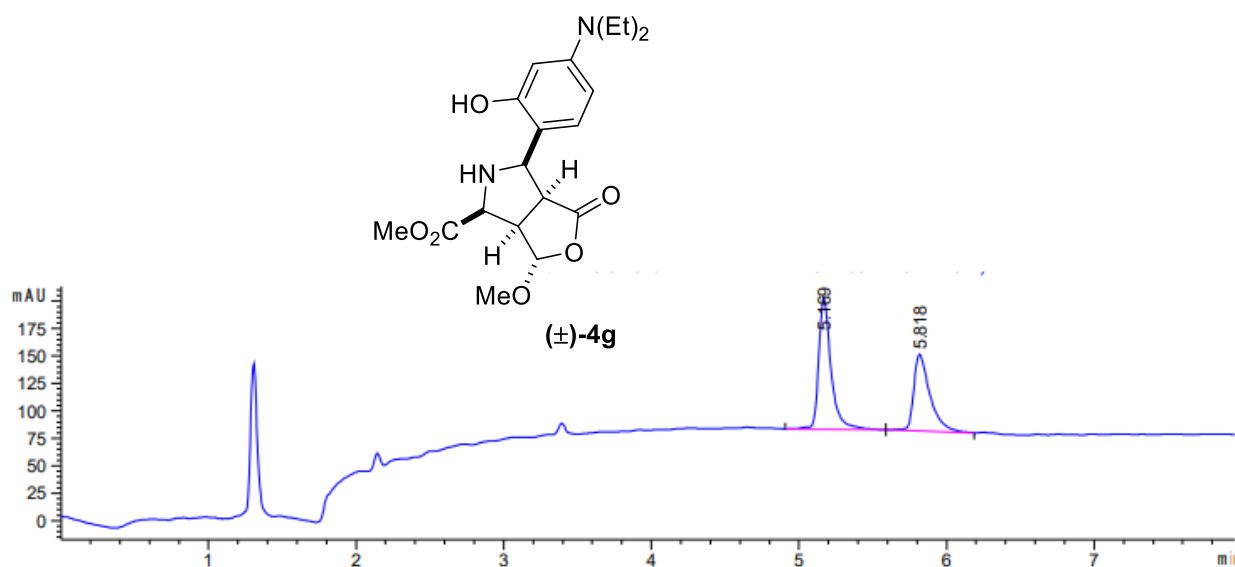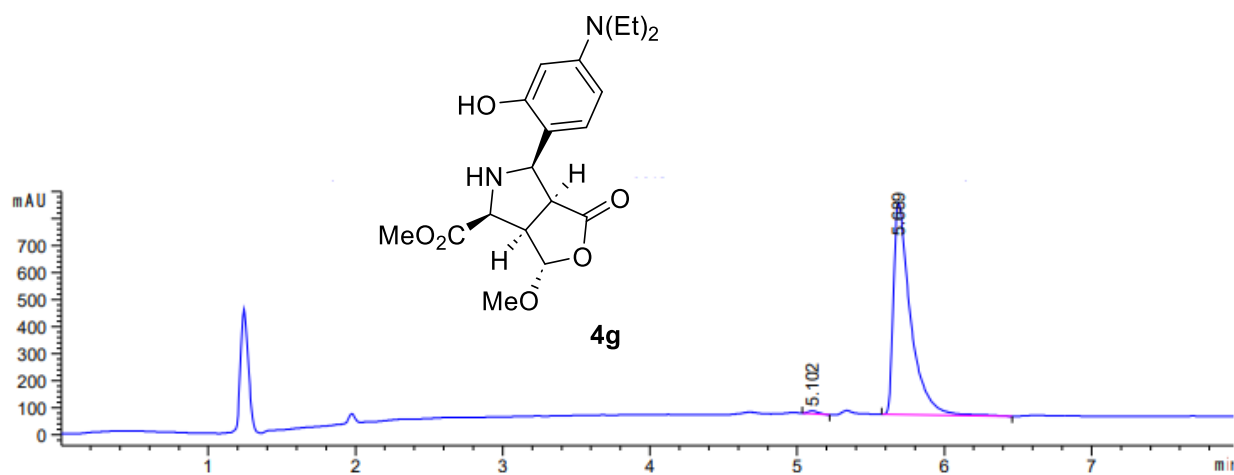

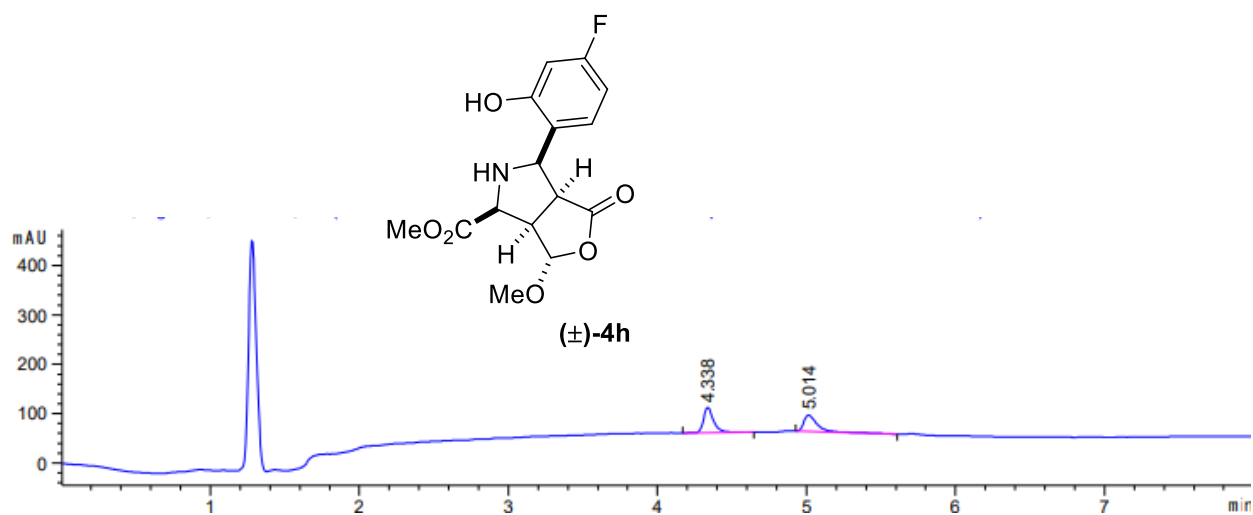

| Peak # | RetTime [min] | Type | Width [min] | Area [mAU*s] | Height [mAU] | Area %  |
|--------|---------------|------|-------------|--------------|--------------|---------|
| 1      | 4.338         | BB   | 0.0685      | 239.95529    | 51.33878     | 51.5016 |
| 2      | 5.014         | BB   | 0.0978      | 225.96268    | 33.89556     | 48.4984 |

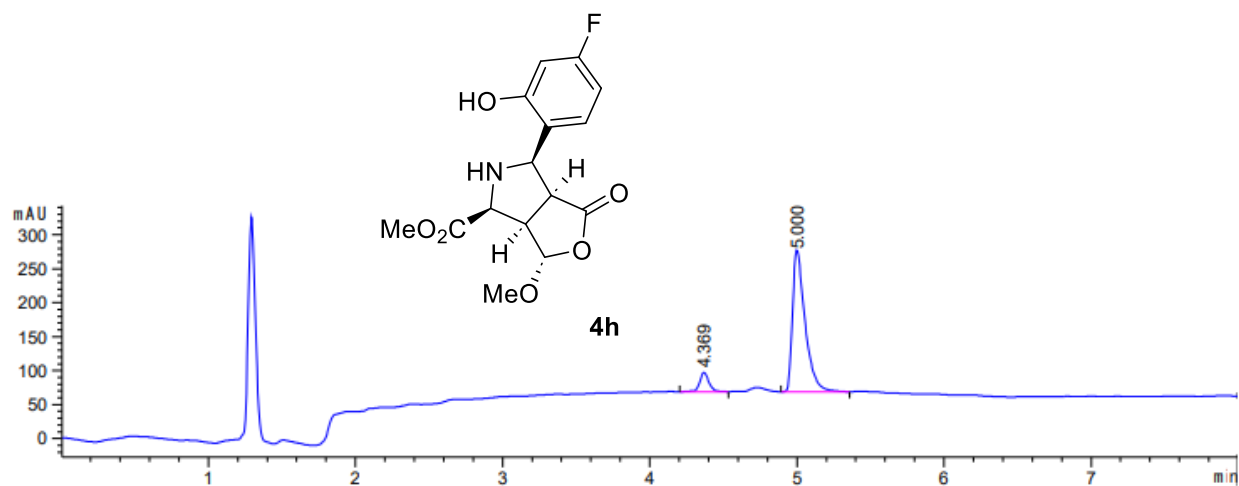

| Peak # | RetTime [min] | Type | Width [min] | Area [mAU*s] | Height [mAU] | Area %  |
|--------|---------------|------|-------------|--------------|--------------|---------|
| 1      | 4.369         | BB   | 0.0664      | 121.22521    | 28.06443     | 8.9298  |
| 2      | 5.000         | BB   | 0.0891      | 1236.31091   | 208.82001    | 91.0702 |

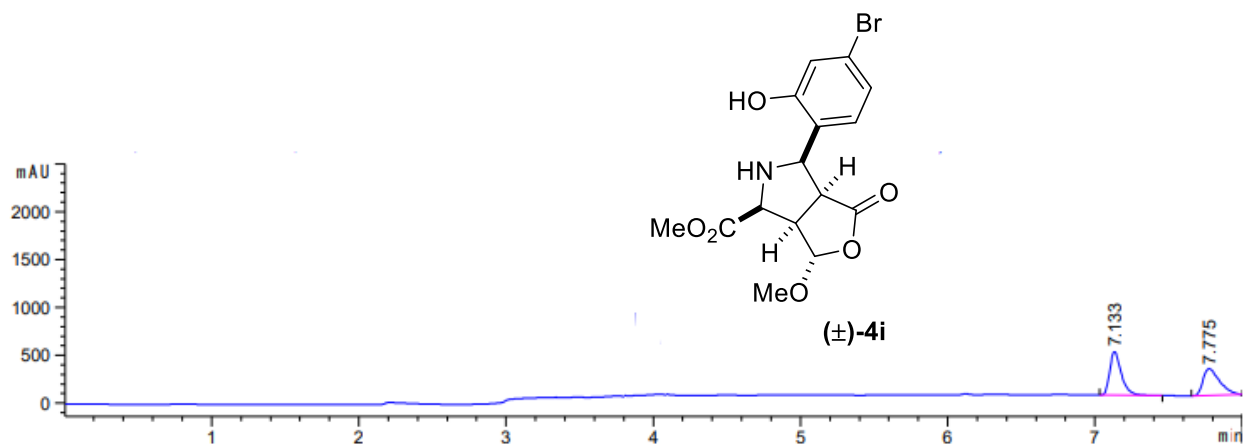

| Peak # | RetTime [min] | Type | Width [min] | Area [mAU*s] | Height [mAU] | Area %  |
|--------|---------------|------|-------------|--------------|--------------|---------|
| 1      | 7.133         | BB   | 0.0841      | 2513.83691   | 457.30008    | 53.2397 |
| 2      | 7.775         | BBA  | 0.1178      | 2207.89526   | 280.58603    | 46.7603 |

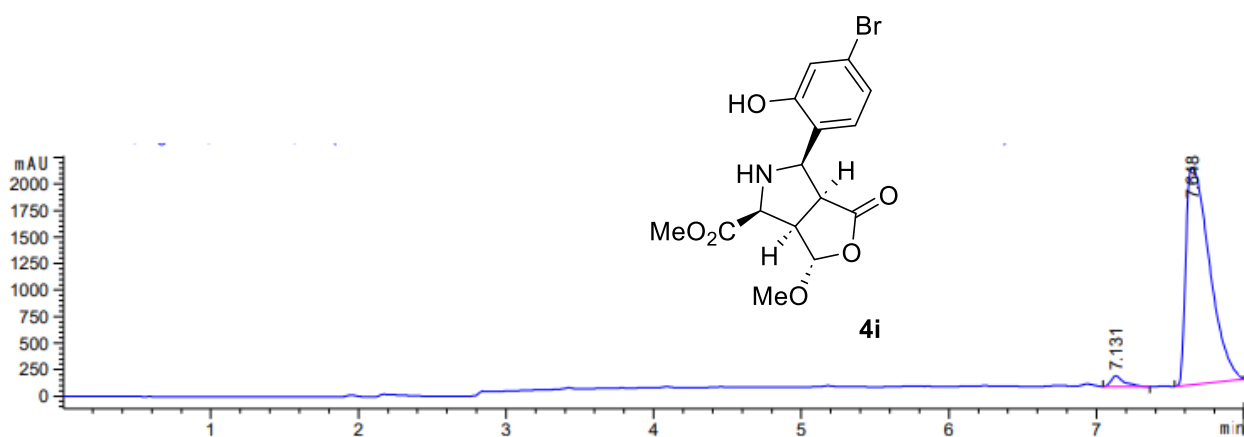

| Peak # | RetTime [min] | Type | Width [min] | Area [mAU*s] | Height [mAU] | Area %  |
|--------|---------------|------|-------------|--------------|--------------|---------|
| 1      | 7.131         | BB   | 0.0915      | 626.37134    | 99.40401     | 2.6731  |
| 2      | 7.648         | BBA  | 0.1738      | 2.28056e4    | 2050.48608   | 97.3269 |

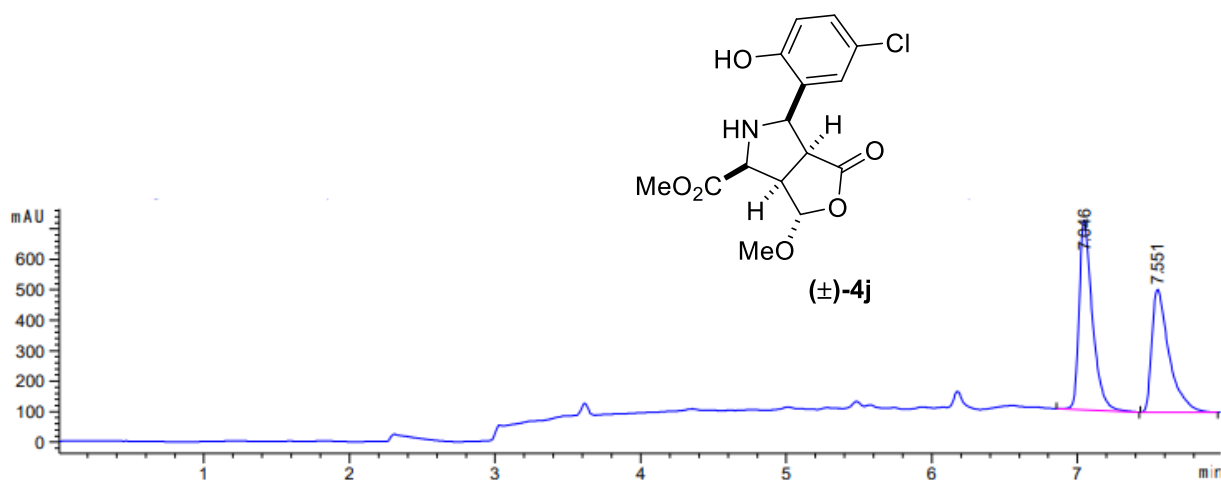

| Peak # | RetTime [min] | Type | Width [min] | Area [mAU*s] | Height [mAU] | Area %  |
|--------|---------------|------|-------------|--------------|--------------|---------|
| 1      | 7.046         | BB   | 0.0940      | 3957.43066   | 624.23914    | 54.2382 |
| 2      | 7.551         | BBA  | 0.1227      | 3338.96387   | 402.93973    | 45.7618 |

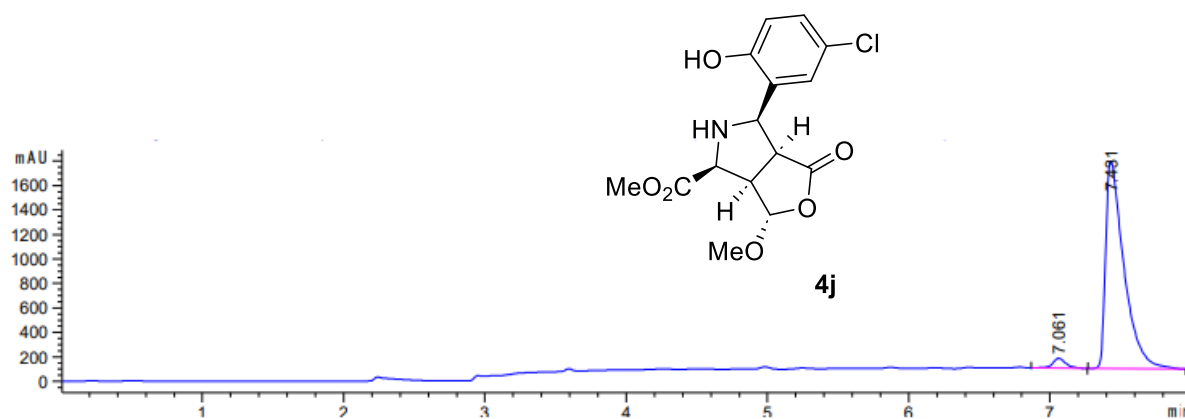

| Peak # | RetTime [min] | Type | Width [min] | Area [mAU*s] | Height [mAU] | Area %  |
|--------|---------------|------|-------------|--------------|--------------|---------|
| 1      | 7.061         | BB   | 0.0979      | 543.06860    | 81.29294     | 3.4424  |
| 2      | 7.431         | BB   | 0.1326      | 1.52329e4    | 1698.23926   | 96.5576 |

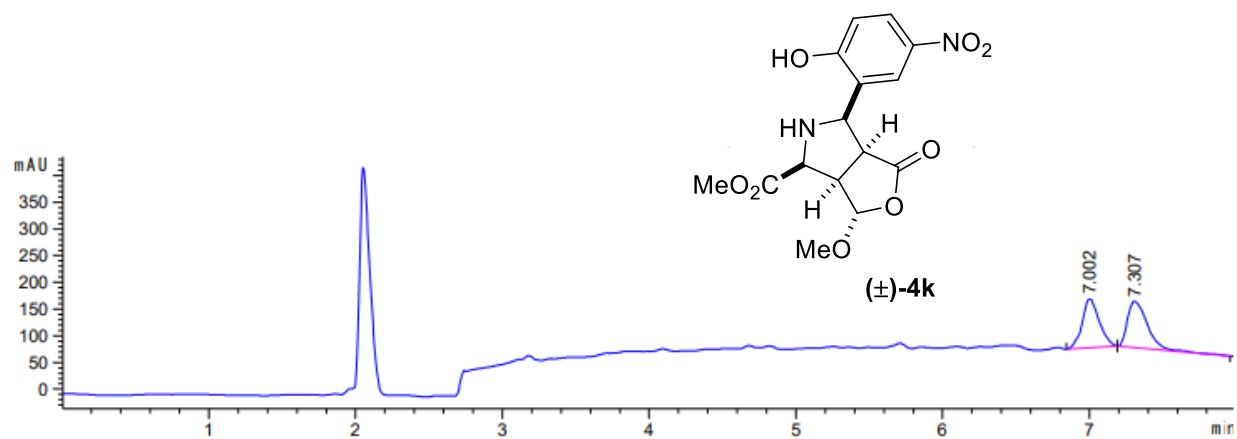

| Peak # | RetTime [min] | Type | Width [min] | Area [mAU*s] | Height [mAU] | Area %  |
|--------|---------------|------|-------------|--------------|--------------|---------|
| 1      | 7.002         | BB   | 0.1201      | 739.17505    | 91.65948     | 47.4253 |
| 2      | 7.307         | BB   | 0.1510      | 819.43323    | 86.12552     | 52.5747 |

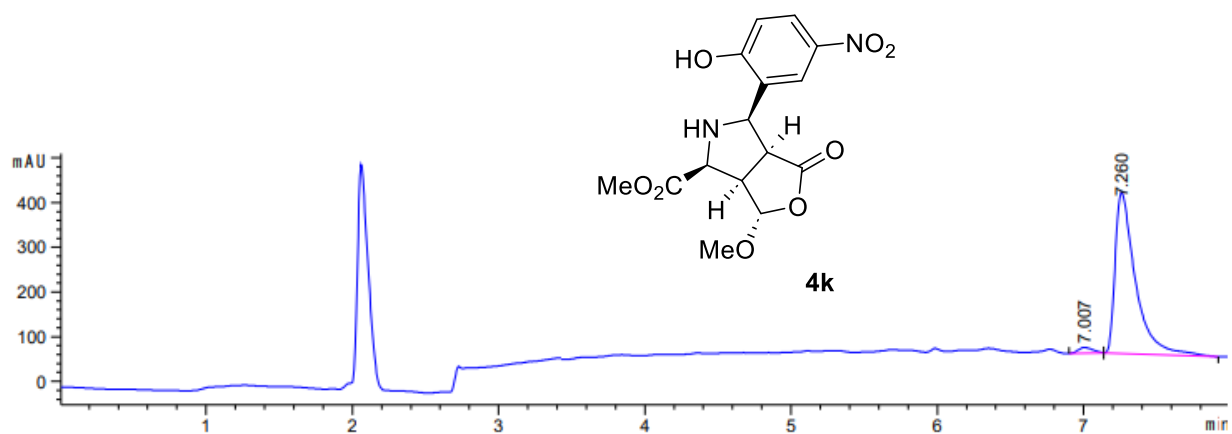

| Peak # | RetTime [min] | Type | Width [min] | Area [mAU*s] | Height [mAU] | Area %  |
|--------|---------------|------|-------------|--------------|--------------|---------|
| 1      | 7.007         | BB   | 0.1118      | 89.30550     | 12.74031     | 2.5021  |
| 2      | 7.260         | BBA  | 0.1404      | 3479.97266   | 361.05930    | 97.4979 |

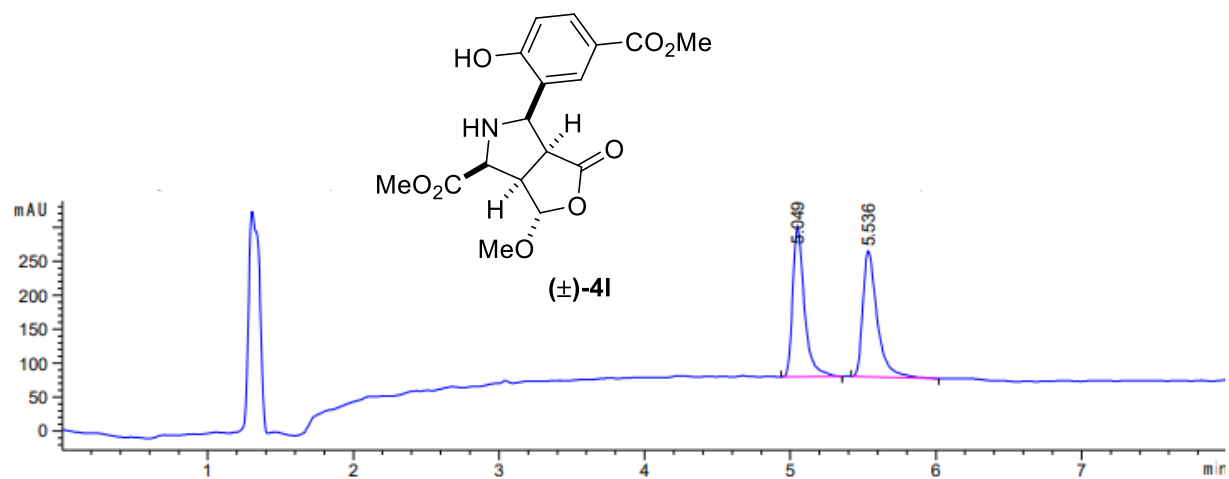

| Peak # | RetTime [min] | Type | Width [min] | Area [mAU*s] | Height [mAU] | Area %  |
|--------|---------------|------|-------------|--------------|--------------|---------|
| 1      | 5.049         | BB   | 0.0830      | 1227.92810   | 220.44093    | 49.0470 |
| 2      | 5.536         | BB   | 0.1026      | 1275.64819   | 184.53412    | 50.9530 |

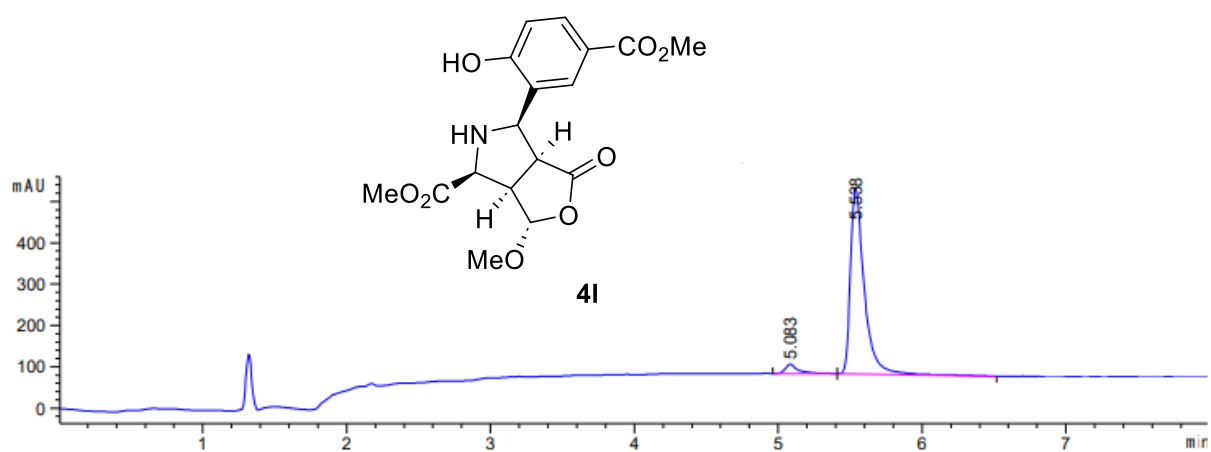

| Peak # | RetTime [min] | Type | Width [min] | Area [mAU*s] | Height [mAU] | Area %  |
|--------|---------------|------|-------------|--------------|--------------|---------|
| 1      | 5.083         | BB   | 0.0910      | 137.75325    | 22.02518     | 4.3500  |
| 2      | 5.538         | BB   | 0.0984      | 3028.96338   | 450.68890    | 95.6500 |

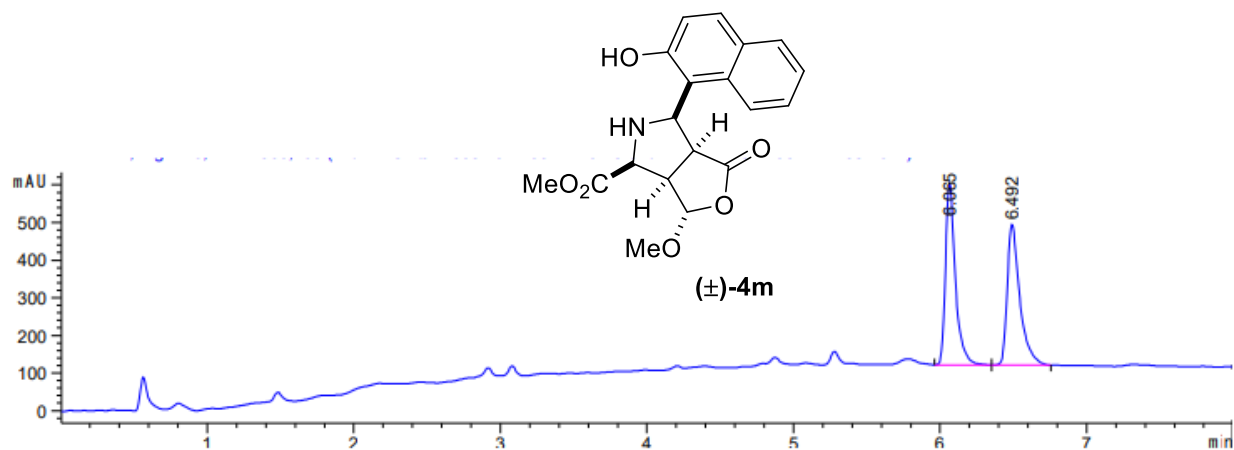

| Peak # | RetTime [min] | Type | Width [min] | Area [mAU*s] | Height [mAU] | Area %  |
|--------|---------------|------|-------------|--------------|--------------|---------|
| 1      | 6.065         | BB   | 0.0691      | 2282.36011   | 482.87964    | 50.5393 |
| 2      | 6.492         | BB   | 0.0877      | 2233.64868   | 374.08179    | 49.4607 |

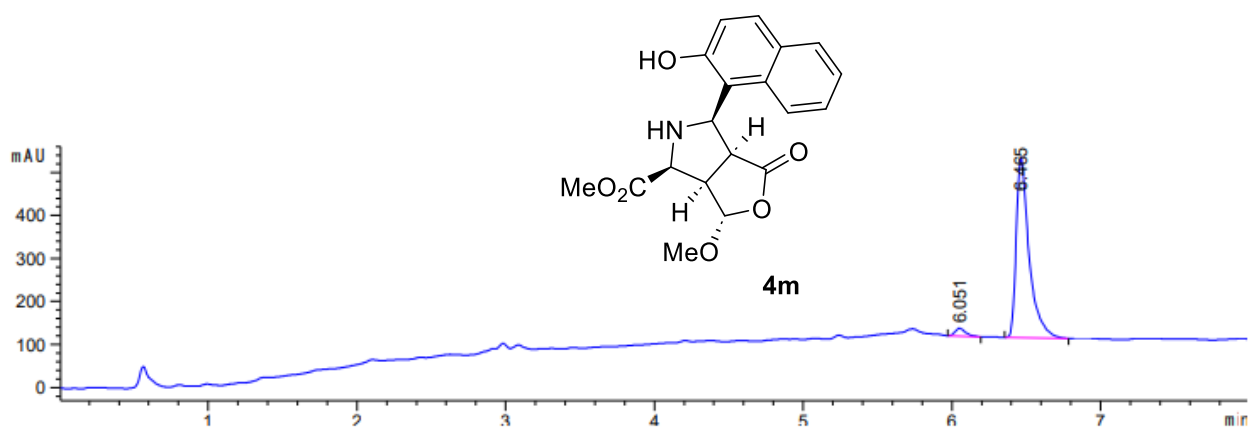

| Peak # | RetTime [min] | Type | Width [min] | Area [mAU*s] | Height [mAU] | Area %  |
|--------|---------------|------|-------------|--------------|--------------|---------|
| 1      | 6.051         | BB   | 0.0730      | 87.97845     | 17.99936     | 3.3819  |
| 2      | 6.465         | BB   | 0.0881      | 2513.49194   | 418.18091    | 96.6181 |

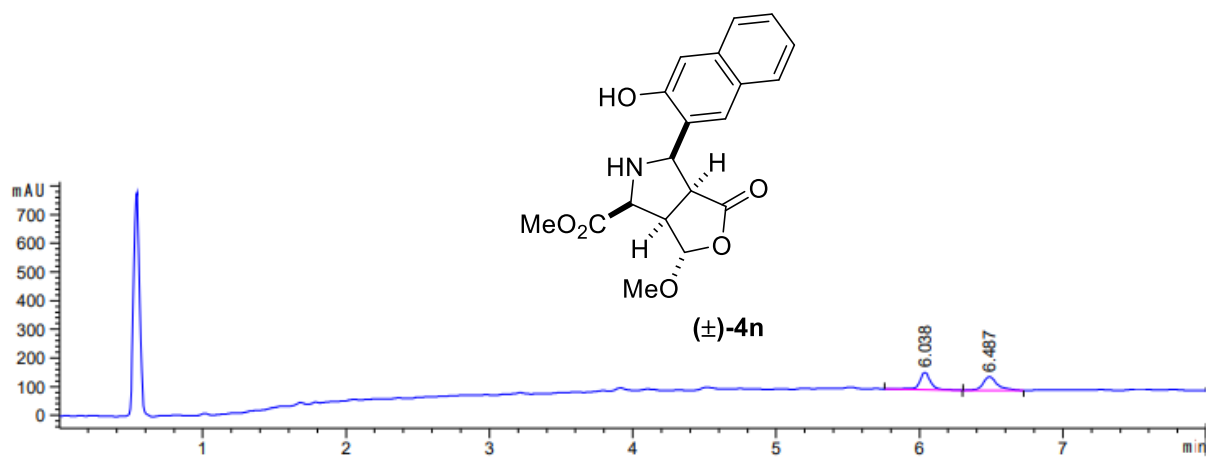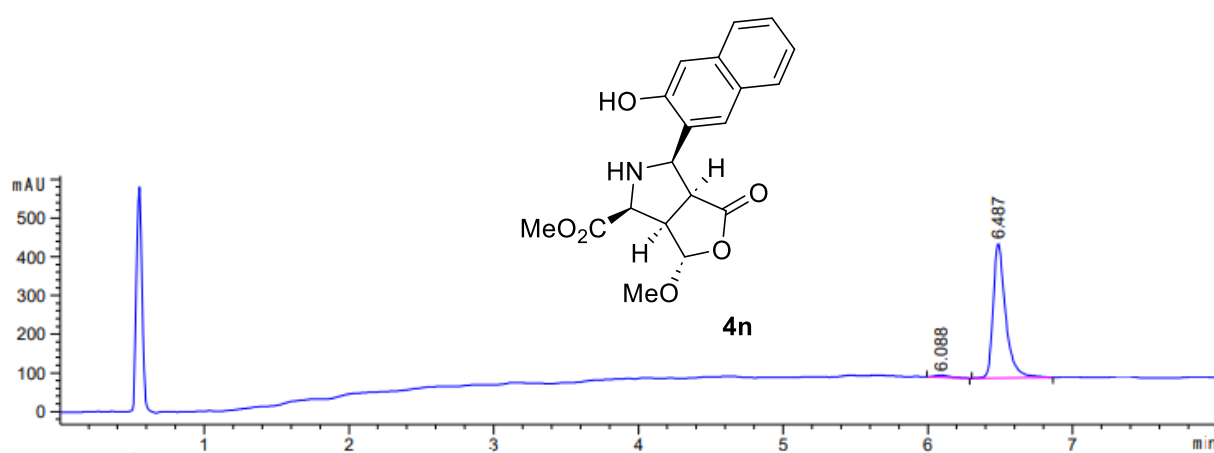

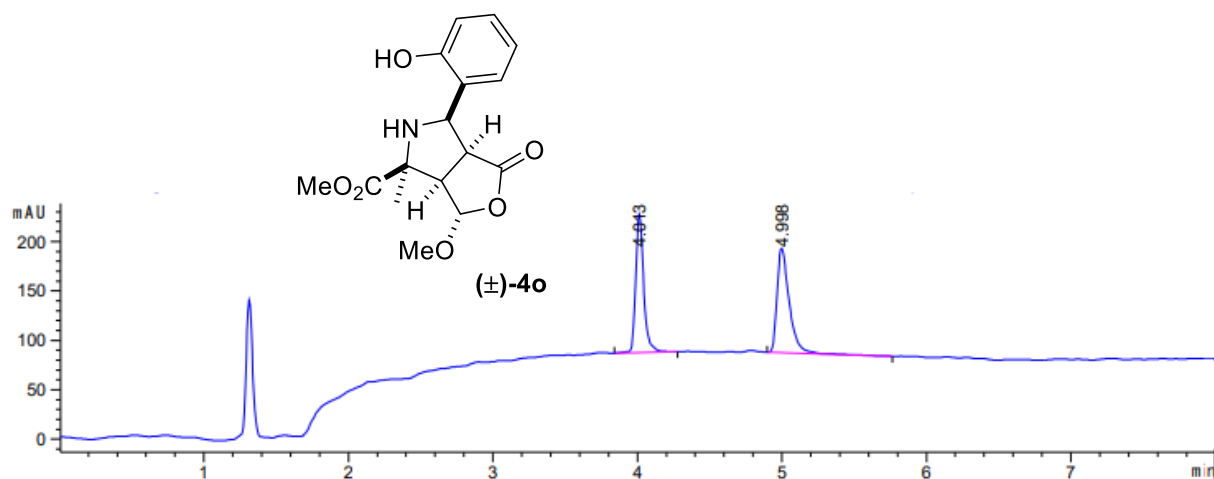

| Peak # | RetTime [min] | Type | Width [min] | Area [mAU*s] | Height [mAU] | Area %  |
|--------|---------------|------|-------------|--------------|--------------|---------|
| 1      | 4.013         | BB   | 0.0589      | 538.08643    | 139.68153    | 46.6384 |
| 2      | 4.998         | BB   | 0.0880      | 615.65424    | 105.68761    | 53.3616 |

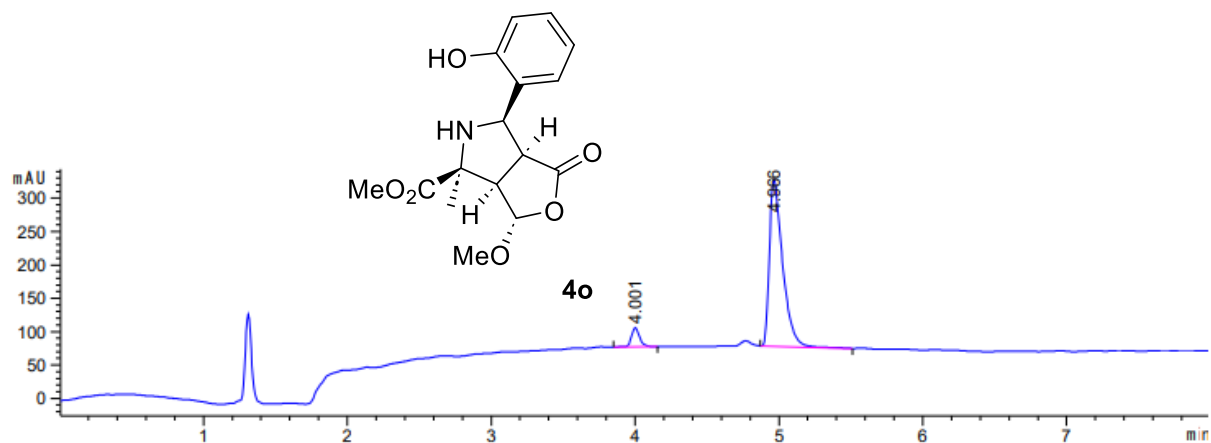

| Peak # | RetTime [min] | Type | Width [min] | Area [mAU*s] | Height [mAU] | Area %  |
|--------|---------------|------|-------------|--------------|--------------|---------|
| 1      | 4.001         | BB   | 0.0597      | 112.80188    | 28.81614     | 6.6294  |
| 2      | 4.966         | BB   | 0.0944      | 1588.74573   | 249.13206    | 93.3706 |

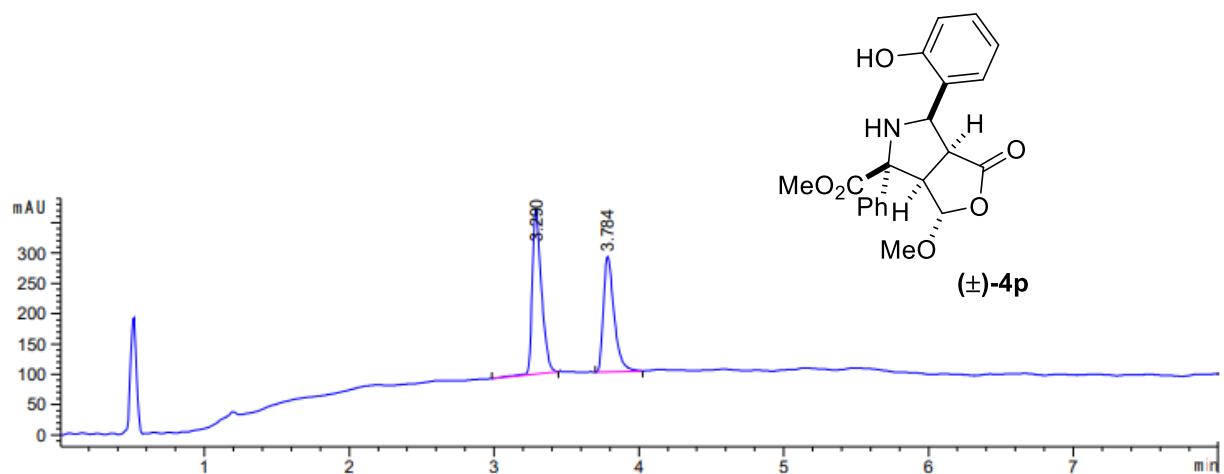

| Peak # | RetTime [min] | Type | Width [min] | Area [mAU*s] | Height [mAU] | Area %  |
|--------|---------------|------|-------------|--------------|--------------|---------|
| 1      | 3.290         | BB   | 0.0649      | 1192.72998   | 273.64426    | 54.9658 |
| 2      | 3.784         | BB   | 0.0779      | 977.22021    | 190.29283    | 45.0342 |

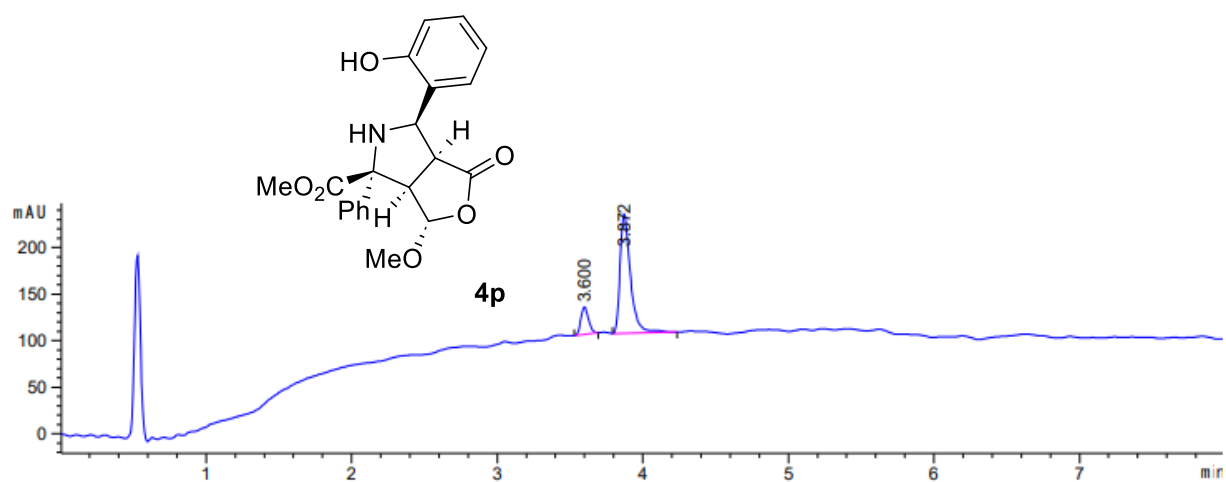

| Peak # | RetTime [min] | Type | Width [min] | Area [mAU*s] | Height [mAU] | Area %  |
|--------|---------------|------|-------------|--------------|--------------|---------|
| 1      | 3.600         | BB   | 0.0566      | 107.60847    | 29.49168     | 14.4796 |
| 2      | 3.872         | BB   | 0.0760      | 635.56671    | 127.74203    | 85.5204 |

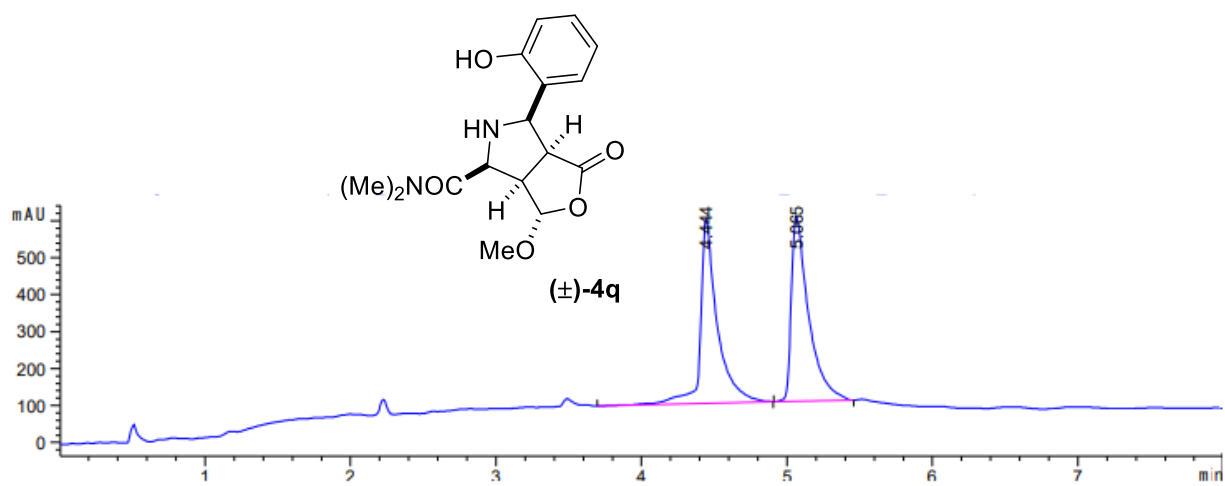

| Peak # | RetTime [min] | Type | Width [min] | Area [mAU*s] | Height [mAU] | Area %  |
|--------|---------------|------|-------------|--------------|--------------|---------|
| 1      | 4.444         | BB   | 0.1127      | 4048.04419   | 498.48538    | 49.4924 |
| 2      | 5.065         | BB   | 0.1184      | 4131.08447   | 500.07193    | 50.5076 |

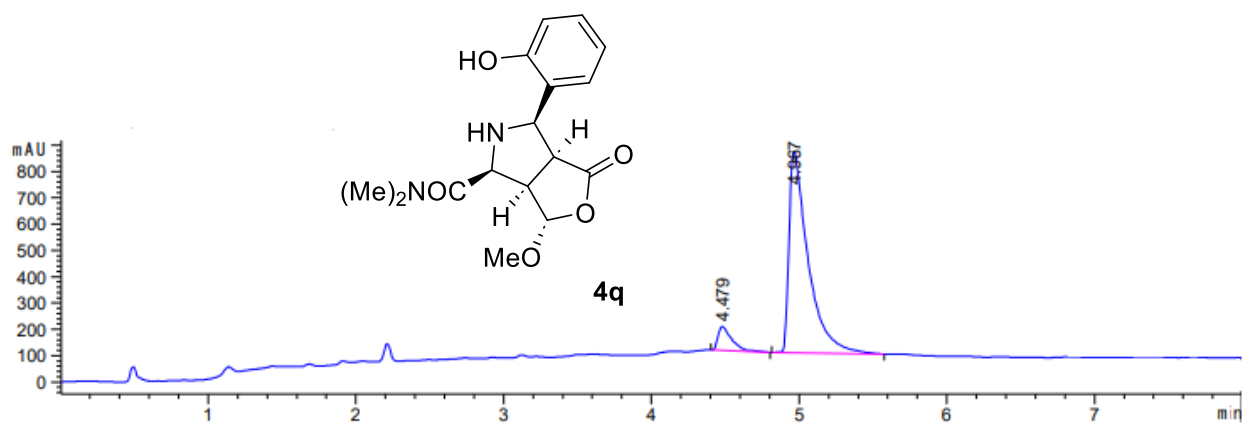

| Peak # | RetTime [min] | Type | Width [min] | Area [mAU*s] | Height [mAU] | Area %  |
|--------|---------------|------|-------------|--------------|--------------|---------|
| 1      | 4.479         | BB   | 0.0934      | 591.62152    | 91.55354     | 7.9405  |
| 2      | 4.967         | BB   | 0.1286      | 6859.05225   | 765.21808    | 92.0595 |

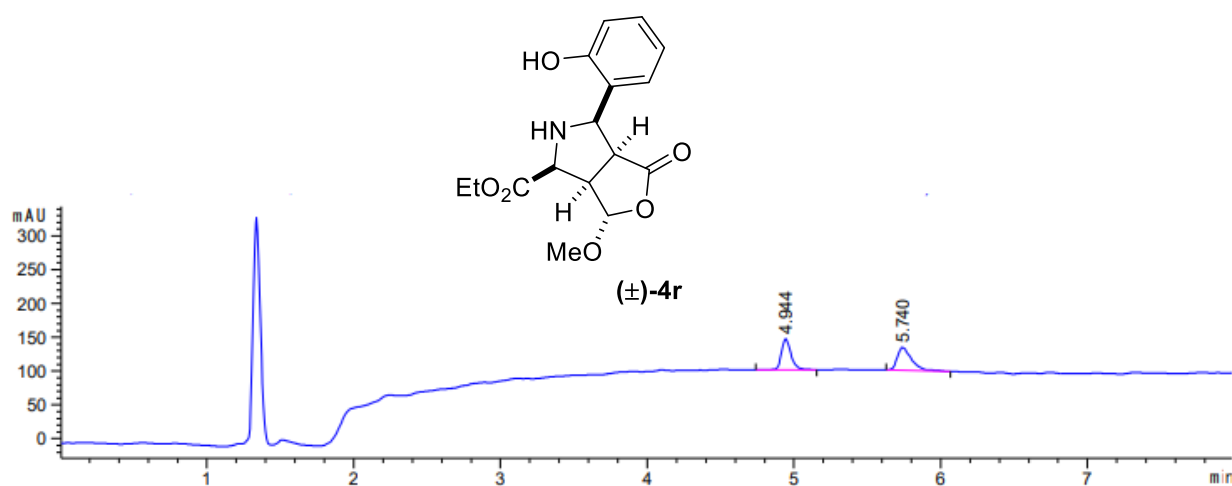

| Peak # | RetTime [min] | Type | Width [min] | Area [mAU*s] | Height [mAU] | Area %  |
|--------|---------------|------|-------------|--------------|--------------|---------|
| 1      | 4.944         | BB   | 0.0697      | 211.99269    | 46.04057     | 47.4768 |
| 2      | 5.740         | BB   | 0.1048      | 234.52547    | 33.85569     | 52.5232 |

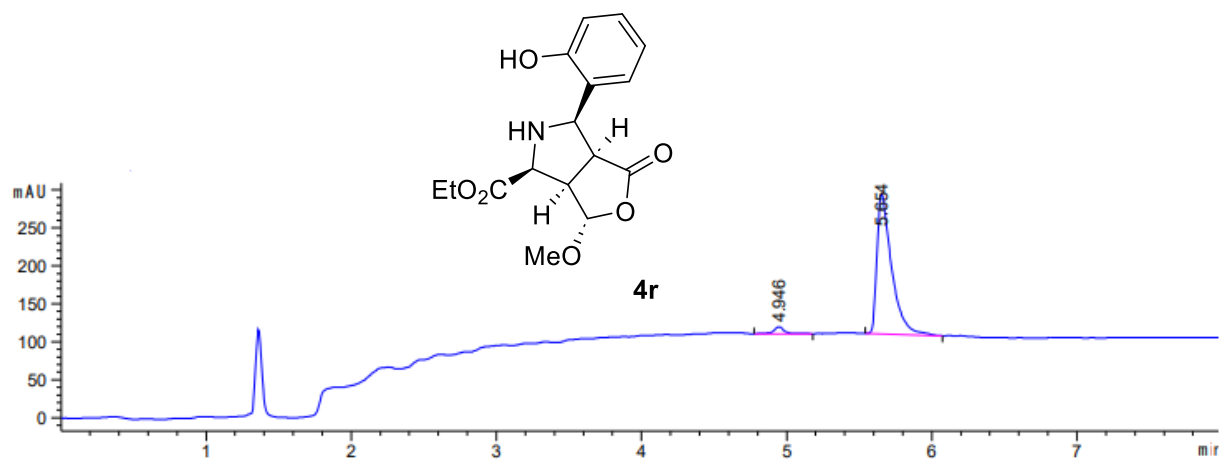

| Peak # | RetTime [min] | Type | Width [min] | Area [mAU*s] | Height [mAU] | Area %  |
|--------|---------------|------|-------------|--------------|--------------|---------|
| 1      | 4.946         | BB   | 0.0715      | 45.18477     | 9.16427      | 3.3754  |
| 2      | 5.654         | BB   | 0.1039      | 1293.47839   | 184.34502    | 96.6246 |

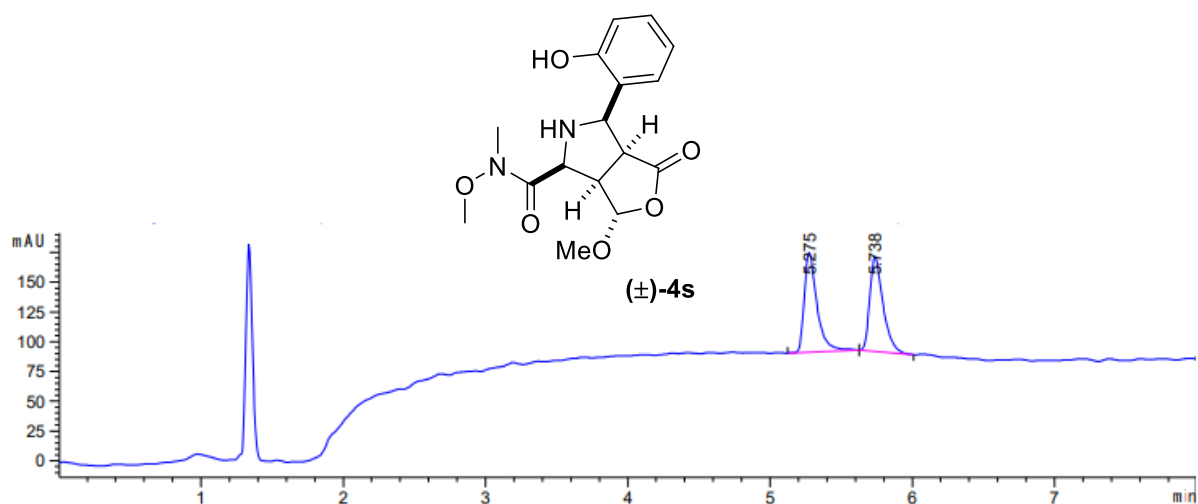

| Peak # | RetTime [min] | Type | Width [min] | Area [mAU*s] | Height [mAU] | Area %  |
|--------|---------------|------|-------------|--------------|--------------|---------|
| 1      | 5.275         | BB   | 0.0930      | 520.97668    | 83.26897     | 50.0646 |
| 2      | 5.738         | BB   | 0.0985      | 519.63190    | 79.24296     | 49.9354 |

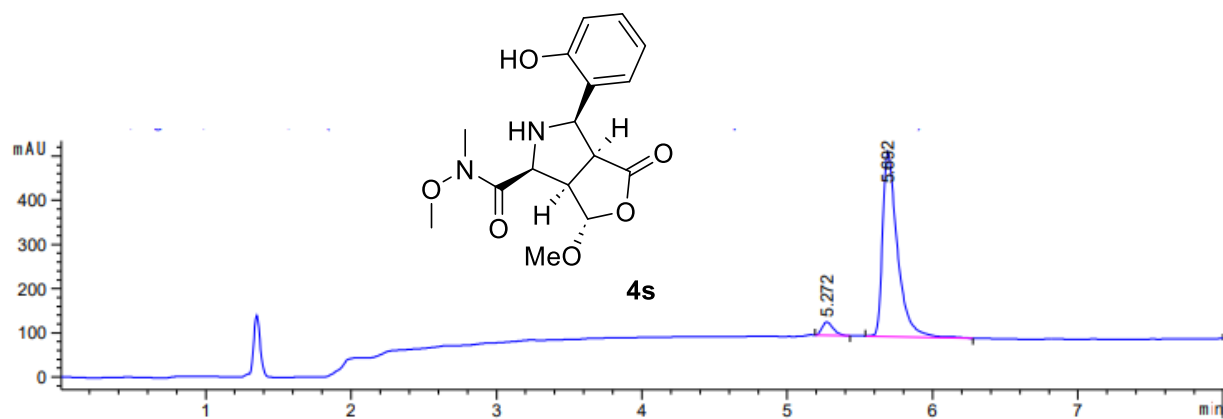

| Peak # | RetTime [min] | Type | Width [min] | Area [mAU*s] | Height [mAU] | Area %  |
|--------|---------------|------|-------------|--------------|--------------|---------|
| 1      | 5.272         | BB   | 0.0841      | 160.96059    | 30.21964     | 5.1420  |
| 2      | 5.692         | BB   | 0.1049      | 2969.34058   | 417.75375    | 94.8580 |

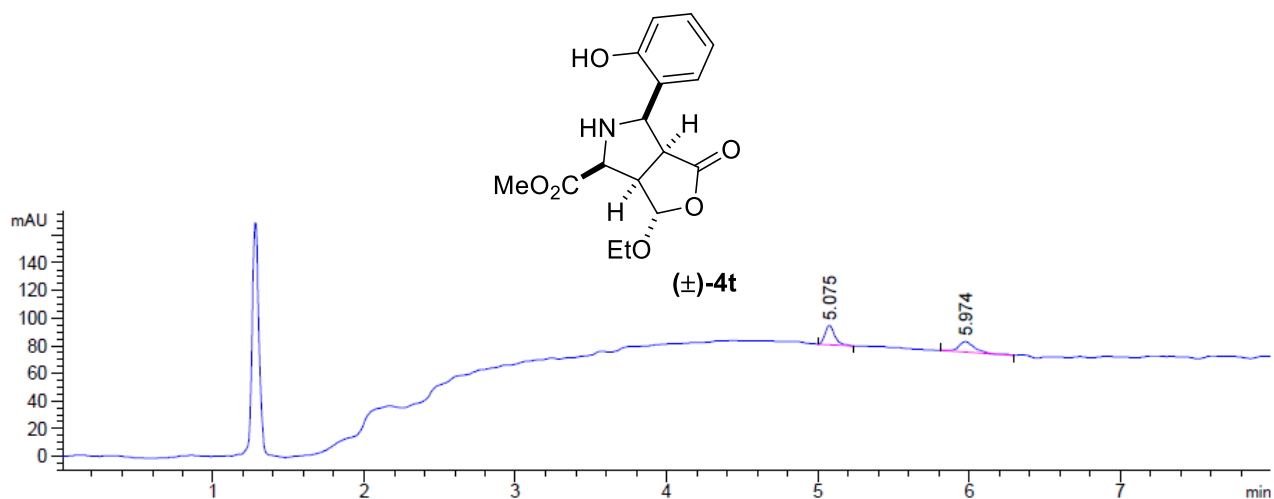

| Peak # | RetTime [min] | Type | Width [min] | Area [mAU*s] | Height [mAU] | Area %  |
|--------|---------------|------|-------------|--------------|--------------|---------|
| 1      | 5.075         | BB   | 0.0677      | 62.63266     | 14.13878     | 52.1870 |
| 2      | 5.974         | BB   | 0.1124      | 57.38316     | 7.57474      | 47.8130 |

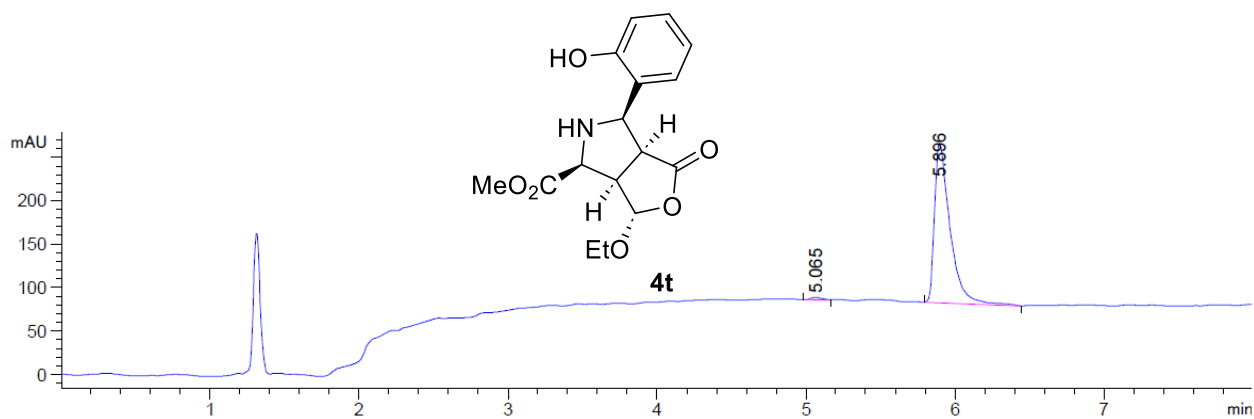

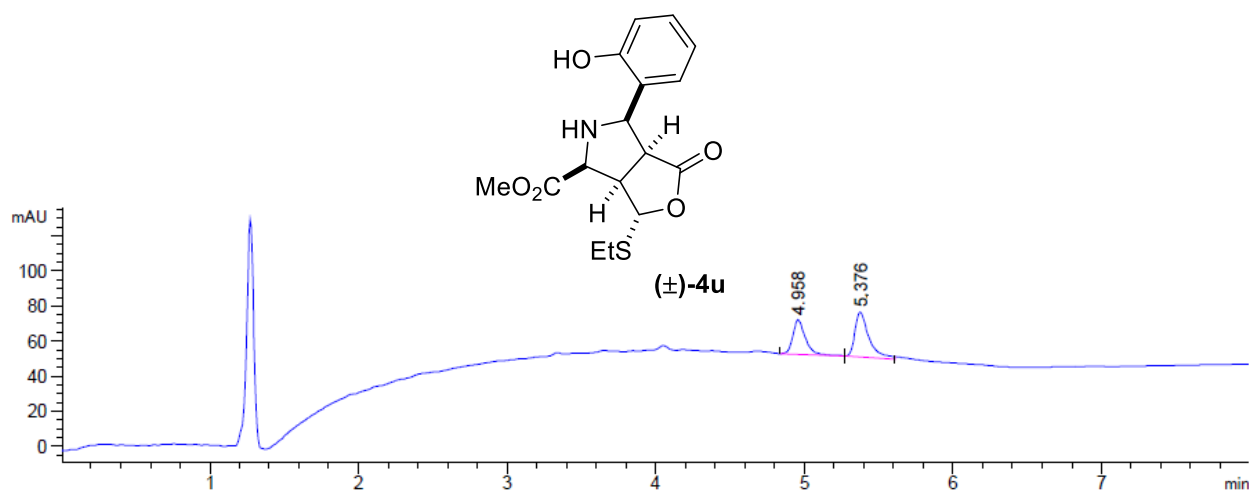

| Peak # | RetTime [min] | Type | Width [min] | Area [mAU*s] | Height [mAU] | Area %  |
|--------|---------------|------|-------------|--------------|--------------|---------|
| 1      | 4.958         | BB   | 0.0856      | 113.61006    | 19.59394     | 40.2134 |
| 2      | 5.376         | BB   | 0.1092      | 168.90775    | 25.78253     | 59.7866 |

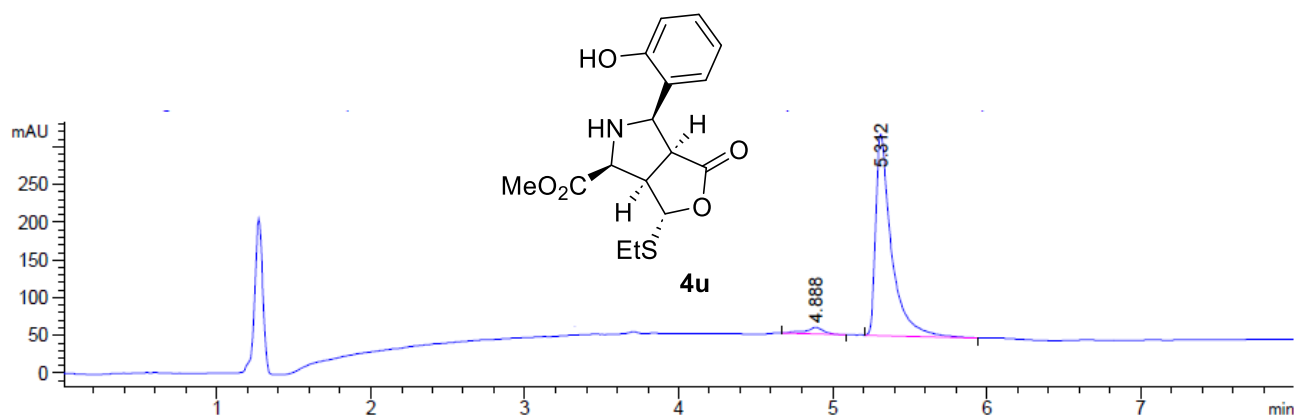

| Peak # | RetTime [min] | Type | Width [min] | Area [mAU*s] | Height [mAU] | Area %  |
|--------|---------------|------|-------------|--------------|--------------|---------|
| 1      | 4.888         | BB   | 0.1200      | 77.11693     | 8.99960      | 3.9214  |
| 2      | 5.312         | BB   | 0.1027      | 1889.43579   | 266.66891    | 96.0786 |

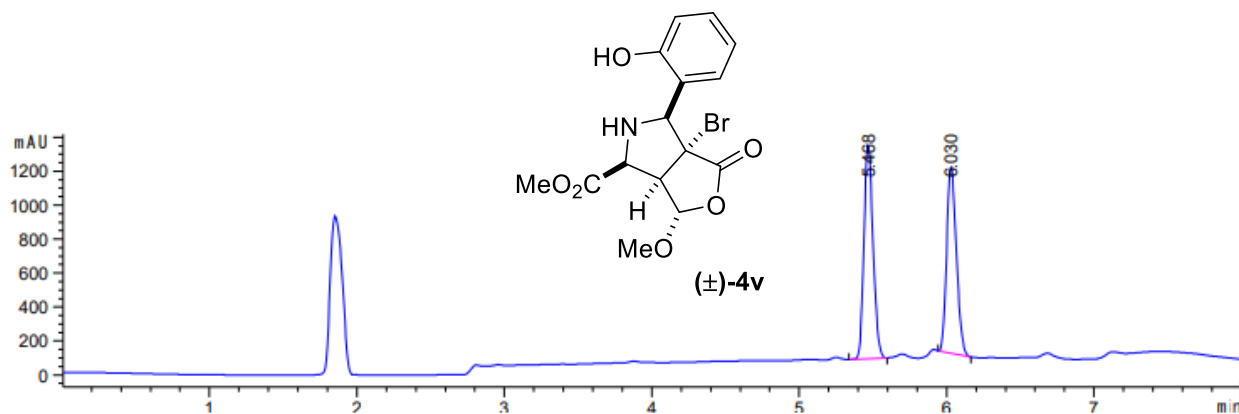

| Peak # | RetTime [min] | Type | Width [min] | Area [mAU*s] | Height [mAU] | Area %  |
|--------|---------------|------|-------------|--------------|--------------|---------|
| 1      | 5.468         | BB   | 0.0661      | 5404.93311   | 1258.92371   | 51.8650 |
| 2      | 6.030         | BB   | 0.0691      | 5016.23047   | 1102.26428   | 48.1350 |

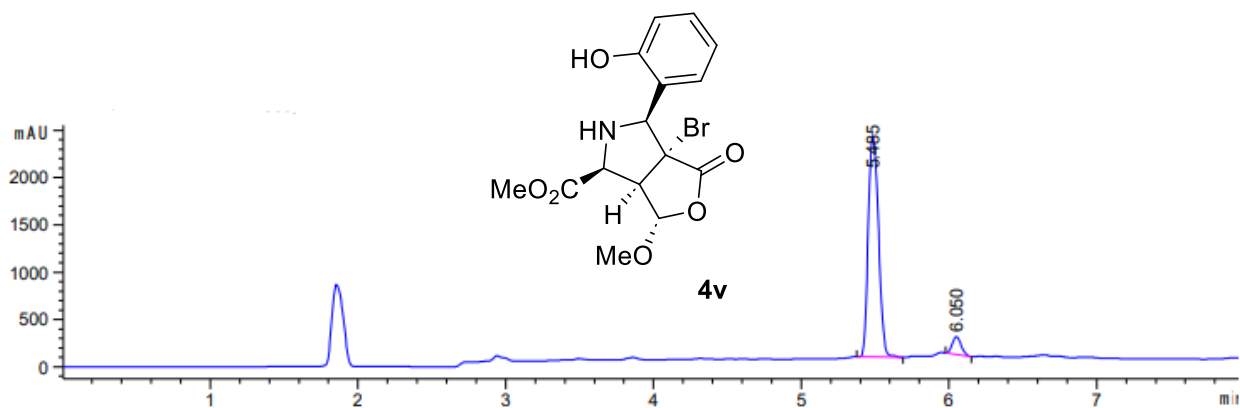

| Peak # | RetTime [min] | Type | Width [min] | Area [mAU*s] | Height [mAU] | Area %  |
|--------|---------------|------|-------------|--------------|--------------|---------|
| 1      | 5.485         | BB   | 0.0782      | 1.12599e4    | 2335.94141   | 93.4759 |
| 2      | 6.050         | BB   | 0.0668      | 785.87988    | 187.83875    | 6.5241  |

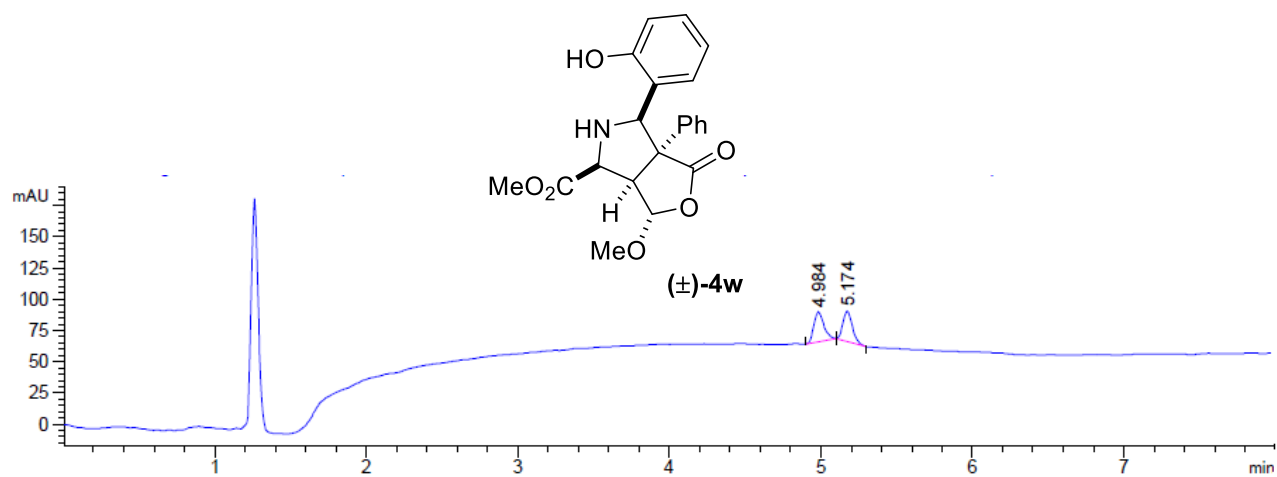

| Peak # | RetTime [min] | Type | Width [min] | Area [mAU*s] | Height [mAU] | Area %  |
|--------|---------------|------|-------------|--------------|--------------|---------|
| 1      | 4.984         | BB   | 0.0694      | 109.85074    | 24.01087     | 51.2326 |
| 2      | 5.174         | BB   | 0.0661      | 104.56509    | 24.33723     | 48.7674 |

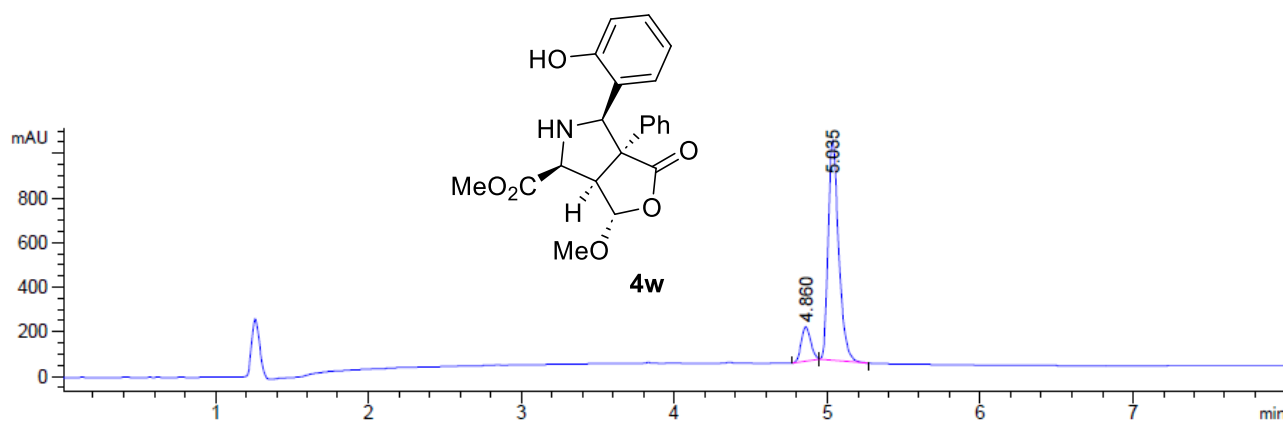

| Peak # | RetTime [min] | Type | Width [min] | Area [mAU*s] | Height [mAU] | Area %  |
|--------|---------------|------|-------------|--------------|--------------|---------|
| 1      | 4.860         | BB   | 0.0658      | 665.49341    | 155.94643    | 12.3854 |
| 2      | 5.035         | BB   | 0.0715      | 4707.72461   | 989.53674    | 87.6146 |

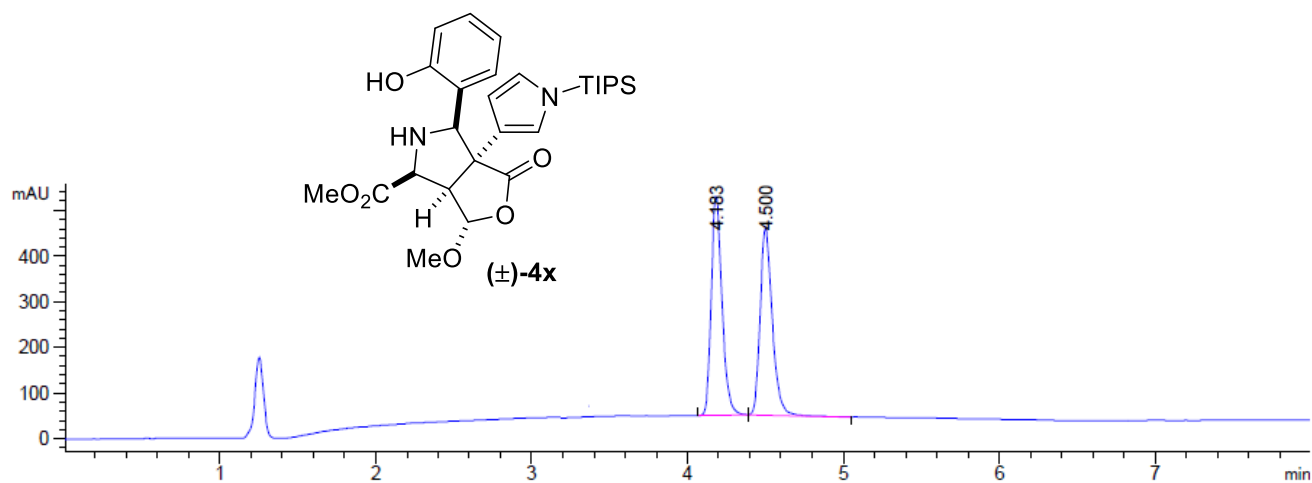

| Peak # | RetTime [min] | Type | Width [min] | Area [mAU*s] | Height [mAU] | Area %  |
|--------|---------------|------|-------------|--------------|--------------|---------|
| 1      | 4.183         | BB   | 0.0741      | 2315.54395   | 481.87674    | 50.9871 |
| 2      | 4.500         | BB   | 0.0814      | 2225.88501   | 409.65826    | 49.0129 |

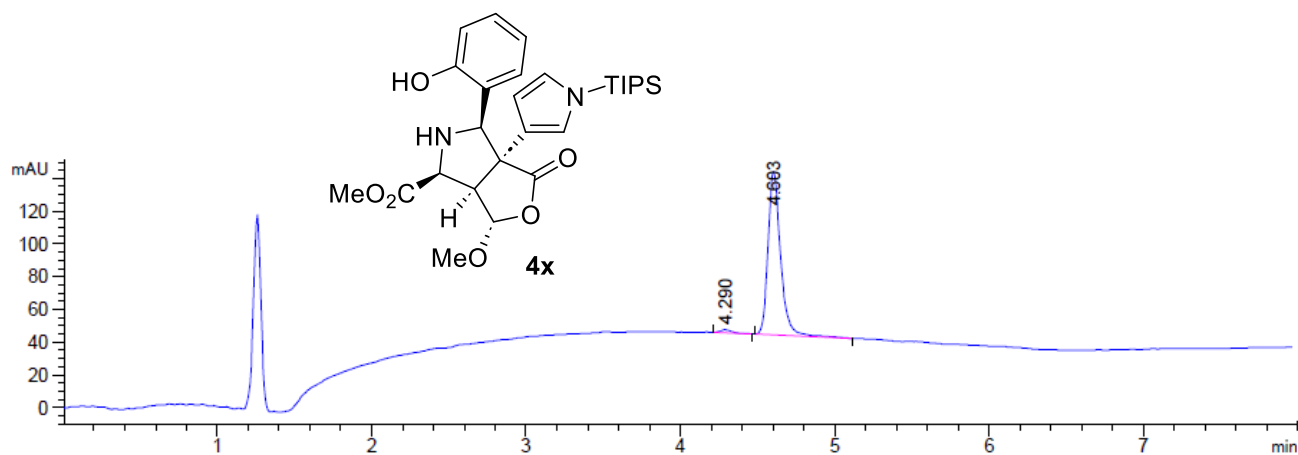

| Peak # | RetTime [min] | Type | Width [min] | Area [mAU*s] | Height [mAU] | Area %  |
|--------|---------------|------|-------------|--------------|--------------|---------|
| 1      | 4.290         | BB   | 0.0728      | 9.98764      | 1.98111      | 1.7476  |
| 2      | 4.603         | BB   | 0.0856      | 561.51184    | 99.82718     | 98.2524 |

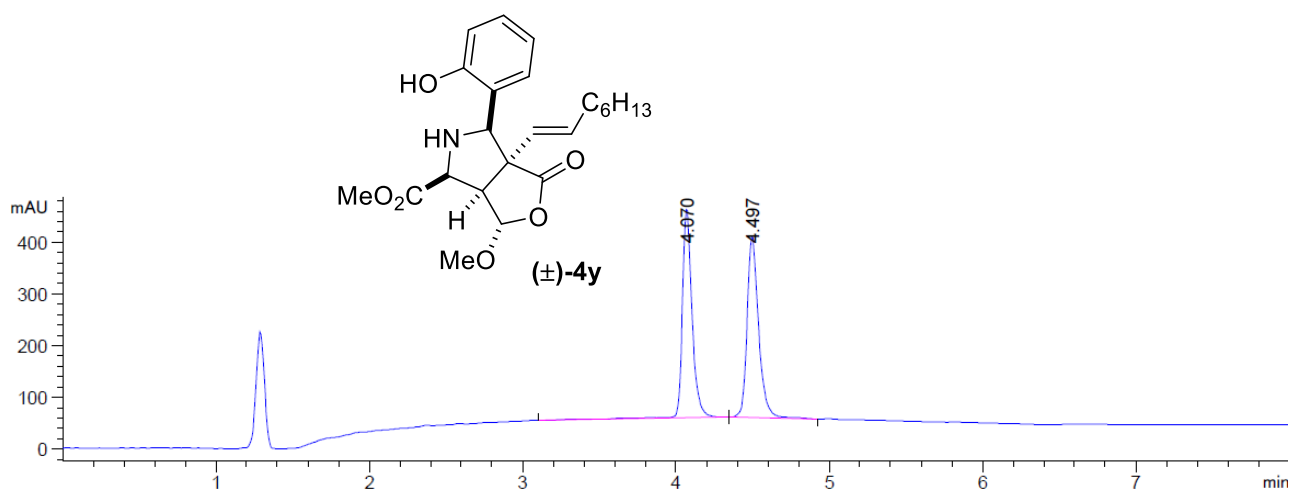

| Peak # | RetTime [min] | Type | Width [min] | Area [mAU*s] | Height [mAU] | Area %  |
|--------|---------------|------|-------------|--------------|--------------|---------|
| 1      | 4.070         | BB   | 0.0659      | 1805.53894   | 405.62766    | 49.6948 |
| 2      | 4.497         | BB   | 0.0787      | 1827.71887   | 351.26193    | 50.3052 |

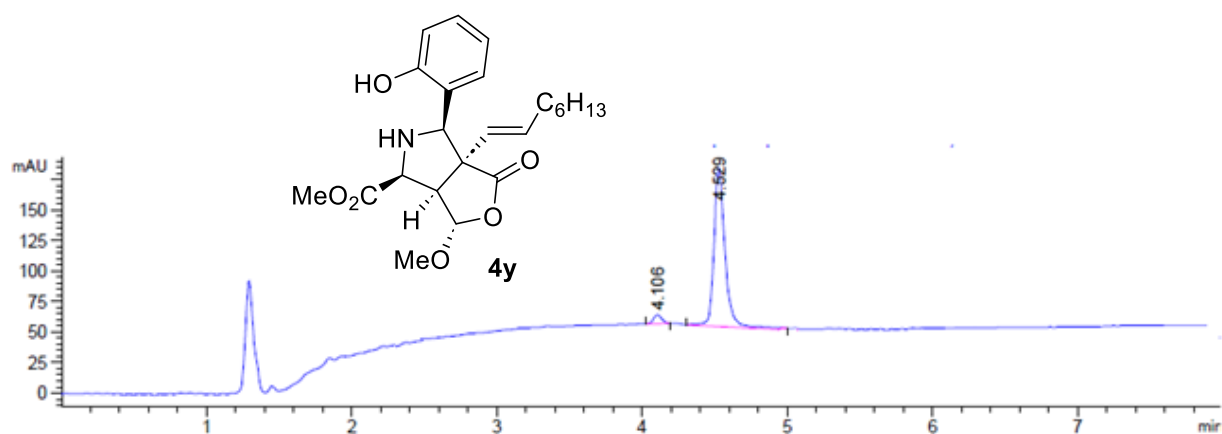

| Peak # | RetTime [min] | Type | Width [min] | Area [mAU*s] | Height [mAU] | Area %  |
|--------|---------------|------|-------------|--------------|--------------|---------|
| 1      | 4.106         | BB   | 0.0614      | 28.28265     | 7.27486      | 3.5926  |
| 2      | 4.529         | BB   | 0.0865      | 758.96509    | 129.27345    | 96.4074 |

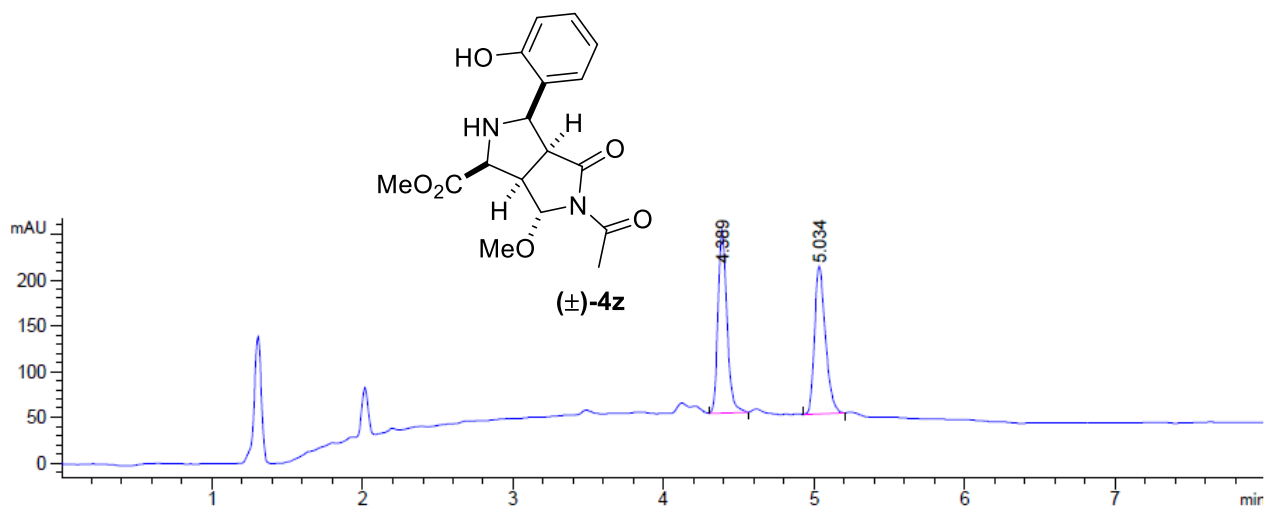

| Peak # | RetTime [min] | Type | Width [min] | Area [mAU*s] | Height [mAU] | Area %  |
|--------|---------------|------|-------------|--------------|--------------|---------|
| 1      | 4.389         | BB   | 0.0621      | 823.09399    | 199.70868    | 50.4694 |
| 2      | 5.034         | BB   | 0.0765      | 807.78320    | 161.15132    | 49.5306 |

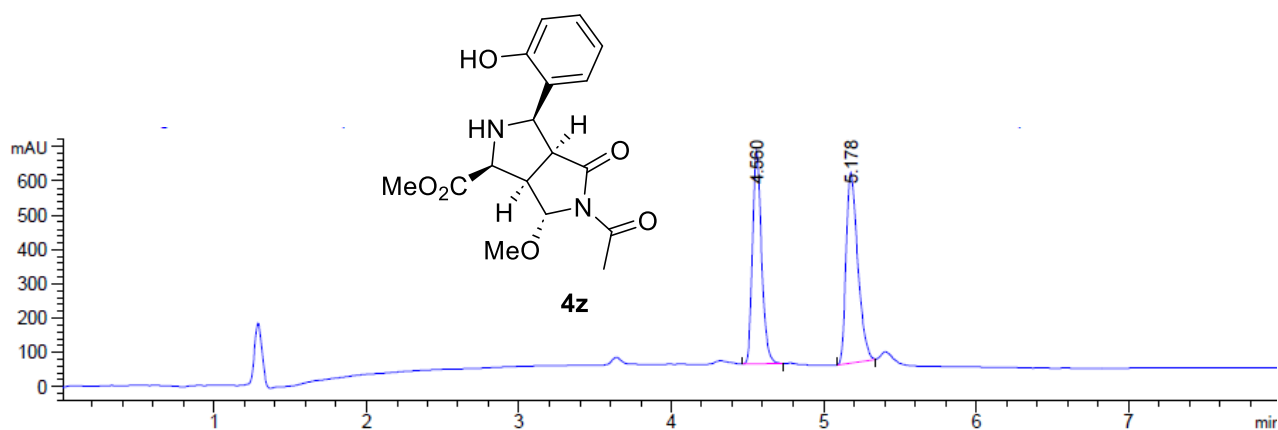

| Peak # | RetTime [min] | Type | Width [min] | Area [mAU*s] | Height [mAU] | Area %  |
|--------|---------------|------|-------------|--------------|--------------|---------|
| 1      | 4.560         | BB   | 0.0643      | 2576.74170   | 622.49231    | 46.6716 |
| 2      | 5.178         | BB   | 0.0817      | 2944.26538   | 556.41541    | 53.3284 |

## SFC-HPLC traces of furanones 2

KR of (±)-2a from 4b:

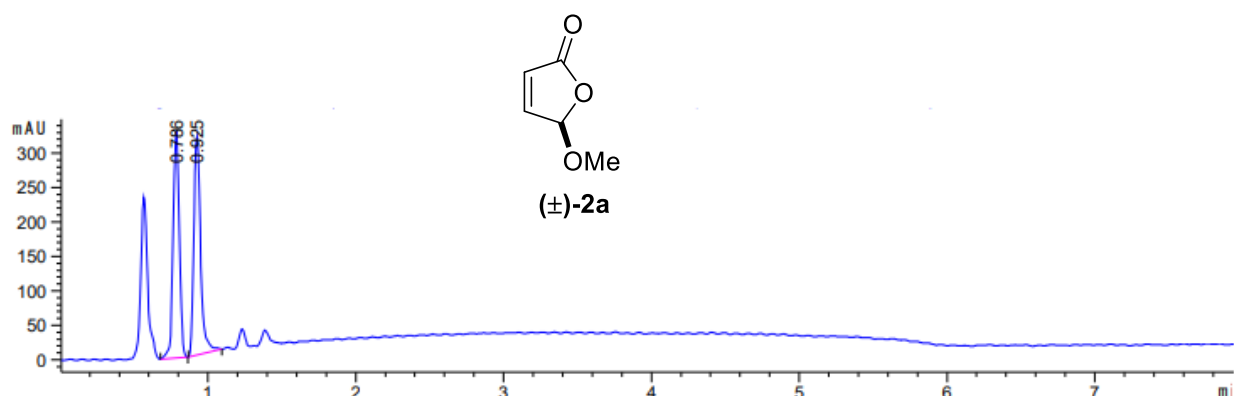

| Peak # | RetTime [min] | Type | Width [min] | Area [mAU*s] | Height [mAU] | Area %  |
|--------|---------------|------|-------------|--------------|--------------|---------|
| 1      | 0.786         | BB   | 0.0465      | 975.98798    | 330.43430    | 48.9923 |
| 2      | 0.925         | BB   | 0.0493      | 1016.13629   | 317.94958    | 51.0077 |

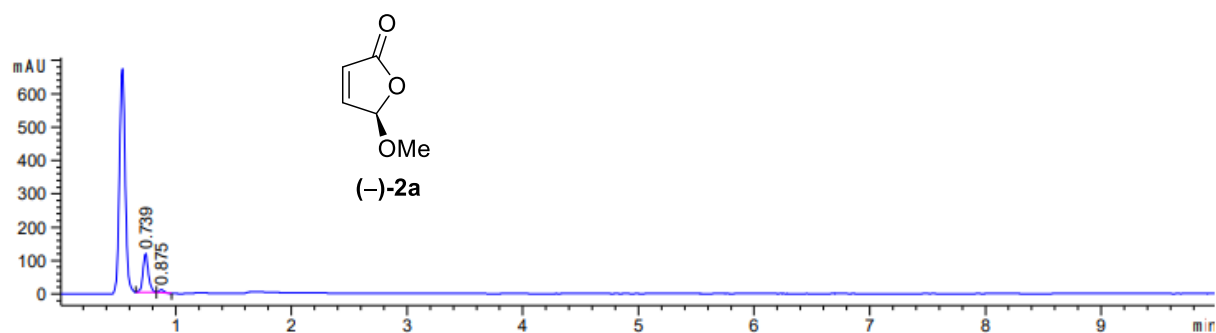

| Peak # | RetTime [min] | Type | Width [min] | Area [mAU*s] | Height [mAU] | Area %  |
|--------|---------------|------|-------------|--------------|--------------|---------|
| 1      | 0.739         | BB   | 0.0507      | 385.51190    | 116.33720    | 93.5051 |
| 2      | 0.875         | BB   | 0.0471      | 26.77774     | 8.90522      | 6.4949  |

KR of (±)-2a from 4b (1 mmol scale):

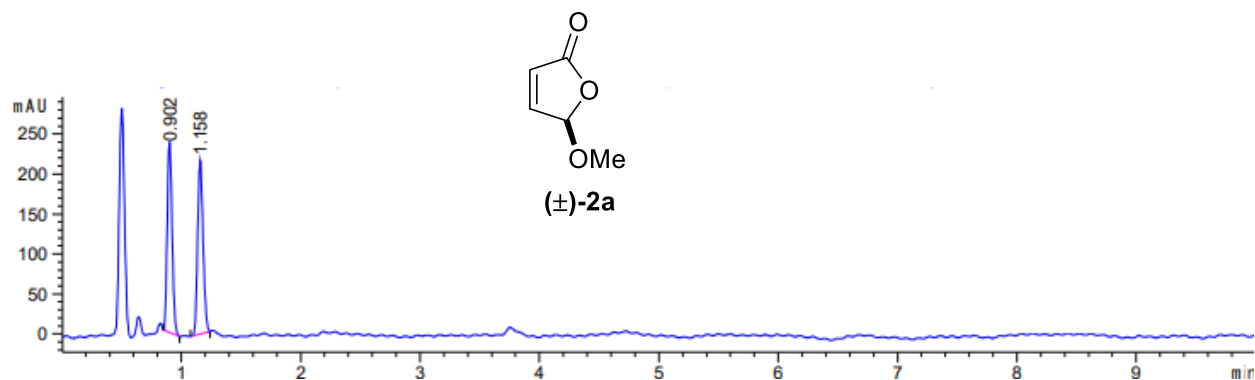

| Peak # | RetTime [min] | Type | Width [min] | Area [mAU*s] | Height [mAU] | Area %  |
|--------|---------------|------|-------------|--------------|--------------|---------|
| 1      | 0.902         | BB   | 0.0456      | 686.66113    | 238.61217    | 49.6206 |
| 2      | 1.158         | BB   | 0.0513      | 697.16071    | 217.87157    | 50.3794 |

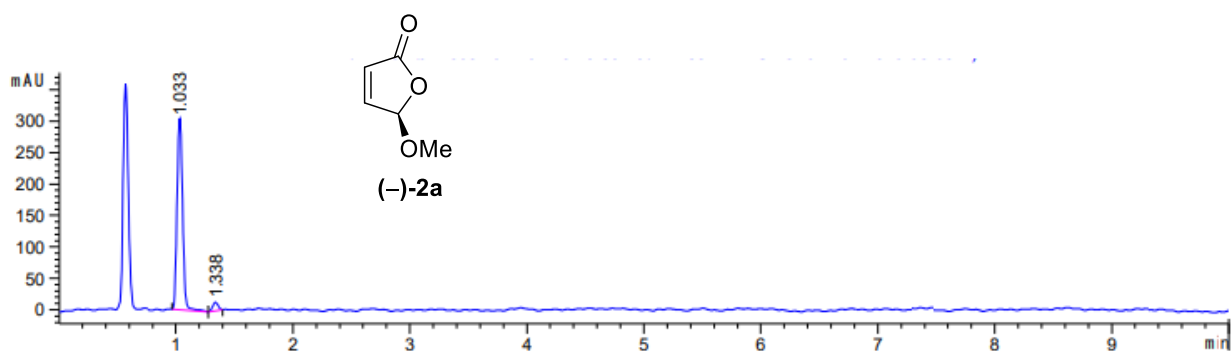

| Peak # | RetTime [min] | Type | Width [min] | Area [mAU*s] | Height [mAU] | Area %  |
|--------|---------------|------|-------------|--------------|--------------|---------|
| 1      | 1.033         | BB   | 0.0501      | 1004.47046   | 307.56244    | 95.8483 |
| 2      | 1.338         | BB   | 0.0515      | 43.50930     | 13.53376     | 4.1517  |

KR of (±)-2a from 4c:

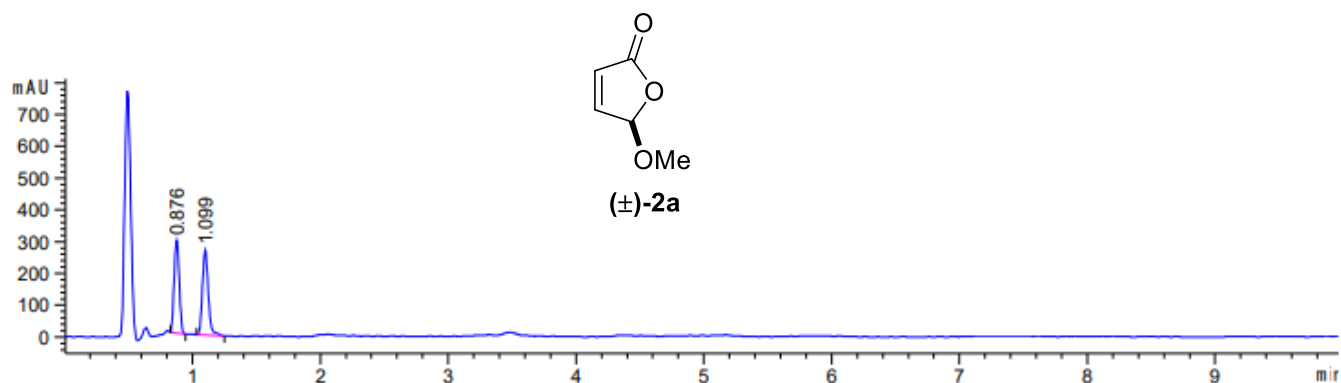

| Peak # | RetTime [min] | Type | Width [min] | Area [mAU*s] | Height [mAU] | Area %  |
|--------|---------------|------|-------------|--------------|--------------|---------|
| 1      | 0.876         | BB   | 0.0442      | 802.69983    | 290.89655    | 48.1116 |
| 2      | 1.099         | BB   | 0.0518      | 865.71332    | 267.45956    | 51.8884 |

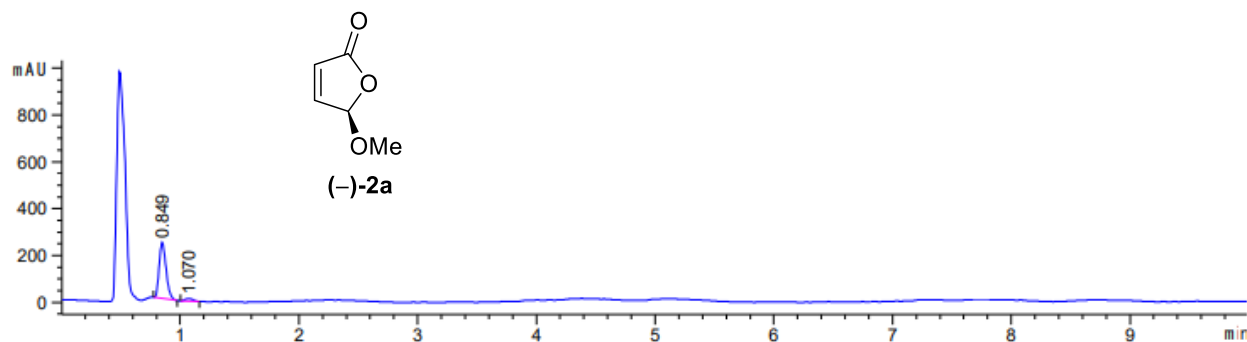

| Peak # | RetTime [min] | Type | Width [min] | Area [mAU*s] | Height [mAU] | Area %  |
|--------|---------------|------|-------------|--------------|--------------|---------|
| 1      | 0.849         | BB   | 0.0607      | 951.13434    | 237.43390    | 94.9491 |
| 2      | 1.070         | BB   | 0.0748      | 50.59630     | 11.18018     | 5.0509  |

KR of (±)-2a from 4d:

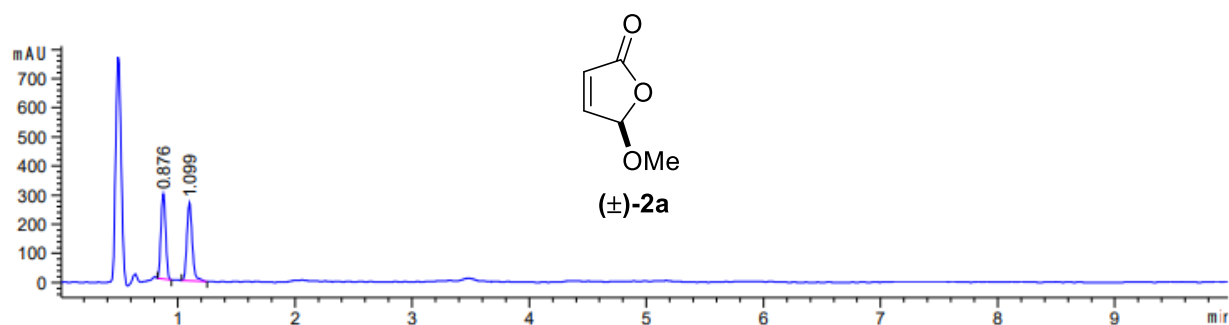

| Peak # | RetTime [min] | Type | Width [min] | Area [mAU*s] | Height [mAU] | Area %  |
|--------|---------------|------|-------------|--------------|--------------|---------|
| 1      | 0.876         | BB   | 0.0442      | 802.69983    | 290.89655    | 48.1116 |
| 2      | 1.099         | BB   | 0.0518      | 865.71332    | 267.45956    | 51.8884 |

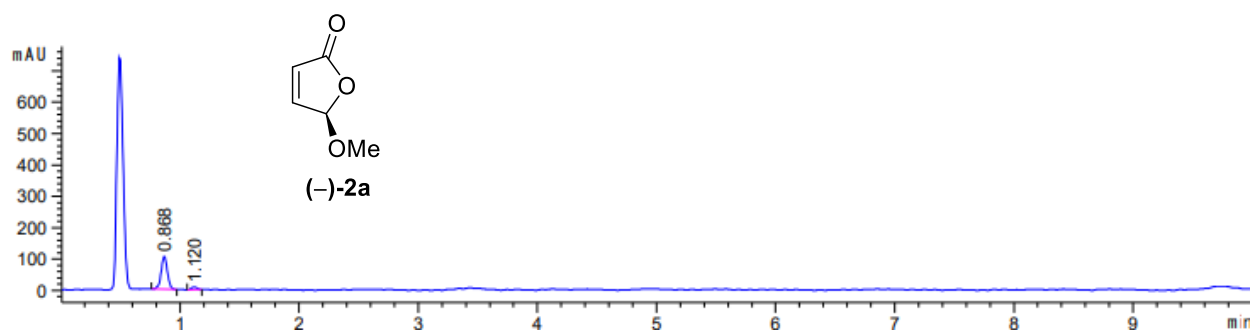

| Peak # | RetTime [min] | Type | Width [min] | Area [mAU*s] | Height [mAU] | Area %  |
|--------|---------------|------|-------------|--------------|--------------|---------|
| 1      | 0.868         | BB   | 0.0563      | 380.21069    | 104.90929    | 93.0019 |
| 2      | 1.120         | BB   | 0.0522      | 28.60955     | 8.73301      | 6.9981  |

KR of (±)-2a from 4e:

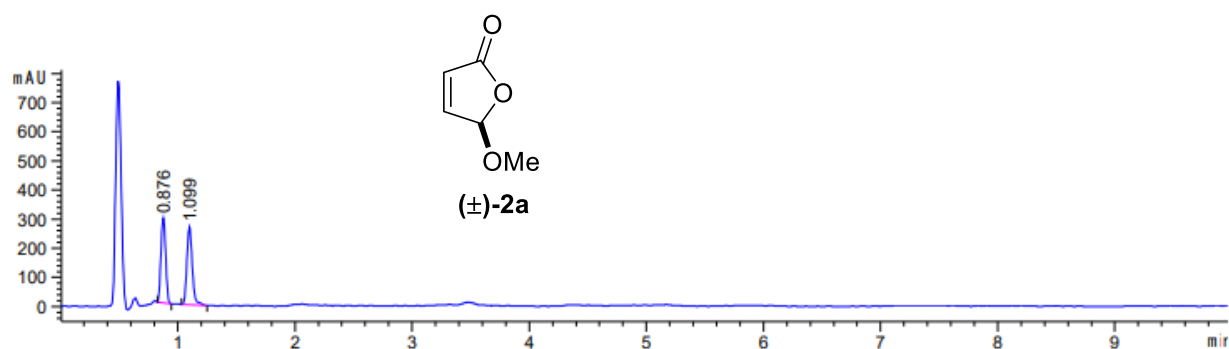

| Peak # | RetTime [min] | Type | Width [min] | Area [mAU*s] | Height [mAU] | Area %  |
|--------|---------------|------|-------------|--------------|--------------|---------|
| 1      | 0.876         | BB   | 0.0442      | 802.69983    | 290.89655    | 48.1116 |
| 2      | 1.099         | BB   | 0.0518      | 865.71332    | 267.45956    | 51.8884 |

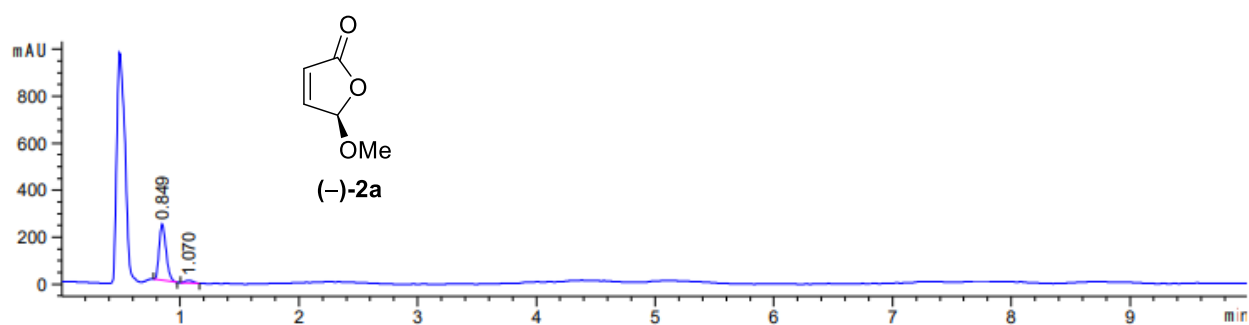

| Peak # | RetTime [min] | Type | Width [min] | Area [mAU*s] | Height [mAU] | Area %  |
|--------|---------------|------|-------------|--------------|--------------|---------|
| 1      | 0.849         | BB   | 0.0607      | 951.13434    | 237.43390    | 94.9914 |
| 2      | 1.070         | BB   | 0.0748      | 50.59630     | 11.18018     | 5.0905  |

KR of (±)-2a from 4f:

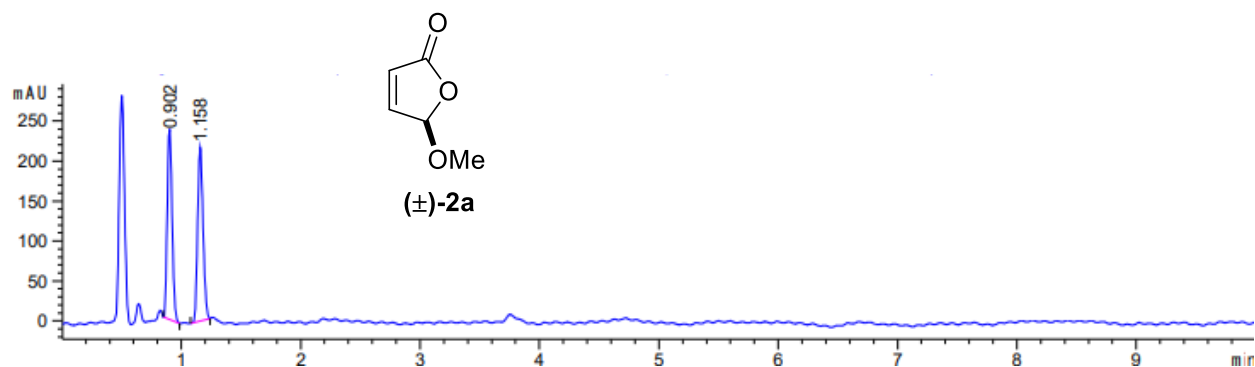

| Peak # | RetTime [min] | Type | Width [min] | Area [mAU*s] | Height [mAU] | Area %  |
|--------|---------------|------|-------------|--------------|--------------|---------|
| 1      | 0.902         | BB   | 0.0456      | 686.66113    | 238.61217    | 49.6206 |
| 2      | 1.158         | BB   | 0.0513      | 697.16071    | 217.87157    | 50.3794 |

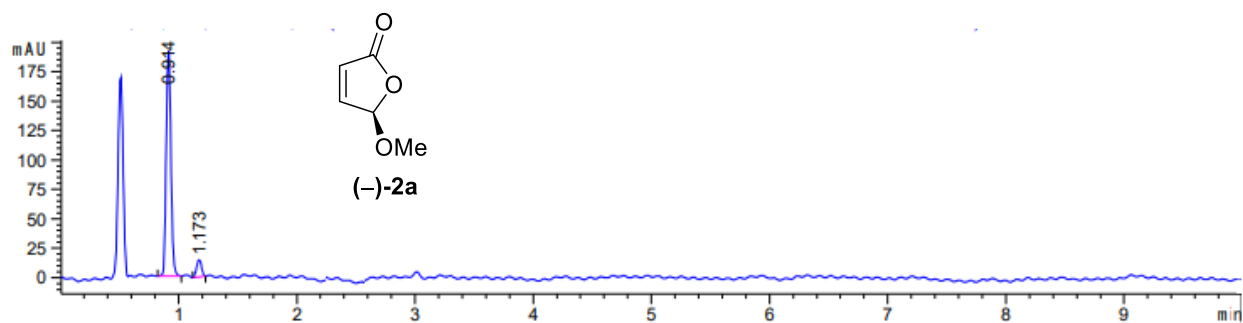

| Peak # | RetTime [min] | Type | Width [min] | Area [mAU*s] | Height [mAU] | Area %  |
|--------|---------------|------|-------------|--------------|--------------|---------|
| 1      | 0.914         | BB   | 0.0452      | 549.60352    | 193.32474    | 92.8349 |
| 2      | 1.173         | BB   | 0.0480      | 42.41911     | 14.56366     | 7.1651  |

KR of (±)-2a from 4g:

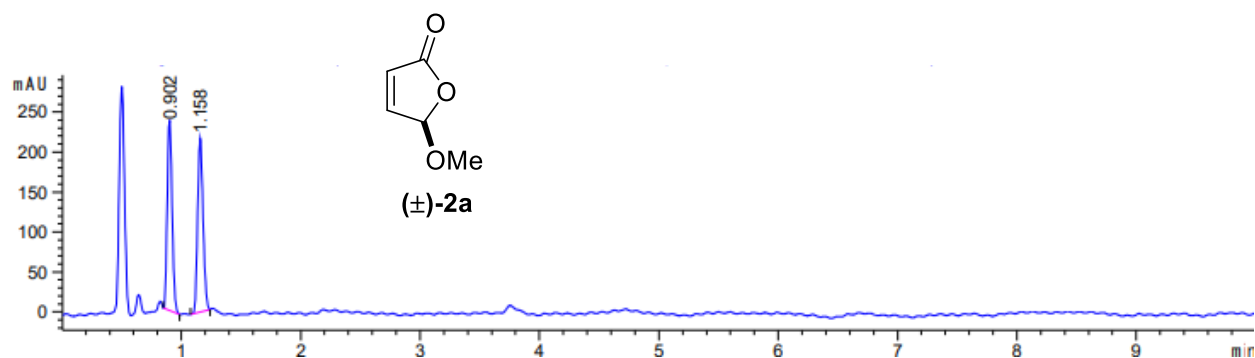

| Peak # | RetTime [min] | Type | Width [min] | Area [mAU*s] | Height [mAU] | Area %  |
|--------|---------------|------|-------------|--------------|--------------|---------|
| 1      | 0.902         | BB   | 0.0456      | 686.66113    | 238.61217    | 49.6206 |
| 2      | 1.158         | BB   | 0.0513      | 697.16071    | 217.87157    | 50.3794 |

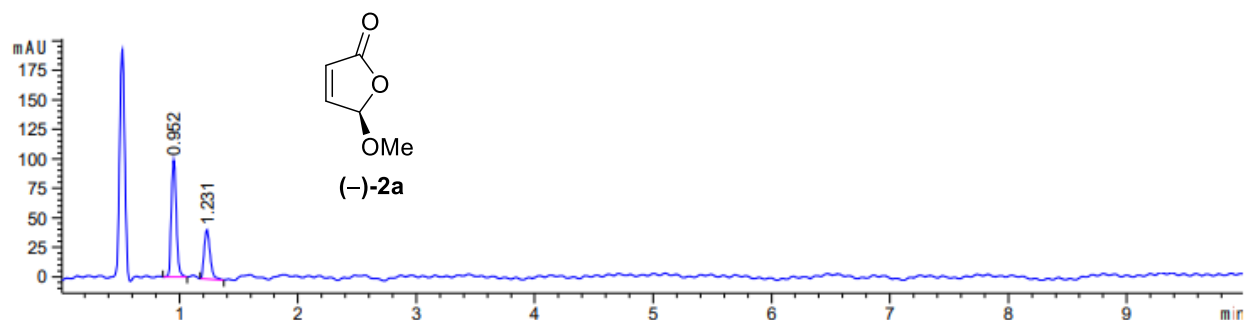

| Peak # | RetTime [min] | Type | Width [min] | Area [mAU*s] | Height [mAU] | Area %  |
|--------|---------------|------|-------------|--------------|--------------|---------|
| 1      | 0.952         | BB   | 0.0459      | 286.39941    | 98.52403     | 66.7238 |
| 2      | 1.231         | BB   | 0.0541      | 142.83189    | 41.56909     | 33.2762 |

KR of (±)-2a from 4h:

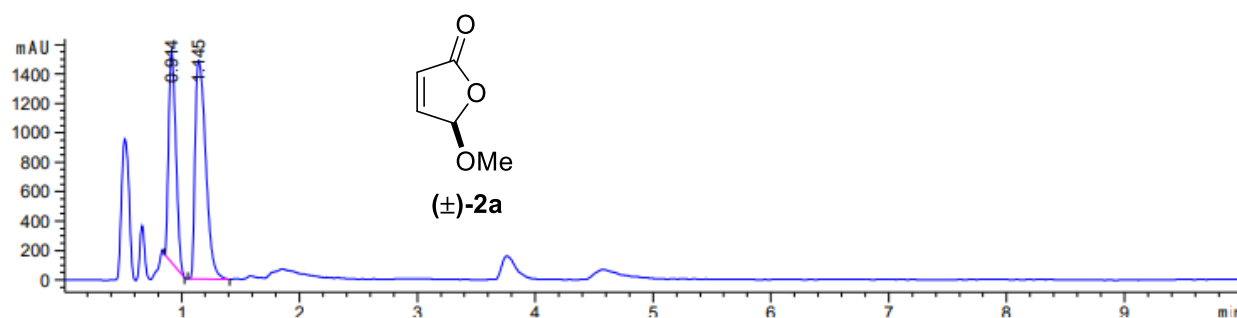

| Peak # | RetTime [min] | Type | Width [min] | Area [mAU*s] | Height [mAU] | Area %  |
|--------|---------------|------|-------------|--------------|--------------|---------|
| 1      | 0.914         | BB   | 0.0678      | 6159.93701   | 1442.85791   | 39.8519 |
| 2      | 1.145         | BB   | 0.1010      | 9297.12012   | 1486.59631   | 60.1481 |

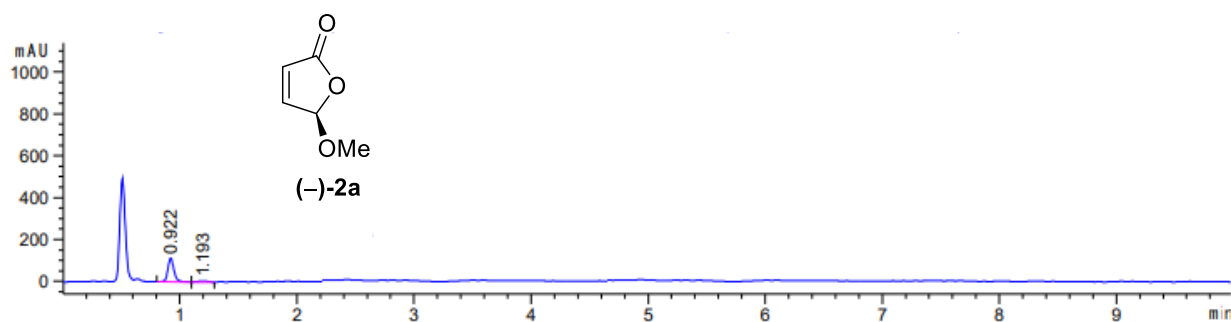

| Peak # | RetTime [min] | Type | Width [min] | Area [mAU*s] | Height [mAU] | Area %  |
|--------|---------------|------|-------------|--------------|--------------|---------|
| 1      | 0.922         | BB   | 0.0562      | 413.89417    | 114.37387    | 93.7149 |
| 2      | 1.193         | BB   | 0.1021      | 27.75824     | 4.61842      | 6.2851  |

KR of (±)-2a from 4i:

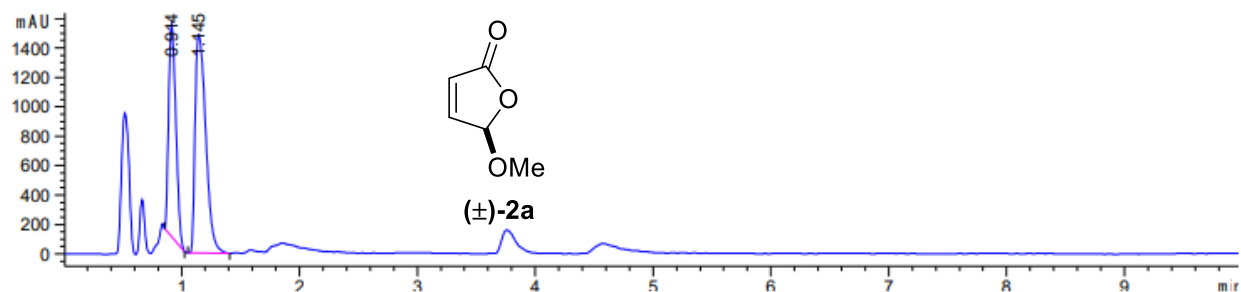

| Peak # | RetTime [min] | Type | Width [min] | Area [mAU*s] | Height [mAU] | Area %  |
|--------|---------------|------|-------------|--------------|--------------|---------|
| 1      | 0.914         | BB   | 0.0678      | 6159.93701   | 1442.85791   | 39.8519 |
| 2      | 1.145         | BB   | 0.1010      | 9297.12012   | 1486.59631   | 60.1481 |

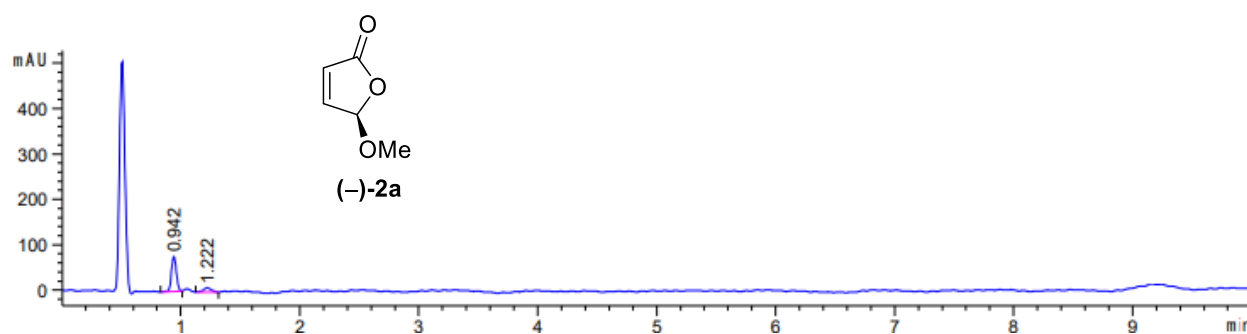

| Peak # | RetTime [min] | Type | Width [min] | Area [mAU*s] | Height [mAU] | Area %  |
|--------|---------------|------|-------------|--------------|--------------|---------|
| 1      | 0.942         | BB   | 0.0460      | 221.66977    | 76.03344     | 84.1746 |
| 2      | 1.222         | BB   | 0.0639      | 41.67549     | 9.74634      | 15.8254 |

KR of (±)-2a from 4j:

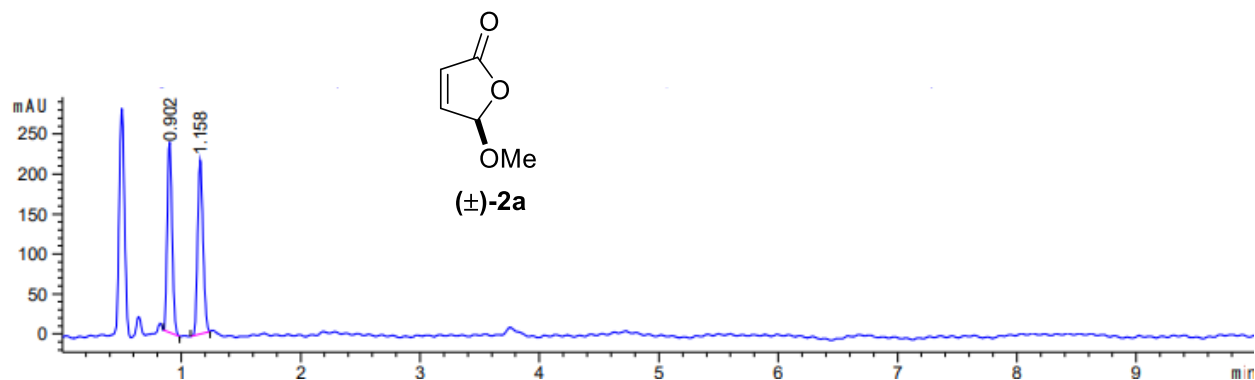

| Peak # | RetTime [min] | Type | Width [min] | Area [mAU*s] | Height [mAU] | Area %  |
|--------|---------------|------|-------------|--------------|--------------|---------|
| 1      | 0.902         | BB   | 0.0456      | 686.66113    | 238.61217    | 49.6206 |
| 2      | 1.158         | BB   | 0.0513      | 697.16071    | 217.87157    | 50.3794 |

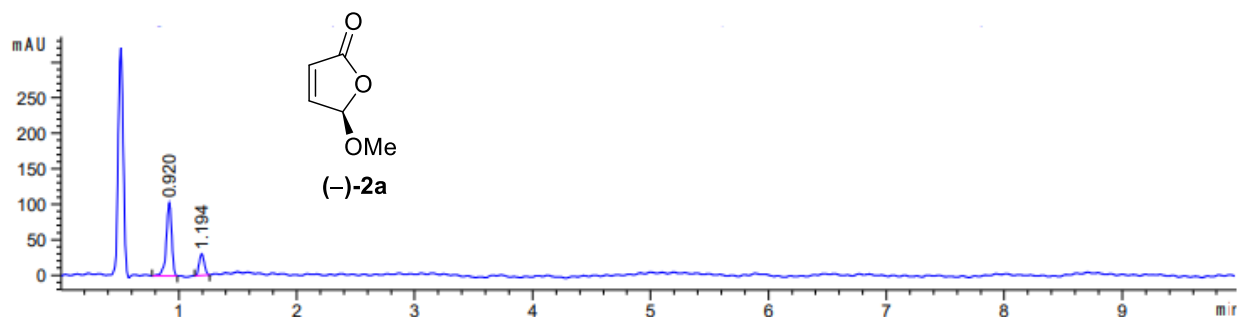

| Peak # | RetTime [min] | Type | Width [min] | Area [mAU*s] | Height [mAU] | Area %  |
|--------|---------------|------|-------------|--------------|--------------|---------|
| 1      | 0.920         | BB   | 0.0492      | 326.87854    | 102.56619    | 78.0594 |
| 2      | 1.194         | BB   | 0.0492      | 91.87760     | 30.46241     | 21.9406 |

KR of (±)-2a from 4k:

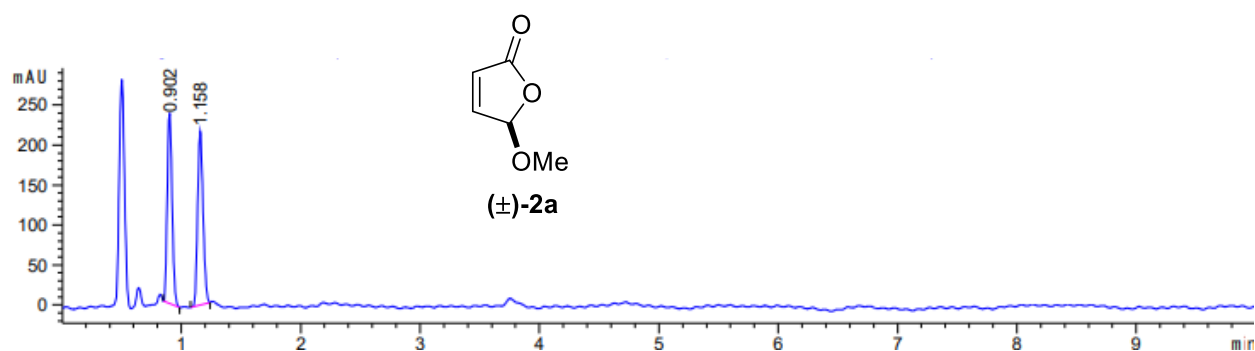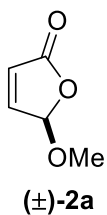

| Peak # | RetTime [min] | Type | Width [min] | Area [mAU*s] | Height [mAU] | Area %  |
|--------|---------------|------|-------------|--------------|--------------|---------|
| 1      | 0.902         | BB   | 0.0456      | 686.66113    | 238.61217    | 49.6206 |
| 2      | 1.158         | BB   | 0.0513      | 697.16071    | 217.87157    | 50.3794 |

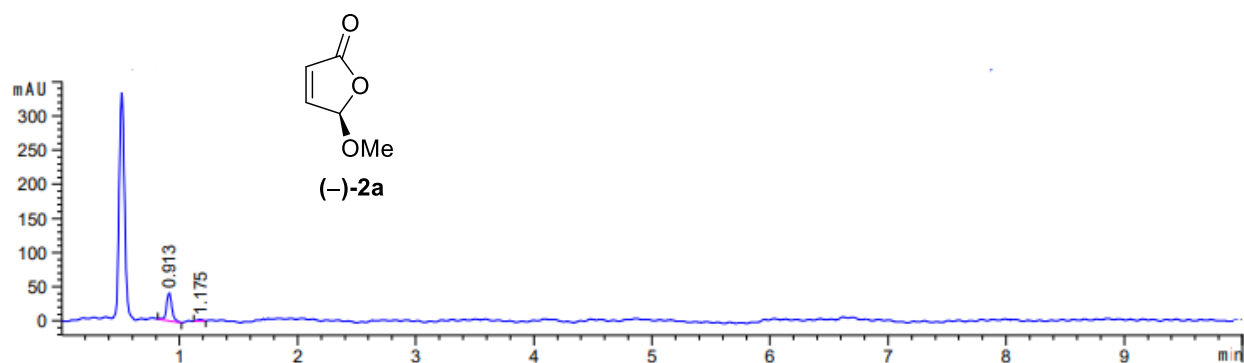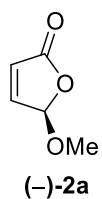

| Peak # | RetTime [min] | Type | Width [min] | Area [mAU*s] | Height [mAU] | Area %  |
|--------|---------------|------|-------------|--------------|--------------|---------|
| 1      | 0.913         | BB   | 0.0479      | 125.20678    | 40.65174     | 95.0815 |
| 2      | 1.175         | BB   | 0.0486      | 6.47682      | 2.18638      | 4.9185  |

KR of (±)-2a from 4I:

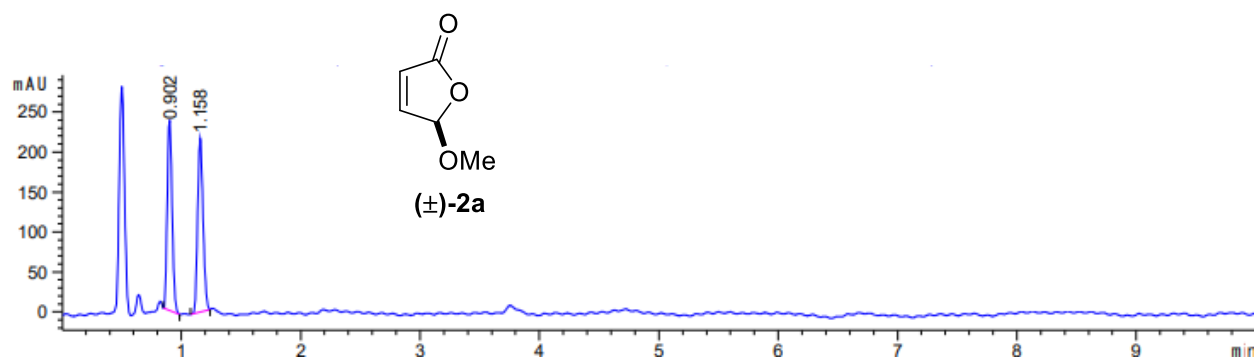

| Peak # | RetTime [min] | Type | Width [min] | Area [mAU*s] | Height [mAU] | Area %  |
|--------|---------------|------|-------------|--------------|--------------|---------|
| 1      | 0.902         | BB   | 0.0456      | 686.66113    | 238.61217    | 49.6206 |
| 2      | 1.158         | BB   | 0.0513      | 697.16071    | 217.87157    | 50.3794 |

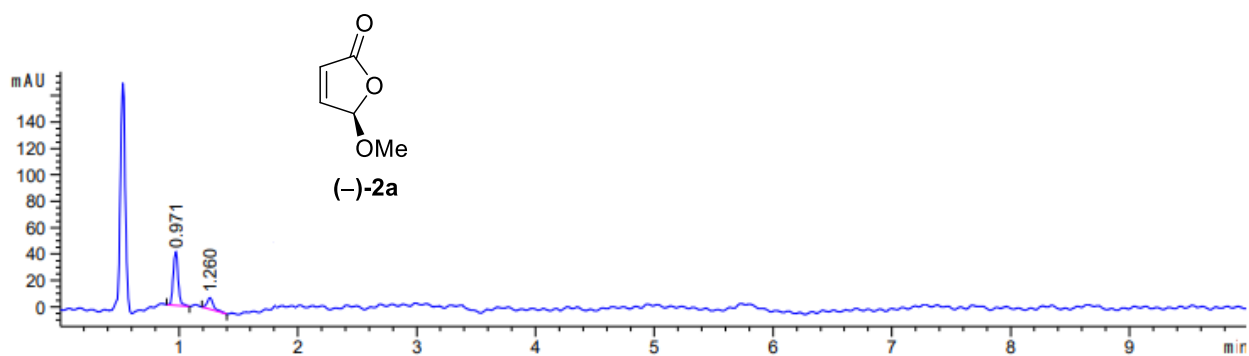

| Peak # | RetTime [min] | Type | Width [min] | Area [mAU*s] | Height [mAU] | Area %  |
|--------|---------------|------|-------------|--------------|--------------|---------|
| 1      | 0.971         | BB   | 0.0460      | 117.79128    | 40.39176     | 78.0859 |
| 2      | 1.260         | BB   | 0.0588      | 33.05712     | 8.61233      | 21.9141 |

KR of (±)-2a from 4m:

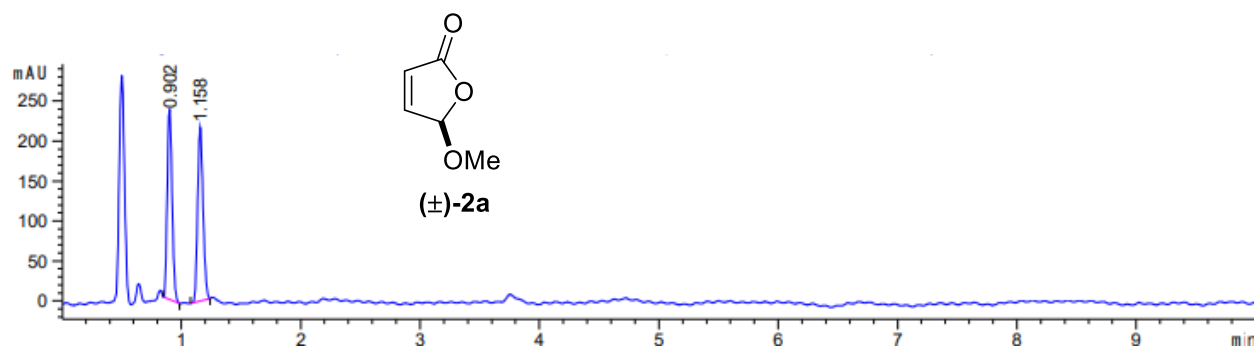

| Peak # | RetTime [min] | Type | Width [min] | Area [mAU*s] | Height [mAU] | Area %  |
|--------|---------------|------|-------------|--------------|--------------|---------|
| 1      | 0.902         | BB   | 0.0456      | 686.66113    | 238.61217    | 49.6206 |
| 2      | 1.158         | BB   | 0.0513      | 697.16071    | 217.87157    | 50.3794 |

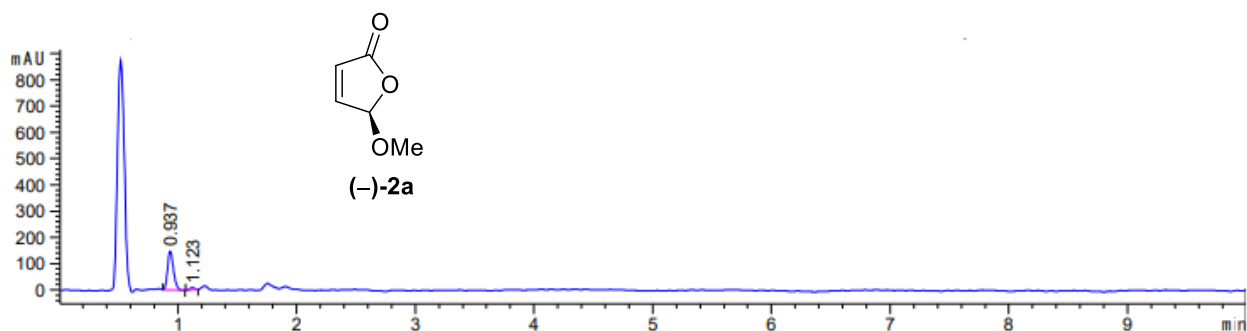

| Peak # | RetTime [min] | Type | Width [min] | Area [mAU*s] | Height [mAU] | Area %  |
|--------|---------------|------|-------------|--------------|--------------|---------|
| 1      | 0.937         | BB   | 0.0542      | 508.62329    | 147.58200    | 95.4553 |
| 2      | 1.123         | BB   | 0.0497      | 24.21592     | 7.92411      | 4.5447  |

KR of (±)-2a from 4n:

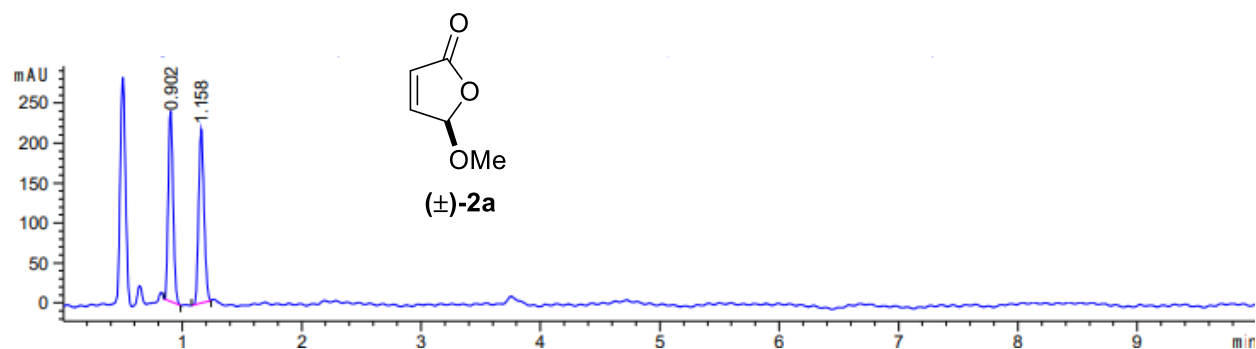

| Peak # | RetTime [min] | Type | Width [min] | Area [mAU*s] | Height [mAU] | Area %  |
|--------|---------------|------|-------------|--------------|--------------|---------|
| 1      | 0.902         | BB   | 0.0456      | 686.66113    | 238.61217    | 49.6206 |
| 2      | 1.158         | BB   | 0.0513      | 697.16071    | 217.87157    | 50.3794 |

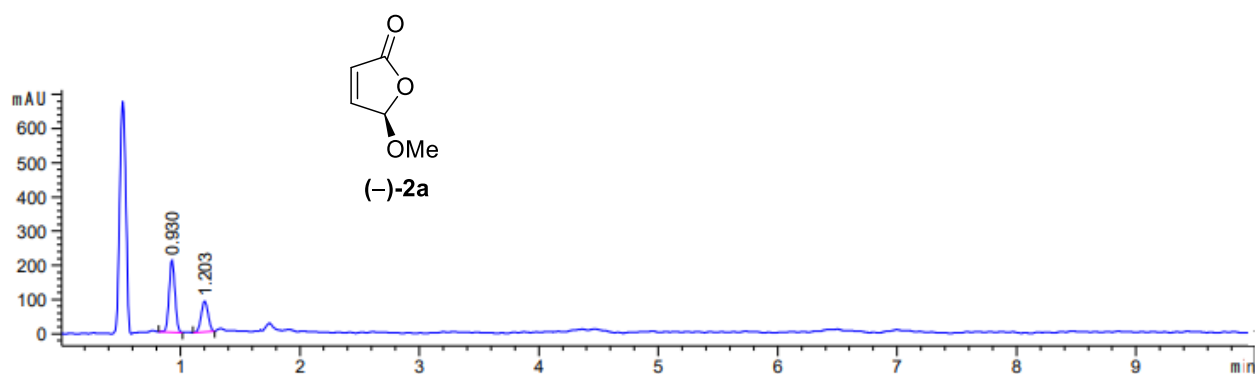

| Peak # | RetTime [min] | Type | Width [min] | Area [mAU*s] | Height [mAU] | Area %  |
|--------|---------------|------|-------------|--------------|--------------|---------|
| 1      | 0.930         | BB   | 0.0543      | 725.89624    | 210.33827    | 66.5040 |
| 2      | 1.203         | BB   | 0.0651      | 365.61185    | 90.54955     | 33.4960 |

KR of (±)-2a from 4o:

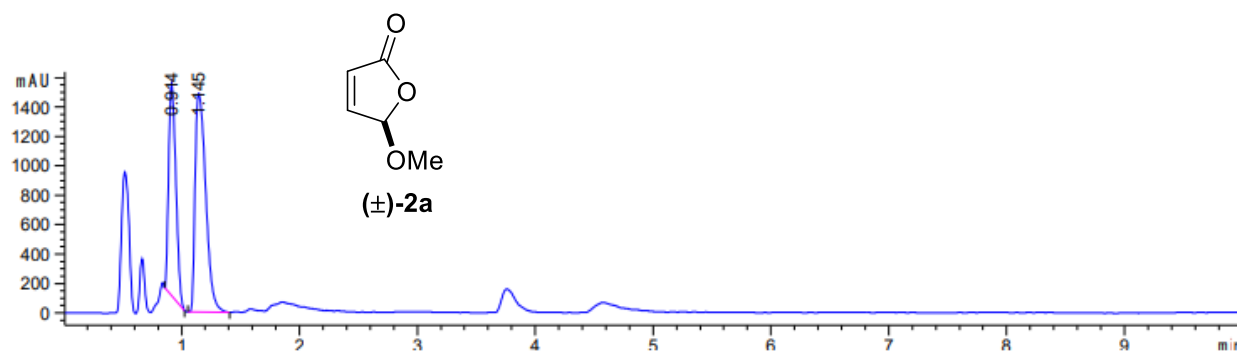

| Peak # | RetTime [min] | Type | Width [min] | Area [mAU*s] | Height [mAU] | Area %  |
|--------|---------------|------|-------------|--------------|--------------|---------|
| 1      | 0.914         | BB   | 0.0678      | 6159.93701   | 1442.85791   | 39.8519 |
| 2      | 1.145         | BB   | 0.1010      | 9297.12012   | 1486.59631   | 60.1481 |

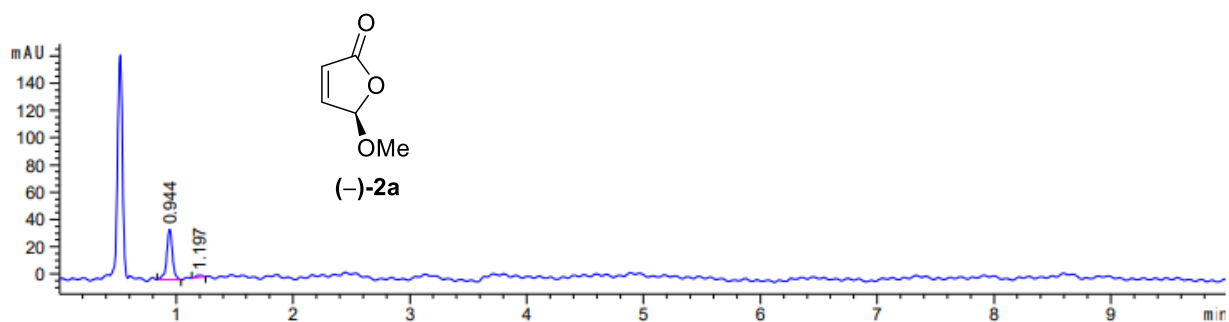

| Peak # | RetTime [min] | Type | Width [min] | Area [mAU*s] | Height [mAU] | Area %  |
|--------|---------------|------|-------------|--------------|--------------|---------|
| 1      | 0.944         | BB   | 0.0508      | 123.99955    | 37.28451     | 95.6876 |
| 2      | 1.197         | BB   | 0.0624      | 5.58831      | 1.53810      | 4.3124  |

KR of (±)-2a from 4p:

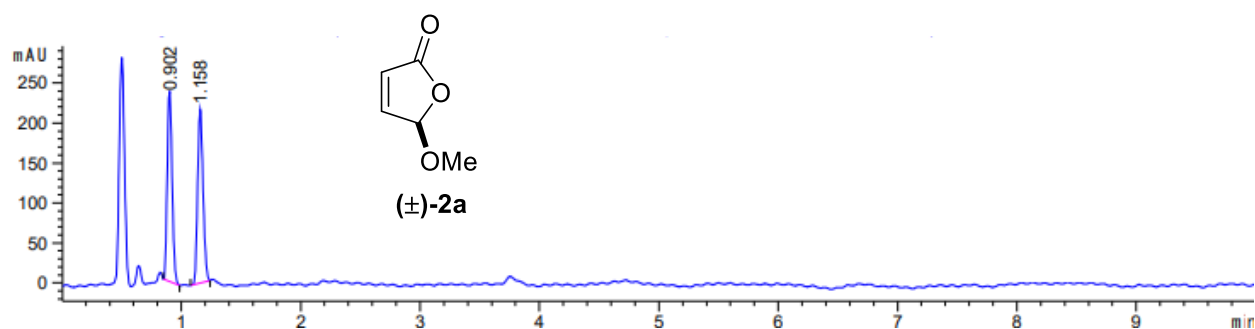

| Peak # | RetTime [min] | Type | Width [min] | Area [mAU*s] | Height [mAU] | Area %  |
|--------|---------------|------|-------------|--------------|--------------|---------|
| 1      | 0.902         | BB   | 0.0456      | 686.66113    | 238.61217    | 49.6206 |
| 2      | 1.158         | BB   | 0.0513      | 697.16071    | 217.87157    | 50.3794 |

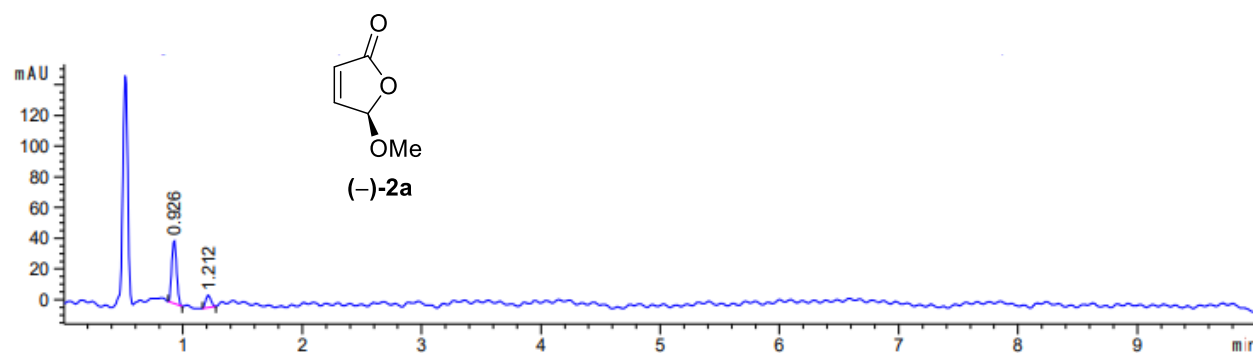

| Peak # | RetTime [min] | Type | Width [min] | Area [mAU*s] | Height [mAU] | Area %  |
|--------|---------------|------|-------------|--------------|--------------|---------|
| 1      | 0.926         | BB   | 0.0445      | 114.12401    | 40.98482     | 82.5295 |
| 2      | 1.212         | BB   | 0.0495      | 24.15869     | 7.93718      | 17.4705 |

KR of (±)-2a from 4q:

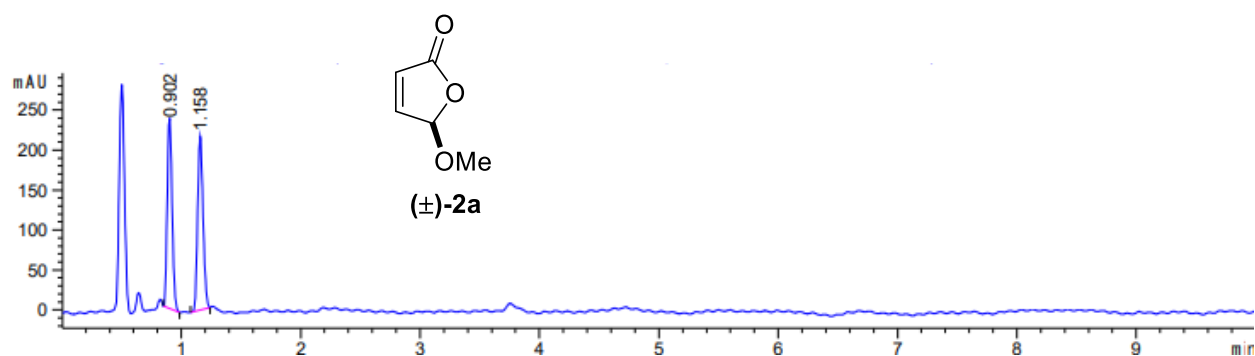

| Peak # | RetTime [min] | Type | Width [min] | Area [mAU*s] | Height [mAU] | Area %  |
|--------|---------------|------|-------------|--------------|--------------|---------|
| 1      | 0.902         | BB   | 0.0456      | 686.66113    | 238.61217    | 49.6206 |
| 2      | 1.158         | BB   | 0.0513      | 697.16071    | 217.87157    | 50.3794 |

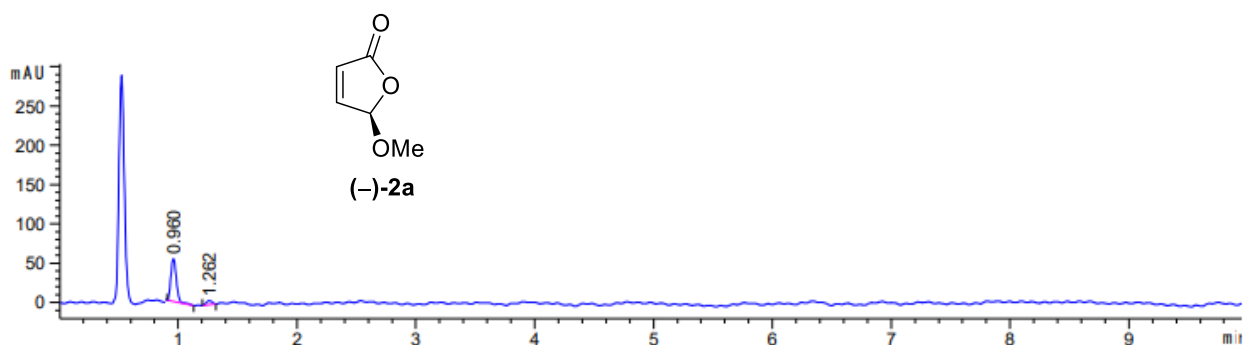

| Peak # | RetTime [min] | Type | Width [min] | Area [mAU*s] | Height [mAU] | Area %  |
|--------|---------------|------|-------------|--------------|--------------|---------|
| 1      | 0.960         | BB   | 0.0488      | 173.23550    | 54.91017     | 90.9553 |
| 2      | 1.262         | BB   | 0.0584      | 17.22666     | 4.97019      | 9.0447  |

KR of (±)-2a from 4r:

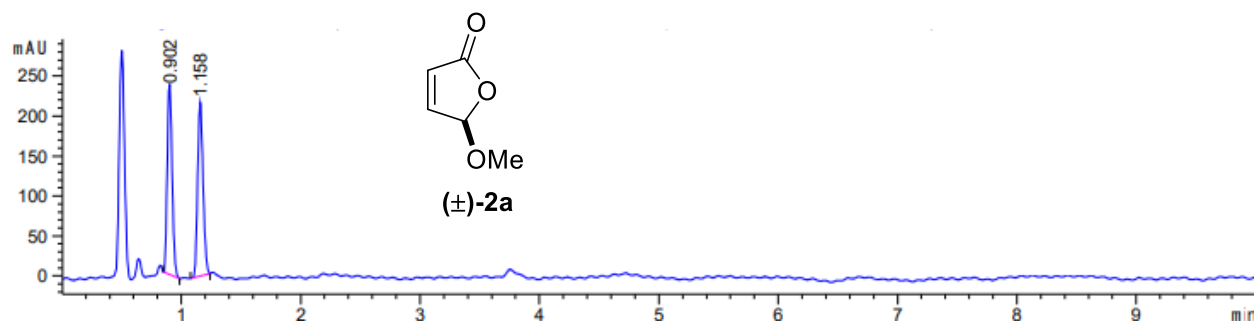

| Peak # | RetTime [min] | Type | Width [min] | Area [mAU*s] | Height [mAU] | Area %  |
|--------|---------------|------|-------------|--------------|--------------|---------|
| 1      | 0.902         | BB   | 0.0456      | 686.66113    | 238.61217    | 49.6206 |
| 2      | 1.158         | BB   | 0.0513      | 697.16071    | 217.87157    | 50.3794 |

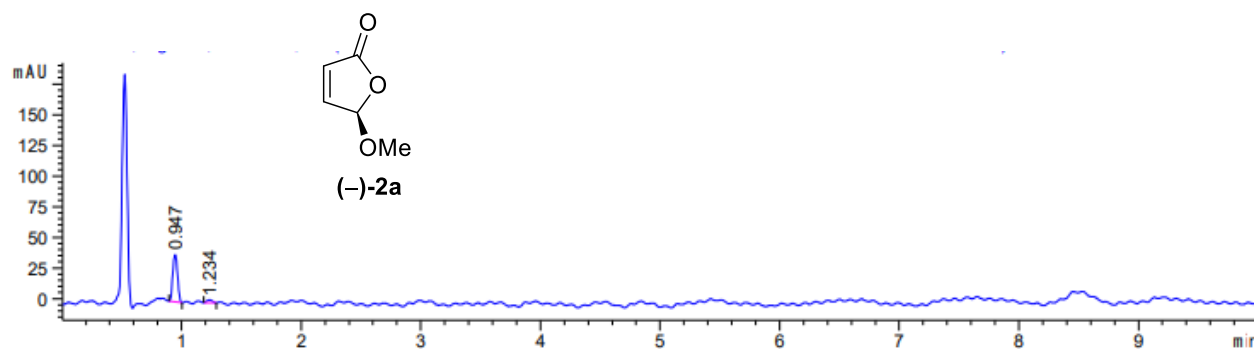

| Peak # | RetTime [min] | Type | Width [min] | Area [mAU*s] | Height [mAU] | Area %  |
|--------|---------------|------|-------------|--------------|--------------|---------|
| 1      | 0.947         | BB   | 0.0438      | 105.70779    | 38.74708     | 93.5133 |
| 2      | 1.234         | BB   | 0.0491      | 7.33263      | 2.43846      | 6.4867  |

KR of (±)-2a from 4s:

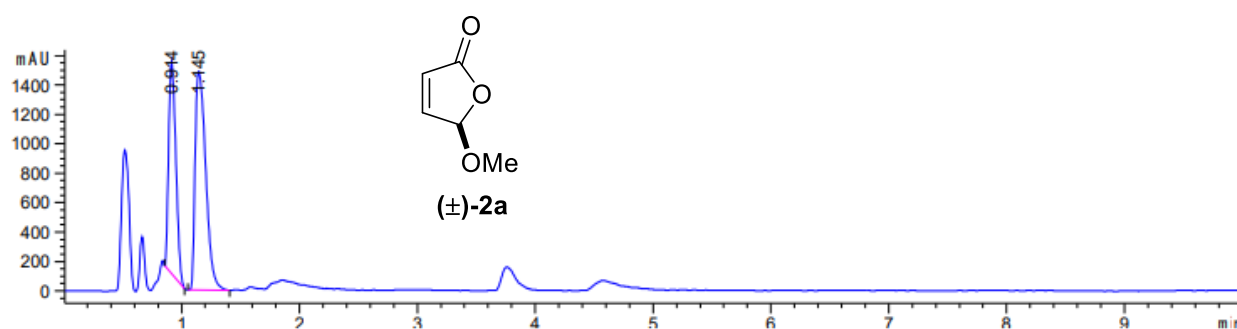

| Peak # | RetTime [min] | Type | Width [min] | Area [mAU*s] | Height [mAU] | Area %  |
|--------|---------------|------|-------------|--------------|--------------|---------|
| 1      | 0.914         | BB   | 0.0678      | 6159.93701   | 1442.85791   | 39.8519 |
| 2      | 1.145         | BB   | 0.1010      | 9297.12012   | 1486.59631   | 60.1481 |

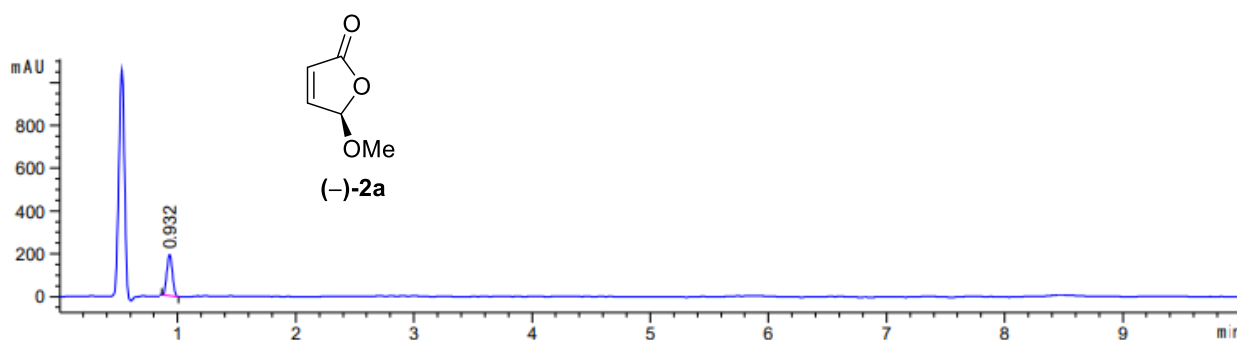

| Peak # | RetTime [min] | Type | Width [min] | Area [mAU*s] | Height [mAU] | Area %   |
|--------|---------------|------|-------------|--------------|--------------|----------|
| 1      | 0.932         | BB   | 0.0491      | 618.06915    | 194.24428    | 100.0000 |

KR of (±)-2b from 4t:

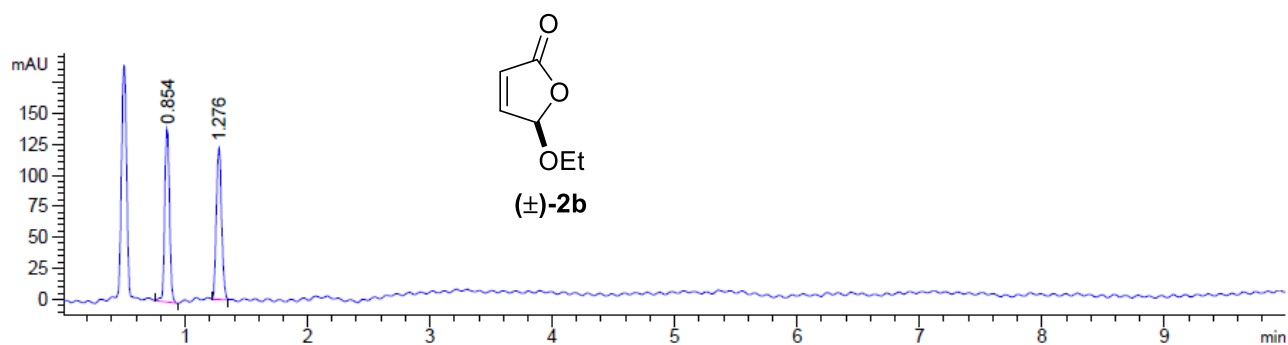

| Peak # | RetTime [min] | Type | Width [min] | Area [mAU*s] | Height [mAU] | Area %  |
|--------|---------------|------|-------------|--------------|--------------|---------|
| 1      | 0.854         | BB   | 0.0458      | 379.61874    | 139.47981    | 50.7067 |
| 2      | 1.276         | BB   | 0.0471      | 369.03726    | 122.63873    | 49.2933 |

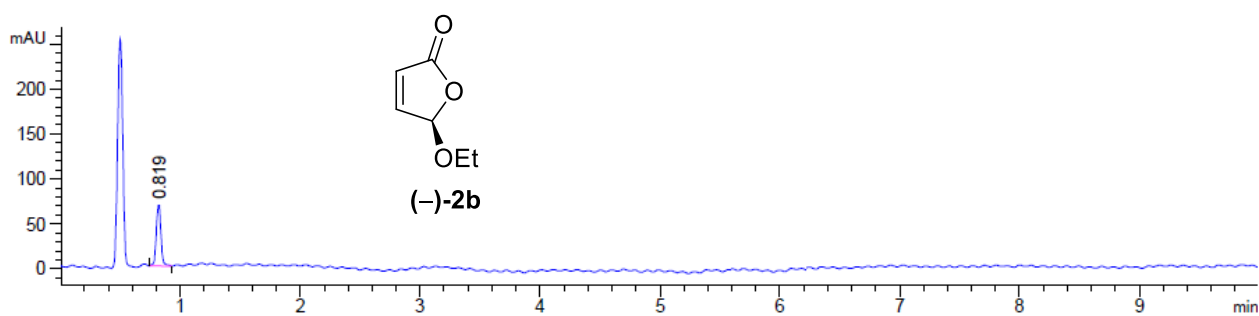

| Peak # | RetTime [min] | Type | Width [min] | Area [mAU*s] | Height [mAU] | Area %   |
|--------|---------------|------|-------------|--------------|--------------|----------|
| 1      | 0.819         | BB   | 0.0442      | 188.84473    | 68.32686     | 100.0000 |

KR of (±)-2c from 4u:

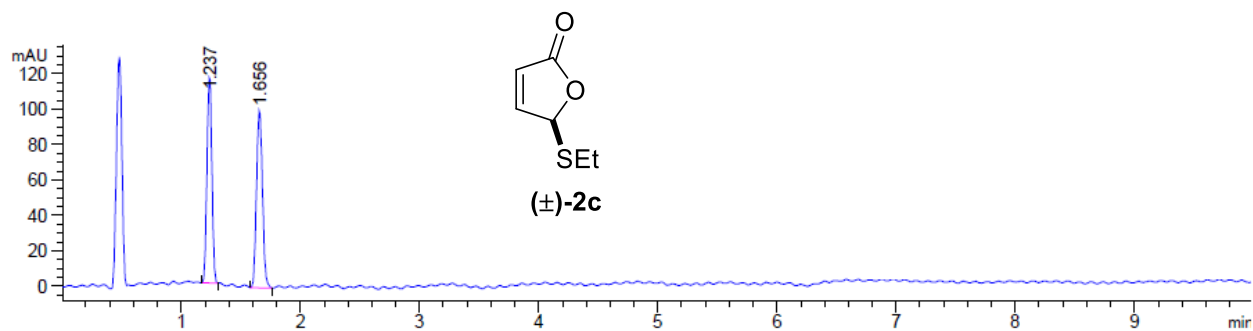

| Peak # | RetTime [min] | Type | Width [min] | Area [mAU*s] | Height [mAU] | Area %  |
|--------|---------------|------|-------------|--------------|--------------|---------|
| 1      | 1.237         | BB   | 0.0461      | 341.85675    | 117.04572    | 49.6405 |
| 2      | 1.656         | BB   | 0.0543      | 346.80777    | 100.43359    | 50.3595 |

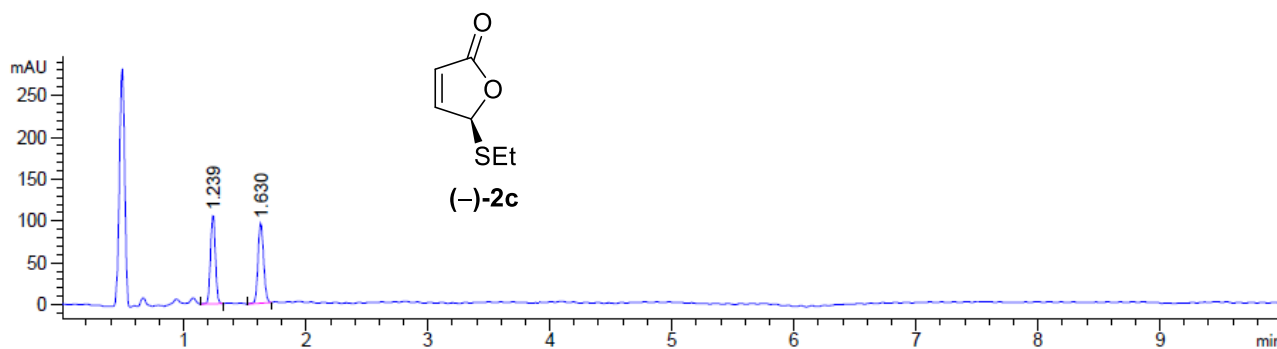

| Peak # | RetTime [min] | Type | Width [min] | Area [mAU*s] | Height [mAU] | Area %  |
|--------|---------------|------|-------------|--------------|--------------|---------|
| 1      | 1.239         | BB   | 0.0450      | 299.33105    | 105.76823    | 49.4912 |
| 2      | 1.630         | BB   | 0.0514      | 305.48575    | 95.24852     | 50.5088 |

KR of (±)-2d from 4v:

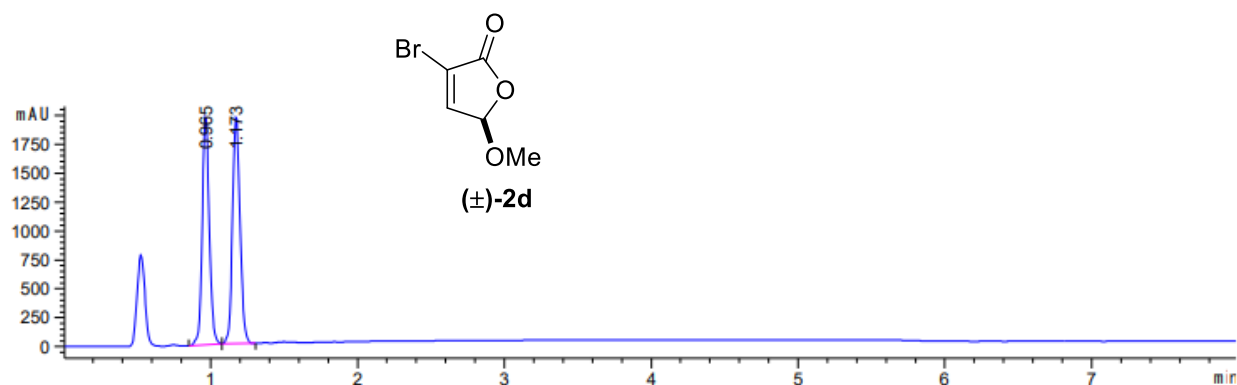

| Peak # | RetTime [min] | Type | Width [min] | Area [mAU*s] | Height [mAU] | Area %  |
|--------|---------------|------|-------------|--------------|--------------|---------|
| 1      | 0.965         | BB   | 0.0533      | 6667.19043   | 1976.82776   | 48.7281 |
| 2      | 1.173         | BB   | 0.0555      | 7015.25732   | 1970.61157   | 51.2719 |

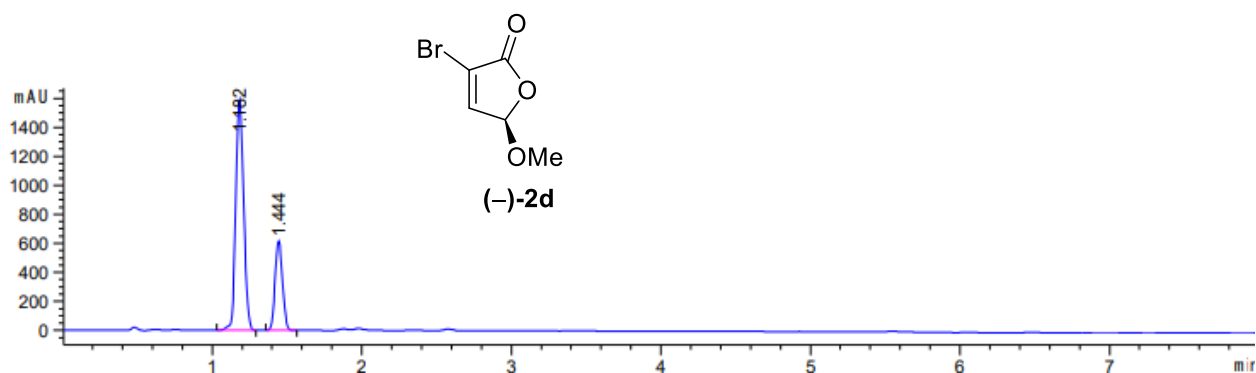

| Peak # | RetTime [min] | Type | Width [min] | Area [mAU*s] | Height [mAU] | Area %  |
|--------|---------------|------|-------------|--------------|--------------|---------|
| 1      | 1.182         | BB   | 0.0588      | 5867.20654   | 1599.92334   | 73.3996 |
| 2      | 1.444         | BB   | 0.0542      | 2126.30664   | 616.57935    | 26.6004 |

KR of (±)-2e from 4w:

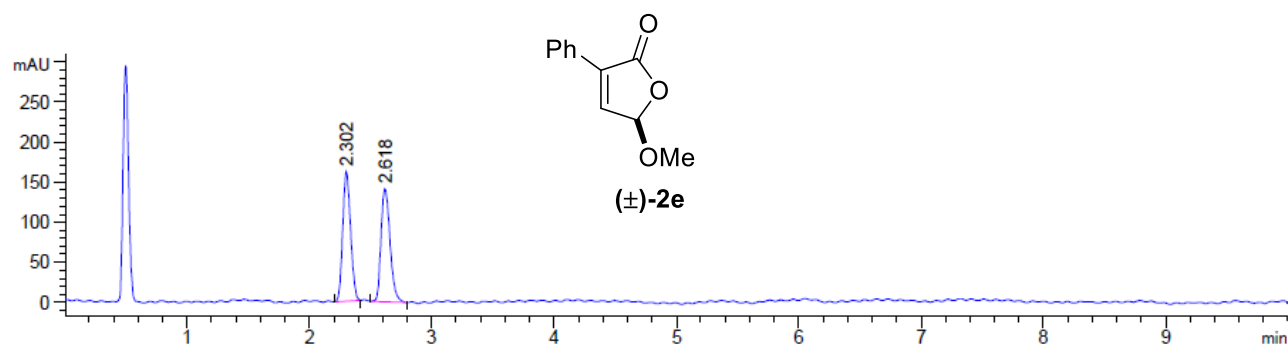

| Peak # | RetTime [min] | Type | Width [min] | Area [mAU*s] | Height [mAU] | Area %  |
|--------|---------------|------|-------------|--------------|--------------|---------|
| 1      | 2.302         | BB   | 0.0704      | 726.57471    | 161.81367    | 50.0702 |
| 2      | 2.618         | BB   | 0.0798      | 724.53595    | 141.27422    | 49.9298 |

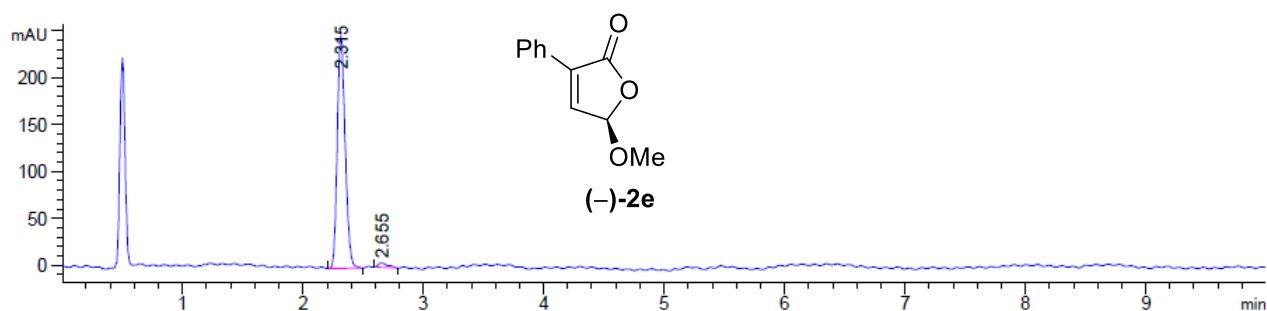

| Peak # | RetTime [min] | Type | Width [min] | Area [mAU*s] | Height [mAU] | Area %  |
|--------|---------------|------|-------------|--------------|--------------|---------|
| 1      | 2.315         | BB   | 0.0715      | 1135.88586   | 247.53522    | 97.6157 |
| 2      | 2.655         | BB   | 0.0821      | 27.74470     | 4.89479      | 2.3843  |

KR of (±)-2f from 4x:

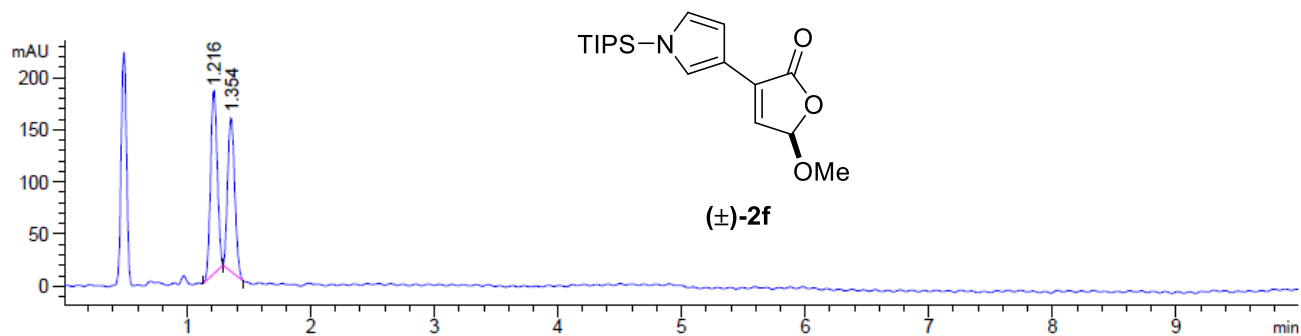

| Peak # | RetTime [min] | Type | Width [min] | Area [mAU*s] | Height [mAU] | Area %  |
|--------|---------------|------|-------------|--------------|--------------|---------|
| 1      | 1.216         | BB   | 0.0599      | 662.93372    | 176.15572    | 52.8634 |
| 2      | 1.354         | BB   | 0.0626      | 591.11621    | 147.84959    | 47.1366 |

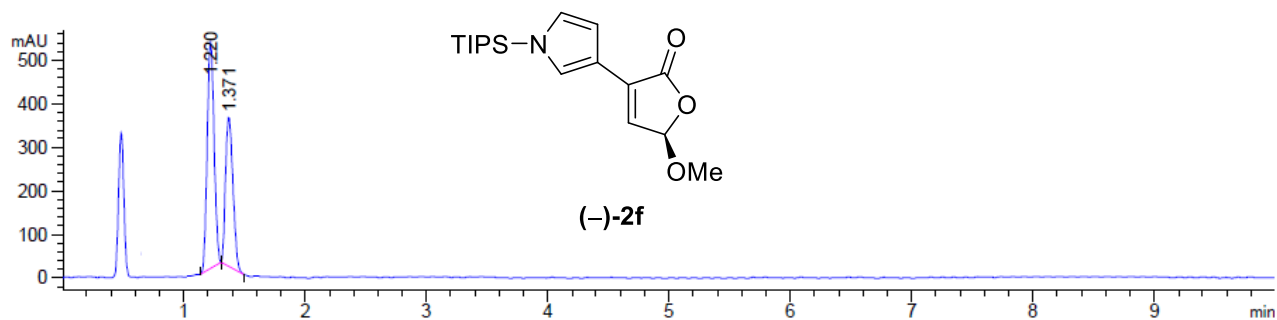

| Peak # | RetTime [min] | Type | Width [min] | Area [mAU*s] | Height [mAU] | Area %  |
|--------|---------------|------|-------------|--------------|--------------|---------|
| 1      | 1.220         | BB   | 0.0618      | 2042.16394   | 520.23370    | 58.5023 |
| 2      | 1.371         | BB   | 0.0651      | 1448.57654   | 343.85693    | 41.4977 |

KR of (±)-2g from 4y:

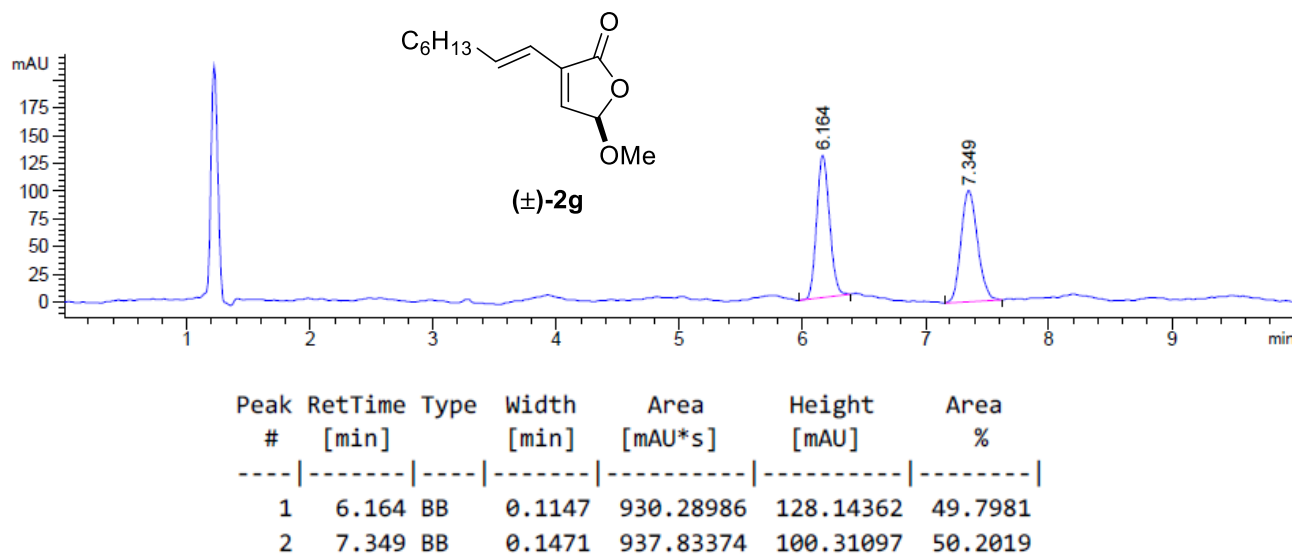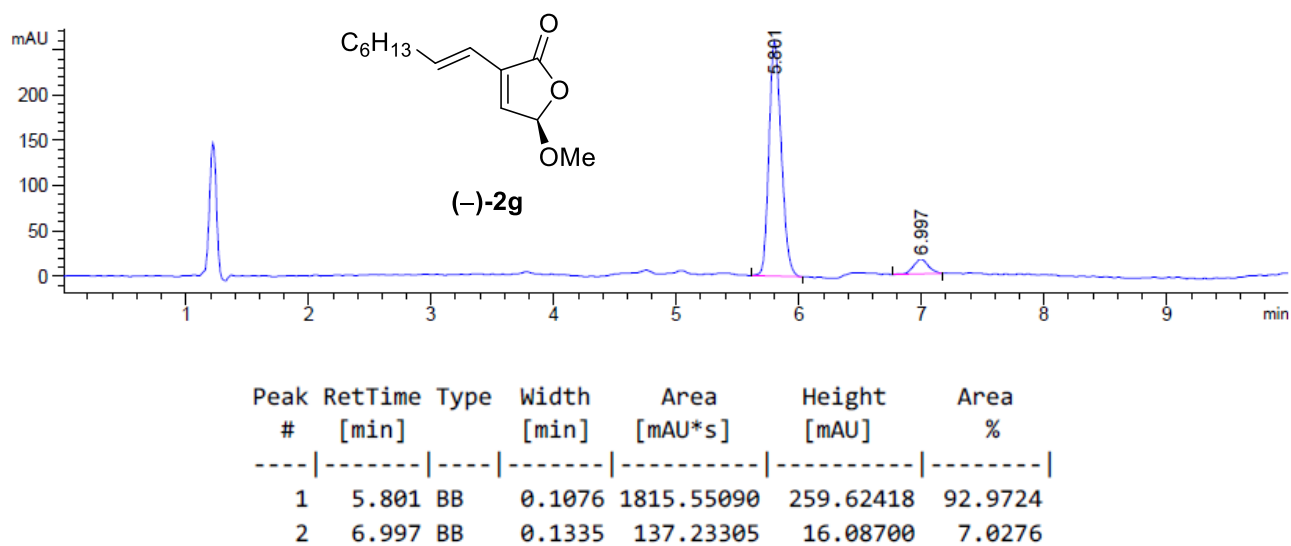

KR of (±)-2h from 4z:

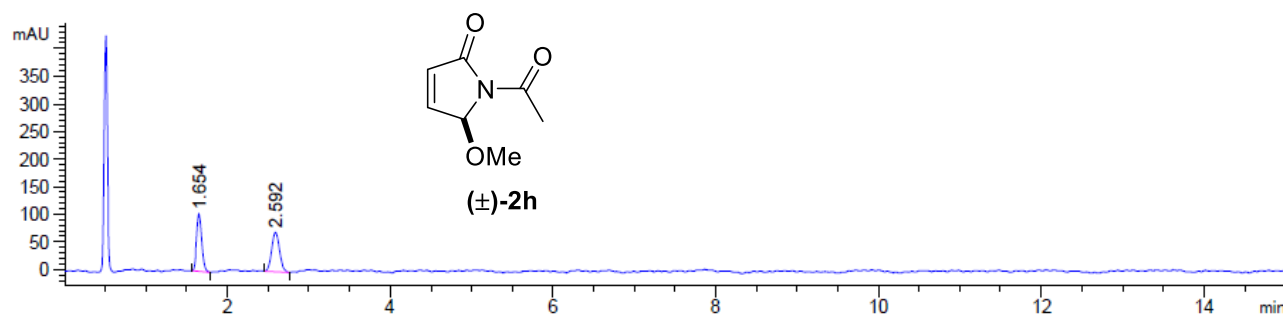

| Peak # | RetTime [min] | Type | Width [min] | Area [mAU*s] | Height [mAU] | Area %  |
|--------|---------------|------|-------------|--------------|--------------|---------|
| 1      | 1.654         | BB   | 0.0706      | 468.46790    | 103.88852    | 49.7782 |
| 2      | 2.592         | BB   | 0.1030      | 472.64288    | 71.58805     | 50.2218 |

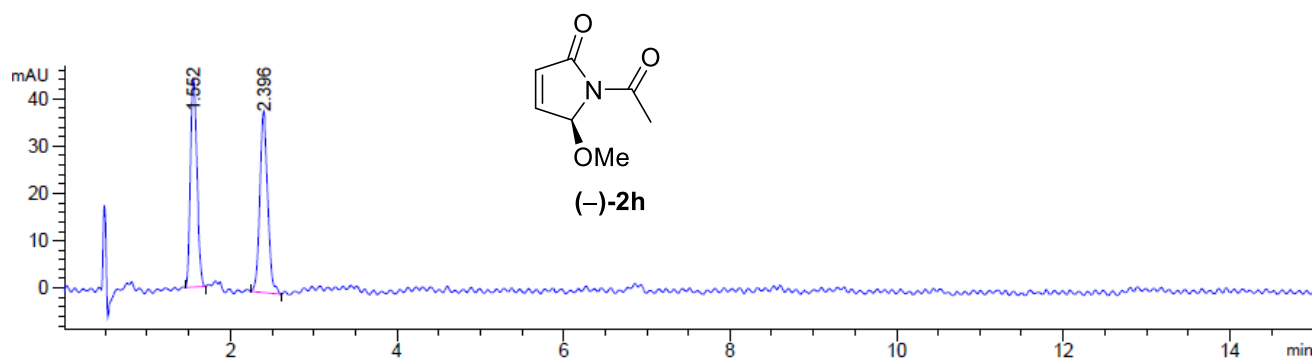

| Peak # | RetTime [min] | Type | Width [min] | Area [mAU*s] | Height [mAU] | Area %  |
|--------|---------------|------|-------------|--------------|--------------|---------|
| 1      | 1.552         | BB   | 0.0837      | 242.28333    | 44.36201     | 48.3742 |
| 2      | 2.396         | BB   | 0.1026      | 258.56918    | 38.39040     | 51.6258 |

## SFC-HPLC traces of compounds 5-7

Aza-Michael compound 5:

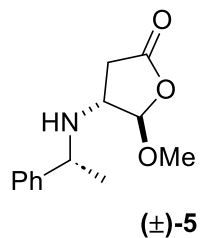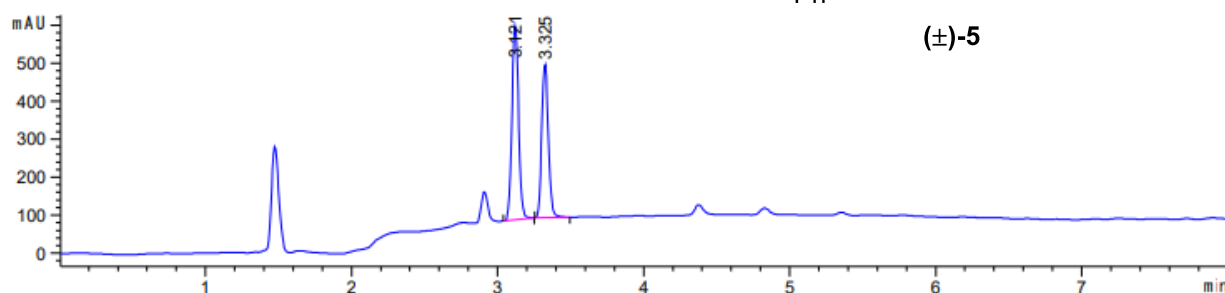

| Peak # | RetTime [min] | Type | Width [min] | Area [mAU*s] | Height [mAU] | Area %  |
|--------|---------------|------|-------------|--------------|--------------|---------|
| 1      | 3.121         | BB   | 0.0509      | 1610.57434   | 509.85294    | 55.7865 |
| 2      | 3.325         | BB   | 0.0488      | 1276.45935   | 404.43484    | 44.2135 |

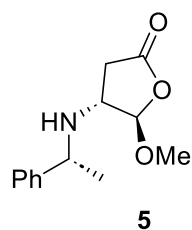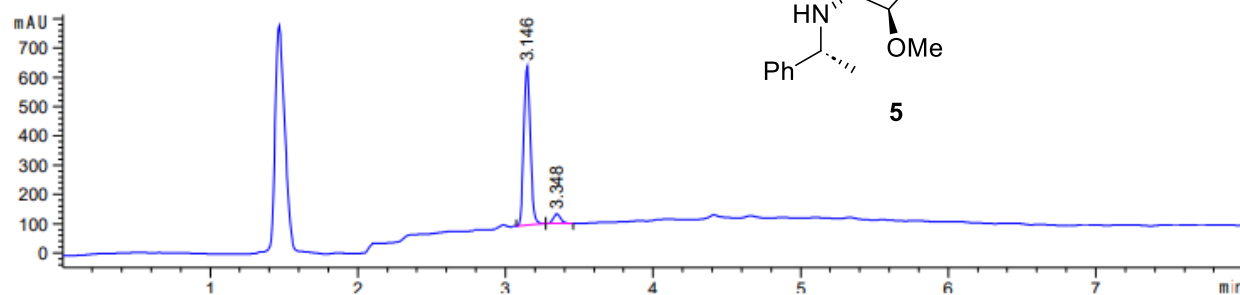

| Peak # | RetTime [min] | Type | Width [min] | Area [mAU*s] | Height [mAU] | Area %  |
|--------|---------------|------|-------------|--------------|--------------|---------|
| 1      | 3.146         | BB   | 0.0486      | 1702.55859   | 543.35657    | 93.8488 |
| 2      | 3.348         | BB   | 0.0536      | 111.59187    | 32.85496     | 6.1512  |

# Thio-Michael compound 6

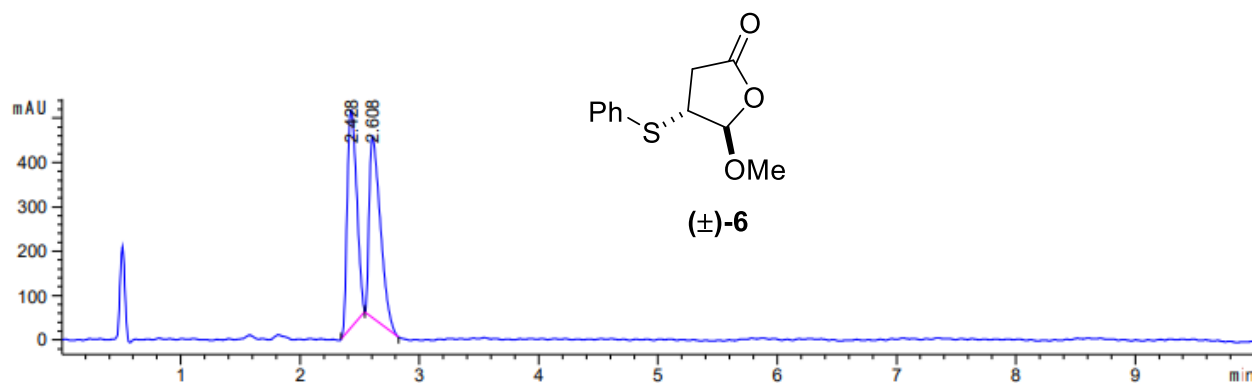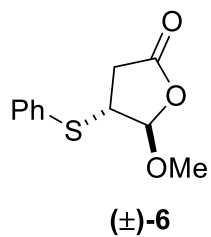

| Peak # | RetTime [min] | Type | Width [min] | Area [mAU*s] | Height [mAU] | Area %  |
|--------|---------------|------|-------------|--------------|--------------|---------|
| 1      | 2.428         | BB   | 0.0880      | 2691.50391   | 490.57840    | 50.2502 |
| 2      | 2.608         | BB   | 0.1081      | 2664.70361   | 408.36951    | 49.7498 |

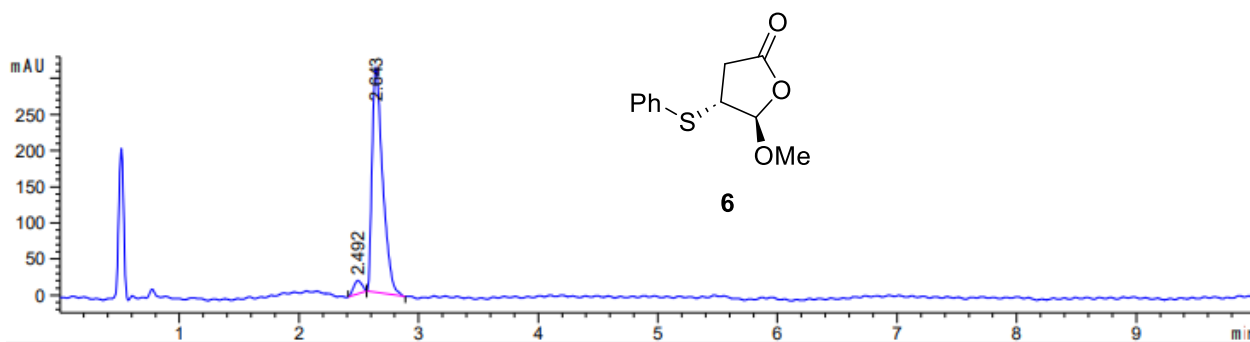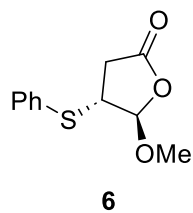

| Peak # | RetTime [min] | Type | Width [min] | Area [mAU*s] | Height [mAU] | Area %  |
|--------|---------------|------|-------------|--------------|--------------|---------|
| 1      | 2.492         | BB   | 0.0845      | 87.50557     | 18.08315     | 4.3935  |
| 2      | 2.643         | BB   | 0.0916      | 1904.19751   | 310.13232    | 95.6065 |

# Cycloadduct 7

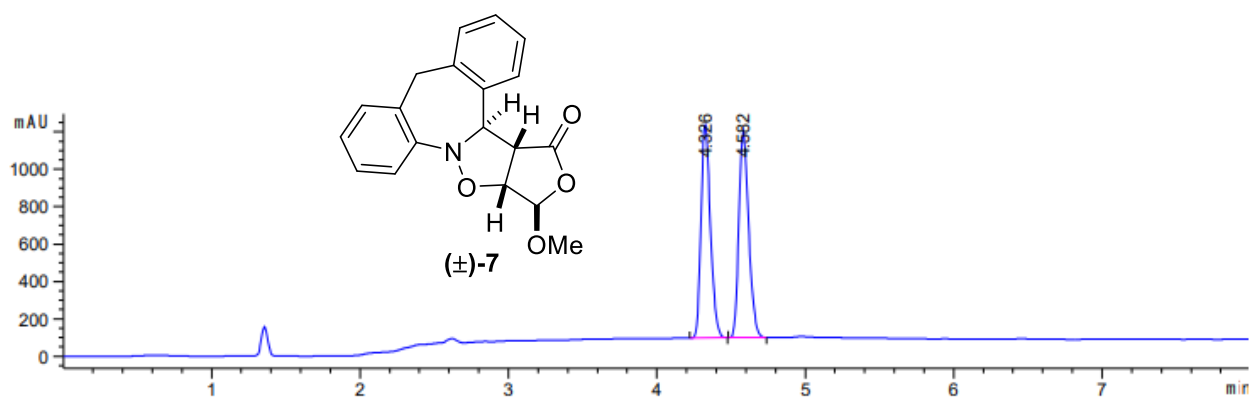

| Peak # | RetTime [min] | Type | Width [min] | Area [mAU*s] | Height [mAU] | Area %  |
|--------|---------------|------|-------------|--------------|--------------|---------|
| 1      | 4.326         | BB   | 0.0672      | 4999.12305   | 1140.20935   | 49.6593 |
| 2      | 4.582         | BB   | 0.0715      | 5067.72559   | 1105.24561   | 50.3407 |

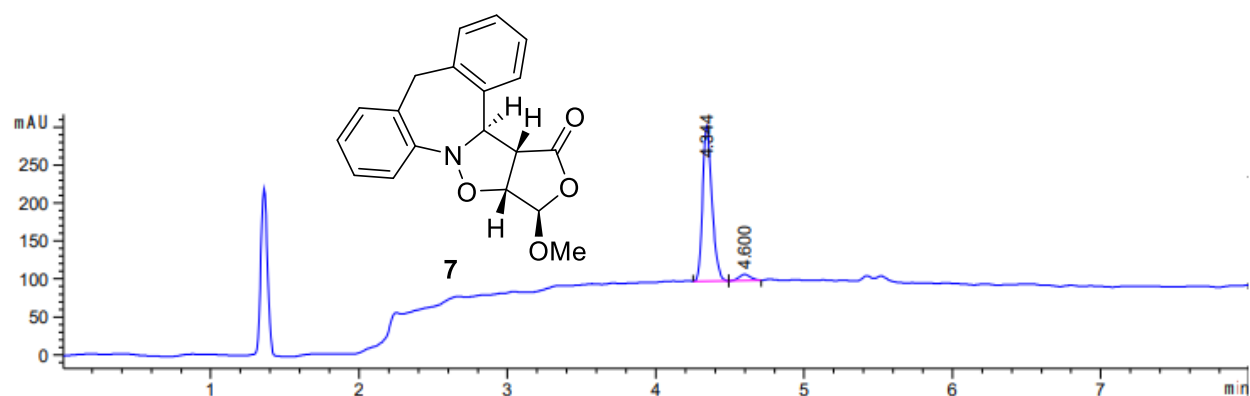

| Peak # | RetTime [min] | Type | Width [min] | Area [mAU*s] | Height [mAU] | Area %  |
|--------|---------------|------|-------------|--------------|--------------|---------|
| 1      | 4.344         | BB   | 0.0665      | 890.03308    | 205.46378    | 95.2882 |
| 2      | 4.600         | BB   | 0.0807      | 44.00993     | 8.19249      | 4.7118  |

## Quantum Chemistry Calculations: *endo/exo* approximations.

We have explored the energies of the four possible orientations of the two reactants for **1b** and ( $\pm$ )-**2a** i.e., two *endo* and two *exo* approximations. On a first test we optimized the TS for the C-C bond formation. The energies for each are given in Table S1 and the optimized structures can be viewed at [iochemBD](http://iochemBD.com) website.<sup>15</sup> The two *endo* approaches are the most favorable, being the one corresponding to the observed product the less energetic of all of them. Concerning the *exo* approaches, the one corresponding to the most energetic path, due mainly to steric repulsions, could not be optimized. For the other *exo* diastereoisomer the energy is 4.5 kcal·mol<sup>-1</sup> higher than for the TS C-C yielding the observed product.

**Table S1.** TS C-C energies for different approximations computed at B3LYP-D3BJ/6-31+G(d,p) level of theory.

| TS C-C                              | Potential energy<br>(E, Kcal·mol <sup>-1</sup> ) | Gibbs free energy<br>(G, Kcal·mol <sup>-1</sup> ) |
|-------------------------------------|--------------------------------------------------|---------------------------------------------------|
| <b><i>endo-anti</i><sup>a</sup></b> | -16.6                                            | 18.4                                              |
| <b><i>endo-syn</i></b>              | -16.1                                            | 19.5                                              |
| <b><i>exo-anti</i></b>              | -11.0                                            | 22.9                                              |
| <b><i>exo-syn</i><sup>b</sup></b>   | ----                                             | ----                                              |

<sup>a</sup> Observed compound. <sup>b</sup> Could not be optimized.

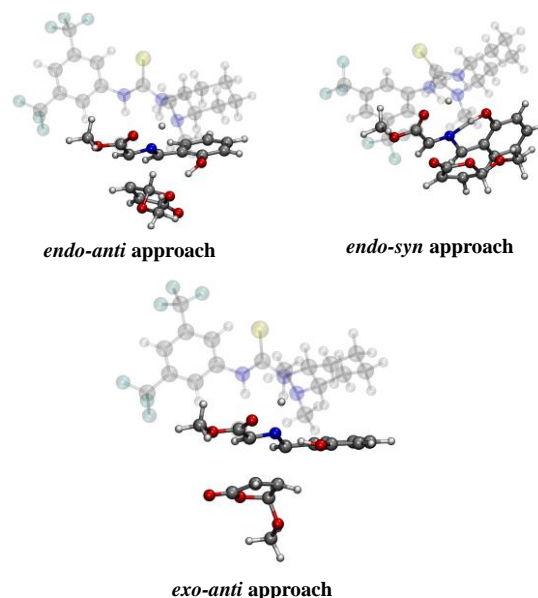

Afterwards, we found a different orientation of the ylide with respect to the catalyst that is most favorable than the previous one. Thus, we studied the four relative orientations of **1b** and ( $\pm$ )-**2a** for this new and more stable complex (Table S2). We could only optimize the TS for C-C bond formation within the *endo* approach yielding the observed product. Both *exo* transition states (TS C-C) found were much higher in energy (25.2 and 19.5 kcal·mol<sup>-1</sup> higher in terms of Gibbs free energies).

**Table S2.** TS C-C energies for different approximations computed at B3LYP-D3BJ/6-31+G(d,p) level of theory.

| TS C-C                              | Potential energy<br>(E, Kcal·mol <sup>-1</sup> ) | Gibbs free energy<br>(G, Kcal·mol <sup>-1</sup> ) |
|-------------------------------------|--------------------------------------------------|---------------------------------------------------|
| <b><i>endo-anti</i><sup>a</sup></b> | -34.2                                            | 1.5                                               |
| <b><i>endo-syn</i></b>              | ----                                             | ----                                              |
| <b><i>exo-anti</i></b>              | -9.0                                             | 26.7                                              |
| <b><i>exo-syn</i><sup>b</sup></b>   | -13.6                                            | 21.0                                              |

<sup>a</sup> Observed compound. <sup>b</sup> Could not be optimized.

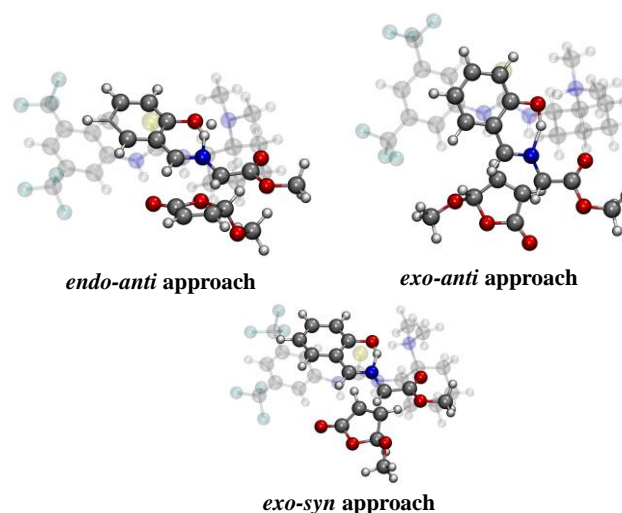

## References

- (1) (a) Wang, Y.; Gu, M. The Concept of Spectral Accuracy for MS. *Anal. Chem.* **2010**, *82*, 7055–7062. (b) Wang, Y. *Methods for Operating MS Instrument Systems*, United States Patent No. 6,983,213, **2006**. (c) Ochiai, N.; Sasamoto, K.; MacNamara, K. Characterization of Sulfur Compounds in Whisky by Full Evaporation Dynamic Headspace and Selectable One-Dimensional/Two-Dimensional Retention Time Locked Gas Chromatography–Mass Spectrometry with Simultaneous Element-Specific Detection. *J. Chromatogr. A* **2012**, *1270*, 296–304. (d) Ho, H. -P.; Lee, R. -Y.; Chen, C. -Y.; Wang, S. -R.; Li, Z. -G.; Lee, M. -R. Identification of New Minor Metabolites of Penicillin G in Human Serum by Multiple-Stage Tandem Mass Spectrometry. *Rapid Commun. Mass Spectrom.* **2011**, *25*, 25–32.
- (2) Amornraksa, K.; Grigg, R.; Gunaratne, H. Q. N.; Kemp, J.; Sridharan, V. X=Y–ZH Systems as Potential 1,3-Dipoles. Part 8. Pyrrolidines and  $\Delta^5$ -Pyrrolines (3,7-Diazabicyclo[3.3.0]octenes) from the Reaction of Imines of  $\alpha$ -Amino Acids and their Esters with Cyclic Dipolarophiles. Mechanism of Racemisation of  $\alpha$ -Amino Acids and their Esters in the Presence of Aldehydes. *J. Chem. Soc., Perkin. Trans. 1* **1987**, 2285–2296.
- (3) Esteban, F.; Cieslik, W.; Arpa, E. M.; Guerrero-Corella, A.; Díaz-Tendero, S.; Perles, J.; Fernández-Salas, J. A.; Fraile, A.; Alemán, J. Intramolecular Hydrogen Bond Activation: Thiourea-Organocatalyzed Enantioselective 1,3-Dipolar Cycloaddition of Salicylaldehyde-Derived Azomethine Ylides with Nitroalkenes. *ACS Catal.* **2018**, *8*, 1884–1890.
- (4) Dikumar, E. A. Synthesis of (*E*)-2-Methoxy-6-(*R*-imino)methylphenols and 2-Methoxy-6-(*R*-amino)methylphenols. *Russ. J. Gen. Chem.* **2012**, *82*, 693–696.
- (5) Müller, J.; Kehr, G.; Fröhlich, R.; Erker, G. Structural Features of Titanium Complexes of Salicylaldiminato Derivatives of Amino Acids. *Eur. J. Inorg. Chem.* **2005**, 2836–2841.
- (6) Shapenova, D. S.; Shiryaev, A. A.; Bolte, M.; Kukulka, M.; Szczepanik, D. W.; Hooper, J.; Babashkina, M. G.; Mahmoudi, G.; Mitoraj, M. P.; Safin, D. A. Resonance Assisted Hydrogen Bonding Phenomenon Unveiled through Both Experiments and Theory: A New Family of Ethyl *N*-Salicylidene-glycinate Dyes. *Chem. Eur. J.* **2020**, *26*, 12987–12995.
- (7) Feringa, B. L.; de Lange, B. Asymmetric 1,4-Additions to 5-Alkoxy-2(5*H*)-furanones: An Efficient Synthesis of (*R*)- and (*S*)-3,4-Epoxy-1-butanol. *Tetrahedron* **1988**, *44*, 7213–7222.
- (8) Landor, S. R.; Landor, P. D.; Kalli, M. The Synthesis of a Cyclopropane Amino Acid, *trans*- $\alpha$ -(Carboxycyclopropyl) glycine, found in Ackee Seed. *J. Chem. Soc., Perkin Trans. 1* **1983**, 2921–2925.
- (9) Fariña, F.; Martín, M. V.; Martín-Aranda, R. M.; de Guereño, A. M. Pseudoesters and Derivatives. XXXI. Synthesis of 5-Ethylthio-, 5-Ethylsulfinyl- and 5-Ethylsulfonylfuran-2(5*H*)-ones. *Synth. Commun.* **1992**, *23*, 459–472.
- (10) Fariña, F.; Martín, M. R.; Martín, M. V. Pseudoesters and Derivatives. XI. Synthesis and Structure of Derivatives of 2-Bromo- and 2-Chloro-4-oxo-2-butenoic Acid. *An. Quim.* **1979**, *75*, 144–149.
- (11) Vasamsetty, L.; Sahu, D.; Ganguly, B.; Khan, F. A.; Mehta, G. Total synthesis of novel bioactive natural product paracaseolide A and analogues: computational evaluation of a ‘proposed’ biomimetic Diels-Alder reaction. *Tetrahedron* **2014**, *70*, 8488–8497.
- (12) Faber, W. S.; Kok, J.; de Lange, B.; Feringa, B. L. Catalytic Kinetic Resolution of 5-Alkoxy-2(5*H*)-furanones. *Tetrahedron* **1994**, *50*, 4775–4794.

- (13) Feringa, B. L., de Lange, B. Asymmetric 1,4-additions to 5-alkoxy-2(5h)-furanones: An efficient synthesis of (*R*)- and (*S*)-3,4-epoxy-1-butanol. *Tetrahedron* **1988**, *44*, 7213–7222.
- (14) García Ruano, J. L.; Andrés Gil, J. I.; Fraile, A.; Martín Castro, A. M.; Martín, M. R. Asymmetric 1,3-Dipolar Reactions of 3-Sulfinylfuran-2(5*H*)-ones with 11*H*-Dibenzo[b,e]azepine 5-oxide. Synthesis of Pyrroloazepines via Isoxazoloazepines. *Tetrahedron Lett.* **2004**, *45*, 4653–4656.
- (15) All the optimized structures computed can be visualized and download from <http://dx.doi.org/10.19061/iochem-bd-8-10>.
